# Supplementary material for: Cluster Analysis of Seismicity in the Eastern Gulf of Corinth Based on a Waveform Template Matching Catalog
Source: Sensors (Basel). 2023 Mar 8;23(6):2923. doi: 10.3390/s23062923 (PMC10056727; doi:10.3390/s23062923)
Supplement: Supplementary file 1 [file sensors-23-02923-s001.zip]

Archive with 5 entries (5 files):
- E1_CAT1_perachora_templates-only.xlsx
- E2_CAT2_perachora_LTK-detections_fixed-locations.xlsx
- E3_CAT3_perachora_templates+detections_relocated.xlsx
- M1_EGoC_3D_model.fig
- Supplementary Material.pdf
