# Supplementary material for: Cluster Analysis of Seismicity in the Eastern Gulf of Corinth Based on a Waveform Template Matching Catalog
Source: Sensors (Basel). 2023 Mar 8;23(6):2923. doi: 10.3390/s23062923 (PMC10056727; doi:10.3390/s23062923)
Supplement: Supplementary file 1 [file sensors-23-02923-s001.zip › E1_CAT1_perachora_templates-only.xlsx]

## Sheet: Sheet1
Year	Month	Day	Hour	Min	Sec	Latitude	Longitude	Depth	Magnitude	spatial ID	MinDist	RMS	Npha	Gap	Nsta	event-code	near C0.64	far C0.50	Description
2020	1	1	22	36	39.235	38.1732	22.7374	18.07	2	6	14	0.37	41	36	27	2020-01-01-22-36-39	1	1	Template reloc
2020	1	9	20	40	32.446	38.0134	23.0053	6.71	1.2	1	4	0.23	23	64	18	2020-01-09-20-40-32	2	2	Template reloc
2020	1	10	7	52	7.625	38.1384	22.615	8.57	1.6	9	7	0.22	36	41	25	2020-01-10-07-52-08	3	3	Template reloc
2020	1	11	20	25	12.442	38.0645	22.8566	7.02	1.5	2	10	0.3	46	52	29	2020-01-11-20-25-13	4	4	Template reloc
2020	1	17	5	30	33.54	38.1797	22.7088	9.37	1.9	6	13	0.22	29	38	22	2020-01-17-05-30-33	1	5	Template reloc
2020	1	17	14	16	34.201	38.1826	22.7122	5.07	2	6	15	0.71	79	29	55	2020-01-17-14-16-34	1	6	Template reloc
2020	1	17	15	51	19.65	38.1876	22.7203	11.26	2	6	14	0.2	48	36	35	2020-01-17-15-51-20	1	7	Template reloc
2020	1	17	19	10	15.002	38.2011	22.7355	7.1	1.7	6	14	0.43	45	36	36	2020-01-17-19-10-15	1	1	Template reloc
2020	1	18	0	45	43.521	38.1782	22.7135	6.23	1.7	6	13	0.17	35	37	23	2020-01-18-00-45-42	1	8	Template reloc
2020	1	18	1	37	24.747	38.1858	22.7529	15.98	1.5	6	14	0.16	21	69	17	2020-01-18-01-37-23	1	8	Template reloc
2020	1	18	21	11	6.307	38.063	22.8587	7.06	1.5	2	10	0.33	36	61	28	2020-01-18-21-11-07	5	9	Template reloc
2020	1	19	1	42	55.754	38.0845	22.8171	46.31	1.2	4	12	0.47	31	59	21	2020-01-19-01-42-58	1	1	Template loc
2020	1	20	6	12	51.669	38.1743	22.6421	13	1.9	9	11	0.37	49	41	32	2020-01-20-06-12-52	6	10	Template reloc
2020	1	22	16	33	55.922	38.1803	22.7285	13.3	1.8	6	14	0.23	58	34	39	2020-01-22-16-33-56	1	11	Template reloc
2020	1	24	9	6	7.271	38.1869	22.7195	12.36	1.7	6	14	0.27	37	36	26	2020-01-24-09-06-05	1	7	Template reloc
2020	1	24	18	46	16.278	38.2007	22.7449	5.79	1.5	6	16	0.26	24	59	18	2020-01-24-18-46-14	7	12	Template reloc
2020	1	25	17	18	49.105	38.2609	22.7628	6.49	1.7	7	13	0.45	27	67	19	2020-01-25-17-18-49	8	13	Template reloc
2020	1	25	23	14	32.947	38.1064	22.7453	30.81	1.1	8	11	0.2	24	51	18	2020-01-25-23-14-33	1	14	Template reloc
2020	1	25	23	37	38.088	38.1689	22.7221	16.91	2.2	6	13	0.49	86	25	52	2020-01-25-23-37-39	1	14	Template reloc
2020	1	26	0	2	3.768	38.1882	22.716	6.17	1.7	6	12	0.4	55	37	35	2020-01-26-00-02-03	1	5	Template reloc
2020	1	26	0	16	27.591	38.1816	22.7122	8.2	1.4	6	13	0.39	32	30	22	2020-01-26-00-16-27	1	8	Template reloc
2020	1	26	5	5	47.644	38.1719	22.7179	16.04	1.7	6	14	0.34	33	38	27	2020-01-26-05-05-47	1	5	Template reloc
2020	1	30	7	42	36.2	38.1796	22.7382	15.77	2.8	6	15	0.32	85	24	53	2020-01-30-07-42-37	7	12	Template reloc
2020	1	31	3	34	58.776	38.1759	22.7264	17.05	1.6	6	15	0.42	44	36	28	2020-01-31-03-34-57	1	1	Template reloc
2020	2	1	21	58	41.023	38.197	22.5154	14.44	1.6	10	17	0.2	60	44	43	2020-02-01-21-58-41	9	15	Template reloc
2020	2	3	3	1	47.548	38.0831	22.7955	7.76	1.1	4	11	0.31	29	54	22	2020-02-03-03-01-47	10	16	Template reloc
2020	2	3	16	25	44.28	38.1108	22.8872	9.56	1.6	2	13	0.78	68	46	41	2020-02-03-16-25-45	11	17	Template reloc
2020	2	4	2	49	34.899	38.1157	22.7824	13.36	1.8	4	15	0.58	49	26	39	2020-02-04-02-49-35	12	18	Template reloc
2020	2	8	1	50	55.204	38.151	22.6776	10.69	1.9	8	10	0.28	44	34	35	2020-02-08-01-50-55	13	19	Template reloc
2020	2	8	4	6	44.508	38.1649	22.685	7.48	2	8	10	0.44	33	60	24	2020-02-08-04-06-44	13	19	Template reloc
2020	2	10	0	40	34.156	38.0593	22.8551	6.75	1.8	2	10	0.33	67	48	46	2020-02-10-00-40-35	5	9	Template reloc
2020	2	12	21	32	14.157	38.0786	22.8589	9.08	1.6	3	11	0.52	41	65	30	2020-02-12-21-32-14	14	20	Template reloc
2020	2	12	22	11	13.6	38.0672	22.8553	10.29	1.5	3	10	0.59	42	64	31	2020-02-12-22-11-14	14	20	Template reloc
2020	2	14	20	10	54.604	38.1973	22.6211	16.31	1.7	9	13	0.15	22	90	16	2020-02-14-20-10-25	15	21	Template reloc
2020	2	17	6	30	33.237	38.2013	22.6239	15.89	1.9	9	14	0.21	40	46	29	2020-02-17-06-30-32	16	22	Template reloc
2020	2	17	23	44	31.241	38.1645	22.6028	23.5	1.1	10	13	0.22	24	54	18	2020-02-17-23-44-28	17	23	Template reloc
2020	2	18	2	46	53.584	38.1969	22.6188	15.75	1.1	9	14	0.11	24	51	18	2020-02-18-02-46-53	16	22	Template reloc
2020	2	18	4	30	40.735	38.2541	22.7228	14.39	2	7	16	0.28	72	39	44	2020-02-18-04-30-41	18	24	Template reloc
2020	2	18	4	32	22.763	38.2527	22.7231	3.42	1.7	7	16	0.35	48	59	30	2020-02-18-04-32-23	18	24	Template reloc
2020	2	19	8	52	59.494	38.1819	22.4372	5.21	1.8	0	20	0.59	29	89	23	2020-02-19-08-52-59	19	25	Template loc
2020	2	20	6	8	36.128	38.1919	22.7393	5.71	1.3	6	15	0.64	24	58	18	2020-02-20-06-08-36	1	11	Template reloc
2020	2	21	5	44	35.021	38.2629	22.7272	5.74	2.2	7	15	0.55	63	59	42	2020-02-21-05-44-36	18	24	Template reloc
2020	2	21	21	3	9.107	38.1738	22.733	12.21	1.6	6	13	0.3	28	55	19	2020-02-21-21-03-09	20	26	Template reloc
2020	2	21	21	38	16.054	38.0714	22.8788	11.44	1.8	3	10	0.54	84	38	47	2020-02-21-21-38-17	21	27	Template reloc
2020	2	22	10	16	4.75	38.0298	22.8264	31.54	1.5	0	8	0.76	32	71	24	2020-02-22-10-16-04	22	28	Template loc
2020	2	24	1	40	56.599	38.0704	22.9217	7.47	1.2	2	7	0.82	31	66	22	2020-02-24-01-40-56	23	29	Template reloc
2020	2	24	10	31	23.328	38.0762	22.8787	11.74	2	3	10	0.24	41	45	30	2020-02-24-10-31-24	24	30	Template reloc
2020	2	24	12	57	46.953	38.2491	22.7201	16.25	1.7	7	16	0.31	31	65	20	2020-02-24-12-57-48	18	24	Template reloc
2020	2	24	13	55	19.179	38.0635	22.8732	6.93	2	2	11	0.56	43	62	28	2020-02-24-13-55-20	23	29	Template reloc
2020	2	24	18	54	30.132	38.0299	22.8833	10.02	1.4	3	8	0.59	38	61	24	2020-02-24-18-54-02	23	29	Template reloc
2020	2	25	12	38	6.192	38.0644	22.8703	7.85	1.5	2	11	0.06	24	62	24	2020-02-25-12-38-06	23	29	Template reloc
2020	2	25	23	25	43.407	38.1841	22.6425	13.71	1.7	9	12	0.41	51	39	37	2020-02-25-23-25-44	6	31	Template reloc
2020	2	26	10	9	35.146	38.0553	22.8729	9.65	1.8	3	6	0.48	53	61	33	2020-02-26-10-09-35	23	29	Template reloc
2020	2	27	20	59	20.581	38.0146	22.6807	6.83	1.4	0	4	0.32	33	62	26	2020-02-27-20-59-20	25	32	Template loc
2020	2	28	2	12	13.975	38.1923	22.6909	16.9	1.6	6	13	0.1	44	40	32	2020-02-28-02-12-14	26	33	Template reloc
2020	2	28	2	22	4.093	38.2394	22.5925	11.86	1.6	10	18	0.29	29	47	23	2020-02-28-02-22-03	27	34	Template reloc
2020	3	1	19	34	20.379	38.17	22.6523	14.44	1.7	9	11	0.29	83	37	52	2020-03-01-19-34-20	28	35	Template reloc
2020	3	2	16	19	48.582	38.1797	22.6967	21.07	1.6	6	13	0.31	24	46	19	2020-03-02-16-19-48	26	33	Template reloc
2020	3	2	20	34	2.071	38.1742	22.4627	15.89	1.4	10	18	0.17	41	66	28	2020-03-02-20-34-02	29	36	Template reloc
2020	3	5	15	44	16.677	38.1393	23.0396	39.42	1.5	0	14	0.13	25	84	18	2020-03-05-15-44-17	30	37	Template loc
2020	3	5	21	1	37.14	38.0405	22.8332	12.87	1.6	5	10	0.21	29	60	20	2020-03-05-21-01-37	31	38	Template reloc
2020	3	5	23	47	6.229	38.0667	22.7646	9.78	1.1	4	6	0.07	19	58	15	2020-03-05-23-46-46	32	39	Template reloc
2020	3	6	2	29	40.756	38.1017	22.8923	12.31	1.6	2	12	0.46	34	71	23	2020-03-06-02-29-41	33	40	Template reloc
2020	3	7	8	20	11.57	38.1494	22.9741	6.16	3.9	2	13	0.34	130	33	81	2020-03-07-08-20-11	34	41	Template reloc
2020	3	7	12	55	7.57	38.1472	22.9618	13.11	2.1	2	13	0.55	100	52	59	2020-03-07-12-55-08	34	41	Template reloc
2020	3	8	0	38	58.594	38.1493	22.6745	4.71	0.9	8	8	0.23	35	31	28	2020-03-08-00-38-58	35	42	Template reloc
2020	3	8	0	39	12.838	38.127	22.6774	11.24	2	8	4	0.38	25	62	18	2020-03-08-00-38-14	35	42	Template reloc
2020	3	8	0	41	9.079	38.1412	22.6765	11.54	2.2	8	10	0.25	82	33	56	2020-03-08-00-41-09	35	42	Template reloc
2020	3	8	8	27	30.388	38.0682	22.8646	7.18	1.7	2	9	0.77	54	66	38	2020-03-08-08-27-31	23	27	Template reloc
2020	3	8	14	36	53.385	38.241	22.719	11.18	1.4	7	17	0.4	38	55	27	2020-03-08-14-36-53	36	43	Template reloc
2020	3	9	7	53	4.615	38.0621	22.8736	8.66	1.5	3	10	0.08	33	62	27	2020-03-09-07-53-04	23	29	Template reloc
2020	3	11	14	24	9.575	38.1469	22.7226	13.94	2.6	6	11	0.27	129	23	81	2020-03-11-14-24-08	37	44	Template reloc
2020	3	12	0	55	30.052	38.1531	22.6785	11.59	1.7	8	9	0.36	73	27	48	2020-03-12-00-55-31	35	42	Template reloc
2020	3	13	0	16	56.319	38.1573	22.59	8.51	1.1	10	10	0.37	26	76	19	2020-03-13-00-16-48	38	45	Template reloc
2020	3	15	2	45	8.917	38.1078	22.7144	9.42	1.2	8	7	0.49	24	56	18	2020-03-15-02-44-40	39	46	Template reloc
2020	3	16	15	58	47.997	38.3535	22.6923	28.62	1.6	7	15	0.49	32	72	23	2020-03-16-15-58-47	40	47	Template reloc
2020	3	16	21	21	17.68	38.1746	22.7206	8.95	1.1	6	12	0.32	23	49	18	2020-03-16-21-21-17	41	48	Template reloc
2020	3	18	7	59	23.959	38.1867	22.7344	12.22	1.5	6	15	0.22	41	36	28	2020-03-18-07-59-23	41	48	Template reloc
2020	3	19	21	46	46.849	38.2014	22.5607	16.51	1.4	10	16	0.17	27	61	19	2020-03-19-21-46-47	42	49	Template reloc
2020	3	20	1	36	31.947	38.0272	22.9624	8.06	2.5	1	4	0.23	79	54	47	2020-03-20-01-36-14	34	50	Template reloc
2020	3	21	23	25	27.043	38.1743	22.6591	13.27	2.3	9	11	0.24	88	36	60	2020-03-21-23-25-28	43	51	Template reloc
2020	3	22	8	39	16.09	38.0412	22.9745	6.12	1.4	1	4	0.3	34	55	29	2020-03-22-08-39-16	34	52	Template reloc
2020	3	23	16	19	43.872	38.2078	22.6178	16.27	2.3	9	15	0.31	110	44	64	2020-03-23-16-19-44	16	22	Template reloc
2020	3	23	21	40	26.691	38.2152	22.6185	5.51	1.4	10	15	0.25	63	45	42	2020-03-23-21-40-26	16	22	Template reloc
2020	3	23	23	33	0.949997	38.2152	22.6152	15.03	1.6	9	16	0.36	44	48	32	2020-03-23-23-33-00	16	22	Template reloc
2020	3	24	13	39	21.691	38.2272	22.5916	23.12	1.5	10	15	0.41	34	49	23	2020-03-24-13-39-21	44	34	Template reloc
2020	3	24	23	34	55.309	38.1896	22.6112	22.86	1.4	10	14	0.33	38	48	26	2020-03-24-23-34-55	16	22	Template reloc
2020	3	25	23	12	12.266	38.2571	22.7171	16.63	1.8	7	16	0.29	36	61	24	2020-03-25-23-12-12	45	53	Template reloc
2020	3	26	1	41	57.758	38.2614	22.7197	17.78	1.8	7	16	0.31	38	60	25	2020-03-26-01-41-58	45	53	Template reloc
2020	3	27	4	29	38.747	38.1715	22.604	16.76	1.6	9	12	0.31	24	85	19	2020-03-27-04-29-40	46	23	Template reloc
2020	3	27	15	12	57.859	38.168	22.7269	2.81	1.8	6	12	0.12	35	36	23	2020-03-27-15-12-58	47	54	Template reloc
2020	3	27	15	17	8.395	38.0836	22.7559	12.29	1.7	4	8	0.54	23	65	17	2020-03-27-15-17-08	48	54	Template reloc
2020	3	28	5	16	32.73	38.127	22.7357	13	1.5	8	10	0.21	29	40	22	2020-03-28-05-16-08	48	54	Template reloc
2020	3	30	7	7	4.877	38.2511	22.6986	4.54	1.4	7	19	0.6	31	57	21	2020-03-30-07-07-04	49	55	Template reloc
2020	3	31	6	56	29.802	38.0197	22.8408	15.93	1.3	3	8	0.13	26	66	18	2020-03-31-06-56-33	50	56	Template reloc
2020	4	3	5	7	55.864	38.1906	22.7384	21.96	1.6	6	16	0.21	23	73	17	2020-04-03-05-07-55	51	57	Template reloc
2020	4	3	9	15	53.547	38.0306	22.9651	6.84	2	1	3	0.25	52	36	43	2020-04-03-09-15-41	34	50	Template reloc
2020	4	3	9	36	52.423	38.0249	22.9602	6.75	1.6	1	2	0.34	40	53	33	2020-04-03-09-36-54	34	50	Template reloc
2020	4	4	1	45	17.501	38.0427	22.9601	6.21	1.4	1	3	0.16	37	63	24	2020-04-04-01-45-18	34	50	Template reloc
2020	4	5	2	42	12.695	38.0345	22.9682	6.63	2.3	1	4	0.4	63	54	45	2020-04-05-02-42-13	34	50	Template reloc
2020	4	5	13	12	57.876	38.1979	22.5602	29.13	1.6	10	16	0.89	38	45	27	2020-04-05-13-12-57	52	58	Template reloc
2020	4	9	20	45	48.855	38.034	22.9858	5.99	1.8	1	4	0.53	54	61	33	2020-04-09-20-45-49	34	59	Template reloc
2020	4	10	9	26	31.006	38.1762	22.7401	15.65	1.6	6	14	0.35	43	35	32	2020-04-10-09-26-30	41	48	Template reloc
2020	4	11	21	24	0.379997	38.1722	22.5698	7.76	1	10	11	0.26	25	73	20	2020-04-11-21-24-00	53	60	Template reloc
2020	4	12	11	30	9.389	38.1533	22.6447	19.97	1.6	9	8	0.16	22	52	17	2020-04-12-11-30-02	34	50	Template loc
2020	4	12	12	2	37.21	38.0499	22.9741	7.97	3.2	1	5	0.37	135	48	78	2020-04-12-12-02-38	34	50	Template reloc
2020	4	12	15	28	43.01	38.0214	23.0079	4.97	1.3	1	4	0.46	54	55	35	2020-04-12-15-28-43	34	52	Template reloc
2020	4	13	13	58	36.67	38.0374	22.9603	6.56	1.8	1	2	0.37	56	62	34	2020-04-13-13-58-38	34	52	Template reloc
2020	4	14	4	38	23.01	38.0298	22.9808	6.68	3.2	1	4	0.39	113	48	75	2020-04-14-04-38-24	34	50	Template reloc
2020	4	14	4	53	28.114	38.0342	22.964	6.29	1.6	1	3	0.33	44	54	31	2020-04-14-04-53-28	34	50	Template reloc
2020	4	16	5	21	6.987	38.2429	22.7226	19.26	1.8	7	16	0.11	30	56	22	2020-04-16-05-20-49	18	24	Template reloc
2020	4	17	2	35	13.758	38.1308	22.7053	11.97	1.5	8	8	0.14	47	36	31	2020-04-17-02-35-14	54	61	Template reloc
2020	4	17	17	17	43.641	38.1299	22.6108	11.59	1.9	9	7	0.34	51	34	31	2020-04-17-17-17-44	55	62	Template reloc
2020	4	17	22	59	58.223	38.1153	22.6177	12.55	0.9	9	3	0.4	29	90	20	2020-04-17-22-59-58	55	62	Template reloc
2020	4	17	23	1	55.201	38.1411	22.613	11.82	1.3	9	7	0.35	55	35	33	2020-04-17-23-01-55	55	62	Template reloc
2020	4	18	0	39	35.963	38.1397	22.6125	10.6	1.6	9	7	0.27	57	30	42	2020-04-18-00-39-37	56	63	Template reloc
2020	4	18	13	25	34.42	38.1716	22.5811	18.35	1.2	9	12	0.48	27	60	20	2020-04-18-13-25-34	57	64	Template reloc
2020	4	18	14	17	24.565	38.111	22.7066	15.96	1.2	8	7	0.17	24	69	17	2020-04-18-14-17-27	58	65	Template reloc
2020	4	20	6	25	52.739	38.0834	22.9578	4.66	1.1	1	7	0.42	40	53	35	2020-04-20-06-25-53	59	66	Template reloc
2020	4	20	16	36	32.21	38.1899	22.5415	7.63	1.3	10	14	0.32	45	68	30	2020-04-20-16-36-32	60	67	Template reloc
2020	4	21	3	28	12.243	38.0085	22.9701	5.51	1.6	1	2	0.53	46	57	30	2020-04-21-03-28-13	34	50	Template reloc
2020	4	21	15	58	50.625	38.0294	22.9829	6.1	1.9	1	1	0.47	71	58	43	2020-04-21-15-58-52	34	68	Template reloc
2020	4	21	21	47	44.668	38.0127	22.9802	5.38	1.9	1	1	0.5	28	60	20	2020-04-21-21-47-45	61	69	Template reloc
2020	4	21	23	59	34.424	38.2826	22.7324	4.15	2.5	7	29	0.39	50	42	37	2020-04-21-23-59-35	62	70	Template reloc
2020	4	22	4	39	25.407	38.0115	22.9747	22.4	2	0	2	0.69	36	57	26	2020-04-22-04-39-24	63	71	Template loc
2020	4	22	20	36	30.306	38.0297	22.9875	5.63	1.9	1	3	0.41	45	61	32	2020-04-22-20-36-31	64	72	Template reloc
2020	4	23	6	14	58.86	38.0391	22.9988	3.96	3	1	5	0.47	83	55	57	2020-04-23-06-14-59	65	73	Template reloc
2020	4	23	6	19	28.91	38.0365	22.9858	5.97	2.3	1	4	0.26	65	48	42	2020-04-23-06-19-30	65	73	Template reloc
2020	4	24	3	15	33.706	38.1753	22.5443	12.16	1.1	10	14	0.12	25	75	18	2020-04-24-03-15-25	66	74	Template reloc
2020	4	24	18	58	42.991	38.024	23.001	3.76	1.6	1	4	0.52	26	74	19	2020-04-24-18-58-43	34	68	Template reloc
2020	4	24	22	13	17.82	38.0263	22.9925	7.07	1.3	1	3	0.36	28	59	21	2020-04-24-22-13-17	63	75	Template reloc
2020	4	25	0	44	20.655	38.0037	22.9487	10.81	1.4	1	2	0.33	25	51	22	2020-04-25-00-44-20	34	76	Template reloc
2020	4	25	12	3	7.734	38.0238	22.9947	6.94	3.1	1	4	0.31	102	37	60	2020-04-25-12-03-08	67	72	Template reloc
2020	4	25	18	45	54.611	38.0209	22.9967	5.33	1.5	1	3	0.6	47	59	30	2020-04-25-18-45-56	65	73	Template reloc
2020	4	26	20	24	28.612	38.0305	22.9753	5.48	1.9	1	3	0.45	55	36	35	2020-04-26-20-24-30	68	77	Template reloc
2020	4	27	0	2	16.545	38.0628	22.8281	11.67	1.8	3	8	0.47	81	32	51	2020-04-27-00-02-17	31	38	Template reloc
2020	4	27	1	18	7.367	38.188	22.7032	5.97	1.2	6	13	0.21	27	38	26	2020-04-27-01-18-06	69	78	Template reloc
2020	4	27	4	53	49.969	38.0179	22.9501	4.52	2.1	1	1	0.33	73	35	50	2020-04-27-04-53-51	34	79	Template reloc
2020	4	27	8	42	16.754	38.1569	22.6187	12.68	1.7	9	8	0.29	36	65	24	2020-04-27-08-42-18	70	80	Template reloc
2020	4	27	11	20	38.604	38.1614	22.6161	12.33	1.6	9	9	0.06	23	80	17	2020-04-27-11-20-38	70	80	Template reloc
2020	4	28	2	43	29.716	38.0525	22.9061	11.36	1	2	7	0.34	27	66	21	2020-04-28-02-43-29	71	30	Template reloc
2020	4	28	16	15	40.961	38.1598	22.6219	13.36	1.9	9	10	0.43	59	54	38	2020-04-28-16-15-42	72	81	Template reloc
2020	4	29	0	32	4.204	38.1408	22.8801	14.63	1.4	2	13	0.38	45	52	38	2020-04-29-00-32-04	73	82	Template reloc
2020	4	30	20	20	16.848	38.1105	22.7008	9.69	1.7	8	6	0.14	35	46	25	2020-04-30-20-20-17	74	83	Template reloc
2020	5	3	0	24	23.93	38.1452	22.6437	11.94	1.4	9	6	0.41	46	51	29	2020-05-03-00-24-24	75	84	Template reloc
2020	5	3	0	34	29.664	38.2446	22.7361	2.39	1.6	7	14	0.35	27	65	19	2020-05-03-00-34-30	76	85	Template reloc
2020	5	3	0	58	39.474	38.1647	22.6092	12.96	1.6	9	11	0.27	59	47	46	2020-05-03-00-58-39	77	86	Template reloc
2020	5	3	4	55	30.913	38.1458	22.6481	12.14	2	9	6	0.31	45	35	30	2020-05-03-04-55-31	75	84	Template reloc
2020	5	3	9	26	15.226	38.143	22.6471	12.59	1.8	9	7	0.51	85	32	52	2020-05-03-09-26-16	75	84	Template reloc
2020	5	3	9	56	4.329	38.026	22.961	4.87	1.2	1	2	0.3	40	54	28	2020-05-03-09-56-04	34	87	Template reloc
2020	5	4	5	28	58	38.0222	22.9843	11.12	1.7	1	2	0.61	32	80	22	2020-05-04-05-28-29	34	52	Template reloc
2020	5	4	6	24	5.04	38.1359	22.604	9.94	1.7	9	4	0.62	40	83	25	2020-05-04-06-24-06	78	88	Template reloc
2020	5	4	12	59	12.18	38.0786	23.126	3.12	1.5	0	16	1.1	46	63	30	2020-05-04-12-59-12	34	87	Template loc
2020	5	4	17	23	28.153	38.1708	22.6295	13.06	1.9	9	10	0.26	43	35	26	2020-05-04-17-23-29	79	89	Template reloc
2020	5	4	17	39	59.632	38.1702	22.6267	13.07	2.3	9	10	0.28	57	36	34	2020-05-04-17-40-00	79	89	Template reloc
2020	5	4	17	44	16.708	38.1721	22.6286	13.21	2.3	9	10	0.27	67	36	44	2020-05-04-17-44-17	79	89	Template reloc
2020	5	4	20	1	56.849	38.1661	22.6261	13.18	1.6	9	10	0.17	36	35	25	2020-05-04-20-01-57	79	89	Template reloc
2020	5	4	21	18	56.553	38.1682	22.6302	12.89	1.6	9	10	0.16	33	36	22	2020-05-04-21-18-57	80	81	Template reloc
2020	5	4	22	56	27.026	38.1658	22.6305	8.41	1.2	9	10	0.22	33	49	22	2020-05-04-22-56-27	79	89	Template reloc
2020	5	5	1	53	13.812	38.1357	22.6072	9.56	1.7	9	7	0.31	51	35	31	2020-05-05-01-53-14	78	88	Template reloc
2020	5	5	15	58	56.651	38.0358	22.9585	5.61	1.9	1	1	0.35	46	53	28	2020-05-05-15-58-58	34	87	Template reloc
2020	5	5	19	22	8.786	38.2103	22.6162	5.66	1.2	10	15	0.11	32	45	22	2020-05-05-19-22-08	16	22	Template reloc
2020	5	5	23	27	20.661	38.1118	22.7782	5.83	1.1	4	10	0.35	32	49	24	2020-05-05-23-27-21	81	90	Template reloc
2020	5	5	23	40	29.473	38.0905	22.7865	9.28	1.1	4	11	0.26	21	50	18	2020-05-05-23-40-29	81	90	Template reloc
2020	5	6	0	34	59.52	38.1665	22.6277	13.6	1.6	9	11	0.31	60	47	44	2020-05-06-00-34-59	79	89	Template reloc
2020	5	6	1	7	30.835	38.1619	22.6289	11.96	1.7	9	9	0.17	36	52	27	2020-05-06-01-07-30	82	91	Template reloc
2020	5	6	7	8	44.461	38.0483	22.9521	4.74	1.7	1	2	0.7	37	53	29	2020-05-06-07-08-46	34	92	Template reloc
2020	5	6	11	13	32.628	38.0553	22.9369	4.48	1.4	1	4	0.05	25	52	25	2020-05-06-11-13-32	34	87	Template reloc
2020	5	6	17	50	58.194	38.0355	22.9439	5.88	1.9	1	3	0.27	57	51	38	2020-05-06-17-51-00	83	93	Template reloc
2020	5	6	22	46	45.942	38.1349	22.7483	13.34	1.6	8	11	0.4	29	76	20	2020-05-06-22-46-46	84	94	Template reloc
2020	5	7	2	14	26.967	38.0366	22.9449	5.75	1.9	1	2	0.44	61	52	38	2020-05-07-02-14-28	34	87	Template reloc
2020	5	7	8	36	13.774	38.1702	22.6291	11.78	2	9	10	0.16	33	50	21	2020-05-07-08-36-14	82	91	Template reloc
2020	5	7	11	4	30.09	38.0443	22.8917	14.74	1.7	3	3	0.29	26	65	20	2020-05-07-11-04-29	34	95	Template reloc
2020	5	7	20	44	42.84	38.0332	22.9382	4.95	1.8	1	3	0.35	62	51	39	2020-05-07-20-44-44	85	92	Template reloc
2020	5	7	21	52	30.36	38.0425	22.9931	6.11	1.6	1	6	0.27	38	57	25	2020-05-07-21-52-30	63	71	Template reloc
2020	5	8	0	28	16.149	38.1283	22.621	2.89	1.3	9	6	0.18	20	66	20	2020-05-08-00-28-16	86	84	Template reloc
2020	5	8	20	40	23.846	38.0551	22.948	8.74	1.4	2	6	0.4	67	41	42	2020-05-08-20-40-24	34	96	Template reloc
2020	5	8	20	45	23.571	38.0404	22.9541	5.8	1.2	1	2	0.13	46	52	31	2020-05-08-20-45-23	34	87	Template reloc
2020	5	9	0	0	49.598	38.0459	22.9449	2.78	1.4	1	3	0.68	79	41	46	2020-05-09-00-00-51	83	97	Template reloc
2020	5	9	3	51	39.278	38.0396	22.9212	15.45	1.4	3	4	0.17	27	60	21	2020-05-09-03-51-39	83	98	Template reloc
2020	5	9	5	42	19.767	38.0248	22.9667	6.84	1.9	1	2	0.33	50	53	37	2020-05-09-05-42-20	34	52	Template reloc
2020	5	9	8	2	44.48	38.0109	22.9881	4.66	1.8	1	3	0.33	36	57	29	2020-05-09-08-02-44	34	52	Template reloc
2020	5	9	12	14	44.7	38.0274	22.9586	5.79	2.4	1	3	0.41	99	35	60	2020-05-09-12-14-45	34	41	Template reloc
2020	5	9	13	32	24.926	38.1345	22.684	15.46	1.9	8	7	0.27	47	33	30	2020-05-09-13-32-25	87	99	Template reloc
2020	5	9	21	51	5.388	38.0394	22.9351	5.25	1.1	1	3	0.24	25	62	20	2020-05-09-21-51-05	83	100	Template reloc
2020	5	10	1	14	49.564	38.0414	22.9386	5.31	1.7	1	3	0.43	39	61	31	2020-05-10-01-14-50	83	98	Template reloc
2020	5	10	16	47	16.693	38.1612	22.5788	8.62	1.2	10	9	0.33	47	72	34	2020-05-10-16-47-16	88	101	Template reloc
2020	5	10	23	40	52.296	38.0442	22.9751	21.53	1.5	0	2	0.47	28	63	25	2020-05-10-23-40-52	63	102	Template loc
2020	5	11	10	15	46.469	38.0101	22.9401	5.73	1.3	1	4	0.46	33	67	23	2020-05-11-10-15-47	83	97	Template reloc
2020	5	11	11	46	25.307	38.1776	22.5727	15.32	1.9	9	14	0.36	68	48	42	2020-05-11-11-46-25	57	64	Template reloc
2020	5	11	11	49	59.304	38.1849	22.5751	13.7	2.2	10	14	0.35	97	29	57	2020-05-11-11-49-59	57	64	Template reloc
2020	5	11	14	30	34.558	38.062	22.9393	7.02	1.5	2	4	0.47	61	34	38	2020-05-11-14-30-34	34	103	Template reloc
2020	5	11	21	41	24.656	38.1933	22.5711	5.62	1.9	10	14	0.47	32	64	21	2020-05-11-21-41-20	57	64	Template reloc
2020	5	12	1	36	52.337	38.0419	22.9542	5.12	2	1	2	0.33	69	48	45	2020-05-12-01-36-53	34	87	Template reloc
2020	5	12	2	38	54.132	38.033	22.9116	18.04	1.5	0	4	0.32	37	57	25	2020-05-12-02-38-54	89	104	Template loc
2020	5	12	7	58	40.554	38.0633	22.9487	4.9	1.7	1	5	0.43	31	65	31	2020-05-12-07-58-40	83	98	Template reloc
2020	5	12	14	58	7.948	38.0531	22.9366	7.14	1.8	2	4	0.5	73	52	46	2020-05-12-14-58-08	34	76	Template reloc
2020	5	12	15	19	22.616	38.004	23.0068	34.77	1.9	0	4	1.21	43	74	28	2020-05-12-15-19-22	83	98	Template loc
2020	5	13	0	10	41.531	38.188	22.578	13.13	2.5	10	14	0.26	110	23	74	2020-05-13-00-10-42	57	64	Template reloc
2020	5	13	0	31	53.901	38.0139	22.9701	5.43	1.7	1	1	0.84	74	35	50	2020-05-13-00-31-54	90	105	Template reloc
2020	5	13	1	1	53.5	38.1913	22.5795	10.97	1.4	10	14	0.38	60	63	40	2020-05-13-01-01-53	91	106	Template reloc
2020	5	13	1	24	49.534	38.0024	22.9882	13.59	1.7	1	2	0.19	45	53	45	2020-05-13-01-24-49	34	87	Template reloc
2020	5	13	2	2	4.14	38.0677	22.963	6.2	1.2	1	3	0.07	34	52	34	2020-05-13-02-02-04	34	103	Template reloc
2020	5	13	14	33	11.167	38.0214	22.945	8.64	1.6	1	5	0.16	32	74	23	2020-05-13-14-33-11	34	87	Template reloc
2020	5	14	11	5	16.871	38.0606	22.9378	6.92	1.6	2	5	0.39	74	33	45	2020-05-14-11-05-17	34	107	Template reloc
2020	5	14	15	50	8.797	38.1702	22.6042	17.26	1.2	9	11	0.19	26	65	19	2020-05-14-15-50-10	92	108	Template reloc
2020	5	14	21	14	14.265	38.0459	22.9449	5.48	1.4	1	2	0.11	33	60	24	2020-05-14-21-14-15	34	109	Template reloc
2020	5	15	1	51	56.113	38.0564	22.932	7.57	1.8	2	3	0.3	68	30	41	2020-05-15-01-51-57	34	110	Template reloc
2020	5	15	11	47	0.849998	38.0498	22.9791	11.13	1.6	1	3	0.29	74	35	45	2020-05-15-11-47-01	83	77	Template reloc
2020	5	15	13	13	55.495	38.0384	22.9804	5.9	1.2	1	4	0.52	47	54	31	2020-05-15-13-13-55	93	79	Template reloc
2020	5	15	14	3	14.904	38.023	23.0083	6.43	1.1	1	5	0.39	42	60	27	2020-05-15-14-03-15	94	111	Template reloc
2020	5	15	15	41	14.659	38.0632	22.9297	7.05	1.8	2	5	0.42	96	34	57	2020-05-15-15-41-15	34	107	Template reloc
2020	5	15	18	59	46.04	38.0251	23.0244	6.94	1.1	1	5	0.61	63	40	38	2020-05-15-18-59-46	63	71	Template reloc
2020	5	15	22	57	1.176	38.0581	22.9433	7.82	1.2	2	5	0.19	33	66	27	2020-05-15-22-57-01	34	112	Template reloc
2020	5	15	23	58	15.284	38.0462	22.945	5.57	1.4	1	5	0.94	43	61	29	2020-05-15-23-58-16	83	77	Template reloc
2020	5	16	8	0	31.002	38.168	22.6338	12.85	1.5	9	10	0.18	35	50	23	2020-05-16-08-00-31	95	113	Template reloc
2020	5	16	10	3	40.552	38.169	22.634	11.9	1.8	9	10	0.24	59	37	36	2020-05-16-10-03-39	95	113	Template reloc
2020	5	16	10	46	59.616	38.1731	22.6313	11.53	1.5	9	9	0.3	45	47	27	2020-05-16-10-46-59	95	113	Template reloc
2020	5	16	18	30	15.888	38.0473	22.936	7.39	1.7	1	3	0.47	77	39	47	2020-05-16-18-30-16	34	110	Template reloc
2020	5	16	19	57	0.157997	38.0283	22.9468	8.52	1.1	1	2	0.13	59	43	38	2020-05-16-19-57-00	34	107	Template reloc
2020	5	16	19	59	12.093	38.0689	22.9381	9.08	1.5	2	5	0.47	84	33	52	2020-05-16-19-59-13	34	103	Template reloc
2020	5	17	1	39	25.482	38.0461	22.9427	8.42	1.7	1	4	0.35	54	64	34	2020-05-17-01-39-26	96	114	Template reloc
2020	5	18	6	5	3.668	38.0622	22.9382	7.68	2.3	2	5	0.41	53	66	38	2020-05-18-06-05-04	34	115	Template reloc
2020	5	18	8	23	46.669	38.0599	22.9398	7.91	1.7	2	5	0.48	47	53	36	2020-05-18-08-23-46	34	96	Template reloc
2020	5	18	8	34	13.15	38.0447	22.9478	8.35	2.8	1	4	0.29	101	34	69	2020-05-18-08-34-14	34	87	Template reloc
2020	5	18	9	4	12.628	38.1837	22.5678	12.97	2.2	10	13	0.34	86	40	61	2020-05-18-09-04-12	97	116	Template reloc
2020	5	18	10	50	0.656998	38.0542	22.9437	15.32	1.6	2	5	0.39	33	65	23	2020-05-18-10-50-00	34	87	Template reloc
2020	5	18	12	28	17.189	38.2164	22.9385	5.97	1.4	0	6	0.14	21	92	17	2020-05-18-12-28-16	30	37	Template loc
2020	5	18	14	59	28.557	38.3627	22.6893	28.92	1.3	7	15	0.65	33	71	23	2020-05-18-14-59-16	98	47	Template reloc
2020	5	18	18	35	30.279	38.0521	22.935	4.05	1.4	1	4	0.5	32	62	23	2020-05-18-18-35-30	83	77	Template reloc
2020	5	18	20	36	51.242	38.0513	22.9442	6.1	1.3	1	4	0.32	32	63	25	2020-05-18-20-36-52	34	109	Template reloc
2020	5	19	4	49	30.168	38.0509	22.9393	8.06	2.4	2	4	0.35	71	34	51	2020-05-19-04-49-31	34	96	Template reloc
2020	5	19	5	59	16.408	38.0686	22.9353	7.07	1.9	2	6	0.21	33	65	25	2020-05-19-05-59-16	34	96	Template reloc
2020	5	19	7	37	8.621	38.0413	22.9271	5.83	1.8	1	4	0.23	60	38	47	2020-05-19-07-37-09	83	117	Template reloc
2020	5	19	15	26	14.244	38.1585	22.702	13.31	2.3	8	10	0.14	54	33	33	2020-05-19-15-26-15	99	118	Template reloc
2020	5	19	18	24	3.777	38.0446	22.9415	7.92	2.3	1	4	0.27	43	60	27	2020-05-19-18-24-04	34	110	Template reloc
2020	5	19	23	34	32.5	38.0769	22.9218	6.71	1.4	2	7	0.5	42	52	29	2020-05-19-23-34-33	34	119	Template reloc
2020	5	20	2	45	41.777	38.1057	22.7916	11.25	2.4	4	10	0.28	95	24	66	2020-05-20-02-45-42	100	120	Template reloc
2020	5	20	2	58	24.436	38.0865	22.7561	3.7	1.5	4	10	0.32	31	58	22	2020-05-20-02-57-39	100	120	Template reloc
2020	5	20	9	7	21.892	38.0416	22.9409	4.89	1.6	1	3	0.32	38	58	25	2020-05-20-09-07-22	34	107	Template reloc
2020	5	20	16	19	23.932	38.0591	22.945	8.45	2.3	2	4	0.4	74	34	52	2020-05-20-16-19-25	34	96	Template reloc
2020	5	20	19	34	42.482	38.0292	22.9568	5.64	2	1	2	0.23	44	52	30	2020-05-20-19-34-43	34	87	Template reloc
2020	5	20	22	40	33.13	38.0703	22.9323	5.51	1.9	2	6	0.35	39	52	28	2020-05-20-22-40-34	34	103	Template reloc
2020	5	21	13	35	51.632	38.1656	22.6046	25.13	1.7	9	10	0.58	34	57	25	2020-05-21-13-35-52	101	121	Template loc
2020	5	21	17	47	40.342	38.0698	22.9292	7.74	1.8	2	7	0.32	39	68	30	2020-05-21-17-47-41	34	119	Template reloc
2020	5	21	19	15	35.044	38.0857	22.9115	5.28	1.6	2	7	0.24	30	66	22	2020-05-21-19-15-35	34	122	Template reloc
2020	5	21	20	41	0.821999	38.0526	22.9432	6.88	2.1	2	5	0.47	31	65	25	2020-05-21-20-41-00	34	103	Template reloc
2020	5	21	20	42	13.774	38.0464	22.9438	7.23	1.6	2	3	0.28	30	65	22	2020-05-21-20-42-14	34	103	Template reloc
2020	5	21	22	13	29.572	38.0776	22.9291	5.62	1.7	2	7	0.15	29	66	23	2020-05-21-22-13-29	34	119	Template reloc
2020	5	22	15	32	37.552	38.0494	22.9506	5.7	1.8	1	4	0.29	63	52	38	2020-05-22-15-32-38	34	123	Template reloc
2020	5	22	16	54	36.05	38.1012	22.9641	7.26	1.5	0	10	0.36	32	56	23	2020-05-22-16-54-36	34	123	Template loc
2020	5	22	18	58	33.064	38.0456	22.9417	8.07	2.7	1	4	0.29	67	52	39	2020-05-22-18-58-33	34	76	Template reloc
2020	5	22	22	11	23.949	38.0717	22.9362	7.59	1.7	2	7	0.29	56	35	41	2020-05-22-22-11-25	34	115	Template reloc
2020	5	23	0	27	46.07	38.0314	22.9979	5.78	1.2	1	4	0.83	41	54	30	2020-05-23-00-27-47	102	124	Template reloc
2020	5	23	2	13	42.519	38.0734	22.9095	5.35	1.4	2	8	0.54	36	49	27	2020-05-23-02-13-42	34	69	Template reloc
2020	5	23	3	41	58.76	38.1707	22.6451	9.26	1	9	10	0.13	24	85	18	2020-05-23-03-41-58	101	125	Template reloc
2020	5	23	15	8	57.424	38.0478	22.9524	5.81	1.5	1	3	0.16	26	65	20	2020-05-23-15-08-57	34	87	Template reloc
2020	5	23	21	32	47.038	38.0216	22.9435	5.03	1.5	1	2	0.5	37	52	29	2020-05-23-21-32-47	85	92	Template reloc
2020	5	24	2	51	45.607	38.0723	22.9323	8.1	1.8	2	7	0.35	83	32	57	2020-05-24-02-51-46	34	119	Template reloc
2020	5	24	13	21	49.286	38.016	22.9071	10.27	1.8	1	5	0.52	37	66	25	2020-05-24-13-21-49	34	110	Template loc
2020	5	24	14	25	6.975	38.069	22.9171	1.1	1.8	2	6	0.65	40	51	26	2020-05-24-14-25-08	83	97	Template reloc
2020	5	24	16	10	33.097	38.1323	22.7211	12.8	1.6	8	10	0.09	21	73	16	2020-05-24-16-10-33	103	126	Template reloc
2020	5	24	18	51	55.177	38.0646	22.9456	4.08	1.6	1	5	0.15	34	65	23	2020-05-24-18-51-53	34	109	Template reloc
2020	5	24	19	12	29.281	38.1068	22.9041	4.04	1.1	2	12	0.38	22	72	17	2020-05-24-19-12-28	34	119	Template reloc
2020	5	24	20	8	35.491	38.0755	22.9239	5.97	1.6	2	7	0.35	33	65	24	2020-05-24-20-08-36	34	69	Template reloc
2020	5	24	21	33	7.462	38.0967	22.8974	6.62	1.5	2	11	0.57	23	70	17	2020-05-24-21-33-07	104	127	Template reloc
2020	5	25	11	19	35.021	38.2321	22.9306	45.62	1.5	0	5	0.28	27	88	20	2020-05-25-11-19-36	105	128	Template loc
2020	5	25	16	56	52.366	38.07	22.9208	6.63	1.9	2	7	0.77	90	51	55	2020-05-25-16-56-53	34	110	Template reloc
2020	5	25	20	12	37.194	38.0642	22.935	9.09	1.3	2	6	0.26	21	69	16	2020-05-25-20-12-35	34	119	Template reloc
2020	5	26	8	12	34.8	38.1513	22.6147	11.99	1.7	9	9	0.3	21	78	17	2020-05-26-08-12-34	106	129	Template reloc
2020	5	26	8	42	36.929	38.1641	22.6136	10.69	1.3	9	10	0.21	22	77	17	2020-05-26-08-42-11	106	129	Template reloc
2020	5	26	20	10	3.709	38.041	22.9558	4.78	1.3	1	2	0.26	18	77	15	2020-05-26-20-10-03	34	79	Template loc
2020	5	27	5	40	35.985	38.1512	22.692	14.83	1.9	8	9	0.46	41	32	28	2020-05-27-05-40-36	107	130	Template reloc
2020	5	27	17	5	39.527	38.075	22.9331	8.22	2.1	2	7	0.4	56	69	36	2020-05-27-17-05-40	34	119	Template reloc
2020	5	28	8	25	17.522	38.0596	22.9352	7.71	2.3	2	4	0.59	81	52	47	2020-05-28-08-25-19	34	92	Template reloc
2020	5	28	18	21	21.278	38.07	22.9158	6.67	1.9	2	6	0.4	46	51	30	2020-05-28-18-21-22	108	131	Template reloc
2020	5	29	1	56	53.628	38.0738	22.908	7.5	1.4	2	8	0.17	44	51	37	2020-05-29-01-56-53	109	132	Template reloc
2020	5	29	5	3	9.408	38.0146	22.9657	17.94	1.6	1	1	0.54	27	53	27	2020-05-29-05-03-09	110	133	Template reloc
2020	5	29	9	33	8.419	38.0827	22.918	6.6	1.8	2	7	0.31	30	67	22	2020-05-29-09-33-09	34	119	Template reloc
2020	5	29	15	37	44.016	38.0867	22.9184	9.84	1.6	2	9	0.73	26	68	20	2020-05-29-15-37-45	34	134	Template reloc
2020	5	30	1	11	44.291	38.0634	22.9125	9.92	1.3	2	7	0.3	40	65	26	2020-05-30-01-11-44	111	122	Template reloc
2020	5	30	3	4	55.965	38.0626	22.9472	8.26	1.4	2	5	0.26	40	66	27	2020-05-30-03-04-56	34	112	Template reloc
2020	5	30	6	33	16.846	38.0542	22.9423	7.88	2.2	2	5	0.4	80	36	57	2020-05-30-06-33-18	34	110	Template reloc
2020	5	30	12	33	16.234	38.0645	22.9208	10.17	3.2	2	6	0.48	133	32	75	2020-05-30-12-33-17	109	132	Template reloc
2020	5	30	13	3	55.637	38.0431	22.9382	8.18	1.6	1	2	0.82	42	53	28	2020-05-30-13-03-30	34	135	Template reloc
2020	5	30	13	42	10.013	38.0789	22.9003	7.75	1.7	2	9	0.24	44	51	30	2020-05-30-13-42-10	112	136	Template reloc
2020	5	30	17	56	4.304	38.0665	22.9246	6.65	1.5	2	6	0.27	23	65	17	2020-05-30-17-56-05	34	110	Template reloc
2020	5	30	19	38	59.74	38.0049	22.992	8.49	1.2	1	2	0.19	21	80	16	2020-05-30-19-38-39	63	71	Template reloc
2020	5	31	0	24	28.134	38.0997	22.9049	3.82	1.4	2	9	0.56	53	50	42	2020-05-31-00-24-28	112	136	Template reloc
2020	5	31	8	46	51.317	38.0443	22.9361	7.86	1.6	1	4	0.37	38	52	33	2020-05-31-08-46-51	113	137	Template reloc
2020	5	31	9	8	44.502	38.1061	22.9667	16.17	1.5	1	9	0.55	38	73	30	2020-05-31-09-08-44	113	137	Template loc
2020	5	31	9	22	21.97	38.0605	22.9038	2.09	1.4	2	7	0.54	40	51	33	2020-05-31-09-22-22	113	137	Template reloc
2020	5	31	15	41	10.52	38.0332	22.9425	8.07	2	1	3	0.33	72	52	47	2020-05-31-15-41-11	34	135	Template reloc
2020	5	31	22	27	12.74	38.1518	22.6641	16.14	1.6	8	9	0.36	32	35	22	2020-05-31-22-27-12	114	138	Template reloc
2020	6	1	5	2	56.683	38.0714	22.9008	9.55	2.4	2	8	0.62	86	25	50	2020-06-01-05-02-57	115	139	Template reloc
2020	6	1	12	46	4.186	38.2055	22.9229	5.05	1.7	0	7	0.4	21	89	18	2020-06-01-12-46-01	30	37	Template loc
2020	6	1	15	28	3.72	38.0197	23.0258	7.62	1.9	1	6	0.4	56	55	36	2020-06-01-15-28-04	63	71	Template reloc
2020	6	2	0	19	42.387	38.0529	22.9397	7.55	1.8	2	4	0.4	83	34	58	2020-06-02-00-19-43	34	87	Template reloc
2020	6	2	1	29	57.768	38.0567	22.8884	5.87	1.5	2	7	0.43	58	30	44	2020-06-02-01-29-58	116	140	Template reloc
2020	6	2	8	50	41.587	38.0511	22.9286	3.51	1.7	1	4	0.47	52	54	44	2020-06-02-08-50-42	83	77	Template reloc
2020	6	2	13	9	27.07	38.1774	22.6398	13.07	2.1	9	13	0.62	91	37	53	2020-06-02-13-09-28	114	138	Template reloc
2020	6	2	17	37	23.944	38.0844	22.6508	20.57	1.4	8	3	0.6	38	35	25	2020-06-02-17-37-23	114	138	Template reloc
2020	6	2	23	18	31.664	38.1769	22.6385	12.91	2.9	9	11	0.35	111	28	76	2020-06-02-23-18-32	114	138	Template reloc
2020	6	3	1	11	29.897	38.0113	22.6827	10.95	1.4	0	4	0.25	27	61	22	2020-06-03-01-11-30	117	141	Template loc
2020	6	3	13	29	6.776	38.1731	22.641	12.94	1.9	9	10	0.2	59	41	38	2020-06-03-13-29-07	101	125	Template reloc
2020	6	4	2	42	44.364	38.0586	22.9436	4.58	1.1	1	4	0.46	32	63	23	2020-06-04-02-42-43	118	93	Template reloc
2020	6	4	20	11	41.502	38.0414	22.8142	12.37	1.3	5	6	0.47	29	55	22	2020-06-04-20-11-42	119	142	Template reloc
2020	6	6	21	39	36.474	38.1589	22.6878	13.64	1.8	8	12	0.23	39	50	30	2020-06-06-21-39-37	120	143	Template reloc
2020	6	7	16	32	55.702	38.0984	22.9672	20.89	1.6	0	8	0.47	33	72	25	2020-06-07-16-32-55	121	144	Template loc
2020	6	7	20	33	4.726	38.0952	22.9189	5.61	1.5	2	11	0.24	24	70	18	2020-06-07-20-33-05	34	145	Template reloc
2020	6	7	22	52	2.462	38.0454	22.8796	16.4	1.6	3	8	0.38	32	63	26	2020-06-07-22-51-58	122	146	Template reloc
2020	6	8	0	33	46.64	38.0573	22.8698	11.39	1.3	3	9	0.48	35	49	27	2020-06-08-00-33-46	122	146	Template reloc
2020	6	8	9	6	25.725	38.0636	22.8511	13.03	1.4	3	12	0.42	19	71	16	2020-06-08-09-06-26	34	145	Template reloc
2020	6	8	18	37	22.258	38.0366	22.9396	8.27	2	1	4	0.38	75	48	50	2020-06-08-18-37-23	34	147	Template reloc
2020	6	9	12	48	27.103	38.1701	22.941	30.25	1.3	0	11	0.15	27	82	20	2020-06-09-12-48-23	30	37	Template loc
2020	6	9	22	29	39.678	38.1004	22.9154	8.13	1.6	2	10	0.61	39	46	25	2020-06-09-22-29-38	34	148	Template reloc
2020	6	10	16	13	24.462	38.0785	22.8922	12.9	2.5	3	9	0.35	97	31	70	2020-06-10-16-13-25	123	149	Template reloc
2020	6	10	16	18	2.027	38.0789	22.8993	12.48	2.1	3	9	0.57	87	32	53	2020-06-10-16-18-02	123	149	Template reloc
2020	6	10	18	37	51.671	38.0877	22.882	12.17	1.8	3	10	0.37	72	43	47	2020-06-10-18-37-52	124	150	Template reloc
2020	6	13	20	7	2.281	38.0927	22.9137	8.45	2.2	2	10	0.21	55	69	40	2020-06-13-20-07-03	34	148	Template reloc
2020	6	13	22	27	42.686	38.1895	22.7551	8.85	2.3	6	15	0.57	85	30	56	2020-06-13-22-27-43	125	151	Template reloc
2020	6	14	2	20	33.195	38.095	22.9217	9.03	1.5	2	10	0.47	46	53	36	2020-06-14-02-20-33	34	134	Template reloc
2020	6	15	12	15	59.232	38.1039	22.8991	6.11	1.8	2	10	0.22	50	40	32	2020-06-15-12-15-59	34	145	Template reloc
2020	6	15	21	33	32.764	38.0596	22.9045	7.93	2	2	6	0.25	56	51	39	2020-06-15-21-33-34	126	152	Template reloc
2020	6	18	2	19	59.465	38.0652	22.8913	5.63	1.5	2	10	0.38	23	65	17	2020-06-18-02-20-00	34	153	Template reloc
2020	6	18	2	54	48.67	38.063	23.084	4.94	1.6	0	12	0.22	39	66	25	2020-06-18-02-54-49	63	71	Template loc
2020	6	18	12	15	30.932	37.9825	22.9189	31.77	1.8	0	4	0.64	27	58	19	2020-06-18-12-15-30	127	154	Template loc
2020	6	18	23	8	11.414	38.1301	22.7218	4.57	1.4	8	9	0.4	29	48	20	2020-06-18-23-08-12	128	155	Template reloc
2020	6	19	5	56	59.885	38.0394	22.8805	8.13	1.2	3	8	0.16	21	61	17	2020-06-19-05-56-59	129	156	Template reloc
2020	6	20	1	59	36.779	38.0381	22.9403	8.8	2.1	1	3	0.29	70	62	42	2020-06-20-01-59-38	34	110	Template reloc
2020	6	22	7	57	9.431	38.0711	22.8581	17.94	1.6	3	10	0.42	46	65	30	2020-06-22-07-57-09	130	157	Template reloc
2020	6	22	17	53	28.235	38.0393	22.937	8.41	2.6	1	4	0.27	71	39	51	2020-06-22-17-53-29	34	147	Template reloc
2020	6	22	19	9	49.199	38.0619	22.9361	6.64	1.1	2	3	0.38	53	51	34	2020-06-22-19-09-49	34	147	Template reloc
2020	6	23	10	32	52.141	38.0153	22.9657	15.96	1.5	0	1	0.19	27	81	19	2020-06-23-10-33-12	34	153	Template loc
2020	6	23	13	2	22.161	38.0418	22.9383	8.4	3.7	1	4	0.45	112	42	70	2020-06-23-13-02-23	34	110	Template reloc
2020	6	23	20	14	30.556	38.0587	22.8869	6.02	1.1	2	10	0.41	33	62	25	2020-06-23-20-14-31	131	117	Template reloc
2020	6	23	23	38	50.662	38.1871	22.6048	16.04	1.6	9	14	0.59	39	53	25	2020-06-23-23-38-50	132	158	Template reloc
2020	6	24	6	3	23.944	38.0794	22.8963	8.46	1.7	2	8	0.3	40	66	26	2020-06-24-06-03-24	115	139	Template reloc
2020	6	25	7	51	45.419	38.2591	22.7277	15.42	1.2	7	16	0.17	22	76	17	2020-06-25-07-51-45	133	159	Template reloc
2020	6	25	12	10	4.443	38.0696	22.9391	7.83	2	2	5	0.32	46	53	30	2020-06-25-12-10-04	34	115	Template reloc
2020	6	26	6	45	3.817	38.0702	22.8667	12.39	1.7	3	11	0.71	40	64	30	2020-06-26-06-45-04	100	160	Template reloc
2020	6	26	8	55	31.822	38.1731	22.4895	5.28	1.6	10	17	0.47	58	40	44	2020-06-26-08-55-31	134	161	Template reloc
2020	6	27	15	22	20.109	38.0551	22.93	7.34	1.9	2	2	0.81	38	60	24	2020-06-27-15-22-21	34	110	Template reloc
2020	6	27	18	31	4.739	38.1388	22.7192	12.41	2.1	8	10	0.21	72	38	41	2020-06-27-18-31-04	135	126	Template reloc
2020	6	27	19	27	38.609	38.0594	22.9085	5.93	1.4	2	7	0.25	29	63	21	2020-06-27-19-27-39	136	162	Template reloc
2020	6	28	7	19	33.827	38.0538	22.885	9.16	2.8	3	8	0.24	74	50	52	2020-06-28-07-19-34	137	163	Template reloc
2020	6	28	13	11	10.727	38.0568	22.8786	7.49	1.9	2	8	0.21	34	63	22	2020-06-28-13-11-11	137	163	Template reloc
2020	6	28	17	1	34.992	38.0823	22.9207	7.81	1.6	2	7	0.3	30	67	22	2020-06-28-17-01-35	34	115	Template reloc
2020	6	28	22	54	47.337	38.0389	22.921	11.43	1.3	3	3	0.56	33	64	23	2020-06-28-22-54-47	34	135	Template reloc
2020	6	29	1	35	57.719	38.0513	22.9027	3.95	1.8	2	7	0.37	22	62	17	2020-06-29-01-35-58	138	164	Template reloc
2020	6	29	18	8	54.069	38.0326	22.9447	8.02	1.7	1	1	0.86	44	55	31	2020-06-29-18-08-52	34	110	Template reloc
2020	6	29	19	10	28.293	38.0351	22.9524	5.9	1.9	1	3	0.31	73	36	47	2020-06-29-19-10-29	34	79	Template reloc
2020	6	29	19	42	38.659	38.0138	22.9367	8.67	1.2	1	2	0.19	22	53	17	2020-06-29-19-42-38	34	119	Template reloc
2020	7	1	3	41	18.771	38.2143	22.589	12.73	1.4	10	16	0.26	34	51	23	2020-07-01-03-41-18	139	165	Template reloc
2020	7	1	10	27	56.831	38.0303	22.9496	8.75	1.9	1	1	0.59	32	58	21	2020-07-01-10-27-57	34	112	Template reloc
2020	7	1	10	38	59.8	38.025	22.9509	8.53	1.9	1	2	0.31	27	76	19	2020-07-01-10-38-56	34	112	Template reloc
2020	7	1	10	56	34.077	38.036	22.9508	7.32	1.9	1	1	0.38	25	60	17	2020-07-01-10-56-34	34	103	Template reloc
2020	7	2	0	32	48.953	38.0685	22.9234	8.13	1	2	7	0.16	25	64	18	2020-07-02-00-32-34	34	119	Template reloc
2020	7	2	1	28	25.678	38.0551	22.8874	5.13	1.3	2	7	0.35	31	63	23	2020-07-02-01-28-25	140	166	Template reloc
2020	7	2	19	17	22.512	38.0633	22.8729	9.08	1.7	3	10	0.26	43	52	27	2020-07-02-19-17-20	34	167	Template reloc
2020	7	3	9	47	55.103	38.103	22.8666	1.13	1.9	2	10	0.74	46	52	31	2020-07-03-09-47-55	108	131	Template reloc
2020	7	3	16	11	21.855	37.9992	22.9914	5.82	1.8	1	3	0.39	48	37	48	2020-07-03-16-11-22	34	95	Template reloc
2020	7	3	21	19	53.53	38.0543	22.9052	8.65	2.2	2	6	0.3	81	51	46	2020-07-03-21-19-54	141	168	Template reloc
2020	7	4	0	30	54.436	38.0586	22.9394	8.68	1.9	2	6	0.22	51	67	31	2020-07-04-00-30-55	34	115	Template reloc
2020	7	4	2	2	36.031	38.0281	22.9375	7.38	1.6	1	4	0.37	70	46	42	2020-07-04-02-02-37	34	110	Template reloc
2020	7	4	12	18	7.851	38.0401	22.9364	5.71	1.4	1	3	0.28	50	52	34	2020-07-04-12-18-07	34	123	Template reloc
2020	7	4	12	55	17.341	38.0198	22.9484	5.88	1.7	1	1	0.42	48	51	34	2020-07-04-12-55-18	34	123	Template reloc
2020	7	5	1	42	55.924	38.0278	22.9601	5.09	1.7	1	1	0.43	34	62	24	2020-07-05-01-42-53	34	92	Template reloc
2020	7	5	20	27	16.003	38.0653	22.8991	7.34	1.4	2	8	0.15	28	55	21	2020-07-05-20-27-15	34	153	Template reloc
2020	7	5	23	33	33.074	38.0533	22.9165	5.8	2	2	5	0.51	57	42	38	2020-07-05-23-33-34	142	93	Template reloc
2020	7	6	15	46	46.945	38.0794	22.9268	6.39	1.6	2	7	0.81	24	68	18	2020-07-06-15-46-49	34	103	Template reloc
2020	7	6	18	0	25.075	38.084	22.8976	8.68	1.5	2	7	0.28	31	63	23	2020-07-06-18-00-26	108	131	Template reloc
2020	7	6	19	54	2.634	38.0336	22.9426	7.79	3.3	1	3	0.96	113	27	69	2020-07-06-19-54-03	34	110	Template reloc
2020	7	6	20	38	17.815	38.0591	22.9326	6.56	1.7	2	5	0.63	59	43	42	2020-07-06-20-38-19	34	135	Template reloc
2020	7	6	21	15	21.566	38.0411	22.941	8.05	2.4	1	5	1.13	91	23	59	2020-07-06-21-15-22	34	110	Template reloc
2020	7	7	7	37	28.626	38.1491	22.8616	35.55	1.6	4	13	0.79	27	74	20	2020-07-07-07-37-34	143	169	Template loc
2020	7	7	7	42	8.981	38.1832	22.5863	11.77	1.8	10	12	0.25	32	58	23	2020-07-07-07-42-08	143	169	Template reloc
2020	7	7	7	50	36.111	38.124	22.6573	20.42	2.2	8	6	2.83	51	42	31	2020-07-07-07-50-37	143	169	Template reloc
2020	7	7	8	3	36.149	38.1594	22.8597	18.97	1.4	0	12	0.85	29	74	21	2020-07-07-08-03-39	144	169	Template loc
2020	7	7	13	0	1.779	38.0323	22.9533	5.81	2	1	3	0.49	72	37	49	2020-07-07-13-00-03	34	87	Template reloc
2020	7	7	13	29	46.873	37.9961	22.9695	8.83	1.7	1	0	0.2	21	67	17	2020-07-07-13-29-46	34	103	Template reloc
2020	7	7	19	23	19.798	38.0536	22.9344	7.23	1.9	2	5	1.55	68	43	49	2020-07-07-19-23-21	34	76	Template reloc
2020	7	8	0	35	29.721	38.1039	22.6734	18.11	1.7	8	4	2.73	67	33	43	2020-07-08-00-35-32	145	170	Template reloc
2020	7	8	9	7	13.28	38.0618	22.9293	8.63	1.8	2	7	0.27	37	45	25	2020-07-08-09-07-13	34	119	Template reloc
2020	7	8	12	31	34.189	38.0595	22.9346	7.16	2.2	2	5	0.32	67	43	39	2020-07-08-12-31-35	34	107	Template reloc
2020	7	8	15	10	15.121	38.0303	22.8737	3.01	1.6	3	8	0.37	27	65	27	2020-07-08-15-10-15	140	166	Template loc
2020	7	8	16	38	57.784	38.0139	22.9308	1.5	1.4	1	4	0.3	25	60	25	2020-07-08-16-38-58	34	123	Template reloc
2020	7	8	20	48	54.05	38.0245	22.8873	9.12	1.5	3	8	0.39	60	67	37	2020-07-08-20-48-55	138	164	Template reloc
2020	7	9	0	40	40.4	38.0442	22.955	8.72	1.8	1	2	0.77	84	34	62	2020-07-09-00-40-41	34	87	Template reloc
2020	7	9	6	59	41.241	38.0664	22.9013	7.32	2	2	7	0.31	74	33	55	2020-07-09-06-59-41	126	152	Template reloc
2020	7	9	8	28	32.327	38.0483	22.8761	6.95	1.9	3	6	0.63	57	52	46	2020-07-09-08-28-33	137	171	Template reloc
2020	7	9	15	44	46.456	38.0316	22.9499	9.29	1.7	1	1	0.45	38	55	27	2020-07-09-15-44-47	34	96	Template reloc
2020	7	9	16	2	49.742	38.0515	22.9437	4.93	2.1	1	3	0.54	67	40	53	2020-07-09-16-02-50	83	93	Template reloc
2020	7	9	23	21	21.236	38.0562	22.885	8.7	2.1	3	9	0.42	70	29	44	2020-07-09-23-21-22	137	171	Template reloc
2020	7	10	0	29	18.997	38.0628	22.8823	7.24	1.9	2	8	0.46	48	46	31	2020-07-10-00-29-20	137	171	Template reloc
2020	7	10	2	9	30.504	38.0655	22.8997	9.14	1.7	2	7	0.42	28	65	21	2020-07-10-02-09-31	146	168	Template reloc
2020	7	10	19	56	40.449	38.0393	22.9482	3.82	2.3	1	1	0.19	62	48	38	2020-07-10-19-56-41	34	79	Template reloc
2020	7	11	13	2	20.007	38.0607	22.9028	8.29	1.5	2	6	0.35	50	57	36	2020-07-11-13-02-20	34	153	Template reloc
2020	7	11	13	3	30.769	37.9936	22.9078	10.45	1.4	1	8	0.42	29	78	23	2020-07-11-13-03-31	137	163	Template reloc
2020	7	11	17	15	17.559	38.073	22.856	7.12	1.7	2	11	0.48	32	64	28	2020-07-11-17-15-17	4	4	Template reloc
2020	7	12	6	57	25.919	38.0498	22.9395	9.81	1.5	2	4	0.47	57	39	47	2020-07-12-06-57-27	34	103	Template reloc
2020	7	12	22	51	9.176	38.0532	22.8808	1.63	1.5	2	9	0.51	27	61	27	2020-07-12-22-51-09	147	172	Template reloc
2020	7	14	2	22	24.397	38.0229	22.8621	7.83	1.7	3	10	0.27	53	41	40	2020-07-14-02-22-24	148	173	Template reloc
2020	7	14	21	1	9.345	38.0743	22.952	4.92	1.5	1	7	0.36	42	45	32	2020-07-14-21-01-09	34	147	Template reloc
2020	7	14	22	12	54.824	38.0413	22.9262	2.52	1.5	1	5	0.58	57	40	45	2020-07-14-22-12-55	149	174	Template reloc
2020	7	15	9	11	53.17	38.0721	22.8541	6.31	1.8	2	10	0.45	85	43	52	2020-07-15-09-11-53	150	175	Template reloc
2020	7	15	22	40	44.903	38.0009	22.7423	20.65	1.5	0	1	0.29	25	103	22	2020-07-15-22-40-44	151	176	Template loc
2020	7	16	1	57	48.128	38.0577	22.9008	9.77	1.2	2	7	0.16	25	66	19	2020-07-16-01-57-48	108	131	Template reloc
2020	7	16	2	42	3.07	38.0459	22.9076	11.22	1.2	2	7	0.27	25	64	20	2020-07-16-02-42-03	152	177	Template reloc
2020	7	16	5	53	53.037	38.1547	22.6942	10.26	1.8	8	12	1.46	50	34	30	2020-07-16-05-53-53	153	178	Template reloc
2020	7	16	8	10	4.185	38.1838	22.6303	11.37	1.5	9	13	0.22	31	50	22	2020-07-16-08-10-03	154	179	Template reloc
2020	7	16	19	20	15.36	38.101	22.8682	10.58	1.5	2	12	0.66	69	51	39	2020-07-16-19-20-16	155	180	Template reloc
2020	7	16	19	31	52.376	38.0906	22.8665	10.64	2.2	2	12	0.62	105	46	63	2020-07-16-19-31-53	155	180	Template reloc
2020	7	17	3	15	44.661	38.0565	22.8699	1.97	1.2	2	7	0.39	21	65	15	2020-07-17-03-15-45	156	75	Template reloc
2020	7	17	3	24	54.662	38.0364	22.9143	7.44	1.5	1	5	0.19	33	61	21	2020-07-17-03-24-55	157	181	Template reloc
2020	7	17	7	51	27.148	38.0398	22.9165	7.9	2.1	1	5	0.9	49	59	29	2020-07-17-07-51-26	158	181	Template reloc
2020	7	17	17	40	3.6	38.0239	22.9384	10.36	0.6	1	4	0.48	19	69	14	2020-07-17-17-39-51	159	182	Template reloc
2020	7	18	3	21	56.814	38.0476	22.8866	9.1	1.1	3	7	0.2	34	61	21	2020-07-18-03-21-57	160	183	Template reloc
2020	7	18	5	53	4.14	38.0084	22.8538	4.42	1.2	3	9	0.57	27	83	18	2020-07-18-05-53-03	161	184	Template reloc
2020	7	18	8	2	17.422	38.0112	22.9386	9.36	1.2	1	4	0.56	25	60	19	2020-07-18-08-02-17	149	174	Template reloc
2020	7	18	11	28	31.97	38.0511	22.8596	8.05	2.2	3	10	0.61	102	34	63	2020-07-18-11-28-32	162	173	Template reloc
2020	7	18	22	15	19.766	38.0646	22.8714	10.19	2.4	3	10	0.33	78	43	51	2020-07-18-22-15-20	163	185	Template reloc
2020	7	19	6	49	9.971	38.0511	22.9042	14.8	1.1	3	8	0.29	22	64	16	2020-07-19-06-49-11	34	167	Template reloc
2020	7	19	15	43	1.085	38.0736	22.8702	9.49	2.5	3	10	0.35	105	28	69	2020-07-19-15-43-01	163	185	Template reloc
2020	7	19	23	3	11.754	38.0533	22.8752	13.32	1.6	3	9	0.76	21	65	16	2020-07-19-23-03-11	164	186	Template reloc
2020	7	20	0	1	59.617	38.0299	22.888	10.13	1.1	3	7	0.31	25	65	17	2020-07-20-00-02-00	165	187	Template reloc
2020	7	20	0	21	7.273	38.0496	22.8913	12.41	1	3	7	0.12	23	61	16	2020-07-20-00-21-07	34	188	Template reloc
2020	7	20	10	38	53.216	38.0544	22.9058	9.58	1.7	2	6	0.42	64	44	43	2020-07-20-10-38-53	34	153	Template reloc
2020	7	20	13	23	0.718002	38.0513	22.88	9.67	2.7	3	10	0.55	108	24	69	2020-07-20-13-23-01	34	41	Template reloc
2020	7	20	15	3	25.906	38.0532	22.8755	9.14	1.7	3	10	0.4	35	54	24	2020-07-20-15-03-27	34	188	Template reloc
2020	7	20	16	55	24.344	38.0486	22.8798	9.79	1.3	3	8	0.27	27	61	18	2020-07-20-16-55-25	34	167	Template reloc
2020	7	20	21	33	22.67	38.05	22.8789	9.35	1.7	3	9	0.33	61	42	37	2020-07-20-21-33-23	34	167	Template reloc
2020	7	20	21	54	40.188	38.02	22.8792	13.53	1.7	3	8	0.4	26	77	17	2020-07-20-21-54-40	166	189	Template reloc
2020	7	21	2	59	28.602	38.0444	22.9008	12.66	0.8	3	4	0.24	21	60	20	2020-07-21-02-59-28	34	188	Template reloc
2020	7	21	3	6	59.651	38.0474	22.8921	8.92	1.7	3	7	0.38	66	32	50	2020-07-21-03-07-00	167	190	Template reloc
2020	7	21	9	52	48.862	38.0392	22.8938	9.22	1.5	3	7	0.33	44	64	29	2020-07-21-09-52-48	167	190	Template reloc
2020	7	21	10	25	20.079	37.9965	22.776	10.95	2.4	5	3	0.5	105	43	61	2020-07-21-10-25-20	168	191	Template reloc
2020	7	21	10	29	9.672	37.995	22.7779	12.09	1.2	5	2	0.27	27	114	17	2020-07-21-10-28-43	168	191	Template reloc
2020	7	21	11	20	31.521	38.0543	22.8639	10.08	1.2	3	8	0.6	35	65	21	2020-07-21-11-20-31	169	192	Template reloc
2020	7	21	15	39	18.088	38.0428	22.8911	9.06	1.3	3	6	0.38	26	65	18	2020-07-21-15-39-19	167	190	Template reloc
2020	7	21	15	45	3.745	38.0283	22.8916	11.06	1.3	3	6	0.25	28	68	20	2020-07-21-15-45-04	164	186	Template reloc
2020	7	21	16	33	16.837	38.0008	22.7807	11.93	2.1	5	3	0.29	81	44	58	2020-07-21-16-33-17	168	191	Template reloc
2020	7	21	17	31	21.267	37.9999	22.7786	10.93	1.3	5	3	0.33	24	123	16	2020-07-21-17-31-20	168	191	Template reloc
2020	7	21	19	7	55.56	38.0354	22.9331	6.32	1.5	1	2	0.38	32	54	22	2020-07-21-19-07-56	83	193	Template reloc
2020	7	21	20	21	48.223	38.0293	22.9281	6.64	1.1	1	4	0.11	19	68	15	2020-07-21-20-21-47	83	193	Template reloc
2020	7	21	20	24	52.874	37.9939	22.7778	11.16	1.8	5	3	0.35	53	56	32	2020-07-21-20-24-53	168	191	Template reloc
2020	7	21	20	49	43.073	37.9263	22.9623	8.38	1.5	0	6	0.81	32	90	22	2020-07-21-20-49-42	167	190	Template loc
2020	7	22	11	16	39.685	37.9978	22.776	11.43	2.4	5	3	0.41	115	33	64	2020-07-22-11-16-40	168	191	Template reloc
2020	7	22	12	44	52.835	38.1888	22.7536	18.5	1.7	6	15	0.32	42	57	25	2020-07-22-12-44-53	170	194	Template reloc
2020	7	22	18	54	9.091	38.0421	22.8927	14.64	1.2	3	11	0.09	20	69	16	2020-07-22-18-54-09	171	195	Template reloc
2020	7	22	19	28	57.681	38.0567	22.8827	13.13	1.6	3	7	0.23	40	68	24	2020-07-22-19-28-57	171	195	Template reloc
2020	7	23	17	43	36.365	38.0614	22.8774	9.01	1.5	3	9	0.33	51	41	32	2020-07-23-17-43-36	34	167	Template reloc
2020	7	23	18	42	8.023	38.0328	22.8726	9.69	1.3	3	8	0.36	30	70	20	2020-07-23-18-42-09	172	196	Template reloc
2020	7	24	11	1	34.849	38.0492	22.9067	9.89	1.7	2	6	0.33	26	65	17	2020-07-24-11-01-34	173	127	Template reloc
2020	7	25	8	50	1.272	38.0654	22.8762	10.62	1.9	3	10	0.6	55	52	39	2020-07-25-08-50-01	169	192	Template reloc
2020	7	25	13	21	53.876	38.0597	22.8707	10.97	1.7	3	9	0.33	58	57	36	2020-07-25-13-21-54	169	192	Template reloc
2020	7	25	19	43	38.059	38.0348	22.863	4.69	0.6	3	8	0.11	20	73	15	2020-07-25-19-43-23	150	148	Template reloc
2020	7	25	20	59	27.972	38.043	22.8748	9.96	1.2	3	8	0.38	21	61	16	2020-07-25-20-59-28	150	197	Template reloc
2020	7	25	21	21	8.051	38.2663	22.7154	7.89	1.3	7	16	0.43	26	61	21	2020-07-25-21-21-07	174	198	Template reloc
2020	7	25	21	46	17.348	38.272	22.693	18.17	1.1	7	19	0.45	36	60	22	2020-07-25-21-46-12	174	198	Template reloc
2020	7	26	0	23	20.327	38.0534	22.9085	9.54	0.9	2	6	0.16	32	59	22	2020-07-26-00-22-59	173	127	Template reloc
2020	7	26	9	5	24.348	38.0512	22.8684	10.92	2	3	9	0.29	56	31	36	2020-07-26-09-05-25	169	192	Template reloc
2020	7	26	11	15	5.328	38.0608	22.8658	9.73	1.5	3	9	0.55	32	61	22	2020-07-26-11-15-06	164	186	Template reloc
2020	7	26	15	9	26.037	38.0243	22.8767	9.69	1.9	3	8	0.51	44	67	31	2020-07-26-15-09-27	175	199	Template reloc
2020	7	26	16	4	34.55	38.026	22.8675	14.29	1.4	3	9	0.26	27	84	19	2020-07-26-16-04-34	169	200	Template reloc
2020	7	26	18	37	25.33	38.0483	22.8611	9.7	2	3	10	0.31	56	60	35	2020-07-26-18-37-26	176	201	Template reloc
2020	7	26	23	15	53.667	38.0454	22.8619	9.75	1.1	3	11	0.31	37	64	24	2020-07-26-23-15-53	169	192	Template reloc
2020	7	26	23	18	10.111	38.0512	22.8715	11.44	1.2	3	10	0.4	65	56	40	2020-07-26-23-18-10	169	192	Template reloc
2020	7	26	23	46	36.443	38.0325	22.8693	10.35	1.2	3	9	0.25	60	72	37	2020-07-26-23-46-36	177	202	Template reloc
2020	7	27	1	58	18.827	38.0555	22.8673	11.73	1.1	3	8	0.26	27	65	27	2020-07-27-01-58-18	178	203	Template reloc
2020	7	27	3	55	46.991	38.0586	22.8672	10.83	1.9	3	10	0.37	68	43	48	2020-07-27-03-55-48	169	200	Template reloc
2020	7	27	5	22	36.363	38.056	22.8724	11.84	2.2	3	8	0.27	25	62	18	2020-07-27-05-22-37	169	200	Template reloc
2020	7	27	12	39	50.591	38.0524	22.8669	11.63	1.7	3	10	0.26	25	62	16	2020-07-27-12-39-50	179	204	Template reloc
2020	7	27	13	28	26.573	38.2747	22.6817	13.21	1.4	7	20	0.28	34	61	22	2020-07-27-13-28-27	180	205	Template reloc
2020	7	27	21	47	29.683	38.0392	22.8787	9.23	0.6	3	7	0.08	19	65	14	2020-07-27-21-47-17	34	188	Template reloc
2020	7	27	22	48	9.191	38.0536	22.8773	9.53	1.6	3	10	0.51	55	44	32	2020-07-27-22-48-10	34	188	Template reloc
2020	7	28	9	26	52.351	38.1417	22.6686	12.79	1.7	8	12	0.7	24	92	18	2020-07-28-09-26-48	181	206	Template reloc
2020	7	28	23	16	0.641998	38.0459	22.8441	9.09	1.4	3	9	0.44	30	75	25	2020-07-28-23-16-00	182	207	Template reloc
2020	7	29	11	45	6.053	38.0418	22.8828	12.6	0.8	3	5	0.2	20	68	14	2020-07-29-11-44-45	150	175	Template reloc
2020	7	29	17	7	43.761	38.0556	22.8892	9.03	1.7	3	9	0.22	18	66	14	2020-07-29-17-07-44	137	171	Template reloc
2020	7	29	19	50	22.461	38.0212	22.881	14.17	1.4	3	8	0.54	26	77	26	2020-07-29-19-50-22	166	189	Template reloc
2020	7	29	22	56	24.848	38.04	22.8743	8.41	1.2	3	8	0.19	21	78	20	2020-07-29-22-56-25	150	148	Template reloc
2020	7	30	13	10	17.915	38.0439	22.8712	7.7	1.2	3	9	0.35	28	62	23	2020-07-30-13-10-18	172	196	Template reloc
2020	7	30	16	58	27.384	38.0325	22.8681	8.34	1.4	3	8	0.43	30	72	20	2020-07-30-16-58-29	172	196	Template reloc
2020	7	31	2	39	40.845	38.0542	22.8941	10.81	1.4	2	9	0.62	39	50	24	2020-07-31-02-39-41	137	163	Template reloc
2020	7	31	6	15	28.093	38.0547	22.8768	14.59	1	3	7	0.22	21	68	15	2020-07-31-06-15-29	178	203	Template reloc
2020	7	31	23	4	45.335	38.0493	22.8866	7.1	1.4	3	9	0.29	30	55	26	2020-07-31-23-04-45	159	182	Template reloc
2020	8	1	11	13	34.216	38.0302	22.8689	14.88	0.6	0	8	0.19	18	66	14	2020-08-01-11-13-23	183	204	Template loc
2020	8	2	1	54	18.294	38.1432	22.6941	13.94	1.3	8	11	0.47	29	52	19	2020-08-02-01-54-18	107	130	Template reloc
2020	8	2	4	49	50.056	38.054	22.8702	12.21	1.8	3	10	0.35	54	55	33	2020-08-02-04-49-50	178	208	Template reloc
2020	8	2	6	33	27.993	38.0442	22.8726	13.53	1.8	3	8	0.4	64	58	40	2020-08-02-06-33-28	184	209	Template reloc
2020	8	2	7	13	28.798	38.0284	22.8385	9.96	1.3	3	9	0.12	15	71	14	2020-08-02-07-13-28	179	204	Template loc
2020	8	2	9	53	51.361	38.1816	22.5771	11.6	1.5	10	11	0.09	38	58	24	2020-08-02-09-53-52	185	210	Template reloc
2020	8	2	14	35	4.92	38.0741	22.8614	10.44	2.4	3	11	0.32	97	30	64	2020-08-02-14-35-05	186	211	Template reloc
2020	8	2	19	14	8.281	38.0374	22.9636	7.46	1.4	1	2	0.47	30	61	25	2020-08-02-19-14-09	187	212	Template reloc
2020	8	2	22	11	28.545	38.0355	22.8748	11.87	1	3	9	0.25	20	75	15	2020-08-02-22-11-28	171	195	Template reloc
2020	8	3	9	7	12.87	38.0613	22.8812	14.08	1.7	3	7	0.29	37	61	25	2020-08-03-09-07-12	178	203	Template reloc
2020	8	3	10	55	35.41	38.0919	22.7979	13.08	1.6	4	11	0.39	44	52	27	2020-08-03-10-55-35	100	120	Template reloc
2020	8	3	14	1	15.793	38.0325	22.8845	10.04	2.2	3	7	0.45	65	25	53	2020-08-03-14-01-16	188	213	Template reloc
2020	8	3	18	22	23.241	38.0471	22.8738	10.14	1.8	3	9	0.37	53	58	41	2020-08-03-18-22-23	4	4	Template reloc
2020	8	3	23	42	20.471	38.094	22.824	4.07	0.6	4	13	0.11	18	61	14	2020-08-03-23-42-10	189	214	Template reloc
2020	8	4	4	8	32.043	38.0395	22.8501	9.68	1	3	8	0.31	19	78	15	2020-08-04-04-08-31	190	215	Template reloc
2020	8	4	8	14	24.593	38.0536	22.8665	10.24	0.9	3	9	0.59	21	64	15	2020-08-04-08-14-25	169	192	Template reloc
2020	8	4	22	32	31.663	38.0586	22.8399	10.31	1.5	3	10	0.42	48	47	33	2020-08-04-22-32-30	191	216	Template reloc
2020	8	4	23	49	8.15	38.0364	22.862	9.27	1.2	3	10	0.5	37	62	26	2020-08-04-23-49-08	150	217	Template reloc
2020	8	5	2	5	36.886	38.058	22.8711	12.64	1.2	3	10	0.32	31	64	20	2020-08-05-02-05-29	178	203	Template reloc
2020	8	5	5	35	14.902	38.0527	22.9332	7.94	2.7	2	3	0.39	94	37	59	2020-08-05-05-35-16	34	147	Template reloc
2020	8	5	8	44	9.257	38.0348	22.8764	11.29	1.6	3	8	0.56	39	62	24	2020-08-05-08-44-08	150	189	Template reloc
2020	8	6	2	8	43.015	38.041	22.8724	10.91	1.8	3	8	0.34	39	42	24	2020-08-06-02-08-44	150	189	Template reloc
2020	8	6	4	10	14.777	38.0451	22.8743	10.53	2.1	3	9	0.3	81	29	52	2020-08-06-04-10-15	150	197	Template reloc
2020	8	6	17	48	32.285	38.0561	22.8705	9.86	2.9	3	10	0.32	113	43	65	2020-08-06-17-48-33	192	218	Template reloc
2020	8	6	17	57	26.553	38.0341	22.886	13.13	1.8	3	8	0.28	37	69	25	2020-08-06-17-57-26	150	197	Template reloc
2020	8	6	18	56	29.505	37.9969	22.7836	11.87	1.1	5	2	0.55	25	120	17	2020-08-06-18-56-29	193	219	Template reloc
2020	8	6	20	9	3.501	38.0368	22.8706	9.59	1.8	3	9	0.43	78	42	46	2020-08-06-20-09-04	150	148	Template reloc
2020	8	6	21	33	0.660004	38.042	22.8713	8.47	1.6	3	10	0.57	60	62	36	2020-08-06-21-33-02	34	167	Template reloc
2020	8	6	22	49	56.366	38.0027	22.7775	10.86	1.6	5	4	0.31	55	33	32	2020-08-06-22-49-57	194	220	Template reloc
2020	8	7	3	57	20.16	38.046	22.873	10.25	1.8	3	1	0.35	18	84	15	2020-08-07-03-57-17	150	175	Template reloc
2020	8	8	1	50	16.131	38.0365	22.8933	15.94	1.1	3	6	0.08	19	67	15	2020-08-08-01-49-32	150	197	Template loc
2020	8	8	15	32	54.37	38.0354	22.8638	9.14	1.6	3	9	0.5	41	69	25	2020-08-08-15-32-55	195	217	Template reloc
2020	8	9	5	43	43.235	38.0405	22.8866	17.08	1.3	3	8	0.4	21	75	16	2020-08-09-05-43-43	196	221	Template reloc
2020	8	9	13	2	48.856	38.0484	22.8754	12.82	1.9	3	9	0.55	40	51	25	2020-08-09-13-02-50	178	208	Template reloc
2020	8	9	17	23	14.322	38.16	22.749	16.67	1.8	6	14	0.29	35	42	22	2020-08-09-17-23-14	197	222	Template reloc
2020	8	10	19	16	5.02	38.1619	22.6475	10.55	1.3	9	8	0.66	53	47	32	2020-08-10-19-16-05	198	223	Template reloc
2020	8	12	18	29	43.706	37.9718	22.7755	8.91	1.2	5	2	0.49	38	120	24	2020-08-12-18-29-43	199	224	Template reloc
2020	8	13	2	47	23.112	38.025	22.9481	9.5	1.4	1	2	0.55	43	53	27	2020-08-13-02-47-23	200	225	Template reloc
2020	8	13	13	41	34.879	38.0402	22.8764	10.72	2.5	3	9	0.24	103	30	68	2020-08-13-13-41-35	150	148	Template reloc
2020	8	13	21	53	26.228	37.9967	22.7769	11.07	1.5	5	2	0.8	54	121	33	2020-08-13-21-53-27	201	226	Template reloc
2020	8	15	0	8	49.7	38.0143	22.9547	12.6	1	1	2	0.19	52	48	35	2020-08-15-00-08-50	202	227	Template reloc
2020	8	15	1	51	14.187	38.0175	22.9372	11.51	1.1	1	2	1.01	58	47	37	2020-08-15-01-51-15	202	227	Template reloc
2020	8	15	9	58	30.509	38.0957	22.774	15	1.6	4	7	0.09	20	61	16	2020-08-15-09-58-30	12	228	Template reloc
2020	8	15	23	28	7.889	38.2258	22.5939	12.1	1.3	10	16	0.26	46	43	33	2020-08-15-23-28-04	203	229	Template reloc
2020	8	16	11	58	45.029	38.1056	22.7759	12.84	1.7	4	10	0.68	79	30	54	2020-08-16-11-58-46	12	228	Template reloc
2020	8	17	0	20	31.219	38.037	22.9216	12.58	1.6	3	5	0.54	37	52	33	2020-08-17-00-20-31	204	230	Template reloc
2020	8	17	6	38	16.124	38.0214	22.8877	9.89	1.7	3	8	0.59	37	69	28	2020-08-17-06-38-17	204	230	Template reloc
2020	8	19	23	11	5.881	37.991	22.7805	10.21	0.9	5	3	0.33	53	121	32	2020-08-19-23-11-05	193	231	Template reloc
2020	8	21	7	25	26.118	38.2213	22.5895	14.4	1.6	10	16	0.41	34	50	21	2020-08-21-07-25-26	205	232	Template reloc
2020	8	23	6	1	37.716	38.1533	22.6216	10.82	2	9	6	0.44	45	45	27	2020-08-23-06-01-37	206	233	Template reloc
2020	8	24	12	5	5.024	37.9957	22.7756	12.1	0.9	5	3	0.48	23	123	16	2020-08-24-12-04-32	207	234	Template reloc
2020	8	26	19	16	8.788	38.0662	22.8453	10.71	1.7	3	10	0.37	57	46	38	2020-08-26-19-16-08	208	235	Template reloc
2020	8	27	12	54	49.074	38.0241	22.8767	14.19	1.3	3	8	0.37	36	73	23	2020-08-27-12-54-49	14	236	Template reloc
2020	8	29	0	56	55.638	38.1048	22.7783	13.33	1.4	4	10	0.6	88	32	52	2020-08-29-00-56-56	12	228	Template reloc
2020	8	29	0	59	48.091	38.1	22.7769	12.55	1.3	4	12	0.28	52	47	30	2020-08-29-00-59-47	12	228	Template reloc
2020	8	29	1	59	22.726	38.1027	22.7772	12.17	0.6	4	11	0.32	21	66	15	2020-08-29-01-59-20	12	228	Template reloc
2020	8	29	6	50	37.833	38.0947	22.8551	18.34	0.8	0	12	0.08	19	68	14	2020-08-29-06-50-23	209	237	Template loc
2020	9	2	19	14	32.646	38.1829	22.6442	11.21	1.5	9	12	0.38	47	39	32	2020-09-02-19-14-33	210	238	Template reloc
2020	9	3	1	58	47.388	38.1887	22.5741	11.12	1.5	10	11	0.33	61	38	40	2020-09-03-01-57-28	145	170	Template reloc
2020	9	3	4	56	48.213	38.1059	22.7764	12.14	2.2	4	12	0.28	48	45	31	2020-09-03-04-56-48	12	239	Template reloc
2020	9	3	6	23	36.056	38.1187	22.6113	12.77	1.8	9	3	0.38	42	93	28	2020-09-03-06-23-36	211	240	Template reloc
2020	9	3	9	28	19.043	38.0885	22.7803	14.5	1.8	4	7	0.29	39	46	25	2020-09-03-09-28-18	12	239	Template reloc
2020	9	3	9	30	45.875	38.1092	22.7775	13.22	1.8	4	9	0.24	45	41	30	2020-09-03-09-30-46	12	239	Template reloc
2020	9	3	11	6	48.696	38.1042	22.7739	12.27	1	4	13	0.04	20	69	15	2020-09-03-11-06-48	12	239	Template reloc
2020	9	3	14	15	49.179	38.0877	22.9504	5.93	1.2	1	9	0.29	35	60	24	2020-09-03-14-15-49	212	241	Template reloc
2020	9	4	14	3	16.1	38.0888	22.7788	14.6	1.2	4	10	0.2	25	59	17	2020-09-04-14-03-15	12	242	Template reloc
2020	9	5	5	39	20.908	38.0986	22.7766	13.43	1.8	4	12	0.35	40	51	25	2020-09-05-05-39-18	12	228	Template reloc
2020	9	5	5	42	10.862	38.1078	22.7784	13.08	2.5	4	11	0.26	60	29	38	2020-09-05-05-42-10	12	228	Template reloc
2020	9	5	6	4	19.987	38.1071	22.7761	12.94	2.2	4	13	0.21	49	29	32	2020-09-05-06-04-20	12	228	Template reloc
2020	9	5	11	43	10.69	38.1053	22.777	12.75	2.2	4	10	0.48	89	29	55	2020-09-05-11-43-10	12	239	Template reloc
2020	9	5	14	33	31.492	38.0865	22.781	15.28	1.6	4	6	0.22	24	61	16	2020-09-05-14-33-31	12	239	Template reloc
2020	9	5	16	49	20.388	38.1036	22.7759	13.34	1.9	4	7	0.67	74	35	47	2020-09-05-16-49-20	12	239	Template reloc
2020	9	5	19	47	33.432	38.1556	22.7813	7.35	1.3	4	14	0.22	26	70	18	2020-09-05-19-47-25	12	243	Template reloc
2020	9	6	10	13	8.997	37.9753	22.7717	7.98	1.1	5	5	0.26	25	127	18	2020-09-06-10-13-09	199	224	Template reloc
2020	9	6	15	10	3.039	38.0643	22.7763	10.68	1.2	4	7	0.4	22	57	17	2020-09-06-15-10-02	213	244	Template reloc
2020	9	6	16	26	24.48	38.1158	22.7754	13	2.5	4	13	0.31	64	29	46	2020-09-06-16-26-25	12	239	Template reloc
2020	9	7	0	54	20.636	38.0759	22.8414	12.59	1.3	3	10	0.39	53	47	33	2020-09-07-00-54-21	214	245	Template reloc
2020	9	7	2	50	30.985	38.1762	22.7051	6.16	1.4	6	13	0.23	28	55	19	2020-09-07-02-50-31	215	246	Template reloc
2020	9	7	5	46	26.002	38.1156	22.7783	11.43	2.2	4	12	0.3	63	35	37	2020-09-07-05-46-26	12	242	Template reloc
2020	9	7	5	53	46.88	38.0964	22.7771	13.78	1.3	4	11	0.19	29	62	19	2020-09-07-05-53-46	12	242	Template reloc
2020	9	7	5	54	13.07	38.0993	22.7745	14.79	2	4	10	0.45	38	45	27	2020-09-07-05-54-13	12	242	Template reloc
2020	9	7	6	26	49.427	38.09	22.7769	13.98	1.8	4	6	0.46	48	51	29	2020-09-07-06-26-49	12	18	Template reloc
2020	9	7	11	23	8.61	37.9922	22.7754	12.05	0.9	5	3	0.44	24	122	16	2020-09-07-11-22-37	216	247	Template reloc
2020	9	8	6	10	29.414	37.8181	22.8291	14.8	1.2	0	9	0.33	24	157	17	2020-09-08-06-10-29	217	248	Template loc
2020	9	9	17	29	49.682	38.0073	22.7764	10.88	2.3	5	2	0.27	97	32	60	2020-09-09-17-29-50	207	249	Template reloc
2020	9	10	7	19	6.173	38.0904	22.7798	14.7	1.9	4	3	0.63	54	42	33	2020-09-10-07-19-04	12	239	Template reloc
2020	9	10	20	39	40.627	37.9811	22.7752	11.34	1.1	5	6	0.15	21	131	15	2020-09-10-20-39-07	207	249	Template reloc
2020	9	10	20	39	46.538	38.0111	22.7739	13.22	1.5	5	2	0.47	63	74	38	2020-09-10-20-39-46	207	249	Template reloc
2020	9	10	21	53	9.814	38.0178	22.7723	9.11	1	5	2	0.48	50	48	30	2020-09-10-21-53-10	218	250	Template reloc
2020	9	12	12	4	37.659	38.2789	22.626	23.93	1.5	0	18	0.33	57	47	34	2020-09-12-12-04-30	219	251	Template loc
2020	9	12	15	27	31.649	37.9899	22.7735	11.83	1.3	5	2	0.19	42	54	27	2020-09-12-15-27-31	216	247	Template reloc
2020	9	12	19	52	34.155	38.1156	22.7779	12.03	1.8	4	11	0.21	51	33	35	2020-09-12-19-52-35	12	18	Template reloc
2020	9	12	20	45	5.186	38.1827	22.7579	11.72	3	6	14	0.41	118	23	71	2020-09-12-20-45-05	220	252	Template reloc
2020	9	12	21	15	34.328	38.1799	22.7542	11.09	1.6	6	15	0.35	52	30	32	2020-09-12-21-15-35	220	252	Template reloc
2020	9	12	23	10	3.779	38.1898	22.748	12.15	2.7	6	15	0.33	102	24	58	2020-09-12-23-10-03	221	253	Template reloc
2020	9	12	23	13	24.136	38.1958	22.7534	8	2.1	6	14	0.36	87	29	49	2020-09-12-23-13-25	221	253	Template reloc
2020	9	13	0	32	53.936	38.183	22.7569	10.99	1.5	6	15	0.26	35	58	23	2020-09-13-00-32-54	220	254	Template reloc
2020	9	13	0	55	47.518	38.1771	22.7667	8.99	1.4	6	13	0.65	27	46	20	2020-09-13-00-55-47	220	254	Template reloc
2020	9	13	5	53	12.068	38.1803	22.7585	13.1	2.9	6	15	0.23	89	32	54	2020-09-13-05-53-12	220	252	Template reloc
2020	9	13	5	54	48.412	38.1796	22.7466	19.67	2.4	6	15	0.84	42	56	29	2020-09-13-05-54-48	221	253	Template reloc
2020	9	13	6	30	9.722	38.1405	22.7902	20.3	1.6	4	15	0.21	26	53	18	2020-09-13-06-30-10	222	255	Template reloc
2020	9	13	6	51	59.929	38.1117	22.7458	23.43	1.7	8	9	0.72	27	70	19	2020-09-13-06-51-59	223	256	Template reloc
2020	9	13	7	4	51.569	38.1726	22.7514	16.74	1.7	6	15	0.16	40	31	26	2020-09-13-07-04-51	222	255	Template reloc
2020	9	13	8	1	20.387	38.1862	22.7568	9.59	1.9	6	15	0.41	52	29	33	2020-09-13-08-01-21	222	255	Template reloc
2020	9	15	17	48	34.463	38.1083	22.7764	12.53	2	4	10	0.4	59	32	47	2020-09-15-17-48-34	12	239	Template reloc
2020	9	16	10	54	26.812	38.172	22.4649	34.91	1.5	0	18	0.52	30	67	21	2020-09-16-10-54-26	224	257	Template loc
2020	9	16	19	24	10.798	37.9896	22.777	9.78	1.2	5	3	0.44	51	56	32	2020-09-16-19-24-11	207	234	Template reloc
2020	9	17	5	52	30.555	38.1671	22.7422	15.32	2	6	15	0.32	56	23	42	2020-09-17-05-52-31	225	151	Template reloc
2020	9	17	15	9	37.301	38.1033	22.9068	12.06	1.1	2	11	0.24	25	75	18	2020-09-17-15-09-36	226	258	Template reloc
2020	9	17	19	12	17.52	38.1797	22.7434	6.99	1.8	6	17	0.28	34	48	21	2020-09-17-19-12-17	227	259	Template reloc
2020	9	18	17	55	10.235	38.1416	22.7564	19.39	1.8	6	9	1.14	40	50	24	2020-09-18-17-54-32	225	260	Template reloc
2020	9	19	1	10	35.95	38.2006	22.7468	5.29	1.5	6	14	0.27	40	43	26	2020-09-19-01-10-36	228	261	Template reloc
2020	9	19	5	19	43.618	38.1859	22.7472	5.33	1.7	6	16	1.06	56	43	32	2020-09-19-05-19-44	228	261	Template reloc
2020	9	19	6	50	3.961	38.1773	22.7454	13.68	1.3	6	14	0.08	21	91	15	2020-09-19-06-50-05	228	261	Template reloc
2020	9	20	4	3	31.974	38.156	22.7513	17.02	1.7	6	12	0.46	34	50	25	2020-09-20-04-03-31	225	260	Template reloc
2020	9	21	8	56	4.74	38.0261	23.0432	9.74	1.5	1	8	1.05	43	58	27	2020-09-21-08-56-04	63	71	Template reloc
2020	9	21	13	59	49.735	38.173	22.7369	14.87	1.6	6	14	0.24	35	37	27	2020-09-21-13-59-50	229	262	Template reloc
2020	9	21	15	55	33.607	38.1707	22.7391	17.62	1.3	6	13	0.29	33	35	21	2020-09-21-15-55-33	229	262	Template reloc
2020	9	22	0	1	21.221	38.1786	22.7585	13.07	2	6	15	0.21	80	24	58	2020-09-22-00-01-22	230	263	Template reloc
2020	9	23	14	15	12.428	38.175	22.7499	8.79	2.3	6	14	0.48	61	43	41	2020-09-23-14-15-13	125	151	Template reloc
2020	9	23	15	37	45.594	38.1753	22.5942	14.09	2.4	9	12	0.38	87	40	64	2020-09-23-15-37-45	231	264	Template reloc
2020	9	25	4	39	5.628	38.1464	22.6803	14.02	1.4	8	8	0.23	35	79	24	2020-09-25-04-39-05	232	130	Template reloc
2020	9	25	7	8	21.368	38.1452	22.5627	10.77	1.3	10	8	0.37	36	74	23	2020-09-25-07-08-21	233	265	Template reloc
2020	9	25	15	15	48.749	38.0935	22.7679	12.25	1.5	4	9	0.53	40	48	25	2020-09-25-15-15-48	216	247	Template reloc
2020	9	28	13	56	4.081	38.0395	22.8088	15.01	0.7	5	6	0.19	18	75	14	2020-09-28-13-56-04	100	266	Template reloc
2020	10	1	11	50	6.199	38.0971	22.7795	12.85	1.4	4	11	0.26	27	63	18	2020-10-01-11-49-51	12	239	Template reloc
2020	10	1	16	49	52.884	38.1162	22.767	9.93	1.5	4	12	0.37	57	38	35	2020-10-01-16-49-54	234	267	Template reloc
2020	10	2	1	11	34.422	37.9996	22.7664	8.45	0.6	5	2	0.03	19	68	15	2020-10-02-01-11-04	235	268	Template reloc
2020	10	5	2	29	33.774	38.1923	22.7441	13.87	2.1	6	15	0.3	63	30	40	2020-10-05-02-29-35	228	261	Template reloc
2020	10	6	20	45	4.385	38.0612	22.9328	9.47	1.1	2	5	0.28	20	73	16	2020-10-06-20-45-04	34	115	Template reloc
2020	10	6	22	59	16.302	38.1793	22.541	12.21	1	10	13	0.15	23	85	18	2020-10-06-22-59-16	236	269	Template reloc
2020	10	7	23	58	20.378	38.1753	22.7638	12	1.3	6	14	0.34	37	38	31	2020-10-07-23-58-21	237	261	Template reloc
2020	10	8	22	9	9.611	38.1608	22.6026	12.25	1.3	9	10	0.08	24	61	17	2020-10-08-22-09-09	238	270	Template reloc
2020	10	9	22	45	39.154	38.0976	22.8446	10.92	1.6	4	13	0.29	56	65	32	2020-10-09-22-45-40	239	271	Template reloc
2020	10	10	21	58	22.499	38.0271	22.764	10.47	1.4	5	1	0.48	75	35	49	2020-10-10-21-58-23	235	268	Template reloc
2020	10	11	0	42	7.29	38.1845	22.4931	15.35	0.8	10	17	0.24	31	69	21	2020-10-11-00-42-08	240	272	Template reloc
2020	10	11	7	29	52.996	38.1585	22.53	19.1	1	10	13	0.21	21	75	16	2020-10-11-07-29-53	241	273	Template reloc
2020	10	13	10	30	3.131	38.1653	22.6038	11.46	1.9	9	9	0.06	27	63	19	2020-10-13-10-30-02	242	274	Template reloc
2020	10	15	0	23	46.124	38.0266	22.7652	10.29	1	5	3	0.27	25	59	17	2020-10-15-00-23-46	235	268	Template reloc
2020	10	15	6	14	13.702	38.2143	22.6916	12.44	1.5	6	16	0.35	41	45	28	2020-10-15-06-14-13	243	275	Template reloc
2020	10	15	6	14	49.205	38.2228	22.6948	11.17	1.7	6	17	0.38	38	49	26	2020-10-15-06-14-48	244	275	Template reloc
2020	10	16	12	2	0.204002	38.1843	22.7372	14.61	1.4	6	15	0.38	37	38	24	2020-10-16-12-02-00	245	276	Template reloc
2020	10	16	19	15	31.293	38.1744	22.74	16.01	1.3	6	14	0.15	37	43	25	2020-10-16-19-15-29	246	277	Template reloc
2020	10	17	0	42	0.775002	38.0642	22.8972	4.57	1.8	2	7	0.44	65	50	36	2020-10-17-00-41-59	14	236	Template reloc
2020	10	17	3	15	36.961	38.1837	22.4901	5.48	1.2	10	16	0.16	30	71	20	2020-10-17-03-15-18	247	278	Template reloc
2020	10	18	0	21	33.925	38.1617	22.7483	18.23	1.1	6	14	0.31	24	68	16	2020-10-18-00-21-36	248	276	Template reloc
2020	10	18	0	40	38.166	38.142	22.7426	12.8	1.7	6	12	0.3	113	22	64	2020-10-18-00-40-39	249	279	Template reloc
2020	10	18	19	51	38.8	38.0148	23.1755	10.75	1.9	0	18	0.34	59	47	36	2020-10-18-19-51-39	63	71	Template loc
2020	10	19	5	7	6.103	38.0705	22.8398	3.04	1.3	2	10	0.4	23	62	15	2020-10-19-05-06-55	250	280	Template reloc
2020	10	19	21	31	2.258	38.1561	22.6818	13	1.8	8	10	0.25	31	47	20	2020-10-19-21-31-02	251	130	Template reloc
2020	10	21	15	40	22.716	38.1868	22.737	13.9	1.5	6	14	0.4	29	41	22	2020-10-21-15-39-53	246	277	Template reloc
2020	10	21	21	12	59.896	38.1626	22.7496	18.9	1.3	6	13	0.22	25	61	19	2020-10-21-21-13-00	252	281	Template reloc
2020	10	21	23	8	57.369	38.1474	22.6944	12.93	1.5	8	10	0.1	20	101	14	2020-10-21-23-08-59	253	282	Template reloc
2020	10	23	1	47	7.558	38.2183	22.5449	15.31	2.2	10	18	0.55	148	24	83	2020-10-23-01-47-07	254	283	Template reloc
2020	10	24	18	43	51.178	38.0168	22.7767	11.21	1.1	5	3	0.26	30	64	20	2020-10-24-18-43-51	207	249	Template reloc
2020	10	28	5	4	54.619	38.1603	22.7329	15.11	1.5	6	13	0.33	23	71	16	2020-10-28-05-04-54	255	284	Template reloc
2020	10	29	2	41	17.206	38.1914	22.7451	11.74	1.4	6	16	0.19	32	39	23	2020-10-29-02-41-01	256	285	Template reloc
2020	10	29	3	1	0.431	38.1892	22.6391	12.61	1.4	9	12	0.33	29	46	21	2020-10-29-03-01-00	6	10	Template reloc
2020	11	1	4	57	55.418	38.1811	22.738	6.43	1.8	6	15	0.48	44	35	30	2020-11-01-04-57-55	257	286	Template reloc
2020	11	1	22	25	15.753	38.1244	22.7804	11.29	1.2	4	14	0.22	30	50	19	2020-11-01-22-25-15	258	287	Template reloc
2020	11	2	11	2	40.275	38.1007	22.7814	11.23	1.3	4	14	0.26	23	64	16	2020-11-02-11-02-39	100	267	Template reloc
2020	11	4	1	18	54.489	38.1507	22.6803	12.86	0.8	8	9	0.12	20	106	14	2020-11-04-01-18-41	259	288	Template reloc
2020	11	5	12	0	35.015	38.1173	22.847	3.9	1.4	2	12	0.12	19	64	14	2020-11-05-12-00-34	260	289	Template reloc
2020	11	5	21	1	26.978	38.1071	22.8118	13.98	1.5	4	15	0.57	34	58	27	2020-11-05-21-01-26	261	290	Template reloc
2020	11	6	17	9	29.508	38.0292	22.7662	8.92	1.3	5	9	0.31	21	67	16	2020-11-06-17-08-55	235	268	Template reloc
2020	11	8	12	51	53.229	38.1881	22.5555	11.97	1.5	10	13	0.63	52	60	31	2020-11-08-12-51-53	262	291	Template reloc
2020	11	8	17	25	42.097	38.1948	22.548	14.42	2.2	10	14	0.42	70	33	42	2020-11-08-17-25-42	262	291	Template reloc
2020	11	8	22	27	50.184	38.18	22.6415	13.96	1.5	9	11	0.3	64	68	36	2020-11-08-22-27-50	6	31	Template reloc
2020	11	9	0	30	13.778	38.1875	22.5559	13.73	1.1	10	14	0.08	30	67	20	2020-11-09-00-30-12	262	291	Template reloc
2020	11	9	1	51	44.056	38.1921	22.5548	13.6	1.4	10	14	0.24	42	62	27	2020-11-09-01-51-44	262	291	Template reloc
2020	11	9	5	0	53.325	38.1899	22.5551	13.45	1.4	10	14	0.23	36	68	24	2020-11-09-05-00-53	262	292	Template reloc
2020	11	9	6	53	48.589	38.2023	22.6002	10	1.2	10	15	0.22	21	72	17	2020-11-09-06-53-48	263	293	Template reloc
2020	11	9	15	12	36.018	38.1259	22.8078	10.88	1.8	4	14	0.23	54	47	44	2020-11-09-15-12-36	261	290	Template reloc
2020	11	9	23	55	48.364	38.1835	22.5509	10.46	1.3	10	13	0.14	26	68	19	2020-11-09-23-55-48	264	294	Template reloc
2020	11	10	20	14	58.535	38.1157	22.7096	10.18	1.7	8	7	0.67	81	55	47	2020-11-10-20-14-58	265	295	Template reloc
2020	11	11	20	7	22.923	38.1935	22.7324	8.03	2	6	14	0.32	68	33	45	2020-11-11-20-07-24	257	286	Template reloc
2020	11	12	8	32	29.322	38.1906	22.5562	13.62	1.4	10	15	0.16	33	68	25	2020-11-12-08-32-29	262	291	Template reloc
2020	11	12	8	38	18.515	38.2376	22.7667	14.76	2.5	7	11	0.36	97	27	60	2020-11-12-08-38-19	34	41	Template reloc
2020	11	13	2	22	25.394	38.1483	22.6494	11.91	1.3	9	7	0.08	20	84	16	2020-11-13-02-22-25	266	296	Template reloc
2020	11	13	11	45	18.996	38.0782	22.803	11.93	1.2	4	11	0.39	24	54	18	2020-11-13-11-45-18	100	266	Template reloc
2020	11	13	19	52	14.671	38.13	22.6526	8.23	1.5	8	3	0.3	42	32	27	2020-11-13-19-52-16	267	297	Template reloc
2020	11	14	2	16	35.277	38.1286	22.6548	8.89	1.2	8	4	0.39	79	38	43	2020-11-14-02-16-36	267	297	Template reloc
2020	11	14	5	34	26.05	38.2399	22.7993	11.16	1.4	7	10	0.46	68	46	40	2020-11-14-05-34-27	268	298	Template reloc
2020	11	15	1	49	6.616	38.1963	22.555	10.95	1.2	10	14	0.29	42	60	28	2020-11-15-01-48-59	262	299	Template reloc
2020	11	16	18	31	55.898	38.1936	22.549	12.17	1.1	10	14	0.15	39	68	30	2020-11-16-18-31-55	262	300	Template reloc
2020	11	16	18	47	9.524	38.0811	22.6931	9.56	1.3	8	5	0.29	41	64	31	2020-11-16-18-47-08	269	301	Template reloc
2020	11	16	19	57	11.378	38.1875	22.5753	12.94	0.7	10	13	0.54	23	81	17	2020-11-16-19-57-11	270	302	Template reloc
2020	11	17	2	24	44.972	38.1927	22.5478	10.86	1.3	10	14	0.21	54	42	35	2020-11-17-02-24-46	262	292	Template reloc
2020	11	17	4	50	46.444	38.1931	22.5521	12.97	1.9	10	13	0.2	46	61	33	2020-11-17-04-50-48	262	292	Template reloc
2020	11	17	6	19	47.519	38.1906	22.5522	15.06	0.9	10	14	0.09	22	79	17	2020-11-17-06-19-47	262	291	Template reloc
2020	11	17	9	44	13.683	38.1905	22.5472	12.73	1.7	10	15	0.15	33	68	21	2020-11-17-09-44-13	262	303	Template reloc
2020	11	17	17	2	0.601997	38.1884	22.5452	14.1	1.3	10	13	0.35	49	49	29	2020-11-17-17-02-01	262	291	Template reloc
2020	11	17	18	8	11.15	38.1681	22.7052	10.31	1.6	6	12	0.38	46	34	38	2020-11-17-18-08-11	271	304	Template reloc
2020	11	17	18	13	46.224	38.1827	22.5697	12.56	1.2	10	14	0.4	23	73	23	2020-11-17-18-13-46	262	291	Template reloc
2020	11	17	23	24	41.849	38.188	22.5507	13.17	2	10	15	0.18	74	40	40	2020-11-17-23-24-42	262	303	Template reloc
2020	11	18	7	2	51.884	38.1898	22.5529	12.69	1.6	10	14	0.11	33	64	22	2020-11-18-07-02-40	262	291	Template reloc
2020	11	18	7	21	16.859	38.1941	22.5646	9.34	1.4	10	14	0.29	23	67	18	2020-11-18-07-21-16	262	291	Template reloc
2020	11	18	19	29	31.948	38.1523	22.6982	12.27	1.7	8	9	0.3	39	33	28	2020-11-18-19-29-31	253	282	Template reloc
2020	11	19	15	41	54.9	38.2167	22.6591	11.22	1.7	6	16	0.37	34	48	24	2020-11-19-15-41-55	272	305	Template reloc
2020	11	19	23	31	44.632	38.1716	22.7006	3.68	1.4	6	10	0.21	22	80	18	2020-11-19-23-31-44	273	306	Template reloc
2020	11	24	17	39	18.826	38.1967	22.5973	12.53	1.5	10	13	0.3	41	47	29	2020-11-24-17-39-19	274	23	Template reloc
2020	11	26	2	14	31.856	38.003	23.0088	5.5	2	1	3	0.42	67	53	45	2020-11-26-02-14-33	275	307	Template reloc
2020	11	27	10	0	0.306999	38.1436	22.6981	14.2	1.1	8	8	0.23	23	76	17	2020-11-27-10-00-01	276	308	Template reloc
2020	11	28	22	4	48.546	38.027	22.7826	13.71	0.6	5	4	0.13	20	72	15	2020-11-28-22-04-41	207	249	Template reloc
2020	11	28	22	59	7.801	38.0779	22.9033	8.94	1.4	2	9	0.39	55	68	38	2020-11-28-22-59-08	104	127	Template reloc
2020	11	30	1	27	29.833	38.0135	22.7978	15.52	0.9	5	5	0.15	24	54	17	2020-11-30-01-27-31	277	309	Template reloc
2020	12	1	14	49	38.427	38.0858	22.8748	6.47	1	2	6	0.22	21	69	16	2020-12-01-14-49-38	278	245	Template reloc
2020	12	2	4	18	57.798	38.1765	22.7636	5.74	1.3	6	14	0.23	26	97	18	2020-12-02-04-18-57	279	310	Template reloc
2020	12	3	18	14	46.582	38.1586	22.6824	12.34	2.5	8	10	0.24	118	30	73	2020-12-03-18-14-47	232	130	Template reloc
2020	12	4	12	10	7.416	38.0865	22.8173	8.3	1.2	4	13	0.14	31	61	20	2020-12-04-12-10-07	100	266	Template reloc
2020	12	5	18	26	0.487	38.1548	22.4684	12.56	1.9	10	15	0.29	72	37	43	2020-12-05-18-26-00	280	311	Template reloc
2020	12	7	20	13	58.953	38.1361	22.6969	11.74	1.7	8	8	0.53	90	30	51	2020-12-07-20-13-59	281	312	Template reloc
2020	12	8	3	45	1.95	38.0817	22.8414	12.25	0.8	0	12	0.07	18	64	14	2020-12-08-03-44-56	282	245	Template loc
2020	12	8	12	0	17.895	38.1403	22.6821	13.98	1.7	8	9	0.19	50	42	36	2020-12-08-12-00-18	259	288	Template reloc
2020	12	13	2	33	42.023	38.0033	22.9806	4.42	1.8	1	2	0.49	48	50	28	2020-12-13-02-33-43	283	133	Template reloc
2020	12	15	3	41	41.157	38.3947	22.8339	35.39	1.7	0	16	1.5	35	153	24	2020-12-15-03-41-39	284	313	Template loc
2020	12	17	2	19	15.952	38.0077	23.0074	6.35	2.1	1	5	0.38	74	42	48	2020-12-17-02-19-17	285	314	Template reloc
2020	12	18	15	10	34.975	38.1672	22.6428	9.35	0.8	9	10	0.04	19	88	15	2020-12-18-15-10-35	286	315	Template reloc
2020	12	18	16	9	31.601	38.1419	22.6457	13.13	0.9	9	5	0.07	19	77	15	2020-12-18-16-08-52	286	315	Template reloc
2020	12	18	17	41	16.43	38.1635	22.6498	10.13	1.4	9	11	0.4	41	51	25	2020-12-18-17-41-16	286	315	Template reloc
2020	12	20	4	39	27.006	38.1636	22.6427	9.33	1.5	9	9	0.25	76	40	46	2020-12-20-04-39-27	286	315	Template reloc
2020	12	20	17	46	50.651	38.0069	23.0058	5.46	1.8	1	3	0.43	55	54	31	2020-12-20-17-46-51	275	307	Template reloc
2020	12	22	6	47	18.124	38.1621	22.6414	9.8	2	9	10	0.21	52	49	32	2020-12-22-06-47-19	286	316	Template reloc
2020	12	22	7	3	26.129	38.1342	22.6423	12.12	1.2	9	3	0.32	28	70	21	2020-12-22-07-03-26	286	315	Template reloc
2020	12	22	7	52	49.421	38.1557	22.6426	10.92	1.2	9	5	0.57	30	45	20	2020-12-22-07-52-30	286	315	Template reloc
2020	12	22	9	45	46.11	38.1585	22.6429	10.36	1.4	9	8	0.2	37	47	24	2020-12-22-09-45-46	286	316	Template reloc
2020	12	24	22	41	32.713	38.1548	22.74	12.82	1.1	6	13	0.11	22	70	16	2020-12-24-22-41-32	287	317	Template reloc
2020	12	24	22	43	7.57	38.154	22.7449	12.36	1.6	6	13	0.22	62	53	37	2020-12-24-22-43-00	287	317	Template reloc
2020	12	26	0	33	9.125	38.0017	22.7808	10.91	1.1	5	3	0.18	20	80	15	2020-12-26-00-32-56	193	231	Template reloc
2020	12	26	2	47	2.591	38.1518	22.6514	9.1	1.6	9	8	0.13	23	85	17	2020-12-26-02-47-02	288	318	Template reloc
2020	12	26	3	31	12.278	38.0897	22.7657	9.61	2.4	4	9	0.33	66	46	39	2020-12-26-03-31-13	289	319	Template reloc
2020	12	26	5	49	53.107	38.1412	22.7827	10.27	0.9	4	15	0.09	21	73	15	2020-12-26-05-49-37	100	160	Template reloc
2020	12	26	6	8	2.552	38.1567	22.6416	11.1	0.8	9	8	0.03	18	114	14	2020-12-26-06-07-59	286	320	Template reloc
2020	12	26	9	27	55.384	38.1766	22.7349	13.95	1.6	6	17	0.14	23	92	16	2020-12-26-09-27-55	229	321	Template reloc
2020	12	26	13	31	24.805	38.1555	22.6431	11.39	1.3	9	9	0.08	23	80	16	2020-12-26-13-31-24	286	322	Template reloc
2020	12	27	9	58	57.924	38.0098	22.7212	12.58	1.1	5	4	0.08	20	118	15	2020-12-27-09-58-40	290	323	Template reloc
2020	12	29	5	33	35.068	38.1336	22.6858	8.72	1.9	8	6	0.26	39	46	30	2020-12-29-05-33-34	291	324	Template reloc
2020	12	29	19	19	55.527	38.1722	22.7121	12.98	1.7	6	14	0.31	45	55	35	2020-12-29-19-19-56	292	325	Template reloc
2020	12	30	18	42	31.455	38.1639	22.7134	13.05	1.1	6	12	0.11	19	86	15	2020-12-30-18-42-17	292	325	Template reloc
2020	12	30	19	55	25.739	38.184	22.6565	8.71	1.9	9	12	0.37	29	85	19	2020-12-30-19-55-25	293	326	Template reloc
2020	12	31	5	41	41.789	38.1596	22.6532	13.23	1.4	9	9	0.23	24	85	17	2020-12-31-05-41-34	294	327	Template reloc
2021	1	1	6	18	52.629	38.1556	22.6404	10.78	1.5	9	8	0.31	25	61	23	2021-01-01-06-18-52	295	328	Template reloc
2021	1	3	19	50	12.018	38.1656	22.64	10.63	1.5	9	8	0.38	65	47	42	2021-01-03-19-49-30	296	329	Template reloc
2021	1	7	6	46	43.182	38.1581	22.6389	11.01	2.1	9	8	0.15	36	48	23	2021-01-07-06-46-43	286	320	Template reloc
2021	1	8	19	0	40.569	38.1728	22.6171	11.34	1.5	9	10	0.18	34	47	25	2021-01-08-19-00-40	297	330	Template reloc
2021	1	9	14	42	7.646	38.1563	22.6409	11.14	2.2	9	9	0.25	76	48	49	2021-01-09-14-42-07	286	331	Template reloc
2021	1	9	18	18	6.483	38.1634	22.6323	10.1	1.3	9	8	0.33	33	46	21	2021-01-09-18-18-06	286	331	Template reloc
2021	1	9	22	37	51.005	38.163	22.6388	10.17	1.5	9	9	0.09	49	47	29	2021-01-09-22-37-47	286	332	Template reloc
2021	1	9	23	58	35.725	38.1597	22.6412	10.86	1.5	9	9	0.22	48	47	28	2021-01-09-23-58-35	286	331	Template reloc
2021	1	10	0	22	44.015	38.1569	22.6445	11.79	1.6	9	9	0.1	33	48	25	2021-01-10-00-22-43	286	322	Template reloc
2021	1	10	0	24	39.43	38.1649	22.6401	10.01	1.6	9	11	0.31	44	49	28	2021-01-10-00-24-40	286	332	Template reloc
2021	1	10	4	11	5.361	38.1659	22.6376	10.66	1.7	9	10	0.34	93	39	56	2021-01-10-04-11-05	286	332	Template reloc
2021	1	10	5	4	0.897003	38.1558	22.6384	10.59	0.8	9	9	0.05	18	115	14	2021-01-10-05-04-01	286	331	Template reloc
2021	1	10	10	28	6.708	38.157	22.6476	10.7	1.4	9	9	0.17	42	48	28	2021-01-10-10-28-01	286	322	Template reloc
2021	1	10	21	12	35.554	38.1433	22.6407	13.02	1.6	9	7	0.19	25	76	19	2021-01-10-21-12-35	286	316	Template reloc
2021	1	13	8	45	7.53	38.1807	22.7056	4.46	1.6	6	13	0.1	21	101	15	2021-01-13-08-45-03	273	306	Template reloc
2021	1	13	17	26	28.688	38.1691	22.5783	12.04	1.6	10	11	0.18	52	60	35	2021-01-13-17-26-25	298	333	Template reloc
2021	1	19	8	29	30.676	38.1835	22.5667	12.07	2.6	10	13	0.13	53	49	31	2021-01-19-08-29-31	299	334	Template reloc
2021	1	19	16	22	18.429	38.1868	22.5658	11.68	2.2	10	13	0.45	58	46	40	2021-01-19-16-22-19	299	334	Template reloc
2021	1	19	20	32	56.535	38.1708	22.5693	13.38	1.4	10	12	0.1	20	103	16	2021-01-19-20-32-56	299	334	Template reloc
2021	1	20	10	41	39.853	38.0898	22.8371	12.08	2.9	4	11	0.34	90	29	63	2021-01-20-10-41-41	100	266	Template reloc
2021	1	24	19	39	39.078	38.194	22.5424	15.18	2.1	10	14	0.27	52	76	31	2021-01-24-19-39-39	300	335	Template reloc
2021	1	26	7	30	38.554	38.158	22.6412	9.79	1.6	9	8	0.35	51	46	29	2021-01-26-07-30-08	301	336	Template reloc
2021	1	29	17	0	27.015	38.1949	22.7411	11.1	1.6	6	16	0.33	44	58	28	2021-01-29-17-00-28	302	281	Template reloc
2021	1	31	19	44	23.812	38.1491	22.6158	13.99	1.1	9	9	0.23	20	92	15	2021-01-31-19-44-26	303	337	Template reloc
2021	1	31	22	12	4.886	38.3222	22.8486	19.96	1.7	0	8	0.43	47	148	31	2021-01-31-22-12-05	304	338	Template loc
2021	2	1	4	15	57.007	38.0834	22.8937	9.44	1.7	2	10	0.35	52	52	32	2021-02-01-04-15-57	305	339	Template reloc
2021	2	2	5	52	39.368	38.1394	22.6684	11.39	1.5	8	7	0.35	24	76	17	2021-02-02-05-52-01	306	340	Template reloc
2021	2	4	22	16	35.008	38.147	22.6158	9.01	1.3	9	8	0.44	37	56	24	2021-02-04-22-16-35	307	341	Template reloc
2021	2	12	6	41	44.665	38.1184	22.7054	13.08	1.7	8	8	0.13	24	93	17	2021-02-12-06-41-44	153	178	Template reloc
2021	2	13	14	37	38.711	38.2169	22.5601	11.34	1.5	10	16	0.32	34	52	22	2021-02-13-14-37-38	308	342	Template reloc
2021	2	16	3	4	59.454	38.1893	22.7324	13.94	2.2	6	15	0.34	64	43	44	2021-02-16-03-05-00	229	343	Template reloc
2021	2	16	3	29	10.741	38.1761	22.7324	15.71	2.4	6	15	0.3	74	36	53	2021-02-16-03-29-11	229	343	Template reloc
2021	2	16	19	1	28.728	38.1324	22.6241	11.46	1.3	9	6	0.17	21	89	15	2021-02-16-19-01-09	309	344	Template reloc
2021	2	17	19	27	7.432	38.1526	22.6227	11.32	1.8	9	11	0.41	27	69	19	2021-02-17-19-27-08	310	345	Template reloc
2021	2	18	18	58	50.649	38.0449	22.8125	12.12	1.4	5	6	0.38	24	68	24	2021-02-18-18-58-50	14	20	Template reloc
2021	2	20	10	57	56.801	38.1501	22.6266	9.72	1.6	9	8	0.66	80	36	47	2021-02-20-10-57-57	311	346	Template reloc
2021	2	20	20	32	7.127	38.1492	22.6275	9.99	1.6	9	8	0.42	93	34	56	2021-02-20-20-32-07	311	346	Template reloc
2021	2	21	3	54	25.929	38.1496	22.6296	9.43	1.3	9	7	0.36	44	56	28	2021-02-21-03-54-26	311	346	Template reloc
2021	2	21	4	8	11.158	38.126	22.6898	12.35	1.6	8	6	0.28	46	46	27	2021-02-21-04-08-11	312	347	Template reloc
2021	2	21	19	33	17.39	38.2174	22.5861	9.55	1.3	10	16	0.23	23	102	16	2021-02-21-19-33-19	313	165	Template reloc
2021	2	22	18	3	18.769	38.1508	22.6269	10.2	1	9	8	0.14	23	78	16	2021-02-22-18-03-20	311	346	Template reloc
2021	2	26	5	0	32.045	38.1467	22.6385	11.24	1.3	9	8	0.11	21	87	15	2021-02-26-05-00-32	314	348	Template reloc
2021	2	27	4	23	42.993	38.1803	22.5805	8.95	1.2	10	12	0.11	27	64	21	2021-02-27-04-23-42	315	349	Template reloc
2021	2	27	10	46	53.494	38.1512	22.6381	10.88	1.6	9	7	0.59	73	37	42	2021-02-27-10-46-53	314	348	Template reloc
2021	2	27	18	27	25.862	38.0946	22.8397	11.42	1.1	4	13	0.6	41	64	25	2021-02-27-18-27-26	316	350	Template reloc
2021	2	27	21	29	7.433	38.1457	22.6426	10.01	1.1	9	8	0.32	65	44	36	2021-02-27-21-29-07	317	351	Template reloc
2021	3	2	8	23	48.424	38.0963	22.8032	5.27	1.4	4	13	0.31	21	62	15	2021-03-02-08-23-33	318	352	Template reloc
2021	3	4	12	25	22.01	38.0073	22.7279	17.09	0.6	5	3	0.13	18	117	14	2021-03-04-12-24-41	319	353	Template reloc
2021	3	6	6	19	29.97	38.1694	22.7303	15.55	1.7	6	14	0.4	23	73	16	2021-03-06-06-19-29	229	343	Template reloc
2021	3	6	13	20	19.357	38.1804	22.7336	15.89	1.9	6	14	0.4	59	44	37	2021-03-06-13-20-01	229	343	Template reloc
2021	3	7	6	45	4.126	38.1767	22.7334	14.85	1.8	6	15	0.19	24	71	17	2021-03-07-06-45-03	229	354	Template reloc
2021	3	7	23	38	10.911	38.1741	22.7516	15.29	2.3	6	14	0.44	66	49	49	2021-03-07-23-38-11	229	343	Template reloc
2021	3	13	4	10	41.294	38.0931	22.8142	11.07	1.2	4	11	0.38	27	60	20	2021-03-13-04-10-40	100	266	Template reloc
2021	3	13	22	24	7.54	37.9643	23.1335	13.18	1.3	0	14	0.18	46	70	32	2021-03-13-22-24-07	63	71	Template loc
2021	3	15	22	28	48.51	38.1948	22.7358	4.28	2.9	6	15	0.35	85	43	49	2021-03-15-22-28-49	229	343	Template reloc
2021	3	16	11	39	17.022	38.1858	22.7351	13.72	2.1	6	16	0.36	46	44	36	2021-03-16-11-39-17	229	355	Template reloc
2021	3	17	6	39	32.053	38.1926	22.7424	5.18	2	6	15	0.44	43	43	25	2021-03-17-06-39-32	229	343	Template reloc
2021	3	17	7	44	23.489	38.1961	22.7434	2.4	2.2	6	15	0.41	34	57	20	2021-03-17-07-44-25	229	356	Template reloc
2021	3	17	11	25	24.079	38.1954	22.7372	7.75	2.2	6	15	0.33	50	44	28	2021-03-17-11-25-24	229	355	Template reloc
2021	3	17	14	32	32.831	38.184	22.7387	14.39	1.7	6	13	0.28	43	54	26	2021-03-17-14-32-07	229	355	Template reloc
2021	3	17	14	34	53.317	38.1776	22.747	14.94	1.6	6	16	0.25	16	104	16	2021-03-17-14-34-53	229	355	Template reloc
2021	3	17	19	48	8.663	38.1477	22.6905	12.92	1.5	8	8	0.31	28	55	19	2021-03-17-19-48-08	153	178	Template reloc
2021	3	18	6	37	22.698	38.1397	22.8293	10.44	1.1	4	15	0.44	20	69	14	2021-03-18-06-37-24	320	357	Template reloc
2021	3	20	4	32	9.64	38.0353	23.0914	4.41	1.4	0	12	0.15	29	69	22	2021-03-20-04-32-09	63	71	Template loc
2021	3	20	4	39	43.03	38.0414	23.087	3.45	1.4	0	11	0.3	31	90	19	2021-03-20-04-39-43	63	71	Template loc
2021	3	20	5	9	9.11	38.1264	23.0646	13.38	1.7	0	14	0.39	58	51	37	2021-03-20-05-09-09	63	71	Template loc
2021	3	20	21	21	2.498	38.221	22.6175	11.32	2	10	16	0.32	73	43	46	2021-03-20-21-21-02	321	358	Template reloc
2021	3	21	16	11	30.054	38.1407	22.8248	9.29	0.8	0	15	0.14	18	70	14	2021-03-21-16-11-04	322	237	Template loc
2021	3	22	4	25	39.864	38.1941	22.7448	9.98	1.6	6	15	0.33	23	68	17	2021-03-22-04-25-39	323	359	Template reloc
2021	3	24	2	57	17.919	38.1315	22.4568	8.41	2.5	0	16	0.57	30	75	21	2021-03-24-02-57-17	324	360	Template loc
2021	3	25	2	51	47.18	38.1846	22.7321	14.81	1.5	6	14	0.44	37	48	23	2021-03-25-02-51-47	229	354	Template reloc
2021	3	27	8	2	17.216	38.1698	22.7396	14.6	1.1	6	13	0.14	27	56	18	2021-03-27-08-02-16	229	361	Template reloc
2021	3	27	15	27	19.102	38.1767	22.7476	17.32	1.5	6	16	0.45	45	44	30	2021-03-27-15-27-19	325	356	Template reloc
2021	3	29	19	40	59.543	38.1493	22.6266	11.82	1.5	9	9	0.14	25	80	20	2021-03-29-19-40-59	326	362	Template reloc
2021	3	30	4	15	28.095	38.0743	22.6673	7.8	1.1	8	3	0.35	20	71	15	2021-03-30-04-15-24	327	363	Template reloc
2021	4	2	22	24	24.312	38.1906	22.7341	12.84	1.3	6	15	0.3	48	45	33	2021-04-02-22-24-24	229	355	Template reloc
2021	4	4	0	19	11.666	38.1895	22.7258	11.2	1.7	6	15	0.18	32	56	24	2021-04-04-00-19-12	229	361	Template reloc
2021	4	6	21	59	2.45	38.1819	22.6179	11.1	1.6	9	12	0.12	24	49	18	2021-04-06-21-59-01	328	364	Template reloc
2021	4	7	0	44	27.333	38.1714	22.6363	10.66	2	9	10	0.38	38	48	28	2021-04-07-00-44-27	329	365	Template reloc
2021	4	8	7	15	50.089	38.1973	22.7407	3.3	1.9	6	15	0.42	24	82	20	2021-04-08-07-15-50	330	366	Template loc
2021	4	8	10	24	45.46	38.3052	22.5635	21.49	1.6	0	13	0.17	27	114	19	2021-04-08-10-24-45	331	367	Template loc
2021	4	8	11	56	55.658	38.1649	22.7536	14.22	1.8	6	14	0.47	39	43	28	2021-04-08-11-56-55	330	366	Template reloc
2021	4	11	20	42	53.9	37.9591	23.028	9.63	1.3	0	4	0.69	23	85	17	2021-04-11-20-42-53	63	225	Template loc
2021	4	13	0	28	29.417	38.1185	22.7593	12.61	2.1	4	11	0.27	88	39	51	2021-04-13-00-28-30	332	368	Template reloc
2021	4	13	14	41	38.11	37.9769	23.1529	10.5	2.1	0	16	0.36	79	52	45	2021-04-13-14-41-38	63	71	Template loc
2021	4	14	6	43	51.36	38.2399	22.6997	8.44	1.1	6	17	0.19	17	118	14	2021-04-14-06-43-50	229	361	Template loc
2021	4	14	12	33	13.598	38.1797	22.7352	15.59	1.5	6	14	0.33	28	57	18	2021-04-14-12-33-14	229	361	Template reloc
2021	4	16	2	11	18.631	38.1241	22.9025	12.07	0.9	2	11	0.83	45	48	29	2021-04-16-02-10-58	333	369	Template reloc
2021	4	19	9	33	9.43	38.0004	23.0803	11.01	0.9	0	8	0.23	20	88	14	2021-04-19-09-32-48	63	71	Template loc
2021	4	19	13	36	20.613	38.0126	22.7929	11.54	1.7	5	3	0.33	62	68	38	2021-04-19-13-36-20	334	370	Template reloc
2021	4	19	23	53	14.824	38.188	22.7301	14.42	1.5	6	15	0.32	27	58	18	2021-04-19-23-53-15	246	277	Template reloc
2021	4	21	15	25	18.016	38.1959	22.7295	5.84	1.9	6	14	0.47	47	62	33	2021-04-21-15-25-19	229	361	Template reloc
2021	4	24	3	12	47.367	38.1079	22.6793	9.12	1	8	5	0.25	38	44	24	2021-04-24-03-12-46	335	371	Template reloc
2021	4	24	9	0	39.537	38.0098	22.7883	12.41	0.8	5	4	0.15	20	71	14	2021-04-24-09-00-28	334	370	Template reloc
2021	4	24	13	56	34.851	38.1662	22.9377	7.47	1.6	0	11	0.36	53	57	33	2021-04-24-13-56-36	336	372	Template loc
2021	4	24	21	14	12.68	38.2565	22.6228	12.26	1.5	10	19	0.27	59	52	35	2021-04-24-21-14-12	337	373	Template reloc
2021	4	25	6	7	15.22	37.9916	23.1031	6.48	1.3	0	10	0.15	20	97	14	2021-04-25-06-07-17	63	71	Template loc
2021	4	25	8	49	28.481	38.1696	22.7114	11.08	1.7	6	13	0.41	55	45	32	2021-04-25-08-49-00	271	304	Template reloc
2021	4	25	10	24	58.566	38.1892	22.7303	13.2	1.4	6	13	0.5	38	74	24	2021-04-25-10-24-58	229	361	Template reloc
2021	4	25	11	32	30.49	38.0034	23.0927	8.11	1.1	0	11	0.42	20	97	14	2021-04-25-11-31-56	63	71	Template loc
2021	4	25	12	34	9.36	37.9803	23.1133	3.89	2	0	12	0.4	75	49	47	2021-04-25-12-34-08	63	71	Template loc
2021	4	25	13	19	44.91	37.9918	23.1025	5.65	1.8	0	11	0.43	67	47	43	2021-04-25-13-19-46	63	71	Template loc
2021	4	25	14	26	23.45	37.9924	23.1045	6.57	1.1	0	10	0.32	20	98	14	2021-04-25-14-25-57	63	71	Template loc
2021	4	25	14	47	20.89	37.9985	23.0892	8.77	1.1	0	10	0.32	21	92	15	2021-04-25-14-47-21	63	71	Template loc
2021	4	25	18	13	6.187	38.1432	22.7803	12.59	1.5	4	15	0.28	60	49	38	2021-04-25-18-13-06	338	374	Template reloc
2021	4	25	18	32	50.4	37.9871	23.1101	5.25	0.9	0	13	0.49	27	70	20	2021-04-25-18-32-50	63	71	Template loc
2021	4	26	1	52	22.73	37.9934	23.1026	6.21	1.3	0	12	0.27	41	73	25	2021-04-26-01-52-23	63	71	Template loc
2021	4	26	2	14	32.59	37.9933	23.1036	5.28	1.7	0	11	0.36	74	47	45	2021-04-26-02-14-33	63	71	Template loc
2021	4	26	2	55	17.84	37.9989	23.0953	4.94	1.4	0	10	0.37	42	57	25	2021-04-26-02-55-19	63	71	Template loc
2021	4	26	22	17	7.399	38.181	23.0586	3.1	1.1	0	17	0.31	20	65	16	2021-04-26-22-17-06	339	375	Template loc
2021	4	27	13	47	13.956	38.1138	22.8302	6.1	1	4	11	0.52	22	61	16	2021-04-27-13-47-13	340	280	Template reloc
2021	4	27	21	14	41.18	38.0456	23.0866	4.16	1.6	0	10	0.44	65	52	42	2021-04-27-21-14-42	63	71	Template loc
2021	4	28	20	41	50.713	38.1834	22.7342	14.02	2.6	6	15	0.35	101	36	57	2021-04-28-20-41-51	229	355	Template reloc
2021	4	29	18	27	7.729	38.1057	22.678	8.01	1.1	8	4	0.26	25	66	17	2021-04-29-18-27-08	341	376	Template reloc
2021	5	3	16	47	53.061	38.0161	22.999	5.49	1.4	1	4	0.42	30	82	20	2021-05-03-16-47-35	342	102	Template reloc
2021	5	4	3	45	42.448	38.0181	22.7867	11.53	1	5	3	0.2	30	110	21	2021-05-04-03-45-42	334	370	Template reloc
2021	5	5	1	53	35.561	38.1818	22.6375	13.82	1.1	9	12	0.19	35	50	22	2021-05-05-01-52-48	343	21	Template reloc
2021	5	5	18	42	52.86	38.2756	22.6924	15.15	1.6	7	18	0.23	48	53	31	2021-05-05-18-42-44	344	377	Template reloc
2021	5	5	21	3	0.294998	38.2759	22.694	14.55	1.2	7	17	0.25	20	75	16	2021-05-05-21-02-46	344	377	Template reloc
2021	5	7	9	17	37.017	38.2057	22.7541	9.65	1.3	6	13	0.16	20	109	16	2021-05-07-09-17-37	222	255	Template reloc
2021	5	9	8	18	55.331	38.1677	22.6369	15.01	1.5	9	10	0.14	26	82	17	2021-05-09-08-18-54	345	35	Template reloc
2021	5	10	8	3	36.98	38.2919	22.7183	15.13	1.6	7	16	0.22	24	150	18	2021-05-10-08-03-33	344	377	Template reloc
2021	5	10	11	38	56.382	38.1899	22.7356	14.13	1.6	6	15	0.14	21	70	16	2021-05-10-11-38-56	246	277	Template reloc
2021	5	10	18	27	5.09	38.1173	22.6904	15.07	1	8	6	0.48	20	72	15	2021-05-10-18-27-07	346	378	Template reloc
2021	5	11	1	57	3.552	38.1026	22.6893	9.72	1.1	8	6	0.06	20	76	15	2021-05-11-01-57-03	347	379	Template reloc
2021	5	11	8	23	45.92	37.9775	23.1155	1.93	1.9	0	13	0.8	44	69	27	2021-05-11-08-23-47	63	71	Template loc
2021	5	11	21	48	47.092	38.2826	22.6866	13.42	1.1	7	19	0.28	27	71	18	2021-05-11-21-48-46	344	377	Template reloc
2021	5	12	16	54	3.788	38.1672	22.6933	11.11	1.6	6	11	0.18	41	40	32	2021-05-12-16-54-01	120	143	Template reloc
2021	5	12	21	49	11.541	38.1952	22.7498	12.96	1.4	6	16	0.51	34	59	21	2021-05-12-21-49-11	330	366	Template reloc
2021	5	14	13	14	38.141	38.2	22.7126	10.19	1.7	6	15	0.6	50	45	30	2021-05-14-13-14-39	348	380	Template reloc
2021	5	15	0	6	58.74	38.0292	22.7949	13.2	0.8	5	4	0.11	23	71	16	2021-05-15-00-06-52	349	219	Template reloc
2021	5	16	18	23	20.738	38.1438	22.6899	13.63	1.2	8	9	0.05	20	82	15	2021-05-16-18-23-18	346	378	Template reloc
2021	5	17	1	52	38.855	38.1304	22.6753	7.52	1.1	8	6	0.14	21	79	15	2021-05-17-01-52-36	350	376	Template reloc
2021	5	18	23	55	3.816	38.1857	22.6946	13.28	1.4	6	13	0.27	64	55	39	2021-05-18-23-55-03	351	381	Template reloc
2021	5	23	4	30	57.153	38.0175	22.7832	11.1	1.2	5	3	0.34	36	58	23	2021-05-23-04-30-57	352	382	Template reloc
2021	5	23	9	13	8.446	38.0839	23.0747	3.35	0.8	0	12	0.08	18	103	14	2021-05-23-09-13-10	63	71	Template loc
2021	5	24	22	43	41.536	38.1283	22.7066	12.31	1.1	8	8	0.24	35	48	22	2021-05-24-22-43-42	353	61	Template reloc
2021	5	25	23	11	29.891	38.1115	22.8805	8.71	0.9	2	12	0.24	34	71	21	2021-05-25-23-11-29	354	383	Template reloc
2021	5	28	18	54	24.532	38.0767	22.8777	9.97	1.4	3	10	0.28	39	67	31	2021-05-28-18-54-24	355	357	Template reloc
2021	5	28	23	46	54.067	38.1468	22.603	11.72	1	9	7	0.4	48	57	28	2021-05-28-23-46-53	356	384	Template reloc
2021	5	29	1	56	36.443	38.171	22.6728	11.49	1.1	8	11	0.45	79	36	46	2021-05-29-01-56-36	357	385	Template reloc
2021	5	30	1	56	9.368	38.1095	22.8287	7.65	0.6	4	15	0.29	19	64	14	2021-05-30-01-55-40	340	280	Template reloc
2021	5	30	22	29	54.239	38.146	22.6349	14.6	1.3	9	6	0.08	20	53	17	2021-05-30-22-29-53	358	386	Template reloc
2021	6	1	2	3	58.084	38.0891	22.766	9.59	0.9	4	11	0.2	20	65	15	2021-06-01-02-03-27	359	387	Template reloc
2021	6	1	14	58	3.148	38.1718	22.6558	8.35	1.4	9	11	0.22	25	87	17	2021-06-01-14-57-25	360	296	Template reloc
2021	6	2	3	17	39.34	38.032	23.0976	3.3	1.3	0	9	0.4	22	67	16	2021-06-02-03-17-42	63	71	Template loc
2021	6	4	17	25	47.382	38.1884	22.7364	13.66	1.6	6	15	0.31	31	40	20	2021-06-04-17-25-48	229	361	Template reloc
2021	6	4	21	3	4.19	38.1909	22.7472	3.01	1.1	6	15	0.51	19	95	14	2021-06-04-21-03-00	229	388	Template loc
2021	6	6	19	26	31.64	37.9914	23.0721	6.61	1.2	0	9	0.5	23	77	16	2021-06-06-19-26-33	63	71	Template loc
2021	6	8	2	54	17.597	38.1163	22.6853	9.16	0.9	8	5	0.11	25	68	17	2021-06-08-02-54-16	347	379	Template reloc
2021	6	8	21	3	57.448	38.0794	22.8583	11.72	0.6	3	9	0.65	19	55	14	2021-06-08-21-03-24	361	389	Template reloc
