# Supplementary material for: Cluster Analysis of Seismicity in the Eastern Gulf of Corinth Based on a Waveform Template Matching Catalog
Source: Sensors (Basel). 2023 Mar 8;23(6):2923. doi: 10.3390/s23062923 (PMC10056727; doi:10.3390/s23062923)
Supplement: Supplementary file 1 [file sensors-23-02923-s001.zip › E2_CAT2_perachora_LTK-detections_fixed-locations.xlsx]

## Sheet: Sheet1
Year	Month	Day	Hour	Min	Sec	Latitude	Longitude	Depth	Magnitude	Type	event-code	template code	near C0.64	spatial ID	far C0.50	far C0.60	far C0.70	far C0.80	far C0.90	Description	avg.Corr.Coef.
2020	1	1	1	34	8.131	38.1782	22.7135	6.23	0.6	2	2020-01-01-01-34-08	2020-01-18-00-45-42	1	6	1	1	1	1	1	Detection fixed reloc	0.602
2020	1	1	2	2	57.622	38.0444	22.9008	12.66	-0.4	2	2020-01-01-02-02-57	2020-07-21-02-59-28	2	3	2	2	2	2	2	Detection fixed reloc	0.7
2020	1	1	3	25	48.197	38.1064	22.7453	30.81	0.2	2	2020-01-01-03-25-48	2020-01-25-23-14-33	1	8	3	3	3	3	3	Detection fixed reloc	0.604
2020	1	1	3	30	15.707	38.0272	22.9624	8.06	0.6	2	2020-01-01-03-30-15	2020-03-20-01-36-14	2	1	4	4	4	4	4	Detection fixed reloc	0.612
2020	1	1	11	9	35.134	38.0336	22.9426	7.79	1	2	2020-01-01-11-09-35	2020-07-06-19-54-03	2	1	5	5	5	5	5	Detection fixed reloc	0.604
2020	1	1	12	13	15.095	38.1384	22.615	8.57	1.1	2	2020-01-01-12-13-15	2020-01-10-07-52-08	3	9	6	6	6	6	6	Detection fixed reloc	0.836
2020	1	1	12	25	8.355	38.1384	22.615	8.57	0.9	2	2020-01-01-12-25-08	2020-01-10-07-52-08	3	9	6	6	6	6	6	Detection fixed reloc	0.68
2020	1	1	16	15	55.715	38.1384	22.615	8.57	0.5	2	2020-01-01-16-15-55	2020-01-10-07-52-08	3	9	6	6	6	6	6	Detection fixed reloc	0.616
2020	1	1	18	35	24.555	38.1732	22.7374	18.07	0.9	2	2020-01-01-18-35-24	2020-01-01-22-36-39	1	6	7	7	7	7	7	Detection fixed reloc	0.656
2020	1	1	19	31	24.155	38.1732	22.7374	18.07	0.8	2	2020-01-01-19-31-24	2020-01-01-22-36-39	1	6	7	7	7	7	7	Detection fixed reloc	0.761
2020	1	1	21	31	57.991	38.0567	22.8827	13.13	0.3	2	2020-01-01-21-31-57	2020-07-22-19-28-57	4	3	8	8	8	8	8	Detection fixed reloc	0.625
2020	1	1	22	36	39.235	38.1732	22.7374	18.07	2	1	2020-01-01-22-36-39	2020-01-01-22-36-39	1	6	7	7	7	7	7	Template reloc	1
2020	1	1	22	39	18.495	38.1732	22.7374	18.07	0.9	2	2020-01-01-22-39-18	2020-01-01-22-36-39	1	6	7	7	7	7	7	Detection fixed reloc	0.801
2020	1	1	22	48	27.495	38.1732	22.7374	18.07	0.5	2	2020-01-01-22-48-27	2020-01-01-22-36-39	1	6	7	7	7	7	7	Detection fixed reloc	0.724
2020	1	2	0	0	43.162	38.1803	22.7285	13.3	0.6	2	2020-01-02-00-00-43	2020-01-22-16-33-56	1	6	9	9	9	9	9	Detection fixed reloc	0.76
2020	1	2	1	3	48.591	38.1869	22.7195	12.36	1	2	2020-01-02-01-03-48	2020-01-24-09-06-05	1	6	10	10	10	10	10	Detection fixed reloc	0.644
2020	1	2	11	52	46.464	38.0931	22.8142	11.07	1.4	2	2020-01-02-11-52-46	2021-03-13-04-10-40	5	4	11	11	11	11	11	Detection fixed reloc	0.71
2020	1	2	13	7	21.571	38.1869	22.7195	12.36	0.6	2	2020-01-02-13-07-21	2020-01-24-09-06-05	1	6	10	10	10	10	10	Detection fixed reloc	0.613
2020	1	2	22	42	27.16	38.1876	22.7203	11.26	1	2	2020-01-02-22-42-27	2020-01-17-15-51-20	1	6	10	10	10	12	12	Detection fixed reloc	0.611
2020	1	3	0	41	41.04	38.0817	22.8414	12.25	1.1	2	2020-01-03-00-41-41	2020-12-08-03-44-56	6	0	12	12	12	13	13	Detection fixed loc	0.607
2020	1	3	7	10	3.655	38.1732	22.7374	18.07	1.7	2	2020-01-03-07-10-03	2020-01-01-22-36-39	1	6	7	7	7	7	7	Detection fixed reloc	0.768
2020	1	3	7	32	44.766	38.0759	22.8414	12.59	0.5	2	2020-01-03-07-32-44	2020-09-07-00-54-21	7	3	12	13	13	14	14	Detection fixed reloc	0.617
2020	1	3	16	13	8.38	38.1876	22.7203	11.26	0.5	2	2020-01-03-16-13-08	2020-01-17-15-51-20	1	6	10	10	10	12	12	Detection fixed reloc	0.801
2020	1	3	16	25	6.04	38.1876	22.7203	11.26	0.7	2	2020-01-03-16-25-06	2020-01-17-15-51-20	1	6	10	10	10	12	12	Detection fixed reloc	0.615
2020	1	3	17	1	46.176	38.0134	23.0053	6.71	0	2	2020-01-03-17-01-46	2020-01-09-20-40-32	8	1	13	14	14	15	15	Detection fixed reloc	0.629
2020	1	3	17	6	42.836	38.0134	23.0053	6.71	-0.1	2	2020-01-03-17-06-42	2020-01-09-20-40-32	8	1	13	14	14	15	15	Detection fixed reloc	0.619
2020	1	3	17	42	30.86	38.1876	22.7203	11.26	0.7	2	2020-01-03-17-42-30	2020-01-17-15-51-20	1	6	10	10	10	12	12	Detection fixed reloc	0.611
2020	1	3	18	59	53.331	38.1869	22.7195	12.36	0.7	2	2020-01-03-18-59-53	2020-01-24-09-06-05	1	6	10	10	10	10	10	Detection fixed reloc	0.603
2020	1	4	1	24	1.26	38.1876	22.7203	11.26	0.3	2	2020-01-04-01-24-01	2020-01-17-15-51-20	1	6	10	10	10	12	12	Detection fixed reloc	0.706
2020	1	4	3	5	23.856	38.0134	23.0053	6.71	0.4	2	2020-01-04-03-05-23	2020-01-09-20-40-32	8	1	13	14	14	15	15	Detection fixed reloc	0.697
2020	1	4	8	30	31.036	38.0134	23.0053	6.71	0	2	2020-01-04-08-30-31	2020-01-09-20-40-32	8	1	13	14	14	15	15	Detection fixed reloc	0.74
2020	1	4	9	16	43.716	38.0134	23.0053	6.71	-0.1	2	2020-01-04-09-16-43	2020-01-09-20-40-32	8	1	13	14	14	15	15	Detection fixed reloc	0.77
2020	1	4	14	19	21.666	38.0532	22.8755	9.14	-0.2	2	2020-01-04-14-19-21	2020-07-20-15-03-27	2	3	2	2	2	16	16	Detection fixed reloc	0.849
2020	1	4	18	12	59.276	38.0134	23.0053	6.71	-0.4	2	2020-01-04-18-12-59	2020-01-09-20-40-32	8	1	13	14	14	15	15	Detection fixed reloc	0.681
2020	1	5	4	0	5.612	38.2011	22.7355	7.1	0.6	2	2020-01-05-04-00-05	2020-01-17-19-10-15	1	6	7	7	15	17	17	Detection fixed reloc	0.85
2020	1	5	5	17	34.396	38.0134	23.0053	6.71	0.3	2	2020-01-05-05-17-34	2020-01-09-20-40-32	8	1	13	14	14	15	15	Detection fixed reloc	0.687
2020	1	6	8	49	25.776	38.0134	23.0053	6.71	0.3	2	2020-01-06-08-49-25	2020-01-09-20-40-32	8	1	13	14	14	15	15	Detection fixed reloc	0.691
2020	1	7	0	14	58.776	38.0134	23.0053	6.71	0.4	2	2020-01-07-00-14-58	2020-01-09-20-40-32	8	1	13	14	14	15	15	Detection fixed reloc	0.628
2020	1	7	5	43	31.756	38.0134	23.0053	6.71	1.1	2	2020-01-07-05-43-31	2020-01-09-20-40-32	8	1	13	14	14	15	15	Detection fixed reloc	0.697
2020	1	7	5	46	33.636	38.0134	23.0053	6.71	-0.1	2	2020-01-07-05-46-33	2020-01-09-20-40-32	8	1	13	14	14	15	15	Detection fixed reloc	0.721
2020	1	7	6	26	7.936	38.0134	23.0053	6.71	0.4	2	2020-01-07-06-26-07	2020-01-09-20-40-32	8	1	13	14	14	15	15	Detection fixed reloc	0.696
2020	1	7	16	37	55.836	38.0134	23.0053	6.71	-0.1	2	2020-01-07-16-37-55	2020-01-09-20-40-32	8	1	13	14	14	15	15	Detection fixed reloc	0.82
2020	1	7	19	27	48.646	38.0532	22.8755	9.14	0.6	2	2020-01-07-19-27-48	2020-07-20-15-03-27	2	3	2	2	2	16	16	Detection fixed reloc	0.916
2020	1	7	19	36	26.266	38.0532	22.8755	9.14	0	2	2020-01-07-19-36-26	2020-07-20-15-03-27	2	3	2	2	2	16	16	Detection fixed reloc	0.646
2020	1	8	3	42	37.536	38.0134	23.0053	6.71	-0.1	2	2020-01-08-03-42-37	2020-01-09-20-40-32	8	1	13	14	14	15	15	Detection fixed reloc	0.644
2020	1	8	7	26	19.967	38.0786	22.8589	9.08	0.3	2	2020-01-08-07-26-19	2020-02-12-21-32-14	9	3	14	15	16	18	18	Detection fixed reloc	0.724
2020	1	8	7	28	20.887	38.0786	22.8589	9.08	0.6	2	2020-01-08-07-28-20	2020-02-12-21-32-14	9	3	14	15	16	18	18	Detection fixed reloc	0.713
2020	1	8	7	31	28.907	38.0786	22.8589	9.08	1.1	2	2020-01-08-07-31-28	2020-02-12-21-32-14	9	3	14	15	16	18	18	Detection fixed reloc	0.737
2020	1	8	7	35	35.327	38.0786	22.8589	9.08	0.6	2	2020-01-08-07-35-35	2020-02-12-21-32-14	9	3	14	15	16	18	18	Detection fixed reloc	0.747
2020	1	8	10	12	6.316	38.0134	23.0053	6.71	-0.1	2	2020-01-08-10-12-06	2020-01-09-20-40-32	8	1	13	14	14	15	15	Detection fixed reloc	0.705
2020	1	8	12	20	55.876	38.0134	23.0053	6.71	-0.4	2	2020-01-08-12-20-55	2020-01-09-20-40-32	8	1	13	14	14	15	15	Detection fixed reloc	0.823
2020	1	8	17	15	21.134	38.0336	22.9426	7.79	0.4	2	2020-01-08-17-15-21	2020-07-06-19-54-03	2	1	5	5	5	5	5	Detection fixed reloc	0.698
2020	1	8	22	15	43.996	38.0134	23.0053	6.71	0.2	2	2020-01-08-22-15-43	2020-01-09-20-40-32	8	1	13	14	14	15	15	Detection fixed reloc	0.663
2020	1	9	2	26	53.896	38.0134	23.0053	6.71	-0.2	2	2020-01-09-02-26-53	2020-01-09-20-40-32	8	1	13	14	14	15	15	Detection fixed reloc	0.647
2020	1	9	11	38	45.676	38.0134	23.0053	6.71	0.2	2	2020-01-09-11-38-45	2020-01-09-20-40-32	8	1	13	14	14	15	15	Detection fixed reloc	0.608
2020	1	9	12	16	16.76	38.1876	22.7203	11.26	0.5	2	2020-01-09-12-16-16	2020-01-17-15-51-20	1	6	10	10	10	12	12	Detection fixed reloc	0.817
2020	1	9	12	19	58.28	38.1876	22.7203	11.26	0.8	2	2020-01-09-12-19-58	2020-01-17-15-51-20	1	6	10	10	10	12	12	Detection fixed reloc	0.609
2020	1	9	12	24	34.92	38.1876	22.7203	11.26	0.8	2	2020-01-09-12-24-34	2020-01-17-15-51-20	1	6	10	10	10	12	12	Detection fixed reloc	0.862
2020	1	9	12	44	4.02	38.1876	22.7203	11.26	0.7	2	2020-01-09-12-44-04	2020-01-17-15-51-20	1	6	10	10	10	12	12	Detection fixed reloc	0.914
2020	1	9	12	56	37.96	38.1876	22.7203	11.26	0.6	2	2020-01-09-12-56-37	2020-01-17-15-51-20	1	6	10	10	10	12	12	Detection fixed reloc	0.69
2020	1	9	13	55	52.12	38.1876	22.7203	11.26	0.9	2	2020-01-09-13-55-52	2020-01-17-15-51-20	1	6	10	10	10	12	12	Detection fixed reloc	0.744
2020	1	9	15	31	56.936	38.0134	23.0053	6.71	-0.3	2	2020-01-09-15-31-56	2020-01-09-20-40-32	8	1	13	14	14	15	15	Detection fixed reloc	0.738
2020	1	9	20	2	11.056	38.0134	23.0053	6.71	-0.3	2	2020-01-09-20-02-11	2020-01-09-20-40-32	8	1	13	14	14	15	15	Detection fixed reloc	0.762
2020	1	9	20	36	56.676	38.0134	23.0053	6.71	0.3	2	2020-01-09-20-36-56	2020-01-09-20-40-32	8	1	13	14	14	15	15	Detection fixed reloc	0.694
2020	1	9	20	40	32.446	38.0134	23.0053	6.71	1.2	1	2020-01-09-20-40-32	2020-01-09-20-40-32	8	1	13	14	14	15	15	Template reloc	1
2020	1	9	20	41	10.296	38.0134	23.0053	6.71	-0.3	2	2020-01-09-20-41-10	2020-01-09-20-40-32	8	1	13	14	14	15	15	Detection fixed reloc	0.831
2020	1	9	20	43	1.676	38.0134	23.0053	6.71	-0.4	2	2020-01-09-20-43-01	2020-01-09-20-40-32	8	1	13	14	14	15	15	Detection fixed reloc	0.743
2020	1	9	22	8	12.196	38.0134	23.0053	6.71	0	2	2020-01-09-22-08-12	2020-01-09-20-40-32	8	1	13	14	14	15	15	Detection fixed reloc	0.742
2020	1	9	23	31	15.636	38.0134	23.0053	6.71	-0.3	2	2020-01-09-23-31-15	2020-01-09-20-40-32	8	1	13	14	14	15	15	Detection fixed reloc	0.662
2020	1	9	23	48	47.496	38.0134	23.0053	6.71	-0.2	2	2020-01-09-23-48-47	2020-01-09-20-40-32	8	1	13	14	14	15	15	Detection fixed reloc	0.773
2020	1	10	1	34	8.82	38.1876	22.7203	11.26	0.3	2	2020-01-10-01-34-08	2020-01-17-15-51-20	1	6	10	10	10	12	12	Detection fixed reloc	0.84
2020	1	10	1	43	4.336	38.0134	23.0053	6.71	0.4	2	2020-01-10-01-43-04	2020-01-09-20-40-32	8	1	13	14	14	15	15	Detection fixed reloc	0.706
2020	1	10	1	55	5.096	38.0134	23.0053	6.71	-0.1	2	2020-01-10-01-55-05	2020-01-09-20-40-32	8	1	13	14	14	15	15	Detection fixed reloc	0.695
2020	1	10	3	5	24.956	38.0134	23.0053	6.71	-0.4	2	2020-01-10-03-05-24	2020-01-09-20-40-32	8	1	13	14	14	15	15	Detection fixed reloc	0.687
2020	1	10	3	33	50.716	38.0134	23.0053	6.71	0	2	2020-01-10-03-33-50	2020-01-09-20-40-32	8	1	13	14	14	15	15	Detection fixed reloc	0.669
2020	1	10	7	52	7.625	38.1384	22.615	8.57	1.6	1	2020-01-10-07-52-08	2020-01-10-07-52-08	3	9	6	6	6	6	6	Template reloc	1
2020	1	10	8	24	53.395	38.1384	22.615	8.57	1	2	2020-01-10-08-24-53	2020-01-10-07-52-08	3	9	6	6	6	6	6	Detection fixed reloc	0.805
2020	1	10	8	25	22.816	38.0134	23.0053	6.71	0	2	2020-01-10-08-25-22	2020-01-09-20-40-32	8	1	13	14	14	15	15	Detection fixed reloc	0.632
2020	1	10	9	2	28.955	38.1384	22.615	8.57	1.1	2	2020-01-10-09-02-28	2020-01-10-07-52-08	3	9	6	6	6	6	6	Detection fixed reloc	0.873
2020	1	10	9	58	55.536	38.0134	23.0053	6.71	0.5	2	2020-01-10-09-58-55	2020-01-09-20-40-32	8	1	13	14	14	15	15	Detection fixed reloc	0.691
2020	1	10	16	11	4.196	38.0134	23.0053	6.71	-0.1	2	2020-01-10-16-11-04	2020-01-09-20-40-32	8	1	13	14	14	15	15	Detection fixed reloc	0.764
2020	1	10	19	31	41.176	38.0134	23.0053	6.71	0.2	2	2020-01-10-19-31-41	2020-01-09-20-40-32	8	1	13	14	14	15	15	Detection fixed reloc	0.758
2020	1	10	20	47	3.196	38.0134	23.0053	6.71	0.1	2	2020-01-10-20-47-03	2020-01-09-20-40-32	8	1	13	14	14	15	15	Detection fixed reloc	0.744
2020	1	10	23	17	39.336	38.0134	23.0053	6.71	0.2	2	2020-01-10-23-17-39	2020-01-09-20-40-32	8	1	13	14	14	15	15	Detection fixed reloc	0.821
2020	1	10	23	27	21.989	38.0704	22.9217	7.47	0.1	2	2020-01-10-23-27-21	2020-02-24-01-40-56	10	2	15	16	17	19	19	Detection fixed reloc	0.693
2020	1	10	23	49	37.296	38.0134	23.0053	6.71	-0.5	2	2020-01-10-23-49-37	2020-01-09-20-40-32	8	1	13	14	14	15	15	Detection fixed reloc	0.716
2020	1	11	0	2	29.105	38.0283	22.8916	11.06	-0.5	2	2020-01-11-00-02-29	2020-07-21-15-45-04	11	3	16	17	18	20	20	Detection fixed reloc	0.64
2020	1	11	0	11	39.192	38.2011	22.7355	7.1	1	2	2020-01-11-00-11-39	2020-01-17-19-10-15	1	6	7	7	15	17	17	Detection fixed reloc	0.685
2020	1	11	2	45	13.536	38.0134	23.0053	6.71	0.1	2	2020-01-11-02-45-13	2020-01-09-20-40-32	8	1	13	14	14	15	15	Detection fixed reloc	0.744
2020	1	11	11	34	7.016	38.0134	23.0053	6.71	0.7	2	2020-01-11-11-34-07	2020-01-09-20-40-32	8	1	13	14	14	15	15	Detection fixed reloc	0.684
2020	1	11	14	12	13.962	38.0967	22.8974	6.62	0.7	2	2020-01-11-14-12-13	2020-05-24-21-33-07	12	2	17	18	19	21	21	Detection fixed reloc	0.617
2020	1	11	20	25	12.442	38.0645	22.8566	7.02	1.5	1	2020-01-11-20-25-13	2020-01-11-20-25-13	13	2	18	19	20	22	22	Template reloc	1
2020	1	11	20	54	22.585	38.0621	22.8736	8.66	0.1	2	2020-01-11-20-54-22	2020-03-09-07-53-04	10	3	15	16	17	19	23	Detection fixed reloc	0.624
2020	1	12	5	50	35.542	38.0444	22.9008	12.66	-0.2	2	2020-01-12-05-50-35	2020-07-21-02-59-28	2	3	2	2	2	2	2	Detection fixed reloc	0.722
2020	1	12	7	48	21.914	38.1589	22.6878	13.64	0.9	2	2020-01-12-07-48-21	2020-06-06-21-39-37	14	8	19	20	21	23	24	Detection fixed reloc	0.64
2020	1	13	17	11	8.108	38.1882	22.716	6.17	1.2	2	2020-01-13-17-11-08	2020-01-26-00-02-03	1	6	20	21	22	24	25	Detection fixed reloc	0.606
2020	1	14	5	11	24.405	38.0621	22.8736	8.66	0	2	2020-01-14-05-11-24	2020-03-09-07-53-04	10	3	15	16	17	19	23	Detection fixed reloc	0.623
2020	1	14	6	30	45.68	38.0672	22.8553	10.29	0.8	2	2020-01-14-06-30-45	2020-02-12-22-11-14	9	3	14	15	16	25	26	Detection fixed reloc	0.606
2020	1	14	11	32	26.753	38.0496	22.8913	12.41	0.1	2	2020-01-14-11-32-26	2020-07-20-00-21-07	2	3	2	2	2	26	27	Detection fixed reloc	0.61
2020	1	14	11	35	29.881	38.0413	22.9271	5.83	0.5	2	2020-01-14-11-35-29	2020-05-19-07-37-09	15	1	21	22	23	27	28	Detection fixed reloc	0.6
2020	1	14	17	55	6.875	38.0614	22.8774	9.01	0.5	2	2020-01-14-17-55-06	2020-07-23-17-43-36	2	3	22	23	24	28	29	Detection fixed reloc	0.649
2020	1	14	20	24	18.654	38.1589	22.6878	13.64	0.7	2	2020-01-14-20-24-18	2020-06-06-21-39-37	14	8	19	20	21	23	24	Detection fixed reloc	0.622
2020	1	17	0	34	1.968	38.1882	22.716	6.17	0.8	2	2020-01-17-00-34-01	2020-01-26-00-02-03	1	6	20	21	22	24	25	Detection fixed reloc	0.646
2020	1	17	0	58	19.271	38.1782	22.7135	6.23	1.1	2	2020-01-17-00-58-19	2020-01-18-00-45-42	1	6	1	1	1	1	1	Detection fixed reloc	0.832
2020	1	17	1	55	13.461	38.1816	22.7122	8.2	0.9	2	2020-01-17-01-55-13	2020-01-26-00-16-27	1	6	1	1	1	1	30	Detection fixed reloc	0.645
2020	1	17	3	7	14.937	38.1064	22.7453	30.81	1.1	2	2020-01-17-03-07-14	2020-01-25-23-14-33	1	8	3	3	3	3	3	Detection fixed reloc	0.751
2020	1	17	3	18	18.691	38.1782	22.7135	6.23	0.8	2	2020-01-17-03-18-18	2020-01-18-00-45-42	1	6	1	1	1	1	1	Detection fixed reloc	0.842
2020	1	17	3	37	13.388	38.1689	22.7221	16.91	0.8	2	2020-01-17-03-37-13	2020-01-25-23-37-39	1	6	3	3	3	3	31	Detection fixed reloc	0.662
2020	1	17	3	45	25.53	38.1797	22.7088	9.37	1.2	2	2020-01-17-03-45-25	2020-01-17-05-30-33	1	6	20	21	22	24	32	Detection fixed reloc	0.741
2020	1	17	5	30	33.54	38.1797	22.7088	9.37	1.9	1	2020-01-17-05-30-33	2020-01-17-05-30-33	1	6	20	21	22	24	32	Template reloc	1
2020	1	17	5	31	14.73	38.1797	22.7088	9.37	1.6	2	2020-01-17-05-31-14	2020-01-17-05-30-33	1	6	20	21	22	24	32	Detection fixed reloc	0.903
2020	1	17	6	14	16.997	38.1064	22.7453	30.81	0.6	2	2020-01-17-06-14-16	2020-01-25-23-14-33	1	8	3	3	3	3	3	Detection fixed reloc	0.625
2020	1	17	7	0	1.568	38.1882	22.716	6.17	0.5	2	2020-01-17-07-00-01	2020-01-26-00-02-03	1	6	20	21	22	24	25	Detection fixed reloc	0.731
2020	1	17	8	40	50.28	38.1876	22.7203	11.26	0.8	2	2020-01-17-08-40-50	2020-01-17-15-51-20	1	6	10	10	10	12	12	Detection fixed reloc	0.692
2020	1	17	11	22	12.308	38.1689	22.7221	16.91	1	2	2020-01-17-11-22-12	2020-01-25-23-37-39	1	6	3	3	3	3	31	Detection fixed reloc	0.616
2020	1	17	13	31	49.431	38.1782	22.7135	6.23	0.6	2	2020-01-17-13-31-49	2020-01-18-00-45-42	1	6	1	1	1	1	1	Detection fixed reloc	0.745
2020	1	17	14	16	34.201	38.1826	22.7122	5.07	2	1	2020-01-17-14-16-34	2020-01-17-14-16-34	1	6	23	24	25	29	33	Template reloc	1
2020	1	17	14	19	16.691	38.1782	22.7135	6.23	0.7	2	2020-01-17-14-19-16	2020-01-18-00-45-42	1	6	1	1	1	1	1	Detection fixed reloc	0.852
2020	1	17	14	23	41.88	38.1876	22.7203	11.26	1.2	2	2020-01-17-14-23-41	2020-01-17-15-51-20	1	6	10	10	10	12	12	Detection fixed reloc	0.807
2020	1	17	14	28	24.66	38.1876	22.7203	11.26	0.6	2	2020-01-17-14-28-24	2020-01-17-15-51-20	1	6	10	10	10	12	12	Detection fixed reloc	0.697
2020	1	17	14	34	55.42	38.1876	22.7203	11.26	0.7	2	2020-01-17-14-34-55	2020-01-17-15-51-20	1	6	10	10	10	12	12	Detection fixed reloc	0.765
2020	1	17	15	48	43.12	38.1876	22.7203	11.26	1.2	2	2020-01-17-15-48-43	2020-01-17-15-51-20	1	6	10	10	10	12	12	Detection fixed reloc	0.933
2020	1	17	15	51	19.65	38.1876	22.7203	11.26	2	1	2020-01-17-15-51-20	2020-01-17-15-51-20	1	6	10	10	10	12	12	Template reloc	1
2020	1	17	15	53	5.12	38.1876	22.7203	11.26	0.9	2	2020-01-17-15-53-05	2020-01-17-15-51-20	1	6	10	10	10	12	12	Detection fixed reloc	0.75
2020	1	17	15	53	33.24	38.1876	22.7203	11.26	0.8	2	2020-01-17-15-53-33	2020-01-17-15-51-20	1	6	10	10	10	12	12	Detection fixed reloc	0.652
2020	1	17	15	59	29.94	38.1876	22.7203	11.26	0.7	2	2020-01-17-15-59-29	2020-01-17-15-51-20	1	6	10	10	10	12	12	Detection fixed reloc	0.814
2020	1	17	16	11	46.952	38.2011	22.7355	7.1	1.1	2	2020-01-17-16-11-46	2020-01-17-19-10-15	1	6	7	7	15	17	17	Detection fixed reloc	0.677
2020	1	17	16	15	8.78	38.1876	22.7203	11.26	1.3	2	2020-01-17-16-15-08	2020-01-17-15-51-20	1	6	10	10	10	12	12	Detection fixed reloc	0.603
2020	1	17	16	24	55.9	38.1876	22.7203	11.26	1.1	2	2020-01-17-16-24-55	2020-01-17-15-51-20	1	6	10	10	10	12	12	Detection fixed reloc	0.691
2020	1	17	16	30	7.712	38.2011	22.7355	7.1	1.4	2	2020-01-17-16-30-07	2020-01-17-19-10-15	1	6	7	7	15	17	17	Detection fixed reloc	0.768
2020	1	17	16	30	37.052	38.2011	22.7355	7.1	1	2	2020-01-17-16-30-37	2020-01-17-19-10-15	1	6	7	7	15	17	17	Detection fixed reloc	0.691
2020	1	17	16	40	27.84	38.1876	22.7203	11.26	0.9	2	2020-01-17-16-40-27	2020-01-17-15-51-20	1	6	10	10	10	12	12	Detection fixed reloc	0.644
2020	1	17	16	47	32.991	38.1782	22.7135	6.23	0.8	2	2020-01-17-16-47-32	2020-01-18-00-45-42	1	6	1	1	1	1	1	Detection fixed reloc	0.721
2020	1	17	17	18	19.691	38.1782	22.7135	6.23	0.9	2	2020-01-17-17-18-19	2020-01-18-00-45-42	1	6	1	1	1	1	1	Detection fixed reloc	0.923
2020	1	17	17	43	52.892	38.2011	22.7355	7.1	0.9	2	2020-01-17-17-43-52	2020-01-17-19-10-15	1	6	7	7	15	17	17	Detection fixed reloc	0.73
2020	1	17	17	59	24.632	38.2011	22.7355	7.1	1.1	2	2020-01-17-17-59-24	2020-01-17-19-10-15	1	6	7	7	15	17	17	Detection fixed reloc	0.868
2020	1	17	18	17	14.051	38.1782	22.7135	6.23	1	2	2020-01-17-18-17-14	2020-01-18-00-45-42	1	6	1	1	1	1	1	Detection fixed reloc	0.735
2020	1	17	18	33	36.371	38.1782	22.7135	6.23	0.9	2	2020-01-17-18-33-36	2020-01-18-00-45-42	1	6	1	1	1	1	1	Detection fixed reloc	0.619
2020	1	17	18	55	40.888	38.1882	22.716	6.17	0.6	2	2020-01-17-18-55-40	2020-01-26-00-02-03	1	6	20	21	22	24	25	Detection fixed reloc	0.862
2020	1	17	19	8	47.728	38.1882	22.716	6.17	0.4	2	2020-01-17-19-08-47	2020-01-26-00-02-03	1	6	20	21	22	24	25	Detection fixed reloc	0.75
2020	1	17	19	10	15.002	38.2011	22.7355	7.1	1.7	1	2020-01-17-19-10-15	2020-01-17-19-10-15	1	6	7	7	15	17	17	Template reloc	1
2020	1	17	20	16	15.748	38.1882	22.716	6.17	0.7	2	2020-01-17-20-16-15	2020-01-26-00-02-03	1	6	20	21	22	24	25	Detection fixed reloc	0.893
2020	1	17	20	52	6.632	38.2011	22.7355	7.1	0.8	2	2020-01-17-20-52-06	2020-01-17-19-10-15	1	6	7	7	15	17	17	Detection fixed reloc	0.854
2020	1	17	22	22	29.46	38.1876	22.7203	11.26	0.9	2	2020-01-17-22-22-29	2020-01-17-15-51-20	1	6	10	10	10	12	12	Detection fixed reloc	0.65
2020	1	18	0	45	43.521	38.1782	22.7135	6.23	1.7	1	2020-01-18-00-45-42	2020-01-18-00-45-42	1	6	1	1	1	1	1	Template reloc	1
2020	1	18	1	4	34.656	38.1759	22.7264	17.05	0.4	2	2020-01-18-01-04-34	2020-01-31-03-34-57	1	6	7	25	26	30	34	Detection fixed reloc	0.603
2020	1	18	1	37	24.747	38.1858	22.7529	15.98	1.5	1	2020-01-18-01-37-23	2020-01-18-01-37-23	1	6	1	1	27	31	35	Template reloc	1
2020	1	18	3	7	12.668	38.1689	22.7221	16.91	0.8	2	2020-01-18-03-07-12	2020-01-25-23-37-39	1	6	3	3	3	3	31	Detection fixed reloc	0.693
2020	1	18	3	15	21.691	38.1782	22.7135	6.23	0.6	2	2020-01-18-03-15-21	2020-01-18-00-45-42	1	6	1	1	1	1	1	Detection fixed reloc	0.898
2020	1	18	3	38	35.24	38.1876	22.7203	11.26	0.6	2	2020-01-18-03-38-35	2020-01-17-15-51-20	1	6	10	10	10	12	12	Detection fixed reloc	0.876
2020	1	18	4	41	0.288002	38.1882	22.716	6.17	0.6	2	2020-01-18-04-41-00	2020-01-26-00-02-03	1	6	20	21	22	24	25	Detection fixed reloc	0.804
2020	1	18	5	13	9.071	38.1782	22.7135	6.23	1.2	2	2020-01-18-05-13-09	2020-01-18-00-45-42	1	6	1	1	1	1	1	Detection fixed reloc	0.826
2020	1	18	5	13	53.6	38.1876	22.7203	11.26	0.8	2	2020-01-18-05-13-53	2020-01-17-15-51-20	1	6	10	10	10	12	12	Detection fixed reloc	0.831
2020	1	18	7	0	35.811	38.1869	22.7195	12.36	0.9	2	2020-01-18-07-00-35	2020-01-24-09-06-05	1	6	10	10	10	10	10	Detection fixed reloc	0.606
2020	1	18	7	47	42.46	38.1876	22.7203	11.26	0.8	2	2020-01-18-07-47-42	2020-01-17-15-51-20	1	6	10	10	10	12	12	Detection fixed reloc	0.646
2020	1	18	7	48	50.68	38.1876	22.7203	11.26	1.1	2	2020-01-18-07-48-50	2020-01-17-15-51-20	1	6	10	10	10	12	12	Detection fixed reloc	0.807
2020	1	18	8	10	39.791	38.1782	22.7135	6.23	0.8	2	2020-01-18-08-10-39	2020-01-18-00-45-42	1	6	1	1	1	1	1	Detection fixed reloc	0.717
2020	1	18	8	54	16.511	38.0421	22.8927	14.64	0.3	2	2020-01-18-08-54-16	2020-07-22-18-54-09	4	3	8	8	8	8	8	Detection fixed reloc	0.64
2020	1	18	9	19	27.249	38.0632	22.9297	7.05	0.1	2	2020-01-18-09-19-27	2020-05-15-15-41-15	2	2	24	26	28	32	36	Detection fixed reloc	0.609
2020	1	18	9	27	36.637	38.1064	22.7453	30.81	0.6	2	2020-01-18-09-27-36	2020-01-25-23-14-33	1	8	3	3	3	3	3	Detection fixed reloc	0.671
2020	1	18	11	5	7.18	38.1876	22.7203	11.26	1.2	2	2020-01-18-11-05-07	2020-01-17-15-51-20	1	6	10	10	10	12	12	Detection fixed reloc	0.625
2020	1	18	11	24	7.32	38.1876	22.7203	11.26	0.8	2	2020-01-18-11-24-07	2020-01-17-15-51-20	1	6	10	10	10	12	12	Detection fixed reloc	0.698
2020	1	18	11	25	18.867	38.1858	22.7529	15.98	1	2	2020-01-18-11-25-18	2020-01-18-01-37-23	1	6	1	1	27	31	35	Detection fixed reloc	0.646
2020	1	18	13	44	58.472	38.2011	22.7355	7.1	1.3	2	2020-01-18-13-44-58	2020-01-17-19-10-15	1	6	7	7	15	17	17	Detection fixed reloc	0.668
2020	1	18	13	53	25.904	38.1719	22.7179	16.04	1.1	2	2020-01-18-13-53-25	2020-01-26-05-05-47	1	6	20	21	22	33	37	Detection fixed reloc	0.61
2020	1	18	17	50	52.511	38.1782	22.7135	6.23	1.1	2	2020-01-18-17-50-52	2020-01-18-00-45-42	1	6	1	1	1	1	1	Detection fixed reloc	0.903
2020	1	18	17	52	16.608	38.1882	22.716	6.17	0.4	2	2020-01-18-17-52-16	2020-01-26-00-02-03	1	6	20	21	22	24	25	Detection fixed reloc	0.756
2020	1	18	21	10	15.947	38.063	22.8587	7.06	-0.1	2	2020-01-18-21-10-15	2020-01-18-21-11-07	16	2	25	27	29	34	38	Detection fixed reloc	0.863
2020	1	18	21	11	6.307	38.063	22.8587	7.06	1.5	1	2020-01-18-21-11-07	2020-01-18-21-11-07	16	2	25	27	29	34	38	Template reloc	1
2020	1	18	21	36	2.631	38.1782	22.7135	6.23	0.5	2	2020-01-18-21-36-02	2020-01-18-00-45-42	1	6	1	1	1	1	1	Detection fixed reloc	0.764
2020	1	18	22	16	14.117	38.0175	22.9372	11.51	0	2	2020-01-18-22-16-14	2020-08-15-01-51-15	17	1	26	28	30	35	39	Detection fixed reloc	0.616
2020	1	19	1	19	10.848	38.1882	22.716	6.17	0.6	2	2020-01-19-01-19-10	2020-01-26-00-02-03	1	6	20	21	22	24	25	Detection fixed reloc	0.645
2020	1	19	1	42	55.754	38.0845	22.8171	46.31	1.2	1	2020-01-19-01-42-58	2020-01-19-01-42-58	1	4	7	7	7	7	40	Template loc	1
2020	1	19	2	23	43.468	38.1882	22.716	6.17	0.5	2	2020-01-19-02-23-43	2020-01-26-00-02-03	1	6	20	21	22	24	25	Detection fixed reloc	0.627
2020	1	19	7	24	20.416	38.0134	23.0053	6.71	0.1	2	2020-01-19-07-24-20	2020-01-09-20-40-32	8	1	13	14	14	15	15	Detection fixed reloc	0.829
2020	1	19	8	31	3.904	38.1719	22.7179	16.04	0.8	2	2020-01-19-08-31-03	2020-01-26-05-05-47	1	6	20	21	22	33	37	Detection fixed reloc	0.673
2020	1	19	14	39	43.44	38.1876	22.7203	11.26	0.6	2	2020-01-19-14-39-43	2020-01-17-15-51-20	1	6	10	10	10	12	12	Detection fixed reloc	0.711
2020	1	19	18	6	46.576	38.0525	22.9061	11.36	0.1	2	2020-01-19-18-06-46	2020-04-28-02-43-29	18	2	27	29	31	36	41	Detection fixed reloc	0.61
2020	1	20	0	46	32.216	38.0525	22.9061	11.36	0.3	2	2020-01-20-00-46-32	2020-04-28-02-43-29	18	2	27	29	31	36	41	Detection fixed reloc	0.608
2020	1	20	3	20	7.784	38.0355	22.9439	5.88	0.6	2	2020-01-20-03-20-07	2020-05-06-17-51-00	15	1	28	30	32	37	42	Detection fixed reloc	0.601
2020	1	20	6	12	51.669	38.1743	22.6421	13	1.9	1	2020-01-20-06-12-52	2020-01-20-06-12-52	19	9	29	31	33	38	43	Template reloc	1
2020	1	20	9	3	18.92	38.1876	22.7203	11.26	1.5	2	2020-01-20-09-03-18	2020-01-17-15-51-20	1	6	10	10	10	12	12	Detection fixed reloc	0.681
2020	1	20	12	27	9.54	38.1876	22.7203	11.26	1	2	2020-01-20-12-27-09	2020-01-17-15-51-20	1	6	10	10	10	12	12	Detection fixed reloc	0.609
2020	1	20	18	29	12.441	38.1816	22.7122	8.2	1	2	2020-01-20-18-29-12	2020-01-26-00-16-27	1	6	1	1	1	1	30	Detection fixed reloc	0.905
2020	1	21	15	55	21.033	38.0496	22.8913	12.41	1	2	2020-01-21-15-55-21	2020-07-20-00-21-07	2	3	2	2	2	26	27	Detection fixed reloc	0.832
2020	1	21	19	26	50.627	38.1858	22.7529	15.98	1	2	2020-01-21-19-26-50	2020-01-18-01-37-23	1	6	1	1	27	31	35	Detection fixed reloc	0.633
2020	1	21	19	41	51.28	38.1876	22.7203	11.26	0.6	2	2020-01-21-19-41-51	2020-01-17-15-51-20	1	6	10	10	10	12	12	Detection fixed reloc	0.823
2020	1	22	0	0	19.137	38.1064	22.7453	30.81	0.6	2	2020-01-22-00-00-19	2020-01-25-23-14-33	1	8	3	3	3	3	3	Detection fixed reloc	0.716
2020	1	22	1	4	27.131	38.1782	22.7135	6.23	0.7	2	2020-01-22-01-04-27	2020-01-18-00-45-42	1	6	1	1	1	1	1	Detection fixed reloc	0.615
2020	1	22	3	10	27.995	38.1732	22.7374	18.07	1.5	2	2020-01-22-03-10-27	2020-01-01-22-36-39	1	6	7	7	7	7	7	Detection fixed reloc	0.734
2020	1	22	3	17	53.769	38.0632	22.9297	7.05	0.3	2	2020-01-22-03-17-53	2020-05-15-15-41-15	2	2	24	26	28	32	36	Detection fixed reloc	0.623
2020	1	22	7	54	10.096	38.0782	22.803	11.93	0.3	2	2020-01-22-07-54-10	2020-11-13-11-45-18	5	4	11	11	34	39	44	Detection fixed reloc	0.623
2020	1	22	11	38	46.922	38.0444	22.9008	12.66	0	2	2020-01-22-11-38-46	2020-07-21-02-59-28	2	3	2	2	2	2	2	Detection fixed reloc	0.823
2020	1	22	13	12	3.462	38.1803	22.7285	13.3	1	2	2020-01-22-13-12-03	2020-01-22-16-33-56	1	6	9	9	9	9	9	Detection fixed reloc	0.919
2020	1	22	13	34	3.842	38.1803	22.7285	13.3	0.4	2	2020-01-22-13-34-03	2020-01-22-16-33-56	1	6	9	9	9	9	9	Detection fixed reloc	0.874
2020	1	22	13	44	46.922	38.1803	22.7285	13.3	0.4	2	2020-01-22-13-44-46	2020-01-22-16-33-56	1	6	9	9	9	9	9	Detection fixed reloc	0.67
2020	1	22	16	33	55.922	38.1803	22.7285	13.3	1.8	1	2020-01-22-16-33-56	2020-01-22-16-33-56	1	6	9	9	9	9	9	Template reloc	1
2020	1	22	16	37	32.115	38.1732	22.7374	18.07	1	2	2020-01-22-16-37-32	2020-01-01-22-36-39	1	6	7	7	7	7	7	Detection fixed reloc	0.659
2020	1	22	17	13	54.462	38.1803	22.7285	13.3	0.7	2	2020-01-22-17-13-54	2020-01-22-16-33-56	1	6	9	9	9	9	9	Detection fixed reloc	0.613
2020	1	22	18	46	2.342	38.0444	22.9008	12.66	-0.1	2	2020-01-22-18-46-02	2020-07-21-02-59-28	2	3	2	2	2	2	2	Detection fixed reloc	0.626
2020	1	23	0	34	42.072	38.2011	22.7355	7.1	1	2	2020-01-23-00-34-42	2020-01-17-19-10-15	1	6	7	7	15	17	17	Detection fixed reloc	0.647
2020	1	23	20	11	42.576	38.0134	23.0053	6.71	0.3	2	2020-01-23-20-11-42	2020-01-09-20-40-32	8	1	13	14	14	15	15	Detection fixed reloc	0.676
2020	1	23	21	56	46.32	38.1876	22.7203	11.26	0.9	2	2020-01-23-21-56-46	2020-01-17-15-51-20	1	6	10	10	10	12	12	Detection fixed reloc	0.621
2020	1	23	22	32	14.037	38.1064	22.7453	30.81	0.4	2	2020-01-23-22-32-14	2020-01-25-23-14-33	1	8	3	3	3	3	3	Detection fixed reloc	0.634
2020	1	23	23	14	13.071	38.1869	22.7195	12.36	1	2	2020-01-23-23-14-13	2020-01-24-09-06-05	1	6	10	10	10	10	10	Detection fixed reloc	0.684
2020	1	23	23	28	45.6	38.1876	22.7203	11.26	1.1	2	2020-01-23-23-28-45	2020-01-17-15-51-20	1	6	10	10	10	12	12	Detection fixed reloc	0.622
2020	1	24	3	41	4.096	38.0134	23.0053	6.71	-0.1	2	2020-01-24-03-41-04	2020-01-09-20-40-32	8	1	13	14	14	15	15	Detection fixed reloc	0.627
2020	1	24	8	29	49.211	38.1869	22.7195	12.36	0.6	2	2020-01-24-08-29-49	2020-01-24-09-06-05	1	6	10	10	10	10	10	Detection fixed reloc	0.724
2020	1	24	9	6	7.271	38.1869	22.7195	12.36	1.7	1	2020-01-24-09-06-05	2020-01-24-09-06-05	1	6	10	10	10	10	10	Template reloc	1
2020	1	24	10	57	5.451	38.1869	22.7195	12.36	1.3	2	2020-01-24-10-57-05	2020-01-24-09-06-05	1	6	10	10	10	10	10	Detection fixed reloc	0.865
2020	1	24	14	24	9.761	38.1816	22.7122	8.2	0.4	2	2020-01-24-14-24-09	2020-01-26-00-16-27	1	6	1	1	1	1	30	Detection fixed reloc	0.676
2020	1	24	18	46	16.278	38.2007	22.7449	5.79	1.5	1	2020-01-24-18-46-14	2020-01-24-18-46-14	20	6	30	32	35	40	45	Template reloc	1
2020	1	24	20	26	41.071	38.1869	22.7195	12.36	0.7	2	2020-01-24-20-26-41	2020-01-24-09-06-05	1	6	10	10	10	10	10	Detection fixed reloc	0.776
2020	1	24	20	58	39.471	38.1869	22.7195	12.36	0.4	2	2020-01-24-20-58-39	2020-01-24-09-06-05	1	6	10	10	10	10	10	Detection fixed reloc	0.741
2020	1	25	2	55	12.468	38.1882	22.716	6.17	0.4	2	2020-01-25-02-55-12	2020-01-26-00-02-03	1	6	20	21	22	24	25	Detection fixed reloc	0.611
2020	1	25	7	26	22.64	38.042	22.8713	8.47	0.3	2	2020-01-25-07-26-22	2020-08-06-21-33-02	2	3	22	33	36	41	46	Detection fixed reloc	0.622
2020	1	25	17	18	49.105	38.2609	22.7628	6.49	1.7	1	2020-01-25-17-18-49	2020-01-25-17-18-49	21	7	31	34	37	42	47	Template reloc	1
2020	1	25	18	45	22.817	38.0175	22.9372	11.51	0	2	2020-01-25-18-45-22	2020-08-15-01-51-15	17	1	26	28	30	35	39	Detection fixed reloc	0.642
2020	1	25	19	44	28.72	38.042	22.8713	8.47	0.3	2	2020-01-25-19-44-28	2020-08-06-21-33-02	2	3	22	33	36	41	46	Detection fixed reloc	0.606
2020	1	25	21	13	31.631	38.0567	22.8827	13.13	-0.1	2	2020-01-25-21-13-31	2020-07-22-19-28-57	4	3	8	8	8	8	8	Detection fixed reloc	0.678
2020	1	25	22	29	59.697	38.1064	22.7453	30.81	0.3	2	2020-01-25-22-29-59	2020-01-25-23-14-33	1	8	3	3	3	3	3	Detection fixed reloc	0.846
2020	1	25	23	14	32.947	38.1064	22.7453	30.81	1.1	1	2020-01-25-23-14-33	2020-01-25-23-14-33	1	8	3	3	3	3	3	Template reloc	1
2020	1	25	23	37	38.088	38.1689	22.7221	16.91	2.2	1	2020-01-25-23-37-39	2020-01-25-23-37-39	1	6	3	3	3	3	31	Template reloc	1
2020	1	25	23	39	53.297	38.1064	22.7453	30.81	0.1	2	2020-01-25-23-39-53	2020-01-25-23-14-33	1	8	3	3	3	3	3	Detection fixed reloc	0.695
2020	1	25	23	42	43.357	38.1064	22.7453	30.81	0.2	2	2020-01-25-23-42-43	2020-01-25-23-14-33	1	8	3	3	3	3	3	Detection fixed reloc	0.756
2020	1	25	23	46	37.127	38.1858	22.7529	15.98	1.2	2	2020-01-25-23-46-37	2020-01-18-01-37-23	1	6	1	1	27	31	35	Detection fixed reloc	0.842
2020	1	25	23	47	18.347	38.1858	22.7529	15.98	0.8	2	2020-01-25-23-47-18	2020-01-18-01-37-23	1	6	1	1	27	31	35	Detection fixed reloc	0.686
2020	1	25	23	49	32.847	38.1858	22.7529	15.98	0.9	2	2020-01-25-23-49-32	2020-01-18-01-37-23	1	6	1	1	27	31	35	Detection fixed reloc	0.625
2020	1	26	0	1	17.167	38.1858	22.7529	15.98	1.1	2	2020-01-26-00-01-17	2020-01-18-01-37-23	1	6	1	1	27	31	35	Detection fixed reloc	0.721
2020	1	26	0	2	3.768	38.1882	22.716	6.17	1.7	1	2020-01-26-00-02-03	2020-01-26-00-02-03	1	6	20	21	22	24	25	Template reloc	1
2020	1	26	0	4	40.751	38.1782	22.7135	6.23	0.5	2	2020-01-26-00-04-40	2020-01-18-00-45-42	1	6	1	1	1	1	1	Detection fixed reloc	0.688
2020	1	26	0	6	7.67	38.1797	22.7088	9.37	1.2	2	2020-01-26-00-06-07	2020-01-17-05-30-33	1	6	20	21	22	24	32	Detection fixed reloc	0.815
2020	1	26	0	16	2.941	38.1816	22.7122	8.2	0.5	2	2020-01-26-00-16-02	2020-01-26-00-16-27	1	6	1	1	1	1	30	Detection fixed reloc	0.623
2020	1	26	0	16	27.591	38.1816	22.7122	8.2	1.4	1	2020-01-26-00-16-27	2020-01-26-00-16-27	1	6	1	1	1	1	30	Template reloc	1
2020	1	26	0	46	15.207	38.1858	22.7529	15.98	1.1	2	2020-01-26-00-46-15	2020-01-18-01-37-23	1	6	1	1	27	31	35	Detection fixed reloc	0.705
2020	1	26	0	48	10.517	38.1064	22.7453	30.81	0.9	2	2020-01-26-00-48-10	2020-01-25-23-14-33	1	8	3	3	3	3	3	Detection fixed reloc	0.789
2020	1	26	0	51	14.961	38.1816	22.7122	8.2	0.4	2	2020-01-26-00-51-14	2020-01-26-00-16-27	1	6	1	1	1	1	30	Detection fixed reloc	0.697
2020	1	26	0	53	4.807	38.1858	22.7529	15.98	1.2	2	2020-01-26-00-53-04	2020-01-18-01-37-23	1	6	1	1	27	31	35	Detection fixed reloc	0.659
2020	1	26	0	54	38.784	38.1719	22.7179	16.04	0.9	2	2020-01-26-00-54-38	2020-01-26-05-05-47	1	6	20	21	22	33	37	Detection fixed reloc	0.659
2020	1	26	1	4	26.484	38.1719	22.7179	16.04	0.8	2	2020-01-26-01-04-26	2020-01-26-05-05-47	1	6	20	21	22	33	37	Detection fixed reloc	0.603
2020	1	26	1	11	30.947	38.1858	22.7529	15.98	1.5	2	2020-01-26-01-11-30	2020-01-18-01-37-23	1	6	1	1	27	31	35	Detection fixed reloc	0.817
2020	1	26	1	19	28.527	38.1858	22.7529	15.98	0.9	2	2020-01-26-01-19-28	2020-01-18-01-37-23	1	6	1	1	27	31	35	Detection fixed reloc	0.68
2020	1	26	1	37	8.411	38.1782	22.7135	6.23	0.9	2	2020-01-26-01-37-08	2020-01-18-00-45-42	1	6	1	1	1	1	1	Detection fixed reloc	0.83
2020	1	26	1	37	32.487	38.1858	22.7529	15.98	1.2	2	2020-01-26-01-37-32	2020-01-18-01-37-23	1	6	1	1	27	31	35	Detection fixed reloc	0.81
2020	1	26	1	44	14.347	38.1858	22.7529	15.98	1.6	2	2020-01-26-01-44-14	2020-01-18-01-37-23	1	6	1	1	27	31	35	Detection fixed reloc	0.858
2020	1	26	1	47	38.688	38.1689	22.7221	16.91	0.8	2	2020-01-26-01-47-38	2020-01-25-23-37-39	1	6	3	3	3	3	31	Detection fixed reloc	0.83
2020	1	26	1	51	35.287	38.1858	22.7529	15.98	1.1	2	2020-01-26-01-51-35	2020-01-18-01-37-23	1	6	1	1	27	31	35	Detection fixed reloc	0.754
2020	1	26	2	19	28.424	38.1719	22.7179	16.04	1.2	2	2020-01-26-02-19-28	2020-01-26-05-05-47	1	6	20	21	22	33	37	Detection fixed reloc	0.928
2020	1	26	2	20	59.744	38.1719	22.7179	16.04	0.5	2	2020-01-26-02-20-59	2020-01-26-05-05-47	1	6	20	21	22	33	37	Detection fixed reloc	0.741
2020	1	26	3	26	20.488	38.1882	22.716	6.17	0.5	2	2020-01-26-03-26-20	2020-01-26-00-02-03	1	6	20	21	22	24	25	Detection fixed reloc	0.722
2020	1	26	4	1	21.277	38.1064	22.7453	30.81	0.2	2	2020-01-26-04-01-21	2020-01-25-23-14-33	1	8	3	3	3	3	3	Detection fixed reloc	0.637
2020	1	26	4	33	46.984	38.1719	22.7179	16.04	1.2	2	2020-01-26-04-33-46	2020-01-26-05-05-47	1	6	20	21	22	33	37	Detection fixed reloc	0.956
2020	1	26	5	5	47.644	38.1719	22.7179	16.04	1.7	1	2020-01-26-05-05-47	2020-01-26-05-05-47	1	6	20	21	22	33	37	Template reloc	1
2020	1	26	5	19	44.564	38.1719	22.7179	16.04	0.9	2	2020-01-26-05-19-44	2020-01-26-05-05-47	1	6	20	21	22	33	37	Detection fixed reloc	0.656
2020	1	26	5	46	20.977	38.1064	22.7453	30.81	0.7	2	2020-01-26-05-46-20	2020-01-25-23-14-33	1	8	3	3	3	3	3	Detection fixed reloc	0.679
2020	1	26	5	47	28.057	38.1064	22.7453	30.81	0.7	2	2020-01-26-05-47-28	2020-01-25-23-14-33	1	8	3	3	3	3	3	Detection fixed reloc	0.72
2020	1	26	7	0	38.184	38.1719	22.7179	16.04	1.1	2	2020-01-26-07-00-38	2020-01-26-05-05-47	1	6	20	21	22	33	37	Detection fixed reloc	0.682
2020	1	26	7	50	31.784	38.1719	22.7179	16.04	0.8	2	2020-01-26-07-50-31	2020-01-26-05-05-47	1	6	20	21	22	33	37	Detection fixed reloc	0.668
2020	1	26	10	52	11.364	38.1719	22.7179	16.04	0.7	2	2020-01-26-10-52-11	2020-01-26-05-05-47	1	6	20	21	22	33	37	Detection fixed reloc	0.738
2020	1	26	11	35	34.047	38.1858	22.7529	15.98	1.1	2	2020-01-26-11-35-34	2020-01-18-01-37-23	1	6	1	1	27	31	35	Detection fixed reloc	0.633
2020	1	26	12	0	10.388	38.1689	22.7221	16.91	0.7	2	2020-01-26-12-00-10	2020-01-25-23-37-39	1	6	3	3	3	3	31	Detection fixed reloc	0.677
2020	1	26	12	59	24.84	38.1876	22.7203	11.26	0.4	2	2020-01-26-12-59-24	2020-01-17-15-51-20	1	6	10	10	10	12	12	Detection fixed reloc	0.747
2020	1	26	15	8	27.1	38.042	22.8713	8.47	0.2	2	2020-01-26-15-08-27	2020-08-06-21-33-02	2	3	22	33	36	41	46	Detection fixed reloc	0.759
2020	1	26	21	50	5.42	38.042	22.8713	8.47	0.2	2	2020-01-26-21-50-05	2020-08-06-21-33-02	2	3	22	33	36	41	46	Detection fixed reloc	0.686
2020	1	27	0	35	44.252	38.2011	22.7355	7.1	0.6	2	2020-01-27-00-35-44	2020-01-17-19-10-15	1	6	7	7	15	17	17	Detection fixed reloc	0.666
2020	1	27	2	30	49.48	38.042	22.8713	8.47	0.6	2	2020-01-27-02-30-49	2020-08-06-21-33-02	2	3	22	33	36	41	46	Detection fixed reloc	0.781
2020	1	27	6	18	28.152	38.2011	22.7355	7.1	1	2	2020-01-27-06-18-28	2020-01-17-19-10-15	1	6	7	7	15	17	17	Detection fixed reloc	0.89
2020	1	27	6	23	2.232	38.2011	22.7355	7.1	0.7	2	2020-01-27-06-23-02	2020-01-17-19-10-15	1	6	7	7	15	17	17	Detection fixed reloc	0.864
2020	1	27	7	0	12.032	38.2011	22.7355	7.1	1	2	2020-01-27-07-00-12	2020-01-17-19-10-15	1	6	7	7	15	17	17	Detection fixed reloc	0.894
2020	1	27	13	45	5.745	38.2609	22.7628	6.49	0.7	2	2020-01-27-13-45-05	2020-01-25-17-18-49	21	7	31	34	37	42	47	Detection fixed reloc	0.887
2020	1	27	13	58	17.904	38.1719	22.7179	16.04	0.9	2	2020-01-27-13-58-17	2020-01-26-05-05-47	1	6	20	21	22	33	37	Detection fixed reloc	0.717
2020	1	27	17	42	8.53	38.1797	22.7088	9.37	0.9	2	2020-01-27-17-42-08	2020-01-17-05-30-33	1	6	20	21	22	24	32	Detection fixed reloc	0.638
2020	1	27	18	28	48.991	38.2629	22.7272	5.74	1.3	2	2020-01-27-18-28-48	2020-02-21-05-44-36	22	7	32	35	38	43	48	Detection fixed reloc	0.648
2020	1	28	8	40	6.697	38.09	22.7769	13.98	1.2	2	2020-01-28-08-40-06	2020-09-07-06-26-49	23	4	33	36	39	44	49	Detection fixed reloc	0.63
2020	1	28	10	41	16.704	38.0845	22.8171	46.31	0.8	2	2020-01-28-10-41-16	2020-01-19-01-42-58	1	4	7	7	7	7	40	Detection fixed loc	0.62
2020	1	29	7	57	1.505	38.2609	22.7628	6.49	0.7	2	2020-01-29-07-57-01	2020-01-25-17-18-49	21	7	31	34	37	42	47	Detection fixed reloc	0.776
2020	1	29	8	35	23.031	38.1782	22.7135	6.23	0.7	2	2020-01-29-08-35-23	2020-01-18-00-45-42	1	6	1	1	1	1	1	Detection fixed reloc	0.703
2020	1	29	10	15	6.4	38.042	22.8713	8.47	0.4	2	2020-01-29-10-15-06	2020-08-06-21-33-02	2	3	22	33	36	41	46	Detection fixed reloc	0.748
2020	1	29	12	14	21.79	38.1797	22.7088	9.37	1.1	2	2020-01-29-12-14-21	2020-01-17-05-30-33	1	6	20	21	22	24	32	Detection fixed reloc	0.682
2020	1	29	14	56	7.46	38.042	22.8713	8.47	0.7	2	2020-01-29-14-56-07	2020-08-06-21-33-02	2	3	22	33	36	41	46	Detection fixed reloc	0.707
2020	1	29	16	43	57.56	38.042	22.8713	8.47	1.2	2	2020-01-29-16-43-57	2020-08-06-21-33-02	2	3	22	33	36	41	46	Detection fixed reloc	0.944
2020	1	29	17	39	2.192	38.2011	22.7355	7.1	1.2	2	2020-01-29-17-39-02	2020-01-17-19-10-15	1	6	7	7	15	17	17	Detection fixed reloc	0.638
2020	1	29	18	52	1.6	38.042	22.8713	8.47	0.7	2	2020-01-29-18-52-01	2020-08-06-21-33-02	2	3	22	33	36	41	46	Detection fixed reloc	0.604
2020	1	29	19	30	28.756	38.0525	22.9061	11.36	0.2	2	2020-01-29-19-30-28	2020-04-28-02-43-29	18	2	27	29	31	36	41	Detection fixed reloc	0.623
2020	1	29	22	24	50.668	38.0622	22.9382	7.68	0.4	2	2020-01-29-22-24-50	2020-05-18-06-05-04	2	2	34	37	40	45	50	Detection fixed reloc	0.611
2020	1	30	7	42	36.2	38.1796	22.7382	15.77	2.8	1	2020-01-30-07-42-37	2020-01-30-07-42-37	20	6	30	32	41	46	51	Template reloc	1
2020	1	30	8	7	11.218	38.2007	22.7449	5.79	1.3	2	2020-01-30-08-07-11	2020-01-24-18-46-14	20	6	30	32	35	40	45	Detection fixed reloc	0.88
2020	1	30	9	40	57.077	38.0214	22.945	8.64	0.7	2	2020-01-30-09-40-57	2020-05-13-14-33-11	2	1	35	38	42	47	52	Detection fixed reloc	0.701
2020	1	30	16	0	40.577	38.0214	22.945	8.64	0.1	2	2020-01-30-16-00-40	2020-05-13-14-33-11	2	1	35	38	42	47	52	Detection fixed reloc	0.757
2020	1	30	16	48	28.477	38.0214	22.945	8.64	-0.1	2	2020-01-30-16-48-28	2020-05-13-14-33-11	2	1	35	38	42	47	52	Detection fixed reloc	0.702
2020	1	30	18	5	27	38.042	22.8713	8.47	0.7	2	2020-01-30-18-05-27	2020-08-06-21-33-02	2	3	22	33	36	41	46	Detection fixed reloc	0.797
2020	1	30	18	45	45.408	38.0622	22.9382	7.68	0.4	2	2020-01-30-18-45-45	2020-05-18-06-05-04	2	2	34	37	40	45	50	Detection fixed reloc	0.808
2020	1	30	18	53	27.088	38.0622	22.9382	7.68	0.3	2	2020-01-30-18-53-27	2020-05-18-06-05-04	2	2	34	37	40	45	50	Detection fixed reloc	0.637
2020	1	30	20	56	15.6	38.042	22.8713	8.47	0.7	2	2020-01-30-20-56-15	2020-08-06-21-33-02	2	3	22	33	36	41	46	Detection fixed reloc	0.789
2020	1	31	2	8	48.22	38.1746	22.7206	8.95	0.5	2	2020-01-31-02-08-48	2020-03-16-21-21-17	24	6	36	39	43	48	53	Detection fixed reloc	0.759
2020	1	31	3	0	37.897	38.0214	22.945	8.64	-0.1	2	2020-01-31-03-00-37	2020-05-13-14-33-11	2	1	35	38	42	47	52	Detection fixed reloc	0.78
2020	1	31	3	14	10.737	38.0214	22.945	8.64	-0.3	2	2020-01-31-03-14-10	2020-05-13-14-33-11	2	1	35	38	42	47	52	Detection fixed reloc	0.727
2020	1	31	3	34	58.776	38.1759	22.7264	17.05	1.6	1	2020-01-31-03-34-57	2020-01-31-03-34-57	1	6	7	25	26	30	34	Template reloc	1
2020	1	31	3	36	57.476	38.1759	22.7264	17.05	0.4	2	2020-01-31-03-36-57	2020-01-31-03-34-57	1	6	7	25	26	30	34	Detection fixed reloc	0.708
2020	1	31	4	40	20.537	38.0214	22.945	8.64	-0.1	2	2020-01-31-04-40-20	2020-05-13-14-33-11	2	1	35	38	42	47	52	Detection fixed reloc	0.82
2020	1	31	6	31	32.077	38.0214	22.945	8.64	0.2	2	2020-01-31-06-31-32	2020-05-13-14-33-11	2	1	35	38	42	47	52	Detection fixed reloc	0.706
2020	1	31	7	43	32.177	38.0214	22.945	8.64	0.2	2	2020-01-31-07-43-32	2020-05-13-14-33-11	2	1	35	38	42	47	52	Detection fixed reloc	0.796
2020	1	31	8	19	49.817	38.0214	22.945	8.64	-0.1	2	2020-01-31-08-19-49	2020-05-13-14-33-11	2	1	35	38	42	47	52	Detection fixed reloc	0.707
2020	1	31	9	23	26.997	38.0214	22.945	8.64	0.1	2	2020-01-31-09-23-26	2020-05-13-14-33-11	2	1	35	38	42	47	52	Detection fixed reloc	0.823
2020	1	31	10	11	55.077	38.0214	22.945	8.64	0	2	2020-01-31-10-11-55	2020-05-13-14-33-11	2	1	35	38	42	47	52	Detection fixed reloc	0.663
2020	1	31	10	12	48.757	38.0214	22.945	8.64	0.1	2	2020-01-31-10-12-48	2020-05-13-14-33-11	2	1	35	38	42	47	52	Detection fixed reloc	0.804
2020	1	31	12	8	31.317	38.0214	22.945	8.64	0.6	2	2020-01-31-12-08-31	2020-05-13-14-33-11	2	1	35	38	42	47	52	Detection fixed reloc	0.603
2020	1	31	12	10	8.372	38.2011	22.7355	7.1	1.1	2	2020-01-31-12-10-08	2020-01-17-19-10-15	1	6	7	7	15	17	17	Detection fixed reloc	0.737
2020	1	31	12	28	33.997	38.0214	22.945	8.64	1	2	2020-01-31-12-28-33	2020-05-13-14-33-11	2	1	35	38	42	47	52	Detection fixed reloc	0.766
2020	1	31	15	19	6.937	38.0214	22.945	8.64	0.6	2	2020-01-31-15-19-06	2020-05-13-14-33-11	2	1	35	38	42	47	52	Detection fixed reloc	0.602
2020	1	31	19	45	27.26	38.1746	22.7206	8.95	0.4	2	2020-01-31-19-45-27	2020-03-16-21-21-17	24	6	36	39	43	48	53	Detection fixed reloc	0.654
2020	1	31	21	23	43.829	38.0632	22.9297	7.05	0.4	2	2020-01-31-21-23-43	2020-05-15-15-41-15	2	2	24	26	28	32	36	Detection fixed reloc	0.642
2020	2	1	2	30	40.8	38.1807	22.7056	4.46	0.8	2	2020-02-01-02-30-40	2021-01-13-08-45-03	25	6	37	40	44	49	54	Detection fixed reloc	0.645
2020	2	1	8	14	46.689	38.1867	22.7344	12.22	1	2	2020-02-01-08-14-46	2020-03-18-07-59-23	24	6	36	39	43	48	55	Detection fixed reloc	0.685
2020	2	1	12	37	59.212	38.2011	22.7355	7.1	1.1	2	2020-02-01-12-37-59	2020-01-17-19-10-15	1	6	7	7	15	17	17	Detection fixed reloc	0.719
2020	2	1	18	47	38.74	38.1746	22.7206	8.95	0.4	2	2020-02-01-18-47-38	2020-03-16-21-21-17	24	6	36	39	43	48	53	Detection fixed reloc	0.866
2020	2	1	19	42	57.56	38.1746	22.7206	8.95	0.4	2	2020-02-01-19-42-57	2020-03-16-21-21-17	24	6	36	39	43	48	53	Detection fixed reloc	0.75
2020	2	1	21	58	41.023	38.197	22.5154	14.44	1.6	1	2020-02-01-21-58-41	2020-02-01-21-58-41	26	10	38	41	45	50	56	Template reloc	1
2020	2	2	4	10	53.32	38.042	22.8713	8.47	0.4	2	2020-02-02-04-10-53	2020-08-06-21-33-02	2	3	22	33	36	41	46	Detection fixed reloc	0.609
2020	2	2	10	38	43.677	38.09	22.7769	13.98	0.7	2	2020-02-02-10-38-43	2020-09-07-06-26-49	23	4	33	36	39	44	49	Detection fixed reloc	0.849
2020	2	2	10	49	28.437	38.09	22.7769	13.98	1.4	2	2020-02-02-10-49-28	2020-09-07-06-26-49	23	4	33	36	39	44	49	Detection fixed reloc	0.945
2020	2	2	11	7	55.097	38.09	22.7769	13.98	0.6	2	2020-02-02-11-07-55	2020-09-07-06-26-49	23	4	33	36	39	44	49	Detection fixed reloc	0.607
2020	2	2	14	43	19.955	38.2541	22.7228	14.39	0.9	2	2020-02-02-14-43-19	2020-02-18-04-30-41	22	7	32	35	38	43	48	Detection fixed reloc	0.675
2020	2	2	17	17	2.191	38.1782	22.7135	6.23	0.9	2	2020-02-02-17-17-02	2020-01-18-00-45-42	1	6	1	1	1	1	1	Detection fixed reloc	0.931
2020	2	2	18	46	58.2	38.042	22.8713	8.47	0.3	2	2020-02-02-18-46-58	2020-08-06-21-33-02	2	3	22	33	36	41	46	Detection fixed reloc	0.614
2020	2	2	19	27	34.486	38.0532	22.8755	9.14	-0.1	2	2020-02-02-19-27-34	2020-07-20-15-03-27	2	3	2	2	2	16	16	Detection fixed reloc	0.877
2020	2	2	22	35	30.089	38.1728	22.6171	11.34	0.8	2	2020-02-02-22-35-30	2021-01-08-19-00-40	27	9	39	42	46	51	57	Detection fixed reloc	0.756
2020	2	3	3	1	47.548	38.0831	22.7955	7.76	1.1	1	2020-02-03-03-01-47	2020-02-03-03-01-47	28	4	40	43	47	52	58	Template reloc	1
2020	2	3	4	51	49.311	38.1782	22.7135	6.23	0.5	2	2020-02-03-04-51-49	2020-01-18-00-45-42	1	6	1	1	1	1	1	Detection fixed reloc	0.761
2020	2	3	7	56	54.301	38.1816	22.7122	8.2	1	2	2020-02-03-07-56-54	2020-01-26-00-16-27	1	6	1	1	1	1	30	Detection fixed reloc	0.643
2020	2	3	7	57	44.491	38.1782	22.7135	6.23	0.8	2	2020-02-03-07-57-44	2020-01-18-00-45-42	1	6	1	1	1	1	1	Detection fixed reloc	0.8
2020	2	3	10	33	28.711	38.2629	22.7272	5.74	1.3	2	2020-02-03-10-33-28	2020-02-21-05-44-36	22	7	32	35	38	43	48	Detection fixed reloc	0.87
2020	2	3	12	34	48.76	38.1876	22.7203	11.26	0.8	2	2020-02-03-12-34-48	2020-01-17-15-51-20	1	6	10	10	10	12	12	Detection fixed reloc	0.869
2020	2	3	13	34	3.41	38.1108	22.8872	9.56	1.5	2	2020-02-03-13-34-03	2020-02-03-16-25-45	29	2	41	44	48	53	59	Detection fixed reloc	0.808
2020	2	3	14	16	37.37	38.1108	22.8872	9.56	0.9	2	2020-02-03-14-16-37	2020-02-03-16-25-45	29	2	41	44	48	53	59	Detection fixed reloc	0.78
2020	2	3	14	38	3.51	38.1108	22.8872	9.56	0.9	2	2020-02-03-14-38-03	2020-02-03-16-25-45	29	2	41	44	48	53	59	Detection fixed reloc	0.802
2020	2	3	14	48	8.868	38.1649	22.685	7.48	1	2	2020-02-03-14-48-08	2020-02-08-04-06-44	30	8	42	45	49	54	60	Detection fixed reloc	0.662
2020	2	3	15	1	15.57	38.1108	22.8872	9.56	0.7	2	2020-02-03-15-01-15	2020-02-03-16-25-45	29	2	41	44	48	53	59	Detection fixed reloc	0.949
2020	2	3	16	25	44.28	38.1108	22.8872	9.56	1.6	1	2020-02-03-16-25-45	2020-02-03-16-25-45	29	2	41	44	48	53	59	Template reloc	1
2020	2	3	23	6	26.77	38.1108	22.8872	9.56	0.7	2	2020-02-03-23-06-26	2020-02-03-16-25-45	29	2	41	44	48	53	59	Detection fixed reloc	0.715
2020	2	3	23	27	30.09	38.1108	22.8872	9.56	0.4	2	2020-02-03-23-27-30	2020-02-03-16-25-45	29	2	41	44	48	53	59	Detection fixed reloc	0.919
2020	2	4	1	35	40.494	38.151	22.6776	10.69	0.8	2	2020-02-04-01-35-40	2020-02-08-01-50-55	30	8	42	45	49	54	60	Detection fixed reloc	0.656
2020	2	4	2	49	14.989	38.1157	22.7824	13.36	0.9	2	2020-02-04-02-49-14	2020-02-04-02-49-35	23	4	33	36	39	55	61	Detection fixed reloc	0.972
2020	2	4	2	49	34.899	38.1157	22.7824	13.36	1.8	1	2020-02-04-02-49-35	2020-02-04-02-49-35	23	4	33	36	39	55	61	Template reloc	1
2020	2	4	3	2	23.549	38.1157	22.7824	13.36	0.5	2	2020-02-04-03-02-23	2020-02-04-02-49-35	23	4	33	36	39	55	61	Detection fixed reloc	0.762
2020	2	4	18	14	40.477	38.0214	22.945	8.64	-0.2	2	2020-02-04-18-14-40	2020-05-13-14-33-11	2	1	35	38	42	47	52	Detection fixed reloc	0.832
2020	2	4	22	59	34.829	38.1157	22.7824	13.36	0.7	2	2020-02-04-22-59-34	2020-02-04-02-49-35	23	4	33	36	39	55	61	Detection fixed reloc	0.788
2020	2	5	1	57	22.124	38.0462	22.945	5.57	0.1	2	2020-02-05-01-57-22	2020-05-15-23-58-16	15	1	43	46	50	56	62	Detection fixed reloc	0.631
2020	2	5	5	9	17.182	38.0444	22.9008	12.66	0.7	2	2020-02-05-05-09-17	2020-07-21-02-59-28	2	3	2	2	2	2	2	Detection fixed reloc	0.82
2020	2	5	12	18	46.669	38.1157	22.7824	13.36	0.5	2	2020-02-05-12-18-46	2020-02-04-02-49-35	23	4	33	36	39	55	61	Detection fixed reloc	0.765
2020	2	6	2	4	28.057	38.09	22.7769	13.98	1.4	2	2020-02-06-02-04-28	2020-09-07-06-26-49	23	4	33	36	39	44	49	Detection fixed reloc	0.799
2020	2	6	2	5	13.409	38.1157	22.7824	13.36	1	2	2020-02-06-02-05-13	2020-02-04-02-49-35	23	4	33	36	39	55	61	Detection fixed reloc	0.647
2020	2	6	12	1	38.22	38.042	22.8713	8.47	0.6	2	2020-02-06-12-01-38	2020-08-06-21-33-02	2	3	22	33	36	41	46	Detection fixed reloc	0.638
2020	2	7	2	27	47.432	38.1156	22.7783	11.43	1.2	2	2020-02-07-02-27-47	2020-09-07-05-46-26	23	4	44	47	51	57	63	Detection fixed reloc	0.697
2020	2	7	12	22	29.07	38.1797	22.7088	9.37	1.1	2	2020-02-07-12-22-29	2020-01-17-05-30-33	1	6	20	21	22	24	32	Detection fixed reloc	0.736
2020	2	7	12	28	1.728	38.1882	22.716	6.17	1.2	2	2020-02-07-12-28-01	2020-01-26-00-02-03	1	6	20	21	22	24	25	Detection fixed reloc	0.766
2020	2	7	15	33	56.45	38.1797	22.7088	9.37	1.6	2	2020-02-07-15-33-56	2020-01-17-05-30-33	1	6	20	21	22	24	32	Detection fixed reloc	0.905
2020	2	7	16	8	42.137	38.1064	22.7453	30.81	0.5	2	2020-02-07-16-08-42	2020-01-25-23-14-33	1	8	3	3	3	3	3	Detection fixed reloc	0.668
2020	2	7	16	44	11.87	38.1797	22.7088	9.37	1.4	2	2020-02-07-16-44-11	2020-01-17-05-30-33	1	6	20	21	22	24	32	Detection fixed reloc	0.883
2020	2	7	18	14	40.297	38.1064	22.7453	30.81	0.6	2	2020-02-07-18-14-40	2020-01-25-23-14-33	1	8	3	3	3	3	3	Detection fixed reloc	0.766
2020	2	8	0	44	42.828	38.1649	22.685	7.48	0.6	2	2020-02-08-00-44-42	2020-02-08-04-06-44	30	8	42	45	49	54	60	Detection fixed reloc	0.669
2020	2	8	1	50	55.204	38.151	22.6776	10.69	1.9	1	2020-02-08-01-50-55	2020-02-08-01-50-55	30	8	42	45	49	54	60	Template reloc	1
2020	2	8	1	52	26.054	38.151	22.6776	10.69	0.8	2	2020-02-08-01-52-26	2020-02-08-01-50-55	30	8	42	45	49	54	60	Detection fixed reloc	0.663
2020	2	8	1	54	49.194	38.151	22.6776	10.69	1.1	2	2020-02-08-01-54-49	2020-02-08-01-50-55	30	8	42	45	49	54	60	Detection fixed reloc	0.715
2020	2	8	1	58	49.654	38.151	22.6776	10.69	1.1	2	2020-02-08-01-58-49	2020-02-08-01-50-55	30	8	42	45	49	54	60	Detection fixed reloc	0.747
2020	2	8	2	58	5.577	38.0214	22.945	8.64	-0.2	2	2020-02-08-02-58-05	2020-05-13-14-33-11	2	1	35	38	42	47	52	Detection fixed reloc	0.711
2020	2	8	4	6	44.508	38.1649	22.685	7.48	2	1	2020-02-08-04-06-44	2020-02-08-04-06-44	30	8	42	45	49	54	60	Template reloc	1
2020	2	8	5	18	35.894	38.151	22.6776	10.69	1.4	2	2020-02-08-05-18-35	2020-02-08-01-50-55	30	8	42	45	49	54	60	Detection fixed reloc	0.769
2020	2	8	6	24	33.114	38.151	22.6776	10.69	1.3	2	2020-02-08-06-24-33	2020-02-08-01-50-55	30	8	42	45	49	54	60	Detection fixed reloc	0.751
2020	2	8	8	21	0.0739975	38.151	22.6776	10.69	1.3	2	2020-02-08-08-21-00	2020-02-08-01-50-55	30	8	42	45	49	54	60	Detection fixed reloc	0.756
2020	2	8	21	52	5.2	38.042	22.8713	8.47	0.9	2	2020-02-08-21-52-05	2020-08-06-21-33-02	2	3	22	33	36	41	46	Detection fixed reloc	0.838
2020	2	8	22	56	20.513	38.0418	22.8828	12.6	-0.3	2	2020-02-08-22-56-20	2020-07-29-11-44-45	31	3	45	48	52	58	64	Detection fixed reloc	0.665
2020	2	8	23	47	4.98	38.042	22.8713	8.47	0.4	2	2020-02-08-23-47-04	2020-08-06-21-33-02	2	3	22	33	36	41	46	Detection fixed reloc	0.935
2020	2	9	3	51	17.072	38.0645	22.8566	7.02	0.8	2	2020-02-09-03-51-17	2020-01-11-20-25-13	13	2	18	19	20	22	22	Detection fixed reloc	0.945
2020	2	9	6	0	58.077	38.0451	22.8743	10.53	0.6	2	2020-02-09-06-00-58	2020-08-06-04-10-15	31	3	46	49	53	59	65	Detection fixed reloc	0.65
2020	2	9	6	13	30.053	38.0418	22.8828	12.6	-0.2	2	2020-02-09-06-13-30	2020-07-29-11-44-45	31	3	45	48	52	58	64	Detection fixed reloc	0.625
2020	2	9	11	27	4.224	38.1719	22.7179	16.04	1	2	2020-02-09-11-27-04	2020-01-26-05-05-47	1	6	20	21	22	33	37	Detection fixed reloc	0.61
2020	2	9	15	8	40.553	38.0418	22.8828	12.6	0.6	2	2020-02-09-15-08-40	2020-07-29-11-44-45	31	3	45	48	52	58	64	Detection fixed reloc	0.736
2020	2	9	22	54	12.333	38.0418	22.8828	12.6	-0.2	2	2020-02-09-22-54-12	2020-07-29-11-44-45	31	3	45	48	52	58	64	Detection fixed reloc	0.847
2020	2	10	0	40	34.156	38.0593	22.8551	6.75	1.8	1	2020-02-10-00-40-35	2020-02-10-00-40-35	16	2	25	27	29	34	38	Template reloc	1
2020	2	10	1	46	13.933	38.0418	22.8828	12.6	-0.1	2	2020-02-10-01-46-13	2020-07-29-11-44-45	31	3	45	48	52	58	64	Detection fixed reloc	0.836
2020	2	11	14	13	26.092	38.1156	22.7783	11.43	0.9	2	2020-02-11-14-13-26	2020-09-07-05-46-26	23	4	44	47	51	57	63	Detection fixed reloc	0.831
2020	2	11	18	26	22.438	38.0682	22.8646	7.18	0.5	2	2020-02-11-18-26-22	2020-03-08-08-27-31	10	2	47	50	54	60	66	Detection fixed reloc	0.744
2020	2	12	0	7	21.504	38.0714	22.8788	11.44	0.8	2	2020-02-12-00-07-21	2020-02-21-21-38-17	32	3	47	51	55	61	67	Detection fixed reloc	0.645
2020	2	12	15	58	18.592	38.1156	22.7783	11.43	0.8	2	2020-02-12-15-58-18	2020-09-07-05-46-26	23	4	44	47	51	57	63	Detection fixed reloc	0.747
2020	2	12	21	6	48.487	38.0786	22.8589	9.08	1	2	2020-02-12-21-06-48	2020-02-12-21-32-14	9	3	14	15	16	18	18	Detection fixed reloc	0.903
2020	2	12	21	7	57.967	38.0786	22.8589	9.08	-0.1	2	2020-02-12-21-07-57	2020-02-12-21-32-14	9	3	14	15	16	18	18	Detection fixed reloc	0.845
2020	2	12	21	14	12.947	38.0786	22.8589	9.08	-0.1	2	2020-02-12-21-14-12	2020-02-12-21-32-14	9	3	14	15	16	18	18	Detection fixed reloc	0.901
2020	2	12	21	18	13.34	38.0672	22.8553	10.29	0.2	2	2020-02-12-21-18-13	2020-02-12-22-11-14	9	3	14	15	16	25	26	Detection fixed reloc	0.694
2020	2	12	21	30	27.247	38.0786	22.8589	9.08	0.4	2	2020-02-12-21-30-27	2020-02-12-21-32-14	9	3	14	15	16	18	18	Detection fixed reloc	0.872
2020	2	12	21	32	14.157	38.0786	22.8589	9.08	1.6	1	2020-02-12-21-32-14	2020-02-12-21-32-14	9	3	14	15	16	18	18	Template reloc	1
2020	2	12	21	33	51.987	38.0786	22.8589	9.08	-0.2	2	2020-02-12-21-33-51	2020-02-12-21-32-14	9	3	14	15	16	18	18	Detection fixed reloc	0.74
2020	2	12	21	34	55.827	38.0786	22.8589	9.08	0.9	2	2020-02-12-21-34-55	2020-02-12-21-32-14	9	3	14	15	16	18	18	Detection fixed reloc	0.89
2020	2	12	21	35	46.147	38.0786	22.8589	9.08	0.4	2	2020-02-12-21-35-46	2020-02-12-21-32-14	9	3	14	15	16	18	18	Detection fixed reloc	0.828
2020	2	12	21	43	9.267	38.0786	22.8589	9.08	1	2	2020-02-12-21-43-09	2020-02-12-21-32-14	9	3	14	15	16	18	18	Detection fixed reloc	0.901
2020	2	12	21	47	16.84	38.0672	22.8553	10.29	0.4	2	2020-02-12-21-47-16	2020-02-12-22-11-14	9	3	14	15	16	25	26	Detection fixed reloc	0.604
2020	2	12	21	50	53.367	38.0786	22.8589	9.08	0.1	2	2020-02-12-21-50-53	2020-02-12-21-32-14	9	3	14	15	16	18	18	Detection fixed reloc	0.663
2020	2	12	21	56	16.027	38.0786	22.8589	9.08	0.7	2	2020-02-12-21-56-16	2020-02-12-21-32-14	9	3	14	15	16	18	18	Detection fixed reloc	0.869
2020	2	12	21	56	50.407	38.0786	22.8589	9.08	-0.2	2	2020-02-12-21-56-50	2020-02-12-21-32-14	9	3	14	15	16	18	18	Detection fixed reloc	0.784
2020	2	12	22	2	25.947	38.0786	22.8589	9.08	0.6	2	2020-02-12-22-02-25	2020-02-12-21-32-14	9	3	14	15	16	18	18	Detection fixed reloc	0.859
2020	2	12	22	4	47.567	38.0786	22.8589	9.08	0.4	2	2020-02-12-22-04-47	2020-02-12-21-32-14	9	3	14	15	16	18	18	Detection fixed reloc	0.865
2020	2	12	22	11	13.6	38.0672	22.8553	10.29	1.5	1	2020-02-12-22-11-14	2020-02-12-22-11-14	9	3	14	15	16	25	26	Template reloc	1
2020	2	12	22	11	54.08	38.0672	22.8553	10.29	0	2	2020-02-12-22-11-54	2020-02-12-22-11-14	9	3	14	15	16	25	26	Detection fixed reloc	0.697
2020	2	12	22	15	25.24	38.0672	22.8553	10.29	0.2	2	2020-02-12-22-15-25	2020-02-12-22-11-14	9	3	14	15	16	25	26	Detection fixed reloc	0.823
2020	2	12	22	31	42.427	38.0786	22.8589	9.08	0	2	2020-02-12-22-31-42	2020-02-12-21-32-14	9	3	14	15	16	18	18	Detection fixed reloc	0.727
2020	2	13	8	52	41.491	38.2169	22.5601	11.34	1.1	2	2020-02-13-08-52-41	2021-02-13-14-37-38	33	10	48	52	56	62	68	Detection fixed reloc	0.797
2020	2	13	15	19	41.075	38.1173	22.847	3.9	0.5	2	2020-02-13-15-19-41	2020-11-05-12-00-34	34	2	49	53	57	63	69	Detection fixed reloc	0.645
2020	2	13	15	21	25.884	38.0714	22.8788	11.44	0.7	2	2020-02-13-15-21-25	2020-02-21-21-38-17	32	3	47	51	55	61	67	Detection fixed reloc	0.618
2020	2	13	15	53	15.048	38.0762	22.8787	11.74	0.8	2	2020-02-13-15-53-15	2020-02-24-10-31-24	35	3	27	54	58	64	70	Detection fixed reloc	0.609
2020	2	13	17	44	34.437	38.0175	22.9372	11.51	0.6	2	2020-02-13-17-44-34	2020-08-15-01-51-15	17	1	26	28	30	35	39	Detection fixed reloc	0.609
2020	2	14	0	11	26.344	38.0714	22.8788	11.44	0.6	2	2020-02-14-00-11-26	2020-02-21-21-38-17	32	3	47	51	55	61	67	Detection fixed reloc	0.646
2020	2	14	7	19	19.531	38.1782	22.7135	6.23	1.1	2	2020-02-14-07-19-19	2020-01-18-00-45-42	1	6	1	1	1	1	1	Detection fixed reloc	0.719
2020	2	14	18	23	59.332	38.1156	22.7783	11.43	1.1	2	2020-02-14-18-23-59	2020-09-07-05-46-26	23	4	44	47	51	57	63	Detection fixed reloc	0.78
2020	2	14	20	10	54.604	38.1973	22.6211	16.31	1.7	1	2020-02-14-20-10-25	2020-02-14-20-10-25	36	9	50	55	59	65	71	Template reloc	1
2020	2	15	13	21	41.995	38.0794	22.9268	6.39	0.4	2	2020-02-15-13-21-41	2020-07-06-15-46-49	2	2	51	56	60	66	72	Detection fixed reloc	0.628
2020	2	15	16	59	18.249	38.0635	22.8732	6.93	0.4	2	2020-02-15-16-59-18	2020-02-24-13-55-20	10	2	15	16	17	19	23	Detection fixed reloc	0.746
2020	2	15	19	36	40.308	38.0622	22.9382	7.68	0.1	2	2020-02-15-19-36-40	2020-05-18-06-05-04	2	2	34	37	40	45	50	Detection fixed reloc	0.791
2020	2	15	21	14	56.974	38.1589	22.6878	13.64	1	2	2020-02-15-21-14-56	2020-06-06-21-39-37	14	8	19	20	21	23	24	Detection fixed reloc	0.663
2020	2	15	22	43	24.615	38.0794	22.9268	6.39	-0.2	2	2020-02-15-22-43-24	2020-07-06-15-46-49	2	2	51	56	60	66	72	Detection fixed reloc	0.635
2020	2	15	23	21	49.815	38.0794	22.9268	6.39	0.1	2	2020-02-15-23-21-49	2020-07-06-15-46-49	2	2	51	56	60	66	72	Detection fixed reloc	0.602
2020	2	16	0	10	34.395	38.0794	22.9268	6.39	0.2	2	2020-02-16-00-10-34	2020-07-06-15-46-49	2	2	51	56	60	66	72	Detection fixed reloc	0.711
2020	2	16	2	18	47.967	38.0723	22.9323	8.1	0	2	2020-02-16-02-18-47	2020-05-24-02-51-46	2	2	52	57	61	67	73	Detection fixed reloc	0.697
2020	2	16	2	37	34.015	38.0794	22.9268	6.39	0.1	2	2020-02-16-02-37-34	2020-07-06-15-46-49	2	2	51	56	60	66	72	Detection fixed reloc	0.862
2020	2	16	2	47	12.595	38.0794	22.9268	6.39	1	2	2020-02-16-02-47-12	2020-07-06-15-46-49	2	2	51	56	60	66	72	Detection fixed reloc	0.858
2020	2	16	15	39	11.853	38.2527	22.7231	3.42	0.8	2	2020-02-16-15-39-11	2020-02-18-04-32-23	22	7	32	35	38	43	48	Detection fixed reloc	0.69
2020	2	16	22	18	13.104	38.0714	22.8788	11.44	0.4	2	2020-02-16-22-18-13	2020-02-21-21-38-17	32	3	47	51	55	61	67	Detection fixed reloc	0.689
2020	2	17	1	14	18.224	38.0714	22.8788	11.44	0.3	2	2020-02-17-01-14-18	2020-02-21-21-38-17	32	3	47	51	55	61	67	Detection fixed reloc	0.78
2020	2	17	6	30	33.237	38.2013	22.6239	15.89	1.9	1	2020-02-17-06-30-32	2020-02-17-06-30-32	37	9	53	58	62	68	74	Template reloc	1
2020	2	17	10	26	47.357	38.0214	22.945	8.64	-0.1	2	2020-02-17-10-26-47	2020-05-13-14-33-11	2	1	35	38	42	47	52	Detection fixed reloc	0.868
2020	2	17	15	12	15.356	38.0525	22.9061	11.36	0.8	2	2020-02-17-15-12-15	2020-04-28-02-43-29	18	2	27	29	31	36	41	Detection fixed reloc	0.659
2020	2	17	16	3	40.103	38.0689	22.9381	9.08	-0.1	2	2020-02-17-16-03-40	2020-05-16-19-59-13	2	2	51	56	60	69	75	Detection fixed reloc	0.644
2020	2	17	16	19	58.28	38.0769	22.9218	6.71	0	2	2020-02-17-16-19-58	2020-05-19-23-34-33	2	2	52	57	61	67	73	Detection fixed reloc	0.7
2020	2	17	16	41	47.059	38.0498	22.9395	9.81	0.1	2	2020-02-17-16-41-47	2020-07-12-06-57-27	2	2	51	56	60	69	75	Detection fixed reloc	0.602
2020	2	17	16	55	4.98	38.0769	22.9218	6.71	0.1	2	2020-02-17-16-55-04	2020-05-19-23-34-33	2	2	52	57	61	67	73	Detection fixed reloc	0.723
2020	2	17	17	31	4.657	38.0214	22.945	8.64	0.4	2	2020-02-17-17-31-04	2020-05-13-14-33-11	2	1	35	38	42	47	52	Detection fixed reloc	0.643
2020	2	17	18	51	32.828	38.1919	22.7393	5.71	0.6	2	2020-02-17-18-51-32	2020-02-20-06-08-36	1	6	9	9	9	70	76	Detection fixed reloc	0.605
2020	2	17	19	20	53.756	38.0525	22.9061	11.36	0.2	2	2020-02-17-19-20-53	2020-04-28-02-43-29	18	2	27	29	31	36	41	Detection fixed reloc	0.653
2020	2	17	23	44	31.241	38.1645	22.6028	23.5	1.1	1	2020-02-17-23-44-28	2020-02-17-23-44-28	38	10	54	59	63	71	77	Template reloc	1
2020	2	18	2	46	53.584	38.1969	22.6188	15.75	1.1	1	2020-02-18-02-46-53	2020-02-18-02-46-53	37	9	53	58	62	68	74	Template reloc	1
2020	2	18	4	6	2.333	38.2527	22.7231	3.42	0.4	2	2020-02-18-04-06-02	2020-02-18-04-32-23	22	7	32	35	38	43	48	Detection fixed reloc	0.706
2020	2	18	4	30	40.735	38.2541	22.7228	14.39	2	1	2020-02-18-04-30-41	2020-02-18-04-30-41	22	7	32	35	38	43	48	Template reloc	1
2020	2	18	4	32	22.763	38.2527	22.7231	3.42	1.7	1	2020-02-18-04-32-23	2020-02-18-04-32-23	22	7	32	35	38	43	48	Template reloc	1
2020	2	18	5	19	6.976	38.0525	22.9061	11.36	0.1	2	2020-02-18-05-19-06	2020-04-28-02-43-29	18	2	27	29	31	36	41	Detection fixed reloc	0.615
2020	2	18	5	34	27.668	38.1919	22.7393	5.71	0.7	2	2020-02-18-05-34-27	2020-02-20-06-08-36	1	6	9	9	9	70	76	Detection fixed reloc	0.82
2020	2	18	7	1	10.556	38.0525	22.9061	11.36	0.2	2	2020-02-18-07-01-10	2020-04-28-02-43-29	18	2	27	29	31	36	41	Detection fixed reloc	0.679
2020	2	18	7	30	55.277	38.2429	22.7226	19.26	1	2	2020-02-18-07-30-55	2020-04-16-05-20-49	22	7	32	35	38	72	78	Detection fixed reloc	0.763
2020	2	18	7	35	43.917	38.0175	22.9372	11.51	0	2	2020-02-18-07-35-43	2020-08-15-01-51-15	17	1	26	28	30	35	39	Detection fixed reloc	0.679
2020	2	18	7	48	38.549	38.0704	22.9217	7.47	0.2	2	2020-02-18-07-48-38	2020-02-24-01-40-56	10	2	15	16	17	19	19	Detection fixed reloc	0.609
2020	2	18	15	17	40.461	38.0413	22.9271	5.83	0.1	2	2020-02-18-15-17-40	2020-05-19-07-37-09	15	1	21	22	23	27	28	Detection fixed reloc	0.608
2020	2	18	17	39	11.293	38.0696	22.9391	7.83	0.4	2	2020-02-18-17-39-11	2020-06-25-12-10-04	2	2	34	37	64	73	79	Detection fixed reloc	0.607
2020	2	18	18	23	31.164	38.0714	22.8788	11.44	0.1	2	2020-02-18-18-23-31	2020-02-21-21-38-17	32	3	47	51	55	61	67	Detection fixed reloc	0.674
2020	2	18	19	25	30.297	38.2429	22.7226	19.26	1.1	2	2020-02-18-19-25-30	2020-04-16-05-20-49	22	7	32	35	38	72	78	Detection fixed reloc	0.872
2020	2	18	19	30	59.893	38.2527	22.7231	3.42	0.9	2	2020-02-18-19-30-59	2020-02-18-04-32-23	22	7	32	35	38	43	48	Detection fixed reloc	0.632
2020	2	18	19	47	32.533	38.2527	22.7231	3.42	0.4	2	2020-02-18-19-47-32	2020-02-18-04-32-23	22	7	32	35	38	43	48	Detection fixed reloc	0.66
2020	2	18	21	24	58.956	38.0525	22.9061	11.36	0.6	2	2020-02-18-21-24-58	2020-04-28-02-43-29	18	2	27	29	31	36	41	Detection fixed reloc	0.686
2020	2	19	0	48	28.444	38.0714	22.8788	11.44	0	2	2020-02-19-00-48-28	2020-02-21-21-38-17	32	3	47	51	55	61	67	Detection fixed reloc	0.737
2020	2	19	4	2	0.804001	38.0714	22.8788	11.44	-0.1	2	2020-02-19-04-02-00	2020-02-21-21-38-17	32	3	47	51	55	61	67	Detection fixed reloc	0.751
2020	2	19	8	52	59.494	38.1819	22.4372	5.21	1.8	1	2020-02-19-08-52-59	2020-02-19-08-52-59	39	0	55	60	65	74	80	Template loc	1
2020	2	19	9	35	18.762	38.0527	22.9332	7.94	0.5	2	2020-02-19-09-35-18	2020-08-05-05-35-16	2	2	56	61	66	75	81	Detection fixed reloc	0.685
2020	2	19	11	52	52.557	38.0214	22.945	8.64	0.6	2	2020-02-19-11-52-52	2020-05-13-14-33-11	2	1	35	38	42	47	52	Detection fixed reloc	0.612
2020	2	19	11	56	49.257	38.0214	22.945	8.64	0.7	2	2020-02-19-11-56-49	2020-05-13-14-33-11	2	1	35	38	42	47	52	Detection fixed reloc	0.606
2020	2	19	15	24	46.617	38.0175	22.9372	11.51	-0.1	2	2020-02-19-15-24-46	2020-08-15-01-51-15	17	1	26	28	30	35	39	Detection fixed reloc	0.674
2020	2	19	15	58	8.748	38.1919	22.7393	5.71	0.5	2	2020-02-19-15-58-08	2020-02-20-06-08-36	1	6	9	9	9	70	76	Detection fixed reloc	0.782
2020	2	19	20	49	58.964	38.0714	22.8788	11.44	1.1	2	2020-02-19-20-49-58	2020-02-21-21-38-17	32	3	47	51	55	61	67	Detection fixed reloc	0.842
2020	2	19	20	53	31.624	38.0714	22.8788	11.44	0.2	2	2020-02-19-20-53-31	2020-02-21-21-38-17	32	3	47	51	55	61	67	Detection fixed reloc	0.919
2020	2	19	22	23	8.584	38.0714	22.8788	11.44	0.1	2	2020-02-19-22-23-08	2020-02-21-21-38-17	32	3	47	51	55	61	67	Detection fixed reloc	0.78
2020	2	19	23	17	34.665	38.0642	22.8972	4.57	0.3	2	2020-02-19-23-17-34	2020-10-17-00-41-59	9	2	57	62	67	76	82	Detection fixed reloc	0.633
2020	2	19	23	39	34.768	38.1919	22.7393	5.71	0.6	2	2020-02-19-23-39-34	2020-02-20-06-08-36	1	6	9	9	9	70	76	Detection fixed reloc	0.643
2020	2	20	6	8	36.128	38.1919	22.7393	5.71	1.3	1	2020-02-20-06-08-36	2020-02-20-06-08-36	1	6	9	9	9	70	76	Template reloc	1
2020	2	20	6	10	4.388	38.1919	22.7393	5.71	0.7	2	2020-02-20-06-10-04	2020-02-20-06-08-36	1	6	9	9	9	70	76	Detection fixed reloc	0.869
2020	2	20	6	11	28.637	38.0175	22.9372	11.51	0.3	2	2020-02-20-06-11-28	2020-08-15-01-51-15	17	1	26	28	30	35	39	Detection fixed reloc	0.613
2020	2	20	6	28	5.037	38.1804	22.7336	15.89	1.2	2	2020-02-20-06-28-05	2021-03-06-13-20-01	40	6	58	63	68	77	83	Detection fixed reloc	0.601
2020	2	20	11	41	21.729	38.0635	22.8732	6.93	0.7	2	2020-02-20-11-41-21	2020-02-24-13-55-20	10	2	15	16	17	19	23	Detection fixed reloc	0.647
2020	2	20	12	5	4.629	38.0635	22.8732	6.93	0.6	2	2020-02-20-12-05-04	2020-02-24-13-55-20	10	2	15	16	17	19	23	Detection fixed reloc	0.631
2020	2	20	17	22	41.283	38.0689	22.9381	9.08	-0.3	2	2020-02-20-17-22-41	2020-05-16-19-59-13	2	2	51	56	60	69	75	Detection fixed reloc	0.606
2020	2	20	23	13	18.463	38.0689	22.9381	9.08	-0.1	2	2020-02-20-23-13-18	2020-05-16-19-59-13	2	2	51	56	60	69	75	Detection fixed reloc	0.754
2020	2	20	23	26	55.837	38.2429	22.7226	19.26	1	2	2020-02-20-23-26-55	2020-04-16-05-20-49	22	7	32	35	38	72	78	Detection fixed reloc	0.621
2020	2	20	23	44	39.462	38.0767	22.8777	9.97	0.1	2	2020-02-20-23-44-39	2021-05-28-18-54-24	41	3	59	64	69	78	84	Detection fixed reloc	0.627
2020	2	20	23	52	42.327	38.0723	22.9323	8.1	-0.3	2	2020-02-20-23-52-42	2020-05-24-02-51-46	2	2	52	57	61	67	73	Detection fixed reloc	0.611
2020	2	21	0	4	52.44	38.0769	22.9218	6.71	-0.1	2	2020-02-21-00-04-52	2020-05-19-23-34-33	2	2	52	57	61	67	73	Detection fixed reloc	0.662
2020	2	21	0	7	5.777	38.1738	22.733	12.21	0.9	2	2020-02-21-00-07-05	2020-02-21-21-03-09	42	6	60	65	70	79	85	Detection fixed reloc	0.883
2020	2	21	0	50	19.644	38.0714	22.8788	11.44	-0.1	2	2020-02-21-00-50-19	2020-02-21-21-38-17	32	3	47	51	55	61	67	Detection fixed reloc	0.821
2020	2	21	1	26	47.884	38.0714	22.8788	11.44	0.4	2	2020-02-21-01-26-47	2020-02-21-21-38-17	32	3	47	51	55	61	67	Detection fixed reloc	0.947
2020	2	21	5	44	17.977	38.2429	22.7226	19.26	1.2	2	2020-02-21-05-44-17	2020-04-16-05-20-49	22	7	32	35	38	72	78	Detection fixed reloc	0.811
2020	2	21	5	44	35.021	38.2629	22.7272	5.74	2.2	1	2020-02-21-05-44-36	2020-02-21-05-44-36	22	7	32	35	38	43	48	Template reloc	1
2020	2	21	12	23	43.044	38.0714	22.8788	11.44	0.7	2	2020-02-21-12-23-43	2020-02-21-21-38-17	32	3	47	51	55	61	67	Detection fixed reloc	0.604
2020	2	21	15	7	15.487	38.0723	22.9323	8.1	0.6	2	2020-02-21-15-07-15	2020-05-24-02-51-46	2	2	52	57	61	67	73	Detection fixed reloc	0.765
2020	2	21	15	11	46.34	38.0769	22.9218	6.71	0.3	2	2020-02-21-15-11-46	2020-05-19-23-34-33	2	2	52	57	61	67	73	Detection fixed reloc	0.77
2020	2	21	15	17	48.72	38.0769	22.9218	6.71	0.2	2	2020-02-21-15-17-48	2020-05-19-23-34-33	2	2	52	57	61	67	73	Detection fixed reloc	0.6
2020	2	21	16	17	50.577	38.0214	22.945	8.64	-0.2	2	2020-02-21-16-17-50	2020-05-13-14-33-11	2	1	35	38	42	47	52	Detection fixed reloc	0.644
2020	2	21	18	50	7.804	38.0714	22.8788	11.44	0.3	2	2020-02-21-18-50-07	2020-02-21-21-38-17	32	3	47	51	55	61	67	Detection fixed reloc	0.647
2020	2	21	19	19	23.483	38.0689	22.9381	9.08	-0.1	2	2020-02-21-19-19-23	2020-05-16-19-59-13	2	2	51	56	60	69	75	Detection fixed reloc	0.665
2020	2	21	20	40	14.787	38.0723	22.9323	8.1	-0.2	2	2020-02-21-20-40-14	2020-05-24-02-51-46	2	2	52	57	61	67	73	Detection fixed reloc	0.685
2020	2	21	21	3	9.107	38.1738	22.733	12.21	1.6	1	2020-02-21-21-03-09	2020-02-21-21-03-09	42	6	60	65	70	79	85	Template reloc	1
2020	2	21	21	13	49.717	38.1738	22.733	12.21	0.9	2	2020-02-21-21-13-49	2020-02-21-21-03-09	42	6	60	65	70	79	85	Detection fixed reloc	0.877
2020	2	21	21	25	41.364	38.0714	22.8788	11.44	-0.2	2	2020-02-21-21-25-41	2020-02-21-21-38-17	32	3	47	51	55	61	67	Detection fixed reloc	0.682
2020	2	21	21	27	54.948	38.0762	22.8787	11.74	1.1	2	2020-02-21-21-27-54	2020-02-24-10-31-24	35	3	27	54	58	64	70	Detection fixed reloc	0.666
2020	2	21	21	38	16.054	38.0714	22.8788	11.44	1.8	1	2020-02-21-21-38-17	2020-02-21-21-38-17	32	3	47	51	55	61	67	Template reloc	1
2020	2	21	21	45	12.404	38.0714	22.8788	11.44	0.1	2	2020-02-21-21-45-12	2020-02-21-21-38-17	32	3	47	51	55	61	67	Detection fixed reloc	0.717
2020	2	21	21	46	20.128	38.0762	22.8787	11.74	0.3	2	2020-02-21-21-46-20	2020-02-24-10-31-24	35	3	27	54	58	64	70	Detection fixed reloc	0.671
2020	2	21	22	39	54.728	38.0762	22.8787	11.74	0.3	2	2020-02-21-22-39-54	2020-02-24-10-31-24	35	3	27	54	58	64	70	Detection fixed reloc	0.651
2020	2	21	23	25	18.069	38.0704	22.9217	7.47	0.2	2	2020-02-21-23-25-18	2020-02-24-01-40-56	10	2	15	16	17	19	19	Detection fixed reloc	0.659
2020	2	21	23	51	3.475	38.0794	22.9268	6.39	0.1	2	2020-02-21-23-51-03	2020-07-06-15-46-49	2	2	51	56	60	66	72	Detection fixed reloc	0.664
2020	2	22	0	27	49.035	38.0794	22.9268	6.39	0	2	2020-02-22-00-27-49	2020-07-06-15-46-49	2	2	51	56	60	66	72	Detection fixed reloc	0.711
2020	2	22	0	47	26.104	38.0714	22.8788	11.44	0.1	2	2020-02-22-00-47-26	2020-02-21-21-38-17	32	3	47	51	55	61	67	Detection fixed reloc	0.647
2020	2	22	0	52	28.864	38.0714	22.8788	11.44	0.2	2	2020-02-22-00-52-28	2020-02-21-21-38-17	32	3	47	51	55	61	67	Detection fixed reloc	0.661
2020	2	22	1	21	47.984	38.0714	22.8788	11.44	0.4	2	2020-02-22-01-21-47	2020-02-21-21-38-17	32	3	47	51	55	61	67	Detection fixed reloc	0.699
2020	2	22	1	24	27.444	38.0714	22.8788	11.44	0	2	2020-02-22-01-24-27	2020-02-21-21-38-17	32	3	47	51	55	61	67	Detection fixed reloc	0.807
2020	2	22	1	50	38.504	38.0714	22.8788	11.44	0.2	2	2020-02-22-01-50-38	2020-02-21-21-38-17	32	3	47	51	55	61	67	Detection fixed reloc	0.672
2020	2	22	2	24	19.668	38.0762	22.8787	11.74	1.2	2	2020-02-22-02-24-19	2020-02-24-10-31-24	35	3	27	54	58	64	70	Detection fixed reloc	0.672
2020	2	22	2	31	8.508	38.0762	22.8787	11.74	0.4	2	2020-02-22-02-31-08	2020-02-24-10-31-24	35	3	27	54	58	64	70	Detection fixed reloc	0.623
2020	2	22	2	41	41.544	38.0714	22.8788	11.44	0.3	2	2020-02-22-02-41-41	2020-02-21-21-38-17	32	3	47	51	55	61	67	Detection fixed reloc	0.799
2020	2	22	3	14	25.144	38.0714	22.8788	11.44	0.7	2	2020-02-22-03-14-25	2020-02-21-21-38-17	32	3	47	51	55	61	67	Detection fixed reloc	0.681
2020	2	22	3	17	0.223	38.0689	22.9381	9.08	0.3	2	2020-02-22-03-17-00	2020-05-16-19-59-13	2	2	51	56	60	69	75	Detection fixed reloc	0.697
2020	2	22	3	35	22.423	38.0689	22.9381	9.08	-0.2	2	2020-02-22-03-35-22	2020-05-16-19-59-13	2	2	51	56	60	69	75	Detection fixed reloc	0.723
2020	2	22	7	46	23.828	38.0762	22.8787	11.74	0.2	2	2020-02-22-07-46-23	2020-02-24-10-31-24	35	3	27	54	58	64	70	Detection fixed reloc	0.793
2020	2	22	7	57	48.068	38.1919	22.7393	5.71	0.7	2	2020-02-22-07-57-48	2020-02-20-06-08-36	1	6	9	9	9	70	76	Detection fixed reloc	0.725
2020	2	22	8	53	56.235	38.0794	22.9268	6.39	0	2	2020-02-22-08-53-56	2020-07-06-15-46-49	2	2	51	56	60	66	72	Detection fixed reloc	0.734
2020	2	22	9	1	19.888	38.0762	22.8787	11.74	0.6	2	2020-02-22-09-01-19	2020-02-24-10-31-24	35	3	27	54	58	64	70	Detection fixed reloc	0.698
2020	2	22	9	4	26.015	38.0794	22.9268	6.39	0.1	2	2020-02-22-09-04-26	2020-07-06-15-46-49	2	2	51	56	60	66	72	Detection fixed reloc	0.666
2020	2	22	10	16	4.75	38.0298	22.8264	31.54	1.5	1	2020-02-22-10-16-04	2020-02-22-10-16-04	43	0	61	66	71	80	86	Template loc	1
2020	2	22	12	30	16.495	38.0794	22.9268	6.39	1.3	2	2020-02-22-12-30-16	2020-07-06-15-46-49	2	2	51	56	60	66	72	Detection fixed reloc	0.78
2020	2	22	12	32	7.915	38.0794	22.9268	6.39	0.3	2	2020-02-22-12-32-07	2020-07-06-15-46-49	2	2	51	56	60	66	72	Detection fixed reloc	0.718
2020	2	22	12	36	31.635	38.0794	22.9268	6.39	0.2	2	2020-02-22-12-36-31	2020-07-06-15-46-49	2	2	51	56	60	66	72	Detection fixed reloc	0.754
2020	2	22	12	55	42.035	38.0794	22.9268	6.39	0.1	2	2020-02-22-12-55-42	2020-07-06-15-46-49	2	2	51	56	60	66	72	Detection fixed reloc	0.68
2020	2	22	13	28	17.518	38.0682	22.8646	7.18	0.8	2	2020-02-22-13-28-17	2020-03-08-08-27-31	10	2	47	50	54	60	66	Detection fixed reloc	0.778
2020	2	22	14	11	11.915	38.0794	22.9268	6.39	0.1	2	2020-02-22-14-11-11	2020-07-06-15-46-49	2	2	51	56	60	66	72	Detection fixed reloc	0.658
2020	2	22	15	18	51.355	38.0794	22.9268	6.39	0.2	2	2020-02-22-15-18-51	2020-07-06-15-46-49	2	2	51	56	60	66	72	Detection fixed reloc	0.68
2020	2	22	15	22	56.258	38.0682	22.8646	7.18	0.4	2	2020-02-22-15-22-56	2020-03-08-08-27-31	10	2	47	50	54	60	66	Detection fixed reloc	0.727
2020	2	22	15	29	29.944	38.0714	22.8788	11.44	1.1	2	2020-02-22-15-29-29	2020-02-21-21-38-17	32	3	47	51	55	61	67	Detection fixed reloc	0.8
2020	2	22	15	32	1.724	38.0714	22.8788	11.44	0.2	2	2020-02-22-15-32-01	2020-02-21-21-38-17	32	3	47	51	55	61	67	Detection fixed reloc	0.607
2020	2	22	15	35	19.084	38.0714	22.8788	11.44	0.8	2	2020-02-22-15-35-19	2020-02-21-21-38-17	32	3	47	51	55	61	67	Detection fixed reloc	0.837
2020	2	22	15	55	9.508	38.1919	22.7393	5.71	1	2	2020-02-22-15-55-09	2020-02-20-06-08-36	1	6	9	9	9	70	76	Detection fixed reloc	0.862
2020	2	22	16	5	33.184	38.0714	22.8788	11.44	0.2	2	2020-02-22-16-05-33	2020-02-21-21-38-17	32	3	47	51	55	61	67	Detection fixed reloc	0.674
2020	2	22	17	7	36.328	38.0762	22.8787	11.74	0.2	2	2020-02-22-17-07-36	2020-02-24-10-31-24	35	3	27	54	58	64	70	Detection fixed reloc	0.807
2020	2	22	17	50	39.255	38.0794	22.9268	6.39	0.2	2	2020-02-22-17-50-39	2020-07-06-15-46-49	2	2	51	56	60	66	72	Detection fixed reloc	0.667
2020	2	22	18	0	50.088	38.0762	22.8787	11.74	0.2	2	2020-02-22-18-00-50	2020-02-24-10-31-24	35	3	27	54	58	64	70	Detection fixed reloc	0.761
2020	2	22	18	5	46.208	38.0762	22.8787	11.74	0.9	2	2020-02-22-18-05-46	2020-02-24-10-31-24	35	3	27	54	58	64	70	Detection fixed reloc	0.778
2020	2	22	18	10	23.124	38.0714	22.8788	11.44	0.5	2	2020-02-22-18-10-23	2020-02-21-21-38-17	32	3	47	51	55	61	67	Detection fixed reloc	0.764
2020	2	22	18	14	40.464	38.0714	22.8788	11.44	0.7	2	2020-02-22-18-14-40	2020-02-21-21-38-17	32	3	47	51	55	61	67	Detection fixed reloc	0.721
2020	2	22	18	15	38.764	38.0714	22.8788	11.44	0.4	2	2020-02-22-18-15-38	2020-02-21-21-38-17	32	3	47	51	55	61	67	Detection fixed reloc	0.752
2020	2	22	18	35	51.284	38.0714	22.8788	11.44	0.5	2	2020-02-22-18-35-51	2020-02-21-21-38-17	32	3	47	51	55	61	67	Detection fixed reloc	0.622
2020	2	22	18	49	26.344	38.0714	22.8788	11.44	0.3	2	2020-02-22-18-49-26	2020-02-21-21-38-17	32	3	47	51	55	61	67	Detection fixed reloc	0.622
2020	2	22	19	20	13.988	38.0762	22.8787	11.74	0.5	2	2020-02-22-19-20-13	2020-02-24-10-31-24	35	3	27	54	58	64	70	Detection fixed reloc	0.741
2020	2	22	20	27	57.371	38.1782	22.7135	6.23	0.9	2	2020-02-22-20-27-57	2020-01-18-00-45-42	1	6	1	1	1	1	1	Detection fixed reloc	0.644
2020	2	22	20	57	18.459	38.0717	22.9362	7.59	0.4	2	2020-02-22-20-57-18	2020-05-22-22-11-25	2	2	34	37	64	81	87	Detection fixed reloc	0.732
2020	2	22	21	18	6.838	38.0682	22.8646	7.18	0.3	2	2020-02-22-21-18-06	2020-03-08-08-27-31	10	2	47	50	54	60	66	Detection fixed reloc	0.632
2020	2	22	21	57	18.908	38.0762	22.8787	11.74	0.1	2	2020-02-22-21-57-18	2020-02-24-10-31-24	35	3	27	54	58	64	70	Detection fixed reloc	0.702
2020	2	22	22	7	27.168	38.0762	22.8787	11.74	0.4	2	2020-02-22-22-07-27	2020-02-24-10-31-24	35	3	27	54	58	64	70	Detection fixed reloc	0.627
2020	2	22	22	43	14.424	38.0714	22.8788	11.44	0.3	2	2020-02-22-22-43-14	2020-02-21-21-38-17	32	3	47	51	55	61	67	Detection fixed reloc	0.744
2020	2	22	22	54	17.629	38.0635	22.8732	6.93	0.3	2	2020-02-22-22-54-17	2020-02-24-13-55-20	10	2	15	16	17	19	23	Detection fixed reloc	0.715
2020	2	22	23	49	48.66	38.2167	22.6591	11.22	1	2	2020-02-22-23-49-48	2020-11-19-15-41-55	44	6	62	67	72	82	88	Detection fixed reloc	0.637
2020	2	23	0	32	22.409	38.0635	22.8732	6.93	1.3	2	2020-02-23-00-32-22	2020-02-24-13-55-20	10	2	15	16	17	19	23	Detection fixed reloc	0.673
2020	2	23	1	13	40.655	38.0794	22.9268	6.39	-0.1	2	2020-02-23-01-13-40	2020-07-06-15-46-49	2	2	51	56	60	66	72	Detection fixed reloc	0.698
2020	2	23	5	12	52.826	38.0553	22.8729	9.65	1.2	2	2020-02-23-05-12-52	2020-02-26-10-09-35	10	3	15	16	17	19	19	Detection fixed reloc	0.798
2020	2	23	6	31	21.688	38.0762	22.8787	11.74	0.9	2	2020-02-23-06-31-21	2020-02-24-10-31-24	35	3	27	54	58	64	70	Detection fixed reloc	0.836
2020	2	23	7	2	18.888	38.0762	22.8787	11.74	0.4	2	2020-02-23-07-02-18	2020-02-24-10-31-24	35	3	27	54	58	64	70	Detection fixed reloc	0.656
2020	2	23	10	6	54.688	38.0762	22.8787	11.74	0.5	2	2020-02-23-10-06-54	2020-02-24-10-31-24	35	3	27	54	58	64	70	Detection fixed reloc	0.686
2020	2	23	10	21	48.408	38.0762	22.8787	11.74	0.9	2	2020-02-23-10-21-48	2020-02-24-10-31-24	35	3	27	54	58	64	70	Detection fixed reloc	0.606
2020	2	23	10	30	22.6	38.0769	22.9218	6.71	0.2	2	2020-02-23-10-30-22	2020-05-19-23-34-33	2	2	52	57	61	67	73	Detection fixed reloc	0.711
2020	2	23	10	46	34.428	38.0762	22.8787	11.74	0.3	2	2020-02-23-10-46-34	2020-02-24-10-31-24	35	3	27	54	58	64	70	Detection fixed reloc	0.914
2020	2	23	11	45	36.524	38.0714	22.8788	11.44	0.6	2	2020-02-23-11-45-36	2020-02-21-21-38-17	32	3	47	51	55	61	67	Detection fixed reloc	0.67
2020	2	23	12	9	27.969	38.0704	22.9217	7.47	0.2	2	2020-02-23-12-09-27	2020-02-24-01-40-56	10	2	15	16	17	19	19	Detection fixed reloc	0.617
2020	2	23	13	45	16.735	38.0794	22.9268	6.39	-0.1	2	2020-02-23-13-45-16	2020-07-06-15-46-49	2	2	51	56	60	66	72	Detection fixed reloc	0.603
2020	2	23	13	56	32.808	38.0762	22.8787	11.74	0.7	2	2020-02-23-13-56-32	2020-02-24-10-31-24	35	3	27	54	58	64	70	Detection fixed reloc	0.663
2020	2	23	17	43	40.564	38.0714	22.8788	11.44	1.1	2	2020-02-23-17-43-40	2020-02-21-21-38-17	32	3	47	51	55	61	67	Detection fixed reloc	0.659
2020	2	23	18	1	12.888	38.0762	22.8787	11.74	0	2	2020-02-23-18-01-12	2020-02-24-10-31-24	35	3	27	54	58	64	70	Detection fixed reloc	0.825
2020	2	23	18	29	55.557	38.0175	22.9372	11.51	0.1	2	2020-02-23-18-29-55	2020-08-15-01-51-15	17	1	26	28	30	35	39	Detection fixed reloc	0.609
2020	2	23	18	41	27.861	38.0146	22.6807	6.83	0.5	2	2020-02-23-18-41-27	2020-02-27-20-59-20	45	0	63	68	73	83	89	Detection fixed loc	0.926
2020	2	23	20	21	58.528	38.0762	22.8787	11.74	0.1	2	2020-02-23-20-21-58	2020-02-24-10-31-24	35	3	27	54	58	64	70	Detection fixed reloc	0.716
2020	2	24	0	10	44.329	38.0635	22.8732	6.93	0.4	2	2020-02-24-00-10-44	2020-02-24-13-55-20	10	2	15	16	17	19	23	Detection fixed reloc	0.709
2020	2	24	1	40	56.599	38.0704	22.9217	7.47	1.2	1	2020-02-24-01-40-56	2020-02-24-01-40-56	10	2	15	16	17	19	19	Template reloc	1
2020	2	24	2	27	8.809	38.0635	22.8732	6.93	0.2	2	2020-02-24-02-27-08	2020-02-24-13-55-20	10	2	15	16	17	19	23	Detection fixed reloc	0.688
2020	2	24	3	20	8.628	38.0762	22.8787	11.74	0.2	2	2020-02-24-03-20-08	2020-02-24-10-31-24	35	3	27	54	58	64	70	Detection fixed reloc	0.935
2020	2	24	4	2	4.108	38.0762	22.8787	11.74	-0.1	2	2020-02-24-04-02-04	2020-02-24-10-31-24	35	3	27	54	58	64	70	Detection fixed reloc	0.642
2020	2	24	4	26	31.811	38.1782	22.7135	6.23	0.7	2	2020-02-24-04-26-31	2020-01-18-00-45-42	1	6	1	1	1	1	1	Detection fixed reloc	0.671
2020	2	24	4	38	51.768	38.0762	22.8787	11.74	0.2	2	2020-02-24-04-38-51	2020-02-24-10-31-24	35	3	27	54	58	64	70	Detection fixed reloc	0.72
2020	2	24	5	12	55.345	38.0621	22.8736	8.66	-0.2	2	2020-02-24-05-12-55	2020-03-09-07-53-04	10	3	15	16	17	19	23	Detection fixed reloc	0.897
2020	2	24	5	24	10.105	38.0621	22.8736	8.66	-0.3	2	2020-02-24-05-24-10	2020-03-09-07-53-04	10	3	15	16	17	19	23	Detection fixed reloc	0.846
2020	2	24	6	39	41.362	38.0299	22.8833	10.02	0.6	2	2020-02-24-06-39-41	2020-02-24-18-54-02	10	3	15	16	17	19	19	Detection fixed reloc	0.721
2020	2	24	6	50	58.188	38.0762	22.8787	11.74	0.1	2	2020-02-24-06-50-58	2020-02-24-10-31-24	35	3	27	54	58	64	70	Detection fixed reloc	0.827
2020	2	24	7	18	54.328	38.0762	22.8787	11.74	0.8	2	2020-02-24-07-18-54	2020-02-24-10-31-24	35	3	27	54	58	64	70	Detection fixed reloc	0.607
2020	2	24	7	43	38.695	38.0794	22.9268	6.39	0.6	2	2020-02-24-07-43-38	2020-07-06-15-46-49	2	2	51	56	60	66	72	Detection fixed reloc	0.627
2020	2	24	8	2	15.675	38.0794	22.9268	6.39	0.3	2	2020-02-24-08-02-15	2020-07-06-15-46-49	2	2	51	56	60	66	72	Detection fixed reloc	0.655
2020	2	24	8	51	17.788	38.0762	22.8787	11.74	0.3	2	2020-02-24-08-51-17	2020-02-24-10-31-24	35	3	27	54	58	64	70	Detection fixed reloc	0.832
2020	2	24	9	19	47.068	38.0762	22.8787	11.74	0.3	2	2020-02-24-09-19-47	2020-02-24-10-31-24	35	3	27	54	58	64	70	Detection fixed reloc	0.739
2020	2	24	10	31	23.328	38.0762	22.8787	11.74	2	1	2020-02-24-10-31-24	2020-02-24-10-31-24	35	3	27	54	58	64	70	Template reloc	1
2020	2	24	10	47	5.148	38.0762	22.8787	11.74	0.4	2	2020-02-24-10-47-05	2020-02-24-10-31-24	35	3	27	54	58	64	70	Detection fixed reloc	0.732
2020	2	24	11	19	36.408	38.0762	22.8787	11.74	0.5	2	2020-02-24-11-19-36	2020-02-24-10-31-24	35	3	27	54	58	64	70	Detection fixed reloc	0.651
2020	2	24	11	38	49.248	38.0762	22.8787	11.74	0.4	2	2020-02-24-11-38-49	2020-02-24-10-31-24	35	3	27	54	58	64	70	Detection fixed reloc	0.749
2020	2	24	11	44	18.635	38.0794	22.9268	6.39	0	2	2020-02-24-11-44-18	2020-07-06-15-46-49	2	2	51	56	60	66	72	Detection fixed reloc	0.616
2020	2	24	11	46	23.888	38.0762	22.8787	11.74	0.5	2	2020-02-24-11-46-23	2020-02-24-10-31-24	35	3	27	54	58	64	70	Detection fixed reloc	0.778
2020	2	24	11	46	50.228	38.0762	22.8787	11.74	0.2	2	2020-02-24-11-46-50	2020-02-24-10-31-24	35	3	27	54	58	64	70	Detection fixed reloc	0.799
2020	2	24	12	18	52.088	38.0762	22.8787	11.74	1.1	2	2020-02-24-12-18-52	2020-02-24-10-31-24	35	3	27	54	58	64	70	Detection fixed reloc	0.767
2020	2	24	12	29	51.748	38.0762	22.8787	11.74	1.2	2	2020-02-24-12-29-51	2020-02-24-10-31-24	35	3	27	54	58	64	70	Detection fixed reloc	0.612
2020	2	24	12	40	22.128	38.0762	22.8787	11.74	0.3	2	2020-02-24-12-40-22	2020-02-24-10-31-24	35	3	27	54	58	64	70	Detection fixed reloc	0.787
2020	2	24	12	43	29.048	38.0762	22.8787	11.74	0.5	2	2020-02-24-12-43-29	2020-02-24-10-31-24	35	3	27	54	58	64	70	Detection fixed reloc	0.698
2020	2	24	12	57	46.953	38.2491	22.7201	16.25	1.7	1	2020-02-24-12-57-48	2020-02-24-12-57-48	22	7	32	35	38	72	90	Template reloc	1
2020	2	24	13	24	27.053	38.2527	22.7231	3.42	1	2	2020-02-24-13-24-27	2020-02-18-04-32-23	22	7	32	35	38	43	48	Detection fixed reloc	0.77
2020	2	24	13	55	19.179	38.0635	22.8732	6.93	2	1	2020-02-24-13-55-20	2020-02-24-13-55-20	10	2	15	16	17	19	23	Template reloc	1
2020	2	24	13	56	0.105003	38.0621	22.8736	8.66	0.3	2	2020-02-24-13-56-00	2020-03-09-07-53-04	10	3	15	16	17	19	23	Detection fixed reloc	0.765
2020	2	24	14	3	20.689	38.0704	22.9217	7.47	0.2	2	2020-02-24-14-03-20	2020-02-24-01-40-56	10	2	15	16	17	19	19	Detection fixed reloc	0.616
2020	2	24	15	43	18.549	38.0704	22.9217	7.47	0.1	2	2020-02-24-15-43-18	2020-02-24-01-40-56	10	2	15	16	17	19	19	Detection fixed reloc	0.678
2020	2	24	16	32	32.125	38.0621	22.8736	8.66	-0.2	2	2020-02-24-16-32-32	2020-03-09-07-53-04	10	3	15	16	17	19	23	Detection fixed reloc	0.701
2020	2	24	16	36	1.702	38.0299	22.8833	10.02	0.3	2	2020-02-24-16-36-01	2020-02-24-18-54-02	10	3	15	16	17	19	19	Detection fixed reloc	0.697
2020	2	24	17	3	2.109	38.0635	22.8732	6.93	0.4	2	2020-02-24-17-03-02	2020-02-24-13-55-20	10	2	15	16	17	19	23	Detection fixed reloc	0.602
2020	2	24	18	0	39.902	38.0644	22.8703	7.85	0.3	2	2020-02-24-18-00-39	2020-02-25-12-38-06	10	2	15	16	17	84	91	Detection fixed reloc	0.682
2020	2	24	18	30	11.005	38.0621	22.8736	8.66	-0.2	2	2020-02-24-18-30-11	2020-03-09-07-53-04	10	3	15	16	17	19	23	Detection fixed reloc	0.838
2020	2	24	18	54	30.132	38.0299	22.8833	10.02	1.4	1	2020-02-24-18-54-02	2020-02-24-18-54-02	10	3	15	16	17	19	19	Template reloc	1
2020	2	24	18	56	56.185	38.0621	22.8736	8.66	0	2	2020-02-24-18-56-56	2020-03-09-07-53-04	10	3	15	16	17	19	23	Detection fixed reloc	0.722
2020	2	24	18	59	16.209	38.0704	22.9217	7.47	-0.1	2	2020-02-24-18-59-16	2020-02-24-01-40-56	10	2	15	16	17	19	19	Detection fixed reloc	0.708
2020	2	24	19	30	2.229	38.0635	22.8732	6.93	0.5	2	2020-02-24-19-30-02	2020-02-24-13-55-20	10	2	15	16	17	19	23	Detection fixed reloc	0.609
2020	2	24	19	46	23.989	38.0635	22.8732	6.93	0.2	2	2020-02-24-19-46-23	2020-02-24-13-55-20	10	2	15	16	17	19	23	Detection fixed reloc	0.614
2020	2	24	19	48	2.365	38.0621	22.8736	8.66	0.1	2	2020-02-24-19-48-02	2020-03-09-07-53-04	10	3	15	16	17	19	23	Detection fixed reloc	0.718
2020	2	24	19	58	5.105	38.0621	22.8736	8.66	0	2	2020-02-24-19-58-05	2020-03-09-07-53-04	10	3	15	16	17	19	23	Detection fixed reloc	0.747
2020	2	24	20	8	2.442	38.0299	22.8833	10.02	0.2	2	2020-02-24-20-08-02	2020-02-24-18-54-02	10	3	15	16	17	19	19	Detection fixed reloc	0.926
2020	2	24	20	9	10.128	38.0762	22.8787	11.74	0.2	2	2020-02-24-20-09-10	2020-02-24-10-31-24	35	3	27	54	58	64	70	Detection fixed reloc	0.646
2020	2	24	20	19	3.402	38.0299	22.8833	10.02	0	2	2020-02-24-20-19-03	2020-02-24-18-54-02	10	3	15	16	17	19	19	Detection fixed reloc	0.846
2020	2	24	21	19	37.418	38.0682	22.8646	7.18	0.8	2	2020-02-24-21-19-37	2020-03-08-08-27-31	10	2	47	50	54	60	66	Detection fixed reloc	0.645
2020	2	24	21	21	3.588	38.0762	22.8787	11.74	0.9	2	2020-02-24-21-21-03	2020-02-24-10-31-24	35	3	27	54	58	64	70	Detection fixed reloc	0.711
2020	2	24	21	57	33.009	38.0635	22.8732	6.93	0.5	2	2020-02-24-21-57-33	2020-02-24-13-55-20	10	2	15	16	17	19	23	Detection fixed reloc	0.62
2020	2	24	22	2	19.146	38.0553	22.8729	9.65	0.6	2	2020-02-24-22-02-19	2020-02-26-10-09-35	10	3	15	16	17	19	19	Detection fixed reloc	0.608
2020	2	24	22	32	44.549	38.0635	22.8732	6.93	0.4	2	2020-02-24-22-32-44	2020-02-24-13-55-20	10	2	15	16	17	19	23	Detection fixed reloc	0.622
2020	2	24	22	44	51.949	38.0704	22.9217	7.47	0.1	2	2020-02-24-22-44-51	2020-02-24-01-40-56	10	2	15	16	17	19	19	Detection fixed reloc	0.614
2020	2	24	23	5	39.749	38.0635	22.8732	6.93	0.3	2	2020-02-24-23-05-39	2020-02-24-13-55-20	10	2	15	16	17	19	23	Detection fixed reloc	0.717
2020	2	24	23	25	47.829	38.0635	22.8732	6.93	0.6	2	2020-02-24-23-25-47	2020-02-24-13-55-20	10	2	15	16	17	19	23	Detection fixed reloc	0.639
2020	2	24	23	29	10.168	38.0762	22.8787	11.74	0.5	2	2020-02-24-23-29-10	2020-02-24-10-31-24	35	3	27	54	58	64	70	Detection fixed reloc	0.639
2020	2	24	23	31	43.822	38.0299	22.8833	10.02	0.3	2	2020-02-24-23-31-43	2020-02-24-18-54-02	10	3	15	16	17	19	19	Detection fixed reloc	0.775
2020	2	25	1	15	51.464	38.0714	22.8788	11.44	0.5	2	2020-02-25-01-15-51	2020-02-21-21-38-17	32	3	47	51	55	61	67	Detection fixed reloc	0.631
2020	2	25	2	57	33.878	38.0682	22.8646	7.18	0.8	2	2020-02-25-02-57-33	2020-03-08-08-27-31	10	2	47	50	54	60	66	Detection fixed reloc	0.764
2020	2	25	3	16	22.662	38.0299	22.8833	10.02	-0.2	2	2020-02-25-03-16-22	2020-02-24-18-54-02	10	3	15	16	17	19	19	Detection fixed reloc	0.812
2020	2	25	3	37	13.875	38.0794	22.9268	6.39	0.1	2	2020-02-25-03-37-13	2020-07-06-15-46-49	2	2	51	56	60	66	72	Detection fixed reloc	0.702
2020	2	25	3	54	1.835	38.0794	22.9268	6.39	0.1	2	2020-02-25-03-54-01	2020-07-06-15-46-49	2	2	51	56	60	66	72	Detection fixed reloc	0.667
2020	2	25	4	31	54.395	38.0794	22.9268	6.39	0.3	2	2020-02-25-04-31-54	2020-07-06-15-46-49	2	2	51	56	60	66	72	Detection fixed reloc	0.639
2020	2	25	4	49	57.595	38.0794	22.9268	6.39	0.2	2	2020-02-25-04-49-57	2020-07-06-15-46-49	2	2	51	56	60	66	72	Detection fixed reloc	0.693
2020	2	25	4	50	10.102	38.0299	22.8833	10.02	0.3	2	2020-02-25-04-50-10	2020-02-24-18-54-02	10	3	15	16	17	19	19	Detection fixed reloc	0.601
2020	2	25	5	9	11.009	38.0704	22.9217	7.47	1.1	2	2020-02-25-05-09-11	2020-02-24-01-40-56	10	2	15	16	17	19	19	Detection fixed reloc	0.801
2020	2	25	5	18	3.922	38.0644	22.8703	7.85	0	2	2020-02-25-05-18-03	2020-02-25-12-38-06	10	2	15	16	17	84	91	Detection fixed reloc	0.757
2020	2	25	5	19	47.215	38.0794	22.9268	6.39	0	2	2020-02-25-05-19-47	2020-07-06-15-46-49	2	2	51	56	60	66	72	Detection fixed reloc	0.732
2020	2	25	5	21	33.015	38.0794	22.9268	6.39	0	2	2020-02-25-05-21-33	2020-07-06-15-46-49	2	2	51	56	60	66	72	Detection fixed reloc	0.657
2020	2	25	6	25	13.729	38.0704	22.9217	7.47	0.3	2	2020-02-25-06-25-13	2020-02-24-01-40-56	10	2	15	16	17	19	19	Detection fixed reloc	0.666
2020	2	25	6	35	21.602	38.0644	22.8703	7.85	0.4	2	2020-02-25-06-35-21	2020-02-25-12-38-06	10	2	15	16	17	84	91	Detection fixed reloc	0.63
2020	2	25	7	7	38.885	38.0621	22.8736	8.66	0.1	2	2020-02-25-07-07-38	2020-03-09-07-53-04	10	3	15	16	17	19	23	Detection fixed reloc	0.627
2020	2	25	7	35	5.875	38.0794	22.9268	6.39	0.3	2	2020-02-25-07-35-05	2020-07-06-15-46-49	2	2	51	56	60	66	72	Detection fixed reloc	0.733
2020	2	25	8	8	18.285	38.0621	22.8736	8.66	0.1	2	2020-02-25-08-08-18	2020-03-09-07-53-04	10	3	15	16	17	19	23	Detection fixed reloc	0.639
2020	2	25	8	42	6.309	38.0635	22.8732	6.93	0.3	2	2020-02-25-08-42-06	2020-02-24-13-55-20	10	2	15	16	17	19	23	Detection fixed reloc	0.697
2020	2	25	8	54	28.645	38.0621	22.8736	8.66	0	2	2020-02-25-08-54-28	2020-03-09-07-53-04	10	3	15	16	17	19	23	Detection fixed reloc	0.742
2020	2	25	9	3	11.962	38.0299	22.8833	10.02	0.4	2	2020-02-25-09-03-11	2020-02-24-18-54-02	10	3	15	16	17	19	19	Detection fixed reloc	0.642
2020	2	25	9	9	36.582	38.0644	22.8703	7.85	-0.2	2	2020-02-25-09-09-36	2020-02-25-12-38-06	10	2	15	16	17	84	91	Detection fixed reloc	0.806
2020	2	25	10	4	13.902	38.0644	22.8703	7.85	0.2	2	2020-02-25-10-04-13	2020-02-25-12-38-06	10	2	15	16	17	84	91	Detection fixed reloc	0.733
2020	2	25	11	36	10.682	38.0299	22.8833	10.02	0.5	2	2020-02-25-11-36-10	2020-02-24-18-54-02	10	3	15	16	17	19	19	Detection fixed reloc	0.747
2020	2	25	11	54	15.204	38.0714	22.8788	11.44	0.8	2	2020-02-25-11-54-15	2020-02-21-21-38-17	32	3	47	51	55	61	67	Detection fixed reloc	0.693
2020	2	25	12	38	6.192	38.0644	22.8703	7.85	1.5	1	2020-02-25-12-38-06	2020-02-25-12-38-06	10	2	15	16	17	84	91	Template reloc	1
2020	2	25	13	48	27.002	38.0644	22.8703	7.85	0.5	2	2020-02-25-13-48-27	2020-02-25-12-38-06	10	2	15	16	17	84	91	Detection fixed reloc	0.722
2020	2	25	14	4	13.802	38.0644	22.8703	7.85	-0.1	2	2020-02-25-14-04-13	2020-02-25-12-38-06	10	2	15	16	17	84	91	Detection fixed reloc	0.853
2020	2	25	14	8	28.764	38.0714	22.8788	11.44	1	2	2020-02-25-14-08-28	2020-02-21-21-38-17	32	3	47	51	55	61	67	Detection fixed reloc	0.623
2020	2	25	14	29	4.035	38.0794	22.9268	6.39	-0.1	2	2020-02-25-14-29-04	2020-07-06-15-46-49	2	2	51	56	60	66	72	Detection fixed reloc	0.675
2020	2	25	14	40	32.615	38.0794	22.9268	6.39	0.1	2	2020-02-25-14-40-32	2020-07-06-15-46-49	2	2	51	56	60	66	72	Detection fixed reloc	0.716
2020	2	25	14	44	27.102	38.0644	22.8703	7.85	-0.1	2	2020-02-25-14-44-27	2020-02-25-12-38-06	10	2	15	16	17	84	91	Detection fixed reloc	0.831
2020	2	25	14	59	36.682	38.0644	22.8703	7.85	0.2	2	2020-02-25-14-59-36	2020-02-25-12-38-06	10	2	15	16	17	84	91	Detection fixed reloc	0.834
2020	2	25	15	40	12.922	38.0644	22.8703	7.85	0.2	2	2020-02-25-15-40-12	2020-02-25-12-38-06	10	2	15	16	17	84	91	Detection fixed reloc	0.727
2020	2	25	15	58	46.802	38.0644	22.8703	7.85	-0.1	2	2020-02-25-15-58-46	2020-02-25-12-38-06	10	2	15	16	17	84	91	Detection fixed reloc	0.746
2020	2	25	15	59	37.882	38.0299	22.8833	10.02	0.8	2	2020-02-25-15-59-37	2020-02-24-18-54-02	10	3	15	16	17	19	19	Detection fixed reloc	0.768
2020	2	25	16	17	30.582	38.0644	22.8703	7.85	0	2	2020-02-25-16-17-30	2020-02-25-12-38-06	10	2	15	16	17	84	91	Detection fixed reloc	0.717
2020	2	25	17	1	15.268	38.0762	22.8787	11.74	0.5	2	2020-02-25-17-01-15	2020-02-24-10-31-24	35	3	27	54	58	64	70	Detection fixed reloc	0.607
2020	2	25	17	22	0.982002	38.0644	22.8703	7.85	-0.2	2	2020-02-25-17-22-00	2020-02-25-12-38-06	10	2	15	16	17	84	91	Detection fixed reloc	0.728
2020	2	25	18	17	21.929	38.0635	22.8732	6.93	0.4	2	2020-02-25-18-17-21	2020-02-24-13-55-20	10	2	15	16	17	19	23	Detection fixed reloc	0.662
2020	2	25	18	18	25.682	38.0644	22.8703	7.85	0.4	2	2020-02-25-18-18-25	2020-02-25-12-38-06	10	2	15	16	17	84	91	Detection fixed reloc	0.837
2020	2	25	18	26	37.444	38.0714	22.8788	11.44	0.4	2	2020-02-25-18-26-37	2020-02-21-21-38-17	32	3	47	51	55	61	67	Detection fixed reloc	0.68
2020	2	25	18	52	44.805	38.0621	22.8736	8.66	-0.3	2	2020-02-25-18-52-44	2020-03-09-07-53-04	10	3	15	16	17	19	23	Detection fixed reloc	0.721
2020	2	25	19	56	47.844	38.0714	22.8788	11.44	0.6	2	2020-02-25-19-56-47	2020-02-21-21-38-17	32	3	47	51	55	61	67	Detection fixed reloc	0.697
2020	2	25	20	6	24.022	38.0299	22.8833	10.02	1.1	2	2020-02-25-20-06-24	2020-02-24-18-54-02	10	3	15	16	17	19	19	Detection fixed reloc	0.849
2020	2	25	21	28	33.082	38.0299	22.8833	10.02	0.1	2	2020-02-25-21-28-33	2020-02-24-18-54-02	10	3	15	16	17	19	19	Detection fixed reloc	0.728
2020	2	25	22	19	41.002	38.0644	22.8703	7.85	-0.1	2	2020-02-25-22-19-41	2020-02-25-12-38-06	10	2	15	16	17	84	91	Detection fixed reloc	0.69
2020	2	25	22	37	16.576	38.0525	22.9061	11.36	0	2	2020-02-25-22-37-16	2020-04-28-02-43-29	18	2	27	29	31	36	41	Detection fixed reloc	0.62
2020	2	25	23	10	14.544	38.0714	22.8788	11.44	0.3	2	2020-02-25-23-10-14	2020-02-21-21-38-17	32	3	47	51	55	61	67	Detection fixed reloc	0.649
2020	2	25	23	25	43.407	38.1841	22.6425	13.71	1.7	1	2020-02-25-23-25-44	2020-02-25-23-25-44	19	9	64	69	74	85	92	Template reloc	1
2020	2	26	0	40	0.625	38.0621	22.8736	8.66	0.3	2	2020-02-26-00-40-00	2020-03-09-07-53-04	10	3	15	16	17	19	23	Detection fixed reloc	0.676
2020	2	26	1	9	22.282	38.0644	22.8703	7.85	-0.1	2	2020-02-26-01-09-22	2020-02-25-12-38-06	10	2	15	16	17	84	91	Detection fixed reloc	0.636
2020	2	26	2	2	18.742	38.0644	22.8703	7.85	0.2	2	2020-02-26-02-02-18	2020-02-25-12-38-06	10	2	15	16	17	84	91	Detection fixed reloc	0.852
2020	2	26	2	9	40.908	38.0762	22.8787	11.74	0.3	2	2020-02-26-02-09-40	2020-02-24-10-31-24	35	3	27	54	58	64	70	Detection fixed reloc	0.684
2020	2	26	3	3	27.844	38.0714	22.8788	11.44	0.2	2	2020-02-26-03-03-27	2020-02-21-21-38-17	32	3	47	51	55	61	67	Detection fixed reloc	0.697
2020	2	26	3	4	43.006	38.0553	22.8729	9.65	0.2	2	2020-02-26-03-04-43	2020-02-26-10-09-35	10	3	15	16	17	19	19	Detection fixed reloc	0.627
2020	2	26	3	19	47.684	38.0714	22.8788	11.44	0.8	2	2020-02-26-03-19-47	2020-02-21-21-38-17	32	3	47	51	55	61	67	Detection fixed reloc	0.624
2020	2	26	3	29	16.509	38.0635	22.8732	6.93	0.3	2	2020-02-26-03-29-16	2020-02-24-13-55-20	10	2	15	16	17	19	23	Detection fixed reloc	0.652
2020	2	26	4	28	47.306	38.0553	22.8729	9.65	0.1	2	2020-02-26-04-28-47	2020-02-26-10-09-35	10	3	15	16	17	19	19	Detection fixed reloc	0.744
2020	2	26	5	58	26.838	38.0682	22.8646	7.18	0.4	2	2020-02-26-05-58-26	2020-03-08-08-27-31	10	2	47	50	54	60	66	Detection fixed reloc	0.702
2020	2	26	7	26	57.822	38.0644	22.8703	7.85	0.6	2	2020-02-26-07-26-57	2020-02-25-12-38-06	10	2	15	16	17	84	91	Detection fixed reloc	0.743
2020	2	26	7	42	1.644	38.0714	22.8788	11.44	0.1	2	2020-02-26-07-42-01	2020-02-21-21-38-17	32	3	47	51	55	61	67	Detection fixed reloc	0.799
2020	2	26	7	45	5.605	38.0621	22.8736	8.66	0.6	2	2020-02-26-07-45-05	2020-03-09-07-53-04	10	3	15	16	17	19	23	Detection fixed reloc	0.698
2020	2	26	9	42	43.296	38.0581	22.9433	7.82	-0.3	2	2020-02-26-09-42-43	2020-05-15-22-57-01	2	2	65	70	75	86	93	Detection fixed reloc	0.708
2020	2	26	10	9	35.146	38.0553	22.8729	9.65	1.8	1	2020-02-26-10-09-35	2020-02-26-10-09-35	10	3	15	16	17	19	19	Template reloc	1
2020	2	26	11	7	44.628	38.0762	22.8787	11.74	0.4	2	2020-02-26-11-07-44	2020-02-24-10-31-24	35	3	27	54	58	64	70	Detection fixed reloc	0.674
2020	2	26	11	27	21.262	38.0644	22.8703	7.85	0.5	2	2020-02-26-11-27-21	2020-02-25-12-38-06	10	2	15	16	17	84	91	Detection fixed reloc	0.623
2020	2	26	12	2	0.249001	38.0635	22.8732	6.93	0.5	2	2020-02-26-12-02-00	2020-02-24-13-55-20	10	2	15	16	17	19	23	Detection fixed reloc	0.738
2020	2	26	14	26	42.224	38.0714	22.8788	11.44	0.7	2	2020-02-26-14-26-42	2020-02-21-21-38-17	32	3	47	51	55	61	67	Detection fixed reloc	0.617
2020	2	26	16	44	35.662	38.0644	22.8703	7.85	0.1	2	2020-02-26-16-44-35	2020-02-25-12-38-06	10	2	15	16	17	84	91	Detection fixed reloc	0.613
2020	2	26	19	57	4.168	38.0762	22.8787	11.74	1	2	2020-02-26-19-57-04	2020-02-24-10-31-24	35	3	27	54	58	64	70	Detection fixed reloc	0.816
2020	2	26	22	2	18.804	38.0714	22.8788	11.44	0.4	2	2020-02-26-22-02-18	2020-02-21-21-38-17	32	3	47	51	55	61	67	Detection fixed reloc	0.722
2020	2	27	2	1	9.541	38.0146	22.6807	6.83	0.7	2	2020-02-27-02-01-09	2020-02-27-20-59-20	45	0	63	68	73	83	89	Detection fixed loc	0.637
2020	2	27	2	7	56.161	38.0146	22.6807	6.83	1	2	2020-02-27-02-07-56	2020-02-27-20-59-20	45	0	63	68	73	83	89	Detection fixed loc	0.625
2020	2	27	2	12	19.342	38.0644	22.8703	7.85	-0.2	2	2020-02-27-02-12-19	2020-02-25-12-38-06	10	2	15	16	17	84	91	Detection fixed reloc	0.751
2020	2	27	4	57	58.642	38.0299	22.8833	10.02	0.2	2	2020-02-27-04-57-58	2020-02-24-18-54-02	10	3	15	16	17	19	19	Detection fixed reloc	0.65
2020	2	27	5	8	18.501	38.0146	22.6807	6.83	0.4	2	2020-02-27-05-08-18	2020-02-27-20-59-20	45	0	63	68	73	83	89	Detection fixed loc	0.885
2020	2	27	5	20	46.005	38.0621	22.8736	8.66	0.6	2	2020-02-27-05-20-46	2020-03-09-07-53-04	10	3	15	16	17	19	23	Detection fixed reloc	0.616
2020	2	27	5	24	51.044	38.0714	22.8788	11.44	-0.1	2	2020-02-27-05-24-51	2020-02-21-21-38-17	32	3	47	51	55	61	67	Detection fixed reloc	0.658
2020	2	27	6	7	26.462	38.0644	22.8703	7.85	0	2	2020-02-27-06-07-26	2020-02-25-12-38-06	10	2	15	16	17	84	91	Detection fixed reloc	0.674
2020	2	27	20	59	20.581	38.0146	22.6807	6.83	1.4	1	2020-02-27-20-59-20	2020-02-27-20-59-20	45	0	63	68	73	83	89	Template loc	1
2020	2	27	21	1	29.781	38.0146	22.6807	6.83	0.4	2	2020-02-27-21-01-29	2020-02-27-20-59-20	45	0	63	68	73	83	89	Detection fixed loc	0.646
2020	2	27	21	38	17.641	38.0146	22.6807	6.83	0.4	2	2020-02-27-21-38-17	2020-02-27-20-59-20	45	0	63	68	73	83	89	Detection fixed loc	0.744
2020	2	27	21	38	47.321	38.0146	22.6807	6.83	0.7	2	2020-02-27-21-38-47	2020-02-27-20-59-20	45	0	63	68	73	83	89	Detection fixed loc	0.791
2020	2	27	22	31	44.161	38.0146	22.6807	6.83	0.5	2	2020-02-27-22-31-44	2020-02-27-20-59-20	45	0	63	68	73	83	89	Detection fixed loc	0.887
2020	2	27	23	15	24.103	38.2394	22.5925	11.86	1.5	2	2020-02-27-23-15-24	2020-02-28-02-22-03	46	10	66	71	76	87	94	Detection fixed reloc	0.819
2020	2	28	0	51	24.621	38.0146	22.6807	6.83	0.4	2	2020-02-28-00-51-24	2020-02-27-20-59-20	45	0	63	68	73	83	89	Detection fixed loc	0.652
2020	2	28	2	12	13.975	38.1923	22.6909	16.9	1.6	1	2020-02-28-02-12-14	2020-02-28-02-12-14	47	6	67	72	77	88	95	Template reloc	1
2020	2	28	2	22	4.093	38.2394	22.5925	11.86	1.6	1	2020-02-28-02-22-03	2020-02-28-02-22-03	46	10	66	71	76	87	94	Template reloc	1
2020	2	28	4	34	50.988	38.0762	22.8787	11.74	0.2	2	2020-02-28-04-34-50	2020-02-24-10-31-24	35	3	27	54	58	64	70	Detection fixed reloc	0.779
2020	2	28	5	11	36.025	38.1923	22.6909	16.9	0.5	2	2020-02-28-05-11-36	2020-02-28-02-12-14	47	6	67	72	77	88	95	Detection fixed reloc	0.733
2020	2	28	5	13	38.805	38.1923	22.6909	16.9	0.5	2	2020-02-28-05-13-38	2020-02-28-02-12-14	47	6	67	72	77	88	95	Detection fixed reloc	0.711
2020	2	28	8	9	34.405	38.1923	22.6909	16.9	0.8	2	2020-02-28-08-09-34	2020-02-28-02-12-14	47	6	67	72	77	88	95	Detection fixed reloc	0.957
2020	2	28	11	51	29.251	38.0483	22.9521	4.74	0.2	2	2020-02-28-11-51-29	2020-05-06-07-08-46	2	1	68	73	78	89	96	Detection fixed reloc	0.625
2020	2	28	12	47	15.461	38.0413	22.9271	5.83	0.2	2	2020-02-28-12-47-15	2020-05-19-07-37-09	15	1	21	22	23	27	28	Detection fixed reloc	0.639
2020	2	28	13	20	40.356	38.0525	22.9061	11.36	0.2	2	2020-02-28-13-20-40	2020-04-28-02-43-29	18	2	27	29	31	36	41	Detection fixed reloc	0.61
2020	2	28	16	10	15.585	38.1923	22.6909	16.9	0.7	2	2020-02-28-16-10-15	2020-02-28-02-12-14	47	6	67	72	77	88	95	Detection fixed reloc	0.657
2020	2	28	19	8	53.365	38.1923	22.6909	16.9	0.3	2	2020-02-28-19-08-53	2020-02-28-02-12-14	47	6	67	72	77	88	95	Detection fixed reloc	0.773
2020	2	28	21	14	12.583	38.2394	22.5925	11.86	1.4	2	2020-02-28-21-14-12	2020-02-28-02-22-03	46	10	66	71	76	87	94	Detection fixed reloc	0.846
2020	2	28	21	37	53.625	38.1923	22.6909	16.9	0.9	2	2020-02-28-21-37-53	2020-02-28-02-12-14	47	6	67	72	77	88	95	Detection fixed reloc	0.903
2020	2	28	22	58	43.003	38.2394	22.5925	11.86	1.5	2	2020-02-28-22-58-43	2020-02-28-02-22-03	46	10	66	71	76	87	94	Detection fixed reloc	0.779
2020	2	28	23	28	18.065	38.1923	22.6909	16.9	1.2	2	2020-02-28-23-28-18	2020-02-28-02-12-14	47	6	67	72	77	88	95	Detection fixed reloc	0.834
2020	2	28	23	45	17.145	38.1923	22.6909	16.9	0.7	2	2020-02-28-23-45-17	2020-02-28-02-12-14	47	6	67	72	77	88	95	Detection fixed reloc	0.856
2020	2	29	1	37	20.487	38.0723	22.9323	8.1	0.1	2	2020-02-29-01-37-20	2020-05-24-02-51-46	2	2	52	57	61	67	73	Detection fixed reloc	0.64
2020	2	29	1	47	9.205	38.1923	22.6909	16.9	0.7	2	2020-02-29-01-47-09	2020-02-28-02-12-14	47	6	67	72	77	88	95	Detection fixed reloc	0.725
2020	2	29	3	31	25.685	38.1923	22.6909	16.9	0.5	2	2020-02-29-03-31-25	2020-02-28-02-12-14	47	6	67	72	77	88	95	Detection fixed reloc	0.824
2020	2	29	10	48	26.559	38.0595	22.9346	7.16	0.3	2	2020-02-29-10-48-26	2020-07-08-12-31-35	2	2	24	26	28	32	36	Detection fixed reloc	0.679
2020	2	29	12	7	56.636	38.1017	22.8923	12.31	0.4	2	2020-02-29-12-07-56	2020-03-06-02-29-41	48	2	69	74	79	90	97	Detection fixed reloc	0.632
2020	2	29	14	26	36.629	38.0635	22.8732	6.93	1.1	2	2020-02-29-14-26-36	2020-02-24-13-55-20	10	2	15	16	17	19	23	Detection fixed reloc	0.607
2020	2	29	14	42	45.929	38.0635	22.8732	6.93	0.3	2	2020-02-29-14-42-45	2020-02-24-13-55-20	10	2	15	16	17	19	23	Detection fixed reloc	0.723
2020	2	29	14	44	39.562	38.0644	22.8703	7.85	0.2	2	2020-02-29-14-44-39	2020-02-25-12-38-06	10	2	15	16	17	84	91	Detection fixed reloc	0.606
2020	2	29	14	45	18.429	38.0635	22.8732	6.93	0.5	2	2020-02-29-14-45-18	2020-02-24-13-55-20	10	2	15	16	17	19	23	Detection fixed reloc	0.637
2020	2	29	17	39	14.64	38.1876	22.7203	11.26	0.3	2	2020-02-29-17-39-14	2020-01-17-15-51-20	1	6	10	10	10	12	12	Detection fixed reloc	0.75
2020	2	29	18	31	18.598	38.0682	22.8646	7.18	0.5	2	2020-02-29-18-31-18	2020-03-08-08-27-31	10	2	47	50	54	60	66	Detection fixed reloc	0.626
2020	2	29	19	1	3.619	38.0595	22.9346	7.16	0	2	2020-02-29-19-01-03	2020-07-08-12-31-35	2	2	24	26	28	32	36	Detection fixed reloc	0.673
2020	2	29	19	49	22.007	38.1858	22.7529	15.98	0.9	2	2020-02-29-19-49-22	2020-01-18-01-37-23	1	6	1	1	27	31	35	Detection fixed reloc	0.628
2020	2	29	20	36	49.1	38.1876	22.7203	11.26	0.4	2	2020-02-29-20-36-49	2020-01-17-15-51-20	1	6	10	10	10	12	12	Detection fixed reloc	0.639
2020	2	29	20	58	29.925	38.1923	22.6909	16.9	0.3	2	2020-02-29-20-58-29	2020-02-28-02-12-14	47	6	67	72	77	88	95	Detection fixed reloc	0.679
2020	2	29	21	54	58.085	38.1923	22.6909	16.9	0.4	2	2020-02-29-21-54-58	2020-02-28-02-12-14	47	6	67	72	77	88	95	Detection fixed reloc	0.888
2020	2	29	21	56	59.685	38.1923	22.6909	16.9	0.4	2	2020-02-29-21-56-59	2020-02-28-02-12-14	47	6	67	72	77	88	95	Detection fixed reloc	0.671
2020	2	29	22	6	53.665	38.1923	22.6909	16.9	0.2	2	2020-02-29-22-06-53	2020-02-28-02-12-14	47	6	67	72	77	88	95	Detection fixed reloc	0.944
2020	2	29	22	40	56.778	38.0682	22.8646	7.18	0.3	2	2020-02-29-22-40-56	2020-03-08-08-27-31	10	2	47	50	54	60	66	Detection fixed reloc	0.602
2020	2	29	22	49	32.072	38.0698	22.9292	7.74	0.2	2	2020-02-29-22-49-32	2020-05-21-17-47-41	2	2	52	57	61	67	73	Detection fixed reloc	0.613
2020	3	1	0	11	14.868	38.1919	22.7393	5.71	0.4	2	2020-03-01-00-11-14	2020-02-20-06-08-36	1	6	9	9	9	70	76	Detection fixed reloc	0.739
2020	3	1	0	58	0.542	38.0644	22.8703	7.85	0.7	2	2020-03-01-00-58-00	2020-02-25-12-38-06	10	2	15	16	17	84	91	Detection fixed reloc	0.642
2020	3	1	1	25	38.1	38.1876	22.7203	11.26	0.3	2	2020-03-01-01-25-38	2020-01-17-15-51-20	1	6	10	10	10	12	12	Detection fixed reloc	0.82
2020	3	1	1	58	20.198	38.0682	22.8646	7.18	0.1	2	2020-03-01-01-58-20	2020-03-08-08-27-31	10	2	47	50	54	60	66	Detection fixed reloc	0.654
2020	3	1	4	25	58.78	38.1876	22.7203	11.26	0.2	2	2020-03-01-04-25-58	2020-01-17-15-51-20	1	6	10	10	10	12	12	Detection fixed reloc	0.924
2020	3	1	5	47	2.484	38.0714	22.8788	11.44	0.3	2	2020-03-01-05-47-02	2020-02-21-21-38-17	32	3	47	51	55	61	67	Detection fixed reloc	0.656
2020	3	1	5	50	6.069	38.0734	22.9095	5.35	-0.3	2	2020-03-01-05-50-06	2020-05-23-02-13-42	2	2	70	75	80	91	98	Detection fixed reloc	0.658
2020	3	1	5	55	15.009	38.0734	22.9095	5.35	0	2	2020-03-01-05-55-15	2020-05-23-02-13-42	2	2	70	75	80	91	98	Detection fixed reloc	0.671
2020	3	1	6	42	51.176	38.1017	22.8923	12.31	0.4	2	2020-03-01-06-42-51	2020-03-06-02-29-41	48	2	69	74	79	90	97	Detection fixed reloc	0.61
2020	3	1	8	46	21.12	38.1876	22.7203	11.26	0.5	2	2020-03-01-08-46-21	2020-01-17-15-51-20	1	6	10	10	10	12	12	Detection fixed reloc	0.715
2020	3	1	9	0	18.649	38.0632	22.9297	7.05	-0.2	2	2020-03-01-09-00-18	2020-05-15-15-41-15	2	2	24	26	28	32	36	Detection fixed reloc	0.606
2020	3	1	11	57	22.364	38.0714	22.8788	11.44	0.2	2	2020-03-01-11-57-22	2020-02-21-21-38-17	32	3	47	51	55	61	67	Detection fixed reloc	0.641
2020	3	1	13	44	4.584	38.0714	22.8788	11.44	0.3	2	2020-03-01-13-44-04	2020-02-21-21-38-17	32	3	47	51	55	61	67	Detection fixed reloc	0.636
2020	3	1	15	7	57.328	38.0762	22.8787	11.74	0.3	2	2020-03-01-15-07-57	2020-02-24-10-31-24	35	3	27	54	58	64	70	Detection fixed reloc	0.611
2020	3	1	19	34	20.379	38.17	22.6523	14.44	1.7	1	2020-03-01-19-34-20	2020-03-01-19-34-20	49	9	71	76	81	92	99	Template reloc	1
2020	3	1	20	5	9.748	38.0762	22.8787	11.74	0	2	2020-03-01-20-05-09	2020-02-24-10-31-24	35	3	27	54	58	64	70	Detection fixed reloc	0.679
2020	3	1	20	10	41.356	38.1017	22.8923	12.31	-0.3	2	2020-03-01-20-10-41	2020-03-06-02-29-41	48	2	69	74	79	90	97	Detection fixed reloc	0.798
2020	3	1	22	48	28.804	38.1493	22.6745	4.71	0.3	2	2020-03-01-22-48-28	2020-03-08-00-38-58	50	8	72	77	82	93	100	Detection fixed reloc	0.815
2020	3	1	23	30	27.149	38.0635	22.8732	6.93	1.1	2	2020-03-01-23-30-27	2020-02-24-13-55-20	10	2	15	16	17	19	23	Detection fixed reloc	0.673
2020	3	2	0	19	34.719	38.1412	22.6765	11.54	0.7	2	2020-03-02-00-19-34	2020-03-08-00-41-09	50	8	72	77	82	94	101	Detection fixed reloc	0.673
2020	3	2	2	31	51.825	38.1923	22.6909	16.9	0.2	2	2020-03-02-02-31-51	2020-02-28-02-12-14	47	6	67	72	77	88	95	Detection fixed reloc	0.643
2020	3	2	4	38	13.716	38.1017	22.8923	12.31	0.1	2	2020-03-02-04-38-13	2020-03-06-02-29-41	48	2	69	74	79	90	97	Detection fixed reloc	0.964
2020	3	2	6	2	41.423	38.2394	22.5925	11.86	1.4	2	2020-03-02-06-02-41	2020-02-28-02-22-03	46	10	66	71	76	87	94	Detection fixed reloc	0.857
2020	3	2	7	48	10.545	38.1923	22.6909	16.9	1	2	2020-03-02-07-48-10	2020-02-28-02-12-14	47	6	67	72	77	88	95	Detection fixed reloc	0.635
2020	3	2	8	47	0.285004	38.1923	22.6909	16.9	1.1	2	2020-03-02-08-47-00	2020-02-28-02-12-14	47	6	67	72	77	88	95	Detection fixed reloc	0.635
2020	3	2	8	52	46.211	38.0567	22.8827	13.13	0	2	2020-03-02-08-52-46	2020-07-22-19-28-57	4	3	8	8	8	8	8	Detection fixed reloc	0.663
2020	3	2	10	20	40.909	38.0635	22.8732	6.93	0.9	2	2020-03-02-10-20-40	2020-02-24-13-55-20	10	2	15	16	17	19	23	Detection fixed reloc	0.615
2020	3	2	10	21	10.652	38.1797	22.6967	21.07	1.2	2	2020-03-02-10-21-10	2020-03-02-16-19-48	47	6	67	72	77	88	102	Detection fixed reloc	0.645
2020	3	2	11	8	25.762	38.0644	22.8703	7.85	-0.1	2	2020-03-02-11-08-25	2020-02-25-12-38-06	10	2	15	16	17	84	91	Detection fixed reloc	0.755
2020	3	2	11	37	33.021	38.0755	22.9239	5.97	-0.1	2	2020-03-02-11-37-33	2020-05-24-20-08-36	2	2	70	75	80	95	103	Detection fixed reloc	0.679
2020	3	2	12	9	58.629	38.0734	22.9095	5.35	-0.1	2	2020-03-02-12-09-58	2020-05-23-02-13-42	2	2	70	75	80	91	98	Detection fixed reloc	0.703
2020	3	2	12	32	33.492	38.1797	22.6967	21.07	1	2	2020-03-02-12-32-33	2020-03-02-16-19-48	47	6	67	72	77	88	102	Detection fixed reloc	0.71
2020	3	2	12	40	45.469	38.0734	22.9095	5.35	0.3	2	2020-03-02-12-40-45	2020-05-23-02-13-42	2	2	70	75	80	91	98	Detection fixed reloc	0.665
2020	3	2	12	44	4.845	38.1923	22.6909	16.9	0.8	2	2020-03-02-12-44-04	2020-02-28-02-12-14	47	6	67	72	77	88	95	Detection fixed reloc	0.606
2020	3	2	12	48	7.132	38.1797	22.6967	21.07	0.7	2	2020-03-02-12-48-07	2020-03-02-16-19-48	47	6	67	72	77	88	102	Detection fixed reloc	0.887
2020	3	2	12	57	26.212	38.1797	22.6967	21.07	0.9	2	2020-03-02-12-57-26	2020-03-02-16-19-48	47	6	67	72	77	88	102	Detection fixed reloc	0.95
2020	3	2	12	58	5.212	38.1797	22.6967	21.07	0.6	2	2020-03-02-12-58-05	2020-03-02-16-19-48	47	6	67	72	77	88	102	Detection fixed reloc	0.751
2020	3	2	14	2	12.912	38.1797	22.6967	21.07	0.6	2	2020-03-02-14-02-12	2020-03-02-16-19-48	47	6	67	72	77	88	102	Detection fixed reloc	0.663
2020	3	2	16	19	48.582	38.1797	22.6967	21.07	1.6	1	2020-03-02-16-19-48	2020-03-02-16-19-48	47	6	67	72	77	88	102	Template reloc	1
2020	3	2	16	40	41.732	38.1797	22.6967	21.07	0.5	2	2020-03-02-16-40-41	2020-03-02-16-19-48	47	6	67	72	77	88	102	Detection fixed reloc	0.727
2020	3	2	17	19	25.685	38.1923	22.6909	16.9	0.6	2	2020-03-02-17-19-25	2020-02-28-02-12-14	47	6	67	72	77	88	95	Detection fixed reloc	0.696
2020	3	2	17	22	48.505	38.1923	22.6909	16.9	0.4	2	2020-03-02-17-22-48	2020-02-28-02-12-14	47	6	67	72	77	88	95	Detection fixed reloc	0.638
2020	3	2	17	41	43.872	38.1797	22.6967	21.07	0.9	2	2020-03-02-17-41-43	2020-03-02-16-19-48	47	6	67	72	77	88	102	Detection fixed reloc	0.661
2020	3	2	19	14	36.129	38.0734	22.9095	5.35	-0.4	2	2020-03-02-19-14-36	2020-05-23-02-13-42	2	2	70	75	80	91	98	Detection fixed reloc	0.763
2020	3	2	20	34	2.071	38.1742	22.4627	15.89	1.4	1	2020-03-02-20-34-02	2020-03-02-20-34-02	51	10	73	78	83	96	104	Template reloc	1
2020	3	2	20	47	46.42	38.2167	22.6591	11.22	0.8	2	2020-03-02-20-47-46	2020-11-19-15-41-55	44	6	62	67	72	82	88	Detection fixed reloc	0.614
2020	3	2	21	6	14.381	38.1816	22.7122	8.2	0.6	2	2020-03-02-21-06-14	2020-01-26-00-16-27	1	6	1	1	1	1	30	Detection fixed reloc	0.645
2020	3	2	22	42	24.648	38.0762	22.8787	11.74	0.1	2	2020-03-02-22-42-24	2020-02-24-10-31-24	35	3	27	54	58	64	70	Detection fixed reloc	0.63
2020	3	2	22	47	0.0019989	38.0644	22.8703	7.85	0.1	2	2020-03-02-22-47-00	2020-02-25-12-38-06	10	2	15	16	17	84	91	Detection fixed reloc	0.647
2020	3	3	0	4	26.028	38.0762	22.8787	11.74	0	2	2020-03-03-00-04-26	2020-02-24-10-31-24	35	3	27	54	58	64	70	Detection fixed reloc	0.688
2020	3	3	1	21	52.449	38.0734	22.9095	5.35	-0.3	2	2020-03-03-01-21-52	2020-05-23-02-13-42	2	2	70	75	80	91	98	Detection fixed reloc	0.627
2020	3	3	1	48	40.648	38.0762	22.8787	11.74	-0.2	2	2020-03-03-01-48-40	2020-02-24-10-31-24	35	3	27	54	58	64	70	Detection fixed reloc	0.773
2020	3	3	2	29	58.516	38.1017	22.8923	12.31	-0.2	2	2020-03-03-02-29-58	2020-03-06-02-29-41	48	2	69	74	79	90	97	Detection fixed reloc	0.663
2020	3	3	3	44	37.985	38.1923	22.6909	16.9	0.2	2	2020-03-03-03-44-37	2020-02-28-02-12-14	47	6	67	72	77	88	95	Detection fixed reloc	0.615
2020	3	3	4	22	33.141	38.0755	22.9239	5.97	0.3	2	2020-03-03-04-22-33	2020-05-24-20-08-36	2	2	70	75	80	95	103	Detection fixed reloc	0.786
2020	3	3	5	52	58.788	38.0762	22.8787	11.74	0.1	2	2020-03-03-05-52-58	2020-02-24-10-31-24	35	3	27	54	58	64	70	Detection fixed reloc	0.752
2020	3	3	6	0	22.541	38.0755	22.9239	5.97	0.2	2	2020-03-03-06-00-22	2020-05-24-20-08-36	2	2	70	75	80	95	103	Detection fixed reloc	0.724
2020	3	3	10	0	25.767	38.0786	22.8589	9.08	0.2	2	2020-03-03-10-00-25	2020-02-12-21-32-14	9	3	14	15	16	18	18	Detection fixed reloc	0.778
2020	3	3	10	1	12.588	38.0762	22.8787	11.74	0	2	2020-03-03-10-01-12	2020-02-24-10-31-24	35	3	27	54	58	64	70	Detection fixed reloc	0.744
2020	3	3	10	27	26.267	38.1185	22.7593	12.61	1.3	2	2020-03-03-10-27-26	2021-04-13-00-28-30	52	4	74	79	84	97	105	Detection fixed reloc	0.602
2020	3	3	12	33	9.928	38.0762	22.8787	11.74	0.3	2	2020-03-03-12-33-09	2020-02-24-10-31-24	35	3	27	54	58	64	70	Detection fixed reloc	0.642
2020	3	3	15	52	56.769	38.0704	22.9217	7.47	-0.1	2	2020-03-03-15-52-56	2020-02-24-01-40-56	10	2	15	16	17	19	19	Detection fixed reloc	0.925
2020	3	3	16	49	11.349	38.0704	22.9217	7.47	-0.2	2	2020-03-03-16-49-11	2020-02-24-01-40-56	10	2	15	16	17	19	19	Detection fixed reloc	0.785
2020	3	3	18	37	49.488	38.0762	22.8787	11.74	0.8	2	2020-03-03-18-37-49	2020-02-24-10-31-24	35	3	27	54	58	64	70	Detection fixed reloc	0.696
2020	3	3	19	9	56.022	38.0299	22.8833	10.02	0.2	2	2020-03-03-19-09-56	2020-02-24-18-54-02	10	3	15	16	17	19	19	Detection fixed reloc	0.762
2020	3	4	3	46	6.789	38.0734	22.9095	5.35	0.3	2	2020-03-04-03-46-06	2020-05-23-02-13-42	2	2	70	75	80	91	98	Detection fixed reloc	0.694
2020	3	4	5	21	28.789	38.0734	22.9095	5.35	0.3	2	2020-03-04-05-21-28	2020-05-23-02-13-42	2	2	70	75	80	91	98	Detection fixed reloc	0.697
2020	3	4	5	40	54.241	38.0755	22.9239	5.97	-0.3	2	2020-03-04-05-40-54	2020-05-24-20-08-36	2	2	70	75	80	95	103	Detection fixed reloc	0.682
2020	3	4	5	57	39.976	38.1017	22.8923	12.31	-0.1	2	2020-03-04-05-57-39	2020-03-06-02-29-41	48	2	69	74	79	90	97	Detection fixed reloc	0.817
2020	3	4	7	1	15.689	38.0734	22.9095	5.35	0.1	2	2020-03-04-07-01-15	2020-05-23-02-13-42	2	2	70	75	80	91	98	Detection fixed reloc	0.745
2020	3	4	7	32	51.016	38.1017	22.8923	12.31	-0.1	2	2020-03-04-07-32-51	2020-03-06-02-29-41	48	2	69	74	79	90	97	Detection fixed reloc	0.818
2020	3	4	10	4	43.156	38.1017	22.8923	12.31	-0.3	2	2020-03-04-10-04-43	2020-03-06-02-29-41	48	2	69	74	79	90	97	Detection fixed reloc	0.881
2020	3	4	11	16	44.029	38.0734	22.9095	5.35	0.2	2	2020-03-04-11-16-44	2020-05-23-02-13-42	2	2	70	75	80	91	98	Detection fixed reloc	0.733
2020	3	4	11	22	20.949	38.0734	22.9095	5.35	-0.1	2	2020-03-04-11-22-20	2020-05-23-02-13-42	2	2	70	75	80	91	98	Detection fixed reloc	0.734
2020	3	4	11	50	57.869	38.0635	22.8732	6.93	0.4	2	2020-03-04-11-50-57	2020-02-24-13-55-20	10	2	15	16	17	19	23	Detection fixed reloc	0.642
2020	3	4	13	10	12.876	38.1017	22.8923	12.31	0	2	2020-03-04-13-10-12	2020-03-06-02-29-41	48	2	69	74	79	90	97	Detection fixed reloc	0.873
2020	3	4	13	39	19.476	38.1017	22.8923	12.31	-0.1	2	2020-03-04-13-39-19	2020-03-06-02-29-41	48	2	69	74	79	90	97	Detection fixed reloc	0.759
2020	3	4	15	10	26.436	38.1017	22.8923	12.31	-0.2	2	2020-03-04-15-10-26	2020-03-06-02-29-41	48	2	69	74	79	90	97	Detection fixed reloc	0.711
2020	3	4	15	16	28.936	38.1017	22.8923	12.31	-0.1	2	2020-03-04-15-16-28	2020-03-06-02-29-41	48	2	69	74	79	90	97	Detection fixed reloc	0.706
2020	3	4	17	38	43.749	38.0734	22.9095	5.35	0	2	2020-03-04-17-38-43	2020-05-23-02-13-42	2	2	70	75	80	91	98	Detection fixed reloc	0.652
2020	3	4	21	0	55.009	38.0734	22.9095	5.35	0	2	2020-03-04-21-00-55	2020-05-23-02-13-42	2	2	70	75	80	91	98	Detection fixed reloc	0.642
2020	3	4	23	5	25.849	38.0734	22.9095	5.35	-0.2	2	2020-03-04-23-05-25	2020-05-23-02-13-42	2	2	70	75	80	91	98	Detection fixed reloc	0.717
2020	3	4	23	35	50.829	38.0734	22.9095	5.35	0.1	2	2020-03-04-23-35-50	2020-05-23-02-13-42	2	2	70	75	80	91	98	Detection fixed reloc	0.789
2020	3	4	23	41	41.072	38.0698	22.9292	7.74	0.2	2	2020-03-04-23-41-41	2020-05-21-17-47-41	2	2	52	57	61	67	73	Detection fixed reloc	0.616
2020	3	5	1	44	28.161	38.0755	22.9239	5.97	-0.1	2	2020-03-05-01-44-28	2020-05-24-20-08-36	2	2	70	75	80	95	103	Detection fixed reloc	0.652
2020	3	5	4	28	15.961	38.0755	22.9239	5.97	-0.1	2	2020-03-05-04-28-15	2020-05-24-20-08-36	2	2	70	75	80	95	103	Detection fixed reloc	0.608
2020	3	5	5	34	28.449	38.0632	22.9297	7.05	-0.3	2	2020-03-05-05-34-28	2020-05-15-15-41-15	2	2	24	26	28	32	36	Detection fixed reloc	0.734
2020	3	5	6	25	14.518	38.062	22.9393	7.02	-0.1	2	2020-03-05-06-25-14	2020-05-11-14-30-34	2	2	51	56	85	98	106	Detection fixed reloc	0.725
2020	3	5	6	49	25.639	38.0595	22.9346	7.16	0.2	2	2020-03-05-06-49-25	2020-07-08-12-31-35	2	2	24	26	28	32	36	Detection fixed reloc	0.717
2020	3	5	13	3	35.681	38.0755	22.9239	5.97	-0.2	2	2020-03-05-13-03-35	2020-05-24-20-08-36	2	2	70	75	80	95	103	Detection fixed reloc	0.842
2020	3	5	14	26	17.356	38.1017	22.8923	12.31	0	2	2020-03-05-14-26-17	2020-03-06-02-29-41	48	2	69	74	79	90	97	Detection fixed reloc	0.863
2020	3	5	15	5	37.681	38.0755	22.9239	5.97	-0.2	2	2020-03-05-15-05-37	2020-05-24-20-08-36	2	2	70	75	80	95	103	Detection fixed reloc	0.705
2020	3	5	15	44	16.677	38.1393	23.0396	39.42	1.5	1	2020-03-05-15-44-17	2020-03-05-15-44-17	53	0	75	80	86	99	107	Template loc	1
2020	3	5	16	46	37.576	38.1017	22.8923	12.31	-0.3	2	2020-03-05-16-46-37	2020-03-06-02-29-41	48	2	69	74	79	90	97	Detection fixed reloc	0.735
2020	3	5	17	10	9.801	38.0755	22.9239	5.97	-0.1	2	2020-03-05-17-10-09	2020-05-24-20-08-36	2	2	70	75	80	95	103	Detection fixed reloc	0.869
2020	3	5	18	37	6.149	38.0734	22.9095	5.35	-0.3	2	2020-03-05-18-37-06	2020-05-23-02-13-42	2	2	70	75	80	91	98	Detection fixed reloc	0.756
2020	3	5	20	31	17.64	38.0405	22.8332	12.87	0.3	2	2020-03-05-20-31-17	2020-03-05-21-01-37	54	5	76	81	87	100	108	Detection fixed reloc	0.829
2020	3	5	21	1	37.14	38.0405	22.8332	12.87	1.6	1	2020-03-05-21-01-37	2020-03-05-21-01-37	54	5	76	81	87	100	108	Template reloc	1
2020	3	5	23	47	6.229	38.0667	22.7646	9.78	1.1	1	2020-03-05-23-46-46	2020-03-05-23-46-46	55	4	77	82	88	101	109	Template reloc	1
2020	3	6	0	4	44.496	38.1017	22.8923	12.31	0.4	2	2020-03-06-00-04-44	2020-03-06-02-29-41	48	2	69	74	79	90	97	Detection fixed reloc	0.642
2020	3	6	0	33	15.381	38.0755	22.9239	5.97	-0.1	2	2020-03-06-00-33-15	2020-05-24-20-08-36	2	2	70	75	80	95	103	Detection fixed reloc	0.773
2020	3	6	1	52	4.882	38.0299	22.8833	10.02	0.2	2	2020-03-06-01-52-04	2020-02-24-18-54-02	10	3	15	16	17	19	19	Detection fixed reloc	0.618
2020	3	6	2	29	40.756	38.1017	22.8923	12.31	1.6	1	2020-03-06-02-29-41	2020-03-06-02-29-41	48	2	69	74	79	90	97	Template reloc	1
2020	3	6	2	36	49.176	38.1017	22.8923	12.31	0.2	2	2020-03-06-02-36-49	2020-03-06-02-29-41	48	2	69	74	79	90	97	Detection fixed reloc	0.842
2020	3	6	2	50	46.656	38.1017	22.8923	12.31	-0.1	2	2020-03-06-02-50-46	2020-03-06-02-29-41	48	2	69	74	79	90	97	Detection fixed reloc	0.633
2020	3	6	4	50	53.616	38.1017	22.8923	12.31	0.1	2	2020-03-06-04-50-53	2020-03-06-02-29-41	48	2	69	74	79	90	97	Detection fixed reloc	0.743
2020	3	6	4	52	56.996	38.1017	22.8923	12.31	0.4	2	2020-03-06-04-52-56	2020-03-06-02-29-41	48	2	69	74	79	90	97	Detection fixed reloc	0.61
2020	3	6	5	19	53.356	38.1017	22.8923	12.31	0.1	2	2020-03-06-05-19-53	2020-03-06-02-29-41	48	2	69	74	79	90	97	Detection fixed reloc	0.891
2020	3	6	5	22	26.916	38.1017	22.8923	12.31	-0.2	2	2020-03-06-05-22-26	2020-03-06-02-29-41	48	2	69	74	79	90	97	Detection fixed reloc	0.871
2020	3	6	8	4	18.019	38.0667	22.7646	9.78	0.4	2	2020-03-06-08-04-18	2020-03-05-23-46-46	55	4	77	82	88	101	109	Detection fixed reloc	0.612
2020	3	6	8	35	22.301	38.0755	22.9239	5.97	0.2	2	2020-03-06-08-35-22	2020-05-24-20-08-36	2	2	70	75	80	95	103	Detection fixed reloc	0.787
2020	3	6	9	45	48.144	38.1493	22.6745	4.71	0.3	2	2020-03-06-09-45-48	2020-03-08-00-38-58	50	8	72	77	82	93	100	Detection fixed reloc	0.686
2020	3	6	12	20	49.189	38.0734	22.9095	5.35	0.2	2	2020-03-06-12-20-49	2020-05-23-02-13-42	2	2	70	75	80	91	98	Detection fixed reloc	0.686
2020	3	6	13	56	48.277	38.2511	22.6986	4.54	1	2	2020-03-06-13-56-48	2020-03-30-07-07-04	56	7	78	83	89	102	110	Detection fixed reloc	0.644
2020	3	6	14	5	39.175	38.1762	22.7051	6.16	1.3	2	2020-03-06-14-05-39	2020-09-07-02-50-31	57	6	79	84	90	103	111	Detection fixed reloc	0.769
2020	3	6	15	55	15.621	38.0755	22.9239	5.97	0.5	2	2020-03-06-15-55-15	2020-05-24-20-08-36	2	2	70	75	80	95	103	Detection fixed reloc	0.712
2020	3	6	17	48	13.916	38.1017	22.8923	12.31	0.1	2	2020-03-06-17-48-13	2020-03-06-02-29-41	48	2	69	74	79	90	97	Detection fixed reloc	0.715
2020	3	6	18	34	11.841	38.0755	22.9239	5.97	0	2	2020-03-06-18-34-11	2020-05-24-20-08-36	2	2	70	75	80	95	103	Detection fixed reloc	0.687
2020	3	6	21	35	9.785	38.0628	22.8281	11.67	0.5	2	2020-03-06-21-35-09	2020-04-27-00-02-17	54	3	76	81	87	104	112	Detection fixed reloc	0.695
2020	3	6	22	14	30.996	38.1017	22.8923	12.31	0.4	2	2020-03-06-22-14-30	2020-03-06-02-29-41	48	2	69	74	79	90	97	Detection fixed reloc	0.601
2020	3	7	1	45	24.556	38.1017	22.8923	12.31	0.2	2	2020-03-07-01-45-24	2020-03-06-02-29-41	48	2	69	74	79	90	97	Detection fixed reloc	0.641
2020	3	7	2	39	37.908	38.0762	22.8787	11.74	0.8	2	2020-03-07-02-39-37	2020-02-24-10-31-24	35	3	27	54	58	64	70	Detection fixed reloc	0.658
2020	3	7	4	40	34.881	38.0755	22.9239	5.97	0.2	2	2020-03-07-04-40-34	2020-05-24-20-08-36	2	2	70	75	80	95	103	Detection fixed reloc	0.602
2020	3	7	8	20	11.57	38.1494	22.9741	6.16	3.9	1	2020-03-07-08-20-11	2020-03-07-08-20-11	2	2	80	85	91	105	113	Template reloc	1
2020	3	7	8	30	7.061	38.1472	22.9618	13.11	-0.2	2	2020-03-07-08-30-07	2020-03-07-12-55-08	2	2	80	85	92	106	114	Detection fixed reloc	0.947
2020	3	7	8	45	15.681	38.1472	22.9618	13.11	0.9	2	2020-03-07-08-45-15	2020-03-07-12-55-08	2	2	80	85	92	106	114	Detection fixed reloc	0.605
2020	3	7	9	5	33.561	38.1472	22.9618	13.11	0.2	2	2020-03-07-09-05-33	2020-03-07-12-55-08	2	2	80	85	92	106	114	Detection fixed reloc	0.811
2020	3	7	10	28	15.081	38.1472	22.9618	13.11	0.9	2	2020-03-07-10-28-15	2020-03-07-12-55-08	2	2	80	85	92	106	114	Detection fixed reloc	0.615
2020	3	7	12	55	7.57	38.1472	22.9618	13.11	2.1	1	2020-03-07-12-55-08	2020-03-07-12-55-08	2	2	80	85	92	106	114	Template reloc	1
2020	3	7	12	58	13.501	38.1472	22.9618	13.11	0.5	2	2020-03-07-12-58-13	2020-03-07-12-55-08	2	2	80	85	92	106	114	Detection fixed reloc	0.652
2020	3	7	13	23	24.509	38.1961	22.7434	2.4	1.2	2	2020-03-07-13-23-24	2021-03-17-07-44-25	40	6	81	86	93	107	115	Detection fixed reloc	0.687
2020	3	7	14	14	55.37	38.0354	22.9331	6.32	0.2	2	2020-03-07-14-14-55	2020-07-21-19-07-56	15	1	82	87	94	108	116	Detection fixed reloc	0.713
2020	3	7	15	20	55.529	38.0632	22.9297	7.05	0.4	2	2020-03-07-15-20-55	2020-05-15-15-41-15	2	2	24	26	28	32	36	Detection fixed reloc	0.795
2020	3	7	16	24	44.921	38.0755	22.9239	5.97	0	2	2020-03-07-16-24-44	2020-05-24-20-08-36	2	2	70	75	80	95	103	Detection fixed reloc	0.717
2020	3	7	17	16	53.111	38.0606	22.9378	6.92	0.1	2	2020-03-07-17-16-53	2020-05-14-11-05-17	2	2	24	26	95	109	117	Detection fixed reloc	0.721
2020	3	7	19	8	6.421	38.0755	22.9239	5.97	0.4	2	2020-03-07-19-08-06	2020-05-24-20-08-36	2	2	70	75	80	95	103	Detection fixed reloc	0.763
2020	3	7	22	43	4.481	38.0755	22.9239	5.97	-0.4	2	2020-03-07-22-43-04	2020-05-24-20-08-36	2	2	70	75	80	95	103	Detection fixed reloc	0.616
2020	3	8	0	7	28.821	38.0755	22.9239	5.97	-0.4	2	2020-03-08-00-07-28	2020-05-24-20-08-36	2	2	70	75	80	95	103	Detection fixed reloc	0.636
2020	3	8	0	38	58.594	38.1493	22.6745	4.71	0.9	1	2020-03-08-00-38-58	2020-03-08-00-38-58	50	8	72	77	82	93	100	Template reloc	1
2020	3	8	0	39	12.838	38.127	22.6774	11.24	2	1	2020-03-08-00-38-14	2020-03-08-00-38-14	50	8	72	77	82	93	100	Template reloc	1
2020	3	8	0	41	9.079	38.1412	22.6765	11.54	2.2	1	2020-03-08-00-41-09	2020-03-08-00-41-09	50	8	72	77	82	94	101	Template reloc	1
2020	3	8	0	47	47.379	38.1412	22.6765	11.54	1	2	2020-03-08-00-47-47	2020-03-08-00-41-09	50	8	72	77	82	94	101	Detection fixed reloc	0.622
2020	3	8	1	44	40.464	38.0714	22.8788	11.44	0.5	2	2020-03-08-01-44-40	2020-02-21-21-38-17	32	3	47	51	55	61	67	Detection fixed reloc	0.629
2020	3	8	4	11	28.689	38.0632	22.9297	7.05	-0.5	2	2020-03-08-04-11-28	2020-05-15-15-41-15	2	2	24	26	28	32	36	Detection fixed reloc	0.711
2020	3	8	4	35	36.918	38.0682	22.8646	7.18	0.7	2	2020-03-08-04-35-36	2020-03-08-08-27-31	10	2	47	50	54	60	66	Detection fixed reloc	0.682
2020	3	8	5	59	59.648	38.0762	22.8787	11.74	0.8	2	2020-03-08-05-59-59	2020-02-24-10-31-24	35	3	27	54	58	64	70	Detection fixed reloc	0.662
2020	3	8	8	27	30.388	38.0682	22.8646	7.18	1.7	1	2020-03-08-08-27-31	2020-03-08-08-27-31	10	2	47	50	54	60	66	Template reloc	1
2020	3	8	14	36	53.385	38.241	22.719	11.18	1.4	1	2020-03-08-14-36-53	2020-03-08-14-36-53	58	7	83	88	96	110	118	Template reloc	1
2020	3	8	14	52	10.085	38.0621	22.8736	8.66	0	2	2020-03-08-14-52-10	2020-03-09-07-53-04	10	3	15	16	17	19	23	Detection fixed reloc	0.638
2020	3	8	19	35	48.745	38.0621	22.8736	8.66	-0.2	2	2020-03-08-19-35-48	2020-03-09-07-53-04	10	3	15	16	17	19	23	Detection fixed reloc	0.796
2020	3	8	19	37	29.616	38.0581	22.9433	7.82	0.1	2	2020-03-08-19-37-29	2020-05-15-22-57-01	2	2	65	70	75	86	93	Detection fixed reloc	0.622
2020	3	8	20	27	35.556	38.0581	22.9433	7.82	0.1	2	2020-03-08-20-27-35	2020-05-15-22-57-01	2	2	65	70	75	86	93	Detection fixed reloc	0.693
2020	3	8	20	45	31.524	38.0714	22.8788	11.44	0.6	2	2020-03-08-20-45-31	2020-02-21-21-38-17	32	3	47	51	55	61	67	Detection fixed reloc	0.631
2020	3	8	21	22	39.664	38.0714	22.8788	11.44	1.1	2	2020-03-08-21-22-39	2020-02-21-21-38-17	32	3	47	51	55	61	67	Detection fixed reloc	0.731
2020	3	8	23	31	32.044	38.0714	22.8788	11.44	0.3	2	2020-03-08-23-31-32	2020-02-21-21-38-17	32	3	47	51	55	61	67	Detection fixed reloc	0.629
2020	3	8	23	54	38.084	38.0714	22.8788	11.44	0.5	2	2020-03-08-23-54-38	2020-02-21-21-38-17	32	3	47	51	55	61	67	Detection fixed reloc	0.61
2020	3	9	4	37	53.245	38.0621	22.8736	8.66	-0.1	2	2020-03-09-04-37-53	2020-03-09-07-53-04	10	3	15	16	17	19	23	Detection fixed reloc	0.7
2020	3	9	4	39	2.699	38.1412	22.6765	11.54	1.2	2	2020-03-09-04-39-02	2020-03-08-00-41-09	50	8	72	77	82	94	101	Detection fixed reloc	0.618
2020	3	9	6	37	33.945	38.0621	22.8736	8.66	-0.6	2	2020-03-09-06-37-33	2020-03-09-07-53-04	10	3	15	16	17	19	23	Detection fixed reloc	0.88
2020	3	9	7	10	47.509	38.0635	22.8732	6.93	0.8	2	2020-03-09-07-10-47	2020-02-24-13-55-20	10	2	15	16	17	19	23	Detection fixed reloc	0.751
2020	3	9	7	53	4.615	38.0621	22.8736	8.66	1.5	1	2020-03-09-07-53-04	2020-03-09-07-53-04	10	3	15	16	17	19	23	Template reloc	1
2020	3	9	7	54	35.705	38.0621	22.8736	8.66	0	2	2020-03-09-07-54-35	2020-03-09-07-53-04	10	3	15	16	17	19	23	Detection fixed reloc	0.726
2020	3	9	9	15	0.323997	38.0714	22.8788	11.44	0.3	2	2020-03-09-09-15-00	2020-02-21-21-38-17	32	3	47	51	55	61	67	Detection fixed reloc	0.777
2020	3	9	10	32	42.065	38.0621	22.8736	8.66	0.1	2	2020-03-09-10-32-42	2020-03-09-07-53-04	10	3	15	16	17	19	23	Detection fixed reloc	0.914
2020	3	9	10	48	14.848	38.0762	22.8787	11.74	0.4	2	2020-03-09-10-48-14	2020-02-24-10-31-24	35	3	27	54	58	64	70	Detection fixed reloc	0.656
2020	3	9	11	10	41.506	38.0553	22.8729	9.65	0.1	2	2020-03-09-11-10-41	2020-02-26-10-09-35	10	3	15	16	17	19	19	Detection fixed reloc	0.748
2020	3	9	13	24	17.378	38.0459	22.9449	2.78	-0.2	2	2020-03-09-13-24-17	2020-05-09-00-00-51	15	1	84	89	97	111	119	Detection fixed reloc	0.725
2020	3	9	13	25	35.958	38.0459	22.9449	2.78	-0.1	2	2020-03-09-13-25-35	2020-05-09-00-00-51	15	1	84	89	97	111	119	Detection fixed reloc	0.684
2020	3	9	15	3	25.063	38.2394	22.5925	11.86	1.2	2	2020-03-09-15-03-25	2020-02-28-02-22-03	46	10	66	71	76	87	94	Detection fixed reloc	0.735
2020	3	9	16	13	56.478	38.0682	22.8646	7.18	1	2	2020-03-09-16-13-56	2020-03-08-08-27-31	10	2	47	50	54	60	66	Detection fixed reloc	0.617
2020	3	9	18	48	30.325	38.0621	22.8736	8.66	0.4	2	2020-03-09-18-48-30	2020-03-09-07-53-04	10	3	15	16	17	19	23	Detection fixed reloc	0.704
2020	3	9	20	30	4.145	38.0621	22.8736	8.66	0	2	2020-03-09-20-30-04	2020-03-09-07-53-04	10	3	15	16	17	19	23	Detection fixed reloc	0.661
2020	3	9	23	41	2.348	38.0762	22.8787	11.74	0.6	2	2020-03-09-23-41-02	2020-02-24-10-31-24	35	3	27	54	58	64	70	Detection fixed reloc	0.632
2020	3	9	23	49	37.942	38.0644	22.8703	7.85	0.4	2	2020-03-09-23-49-37	2020-02-25-12-38-06	10	2	15	16	17	84	91	Detection fixed reloc	0.718
2020	3	10	0	46	57.862	38.0644	22.8703	7.85	0.4	2	2020-03-10-00-46-57	2020-02-25-12-38-06	10	2	15	16	17	84	91	Detection fixed reloc	0.644
2020	3	10	1	22	42.805	38.0621	22.8736	8.66	0.9	2	2020-03-10-01-22-42	2020-03-09-07-53-04	10	3	15	16	17	19	23	Detection fixed reloc	0.858
2020	3	10	1	45	50.782	38.1531	22.6785	11.59	1.3	2	2020-03-10-01-45-50	2020-03-12-00-55-31	50	8	72	77	82	93	120	Detection fixed reloc	0.604
2020	3	10	2	19	38.522	38.0299	22.8833	10.02	0.7	2	2020-03-10-02-19-38	2020-02-24-18-54-02	10	3	15	16	17	19	19	Detection fixed reloc	0.916
2020	3	10	3	44	43.685	38.0621	22.8736	8.66	0.3	2	2020-03-10-03-44-43	2020-03-09-07-53-04	10	3	15	16	17	19	23	Detection fixed reloc	0.608
2020	3	10	5	16	44.128	38.0762	22.8787	11.74	0.8	2	2020-03-10-05-16-44	2020-02-24-10-31-24	35	3	27	54	58	64	70	Detection fixed reloc	0.678
2020	3	10	8	57	45.584	38.0714	22.8788	11.44	1.1	2	2020-03-10-08-57-45	2020-02-21-21-38-17	32	3	47	51	55	61	67	Detection fixed reloc	0.609
2020	3	10	11	2	52.064	38.0714	22.8788	11.44	0.5	2	2020-03-10-11-02-52	2020-02-21-21-38-17	32	3	47	51	55	61	67	Detection fixed reloc	0.725
2020	3	10	12	24	59.961	38.0755	22.9239	5.97	0.4	2	2020-03-10-12-24-59	2020-05-24-20-08-36	2	2	70	75	80	95	103	Detection fixed reloc	0.611
2020	3	10	13	14	36.296	38.1017	22.8923	12.31	0.1	2	2020-03-10-13-14-36	2020-03-06-02-29-41	48	2	69	74	79	90	97	Detection fixed reloc	0.681
2020	3	10	16	3	8.648	38.0762	22.8787	11.74	0.7	2	2020-03-10-16-03-08	2020-02-24-10-31-24	35	3	27	54	58	64	70	Detection fixed reloc	0.63
2020	3	10	21	19	31.348	38.0762	22.8787	11.74	0	2	2020-03-10-21-19-31	2020-02-24-10-31-24	35	3	27	54	58	64	70	Detection fixed reloc	0.696
2020	3	10	21	55	42.582	38.0644	22.8703	7.85	-0.1	2	2020-03-10-21-55-42	2020-02-25-12-38-06	10	2	15	16	17	84	91	Detection fixed reloc	0.618
2020	3	11	8	50	3.181	38.0755	22.9239	5.97	0.1	2	2020-03-11-08-50-03	2020-05-24-20-08-36	2	2	70	75	80	95	103	Detection fixed reloc	0.611
2020	3	11	9	44	33.664	38.0714	22.8788	11.44	1.2	2	2020-03-11-09-44-33	2020-02-21-21-38-17	32	3	47	51	55	61	67	Detection fixed reloc	0.604
2020	3	11	14	4	24.429	38.1961	22.7434	2.4	1.3	2	2020-03-11-14-04-24	2021-03-17-07-44-25	40	6	81	86	93	107	115	Detection fixed reloc	0.649
2020	3	11	14	24	9.575	38.1469	22.7226	13.94	2.6	1	2020-03-11-14-24-08	2020-03-11-14-24-08	59	6	85	90	98	112	121	Template reloc	1
2020	3	11	19	40	40.144	38.0714	22.8788	11.44	0.3	2	2020-03-11-19-40-40	2020-02-21-21-38-17	32	3	47	51	55	61	67	Detection fixed reloc	0.694
2020	3	11	21	30	4.403	38.0689	22.9381	9.08	-0.6	2	2020-03-11-21-30-04	2020-05-16-19-59-13	2	2	51	56	60	69	75	Detection fixed reloc	0.734
2020	3	11	22	43	23.124	38.0714	22.8788	11.44	0	2	2020-03-11-22-43-23	2020-02-21-21-38-17	32	3	47	51	55	61	67	Detection fixed reloc	0.773
2020	3	11	23	11	47.808	38.0762	22.8787	11.74	-0.3	2	2020-03-11-23-11-47	2020-02-24-10-31-24	35	3	27	54	58	64	70	Detection fixed reloc	0.769
2020	3	12	0	24	56.524	38.0714	22.8788	11.44	1.1	2	2020-03-12-00-24-56	2020-02-21-21-38-17	32	3	47	51	55	61	67	Detection fixed reloc	0.665
2020	3	12	0	55	30.052	38.1531	22.6785	11.59	1.7	1	2020-03-12-00-55-31	2020-03-12-00-55-31	50	8	72	77	82	93	120	Template reloc	1
2020	3	12	1	3	33.324	38.1493	22.6745	4.71	0.1	2	2020-03-12-01-03-33	2020-03-08-00-38-58	50	8	72	77	82	93	100	Detection fixed reloc	0.736
2020	3	12	1	14	41.059	38.1412	22.6765	11.54	0.7	2	2020-03-12-01-14-41	2020-03-08-00-41-09	50	8	72	77	82	94	101	Detection fixed reloc	0.684
2020	3	12	2	44	41.124	38.0714	22.8788	11.44	0.4	2	2020-03-12-02-44-41	2020-02-21-21-38-17	32	3	47	51	55	61	67	Detection fixed reloc	0.694
2020	3	12	3	16	2.189	38.0734	22.9095	5.35	-0.3	2	2020-03-12-03-16-02	2020-05-23-02-13-42	2	2	70	75	80	91	98	Detection fixed reloc	0.62
2020	3	12	4	1	28.504	38.0714	22.8788	11.44	0.4	2	2020-03-12-04-01-28	2020-02-21-21-38-17	32	3	47	51	55	61	67	Detection fixed reloc	0.606
2020	3	12	6	32	49.018	38.1493	22.6745	4.71	1.3	2	2020-03-12-06-32-49	2020-03-08-00-38-58	50	8	72	77	82	93	100	Detection fixed reloc	0.668
2020	3	12	7	40	41.278	38.1493	22.6745	4.71	1.2	2	2020-03-12-07-40-41	2020-03-08-00-38-58	50	8	72	77	82	93	100	Detection fixed reloc	0.674
2020	3	12	10	0	16.578	38.1493	22.6745	4.71	1.3	2	2020-03-12-10-00-16	2020-03-08-00-38-58	50	8	72	77	82	93	100	Detection fixed reloc	0.773
2020	3	12	16	8	26.844	38.1969	22.6188	15.75	1	2	2020-03-12-16-08-26	2020-02-18-02-46-53	37	9	53	58	62	68	74	Detection fixed reloc	0.77
2020	3	12	17	7	24.089	38.0632	22.9297	7.05	-0.2	2	2020-03-12-17-07-24	2020-05-15-15-41-15	2	2	24	26	28	32	36	Detection fixed reloc	0.697
2020	3	13	0	16	56.319	38.1573	22.59	8.51	1.1	1	2020-03-13-00-16-48	2020-03-13-00-16-48	60	10	86	91	99	113	122	Template reloc	1
2020	3	13	1	25	33.96	38.1807	22.7056	4.46	1	2	2020-03-13-01-25-33	2021-01-13-08-45-03	25	6	37	40	44	49	54	Detection fixed reloc	0.604
2020	3	13	8	48	35.027	38.0723	22.9323	8.1	-0.2	2	2020-03-13-08-48-35	2020-05-24-02-51-46	2	2	52	57	61	67	73	Detection fixed reloc	0.633
2020	3	13	10	13	28.261	38.0755	22.9239	5.97	0	2	2020-03-13-10-13-28	2020-05-24-20-08-36	2	2	70	75	80	95	103	Detection fixed reloc	0.719
2020	3	13	11	36	28.429	38.1961	22.7434	2.4	1.3	2	2020-03-13-11-36-28	2021-03-17-07-44-25	40	6	81	86	93	107	115	Detection fixed reloc	0.607
2020	3	13	14	16	31.128	38.0762	22.8787	11.74	0.6	2	2020-03-13-14-16-31	2020-02-24-10-31-24	35	3	27	54	58	64	70	Detection fixed reloc	0.602
2020	3	13	15	23	34.707	38.2013	22.6239	15.89	1.2	2	2020-03-13-15-23-34	2020-02-17-06-30-32	37	9	53	58	62	68	74	Detection fixed reloc	0.662
2020	3	13	23	36	56.669	38.0734	22.9095	5.35	-0.5	2	2020-03-13-23-36-56	2020-05-23-02-13-42	2	2	70	75	80	91	98	Detection fixed reloc	0.622
2020	3	14	5	44	19.37	38.0919	22.7979	13.08	0.6	2	2020-03-14-05-44-19	2020-08-03-10-55-35	5	4	87	92	100	114	123	Detection fixed reloc	0.648
2020	3	14	13	28	44.797	38.2511	22.6986	4.54	0.8	2	2020-03-14-13-28-44	2020-03-30-07-07-04	56	7	78	83	89	102	110	Detection fixed reloc	0.808
2020	3	14	13	33	36.489	38.0734	22.9095	5.35	-0.1	2	2020-03-14-13-33-36	2020-05-23-02-13-42	2	2	70	75	80	91	98	Detection fixed reloc	0.673
2020	3	14	21	3	42.728	38.0762	22.8787	11.74	0.7	2	2020-03-14-21-03-42	2020-02-24-10-31-24	35	3	27	54	58	64	70	Detection fixed reloc	0.654
2020	3	14	21	15	50.198	38.1494	22.9741	6.16	1.4	2	2020-03-14-21-15-50	2020-03-07-08-20-11	2	2	80	85	91	105	113	Detection fixed reloc	0.728
2020	3	14	22	16	57.282	38.0527	22.9332	7.94	0.9	2	2020-03-14-22-16-57	2020-08-05-05-35-16	2	2	56	61	66	75	81	Detection fixed reloc	0.719
2020	3	14	23	49	25.077	38.0175	22.9372	11.51	0.3	2	2020-03-14-23-49-25	2020-08-15-01-51-15	17	1	26	28	30	35	39	Detection fixed reloc	0.614
2020	3	15	2	45	8.917	38.1078	22.7144	9.42	1.2	1	2020-03-15-02-44-40	2020-03-15-02-44-40	61	8	88	93	101	115	124	Template reloc	1
2020	3	15	3	26	1.028	38.0762	22.8787	11.74	0.6	2	2020-03-15-03-26-01	2020-02-24-10-31-24	35	3	27	54	58	64	70	Detection fixed reloc	0.667
2020	3	15	5	55	45.709	38.0632	22.9297	7.05	-0.5	2	2020-03-15-05-55-45	2020-05-15-15-41-15	2	2	24	26	28	32	36	Detection fixed reloc	0.633
2020	3	15	17	39	3.8	38.2152	22.6152	15.03	1.7	2	2020-03-15-17-39-03	2020-03-23-23-33-00	37	9	53	94	102	116	125	Detection fixed reloc	0.887
2020	3	15	17	51	23.477	38.1078	22.7144	9.42	0.8	2	2020-03-15-17-51-23	2020-03-15-02-44-40	61	8	88	93	101	115	124	Detection fixed reloc	0.871
2020	3	15	20	0	5.937	38.1078	22.7144	9.42	1.1	2	2020-03-15-20-00-05	2020-03-15-02-44-40	61	8	88	93	101	115	124	Detection fixed reloc	0.885
2020	3	15	22	13	28.597	38.1078	22.7144	9.42	0.6	2	2020-03-15-22-13-28	2020-03-15-02-44-40	61	8	88	93	101	115	124	Detection fixed reloc	0.766
2020	3	16	6	46	5.201	38.0755	22.9239	5.97	0.1	2	2020-03-16-06-46-05	2020-05-24-20-08-36	2	2	70	75	80	95	103	Detection fixed reloc	0.619
2020	3	16	15	58	1.597	38.1078	22.7144	9.42	0.6	2	2020-03-16-15-58-01	2020-03-15-02-44-40	61	8	88	93	101	115	124	Detection fixed reloc	0.67
2020	3	16	15	58	47.997	38.3535	22.6923	28.62	1.6	1	2020-03-16-15-58-47	2020-03-16-15-58-47	62	7	89	95	103	117	126	Template reloc	1
2020	3	16	19	31	55.701	38.0755	22.9239	5.97	0.2	2	2020-03-16-19-31-55	2020-05-24-20-08-36	2	2	70	75	80	95	103	Detection fixed reloc	0.609
2020	3	16	21	21	17.68	38.1746	22.7206	8.95	1.1	1	2020-03-16-21-21-17	2020-03-16-21-21-17	24	6	36	39	43	48	53	Template reloc	1
2020	3	17	3	35	57.317	38.1078	22.7144	9.42	0.7	2	2020-03-17-03-35-57	2020-03-15-02-44-40	61	8	88	93	101	115	124	Detection fixed reloc	0.717
2020	3	17	3	36	21.257	38.1078	22.7144	9.42	1.2	2	2020-03-17-03-36-21	2020-03-15-02-44-40	61	8	88	93	101	115	124	Detection fixed reloc	0.83
2020	3	17	3	53	10.317	38.1078	22.7144	9.42	0.5	2	2020-03-17-03-53-10	2020-03-15-02-44-40	61	8	88	93	101	115	124	Detection fixed reloc	0.836
2020	3	17	3	58	26.777	38.1078	22.7144	9.42	0.5	2	2020-03-17-03-58-26	2020-03-15-02-44-40	61	8	88	93	101	115	124	Detection fixed reloc	0.874
2020	3	17	3	58	59.617	38.1078	22.7144	9.42	1.1	2	2020-03-17-03-58-59	2020-03-15-02-44-40	61	8	88	93	101	115	124	Detection fixed reloc	0.76
2020	3	17	4	3	33.468	38.0762	22.8787	11.74	0.6	2	2020-03-17-04-03-33	2020-02-24-10-31-24	35	3	27	54	58	64	70	Detection fixed reloc	0.717
2020	3	17	10	25	29.969	38.026	22.961	4.87	0.2	2	2020-03-17-10-25-29	2020-05-03-09-56-04	2	1	35	96	104	118	127	Detection fixed reloc	0.602
2020	3	17	11	3	55.519	38.0595	22.9346	7.16	0.2	2	2020-03-17-11-03-55	2020-07-08-12-31-35	2	2	24	26	28	32	36	Detection fixed reloc	0.673
2020	3	17	13	38	48.307	38.0272	22.9624	8.06	0.2	2	2020-03-17-13-38-48	2020-03-20-01-36-14	2	1	4	4	4	4	4	Detection fixed reloc	0.623
2020	3	17	18	12	24.527	38.0272	22.9624	8.06	0	2	2020-03-17-18-12-24	2020-03-20-01-36-14	2	1	4	4	4	4	4	Detection fixed reloc	0.765
2020	3	17	19	46	50.947	38.0272	22.9624	8.06	0.1	2	2020-03-17-19-46-50	2020-03-20-01-36-14	2	1	4	4	4	4	4	Detection fixed reloc	0.702
2020	3	17	20	51	49.96	38.1746	22.7206	8.95	0.1	2	2020-03-17-20-51-49	2020-03-16-21-21-17	24	6	36	39	43	48	53	Detection fixed reloc	0.823
2020	3	18	6	39	47.54	38.0769	22.9218	6.71	0.3	2	2020-03-18-06-39-47	2020-05-19-23-34-33	2	2	52	57	61	67	73	Detection fixed reloc	0.702
2020	3	18	6	47	40.887	38.0272	22.9624	8.06	0	2	2020-03-18-06-47-40	2020-03-20-01-36-14	2	1	4	4	4	4	4	Detection fixed reloc	0.715
2020	3	18	7	59	23.959	38.1867	22.7344	12.22	1.5	1	2020-03-18-07-59-23	2020-03-18-07-59-23	24	6	36	39	43	48	55	Template reloc	1
2020	3	18	9	33	3.967	38.0272	22.9624	8.06	-0.1	2	2020-03-18-09-33-03	2020-03-20-01-36-14	2	1	4	4	4	4	4	Detection fixed reloc	0.784
2020	3	18	13	10	57.538	38.0283	22.9468	8.52	-0.1	2	2020-03-18-13-10-57	2020-05-16-19-57-00	2	1	24	26	95	109	117	Detection fixed reloc	0.718
2020	3	18	14	39	23.57	38.2174	22.5861	9.55	0.8	2	2020-03-18-14-39-23	2021-02-21-19-33-19	63	10	90	97	105	119	128	Detection fixed reloc	0.64
2020	3	18	16	31	33.507	38.0272	22.9624	8.06	-0.1	2	2020-03-18-16-31-33	2020-03-20-01-36-14	2	1	4	4	4	4	4	Detection fixed reloc	0.715
2020	3	18	20	25	56.487	38.0272	22.9624	8.06	-0.2	2	2020-03-18-20-25-56	2020-03-20-01-36-14	2	1	4	4	4	4	4	Detection fixed reloc	0.75
2020	3	18	20	26	38.987	38.0272	22.9624	8.06	-0.3	2	2020-03-18-20-26-38	2020-03-20-01-36-14	2	1	4	4	4	4	4	Detection fixed reloc	0.608
2020	3	18	21	34	4.289	38.1867	22.7344	12.22	0.8	2	2020-03-18-21-34-04	2020-03-18-07-59-23	24	6	36	39	43	48	55	Detection fixed reloc	0.601
2020	3	18	21	41	49.685	38.0621	22.8736	8.66	-0.2	2	2020-03-18-21-41-49	2020-03-09-07-53-04	10	3	15	16	17	19	23	Detection fixed reloc	0.702
2020	3	19	0	17	36.165	38.0621	22.8736	8.66	-0.2	2	2020-03-19-00-17-36	2020-03-09-07-53-04	10	3	15	16	17	19	23	Detection fixed reloc	0.856
2020	3	19	4	45	17.987	38.0272	22.9624	8.06	0.1	2	2020-03-19-04-45-17	2020-03-20-01-36-14	2	1	4	4	4	4	4	Detection fixed reloc	0.818
2020	3	19	4	58	34.887	38.0272	22.9624	8.06	0.2	2	2020-03-19-04-58-34	2020-03-20-01-36-14	2	1	4	4	4	4	4	Detection fixed reloc	0.615
2020	3	19	9	34	5.389	38.1961	22.7434	2.4	1.3	2	2020-03-19-09-34-05	2021-03-17-07-44-25	40	6	81	86	93	107	115	Detection fixed reloc	0.614
2020	3	19	11	45	37.867	38.0272	22.9624	8.06	0	2	2020-03-19-11-45-37	2020-03-20-01-36-14	2	1	4	4	4	4	4	Detection fixed reloc	0.768
2020	3	19	12	27	52.016	38.0525	22.9061	11.36	0.5	2	2020-03-19-12-27-52	2020-04-28-02-43-29	18	2	27	29	31	36	41	Detection fixed reloc	0.658
2020	3	19	12	32	39.185	38.0345	22.9682	6.63	0.4	2	2020-03-19-12-32-39	2020-04-05-02-42-13	2	1	4	98	106	120	129	Detection fixed reloc	0.608
2020	3	19	12	58	28.596	38.0525	22.9061	11.36	1.1	2	2020-03-19-12-58-28	2020-04-28-02-43-29	18	2	27	29	31	36	41	Detection fixed reloc	0.716
2020	3	19	19	27	8.737	38.1078	22.7144	9.42	0.8	2	2020-03-19-19-27-08	2020-03-15-02-44-40	61	8	88	93	101	115	124	Detection fixed reloc	0.671
2020	3	19	19	50	27.967	38.0272	22.9624	8.06	0.2	2	2020-03-19-19-50-27	2020-03-20-01-36-14	2	1	4	4	4	4	4	Detection fixed reloc	0.781
2020	3	19	20	9	52.187	38.0272	22.9624	8.06	-0.1	2	2020-03-19-20-09-52	2020-03-20-01-36-14	2	1	4	4	4	4	4	Detection fixed reloc	0.848
2020	3	19	20	32	19.907	38.0272	22.9624	8.06	0.1	2	2020-03-19-20-32-19	2020-03-20-01-36-14	2	1	4	4	4	4	4	Detection fixed reloc	0.615
2020	3	19	21	32	21	38.1807	22.7056	4.46	0.2	2	2020-03-19-21-32-21	2021-01-13-08-45-03	25	6	37	40	44	49	54	Detection fixed reloc	0.91
2020	3	19	21	46	46.849	38.2014	22.5607	16.51	1.4	1	2020-03-19-21-46-47	2020-03-19-21-46-47	64	10	91	99	107	121	130	Template reloc	1
2020	3	19	22	25	54.387	38.0272	22.9624	8.06	0.3	2	2020-03-19-22-25-54	2020-03-20-01-36-14	2	1	4	4	4	4	4	Detection fixed reloc	0.726
2020	3	19	22	49	41.207	38.0272	22.9624	8.06	-0.2	2	2020-03-19-22-49-41	2020-03-20-01-36-14	2	1	4	4	4	4	4	Detection fixed reloc	0.855
2020	3	19	23	50	26.387	38.0272	22.9624	8.06	-0.2	2	2020-03-19-23-50-26	2020-03-20-01-36-14	2	1	4	4	4	4	4	Detection fixed reloc	0.683
2020	3	20	1	35	16.567	38.0272	22.9624	8.06	-0.1	2	2020-03-20-01-35-16	2020-03-20-01-36-14	2	1	4	4	4	4	4	Detection fixed reloc	0.856
2020	3	20	1	36	31.947	38.0272	22.9624	8.06	2.5	1	2020-03-20-01-36-14	2020-03-20-01-36-14	2	1	4	4	4	4	4	Template reloc	1
2020	3	20	1	39	45.847	38.0272	22.9624	8.06	-0.1	2	2020-03-20-01-39-45	2020-03-20-01-36-14	2	1	4	4	4	4	4	Detection fixed reloc	0.731
2020	3	20	1	44	43.007	38.0272	22.9624	8.06	0.1	2	2020-03-20-01-44-43	2020-03-20-01-36-14	2	1	4	4	4	4	4	Detection fixed reloc	0.803
2020	3	20	1	51	29.427	38.0272	22.9624	8.06	-0.3	2	2020-03-20-01-51-29	2020-03-20-01-36-14	2	1	4	4	4	4	4	Detection fixed reloc	0.61
2020	3	20	2	6	48.047	38.0272	22.9624	8.06	0.2	2	2020-03-20-02-06-48	2020-03-20-01-36-14	2	1	4	4	4	4	4	Detection fixed reloc	0.719
2020	3	20	2	55	39.527	38.0272	22.9624	8.06	-0.1	2	2020-03-20-02-55-39	2020-03-20-01-36-14	2	1	4	4	4	4	4	Detection fixed reloc	0.724
2020	3	20	3	23	37.287	38.0272	22.9624	8.06	-0.1	2	2020-03-20-03-23-37	2020-03-20-01-36-14	2	1	4	4	4	4	4	Detection fixed reloc	0.727
2020	3	20	4	1	41.227	38.0272	22.9624	8.06	-0.2	2	2020-03-20-04-01-41	2020-03-20-01-36-14	2	1	4	4	4	4	4	Detection fixed reloc	0.721
2020	3	20	4	7	3.347	38.0272	22.9624	8.06	0.2	2	2020-03-20-04-07-03	2020-03-20-01-36-14	2	1	4	4	4	4	4	Detection fixed reloc	0.802
2020	3	20	4	34	38.607	38.0272	22.9624	8.06	0	2	2020-03-20-04-34-38	2020-03-20-01-36-14	2	1	4	4	4	4	4	Detection fixed reloc	0.706
2020	3	20	5	19	12.827	38.0272	22.9624	8.06	-0.1	2	2020-03-20-05-19-12	2020-03-20-01-36-14	2	1	4	4	4	4	4	Detection fixed reloc	0.713
2020	3	20	7	37	8.573	38.0898	22.8371	12.08	0.8	2	2020-03-20-07-37-08	2021-01-20-10-41-41	5	4	11	100	108	122	131	Detection fixed reloc	0.606
2020	3	20	9	42	53.087	38.0272	22.9624	8.06	0.4	2	2020-03-20-09-42-53	2020-03-20-01-36-14	2	1	4	4	4	4	4	Detection fixed reloc	0.784
2020	3	20	9	55	49.677	38.0306	22.9651	6.84	-0.3	2	2020-03-20-09-55-49	2020-04-03-09-15-41	2	1	4	98	106	120	132	Detection fixed reloc	0.69
2020	3	20	12	48	49.027	38.0272	22.9624	8.06	0.7	2	2020-03-20-12-48-49	2020-03-20-01-36-14	2	1	4	4	4	4	4	Detection fixed reloc	0.701
2020	3	20	14	22	47.147	38.0272	22.9624	8.06	-0.1	2	2020-03-20-14-22-47	2020-03-20-01-36-14	2	1	4	4	4	4	4	Detection fixed reloc	0.719
2020	3	20	15	8	46.967	38.0272	22.9624	8.06	0.1	2	2020-03-20-15-08-46	2020-03-20-01-36-14	2	1	4	4	4	4	4	Detection fixed reloc	0.67
2020	3	20	15	53	5.427	38.0272	22.9624	8.06	0.9	2	2020-03-20-15-53-05	2020-03-20-01-36-14	2	1	4	4	4	4	4	Detection fixed reloc	0.829
2020	3	20	16	39	41.427	38.0272	22.9624	8.06	0.3	2	2020-03-20-16-39-41	2020-03-20-01-36-14	2	1	4	4	4	4	4	Detection fixed reloc	0.752
2020	3	20	20	13	30.747	38.0272	22.9624	8.06	0.6	2	2020-03-20-20-13-30	2020-03-20-01-36-14	2	1	4	4	4	4	4	Detection fixed reloc	0.667
2020	3	20	20	35	1.067	38.0272	22.9624	8.06	0	2	2020-03-20-20-35-01	2020-03-20-01-36-14	2	1	4	4	4	4	4	Detection fixed reloc	0.655
2020	3	20	20	37	13.417	38.0306	22.9651	6.84	0.1	2	2020-03-20-20-37-13	2020-04-03-09-15-41	2	1	4	98	106	120	132	Detection fixed reloc	0.694
2020	3	20	20	59	38.447	38.0272	22.9624	8.06	0.2	2	2020-03-20-20-59-38	2020-03-20-01-36-14	2	1	4	4	4	4	4	Detection fixed reloc	0.696
2020	3	20	21	28	39.997	38.0306	22.9651	6.84	0.2	2	2020-03-20-21-28-39	2020-04-03-09-15-41	2	1	4	98	106	120	132	Detection fixed reloc	0.612
2020	3	21	0	34	17.703	38.1477	22.6905	12.92	1	2	2020-03-21-00-34-17	2021-03-17-19-48-08	65	8	92	101	109	123	133	Detection fixed reloc	0.612
2020	3	21	0	44	50.747	38.0272	22.9624	8.06	0.3	2	2020-03-21-00-44-50	2020-03-20-01-36-14	2	1	4	4	4	4	4	Detection fixed reloc	0.646
2020	3	21	1	2	39.844	38.0714	22.8788	11.44	0.5	2	2020-03-21-01-02-39	2020-02-21-21-38-17	32	3	47	51	55	61	67	Detection fixed reloc	0.646
2020	3	21	5	52	8.387	38.0272	22.9624	8.06	0.9	2	2020-03-21-05-52-08	2020-03-20-01-36-14	2	1	4	4	4	4	4	Detection fixed reloc	0.657
2020	3	21	7	1	45.481	38.1741	22.7516	15.29	1.3	2	2020-03-21-07-01-45	2021-03-07-23-38-11	40	6	58	63	68	77	134	Detection fixed reloc	0.705
2020	3	21	7	45	17.847	38.0272	22.9624	8.06	0.5	2	2020-03-21-07-45-17	2020-03-20-01-36-14	2	1	4	4	4	4	4	Detection fixed reloc	0.722
2020	3	21	8	53	40.747	38.0272	22.9624	8.06	0.1	2	2020-03-21-08-53-40	2020-03-20-01-36-14	2	1	4	4	4	4	4	Detection fixed reloc	0.658
2020	3	21	9	17	39.547	38.0272	22.9624	8.06	0.3	2	2020-03-21-09-17-39	2020-03-20-01-36-14	2	1	4	4	4	4	4	Detection fixed reloc	0.68
2020	3	21	9	25	20.847	38.0272	22.9624	8.06	0.4	2	2020-03-21-09-25-20	2020-03-20-01-36-14	2	1	4	4	4	4	4	Detection fixed reloc	0.645
2020	3	21	11	18	58.787	38.0723	22.9323	8.1	-0.2	2	2020-03-21-11-18-58	2020-05-24-02-51-46	2	2	52	57	61	67	73	Detection fixed reloc	0.741
2020	3	21	15	10	5.337	38.0306	22.9651	6.84	-0.4	2	2020-03-21-15-10-05	2020-04-03-09-15-41	2	1	4	98	106	120	132	Detection fixed reloc	0.681
2020	3	21	15	49	7.247	38.0272	22.9624	8.06	1.1	2	2020-03-21-15-49-07	2020-03-20-01-36-14	2	1	4	4	4	4	4	Detection fixed reloc	0.712
2020	3	21	17	43	16.027	38.0272	22.9624	8.06	0.2	2	2020-03-21-17-43-16	2020-03-20-01-36-14	2	1	4	4	4	4	4	Detection fixed reloc	0.669
2020	3	21	17	51	37.987	38.0272	22.9624	8.06	0.3	2	2020-03-21-17-51-37	2020-03-20-01-36-14	2	1	4	4	4	4	4	Detection fixed reloc	0.601
2020	3	21	19	51	15.647	38.0272	22.9624	8.06	0.2	2	2020-03-21-19-51-15	2020-03-20-01-36-14	2	1	4	4	4	4	4	Detection fixed reloc	0.622
2020	3	21	22	25	28.087	38.0272	22.9624	8.06	0.2	2	2020-03-21-22-25-28	2020-03-20-01-36-14	2	1	4	4	4	4	4	Detection fixed reloc	0.863
2020	3	21	23	11	8.007	38.0272	22.9624	8.06	0.2	2	2020-03-21-23-11-08	2020-03-20-01-36-14	2	1	4	4	4	4	4	Detection fixed reloc	0.685
2020	3	21	23	25	27.043	38.1743	22.6591	13.27	2.3	1	2020-03-21-23-25-28	2020-03-21-23-25-28	66	9	93	102	110	124	135	Template reloc	1
2020	3	21	23	40	4.875	38.1762	22.7051	6.16	0.4	2	2020-03-21-23-40-04	2020-09-07-02-50-31	57	6	79	84	90	103	111	Detection fixed reloc	0.856
2020	3	22	3	1	42.474	38.0456	22.9417	8.07	0.4	2	2020-03-22-03-01-42	2020-05-22-18-58-33	2	1	94	103	111	125	136	Detection fixed reloc	0.605
2020	3	22	5	43	19.367	38.0272	22.9624	8.06	0	2	2020-03-22-05-43-19	2020-03-20-01-36-14	2	1	4	4	4	4	4	Detection fixed reloc	0.675
2020	3	22	8	39	16.09	38.0412	22.9745	6.12	1.4	1	2020-03-22-08-39-16	2020-03-22-08-39-16	2	1	95	104	112	126	137	Template reloc	1
2020	3	22	8	40	25.333	38.0249	22.9602	6.75	0	2	2020-03-22-08-40-25	2020-04-03-09-36-54	2	1	4	98	106	120	132	Detection fixed reloc	0.669
2020	3	22	12	24	10.127	38.0272	22.9624	8.06	0.3	2	2020-03-22-12-24-10	2020-03-20-01-36-14	2	1	4	4	4	4	4	Detection fixed reloc	0.601
2020	3	22	17	12	38.867	38.0272	22.9624	8.06	0.3	2	2020-03-22-17-12-38	2020-03-20-01-36-14	2	1	4	4	4	4	4	Detection fixed reloc	0.681
2020	3	22	19	36	58.222	38.1586	22.6824	12.34	1	2	2020-03-22-19-36-58	2020-12-03-18-14-47	67	8	96	105	113	127	138	Detection fixed reloc	0.651
2020	3	22	20	6	23.567	38.0272	22.9624	8.06	-0.1	2	2020-03-22-20-06-23	2020-03-20-01-36-14	2	1	4	4	4	4	4	Detection fixed reloc	0.769
2020	3	22	20	31	6.947	38.0272	22.9624	8.06	1	2	2020-03-22-20-31-06	2020-03-20-01-36-14	2	1	4	4	4	4	4	Detection fixed reloc	0.674
2020	3	23	1	15	10.087	38.0272	22.9624	8.06	0.3	2	2020-03-23-01-15-10	2020-03-20-01-36-14	2	1	4	4	4	4	4	Detection fixed reloc	0.709
2020	3	23	16	19	43.872	38.2078	22.6178	16.27	2.3	1	2020-03-23-16-19-44	2020-03-23-16-19-44	37	9	53	94	102	128	139	Template reloc	1
2020	3	23	16	21	34.14	38.2152	22.6152	15.03	1.7	2	2020-03-23-16-21-34	2020-03-23-23-33-00	37	9	53	94	102	116	125	Detection fixed reloc	0.89
2020	3	23	16	24	42.302	38.2078	22.6178	16.27	0.9	2	2020-03-23-16-24-42	2020-03-23-16-19-44	37	9	53	94	102	128	139	Detection fixed reloc	0.714
2020	3	23	16	25	16.54	38.2152	22.6152	15.03	0.9	2	2020-03-23-16-25-16	2020-03-23-23-33-00	37	9	53	94	102	116	125	Detection fixed reloc	0.655
2020	3	23	18	22	57.786	38.2103	22.6162	5.66	0.9	2	2020-03-23-18-22-57	2020-05-05-19-22-08	37	10	53	94	102	116	140	Detection fixed reloc	0.88
2020	3	23	18	59	41.786	38.2103	22.6162	5.66	0.6	2	2020-03-23-18-59-41	2020-05-05-19-22-08	37	10	53	94	102	116	140	Detection fixed reloc	0.64
2020	3	23	21	40	26.691	38.2152	22.6185	5.51	1.4	1	2020-03-23-21-40-26	2020-03-23-21-40-26	37	10	53	94	102	128	139	Template reloc	1
2020	3	23	23	33	0.949997	38.2152	22.6152	15.03	1.6	1	2020-03-23-23-33-00	2020-03-23-23-33-00	37	9	53	94	102	116	125	Template reloc	1
2020	3	23	23	37	20.427	38.0272	22.9624	8.06	0	2	2020-03-23-23-37-20	2020-03-20-01-36-14	2	1	4	4	4	4	4	Detection fixed reloc	0.752
2020	3	24	0	2	58.707	38.0272	22.9624	8.06	0	2	2020-03-24-00-02-58	2020-03-20-01-36-14	2	1	4	4	4	4	4	Detection fixed reloc	0.726
2020	3	24	4	34	44.307	38.0272	22.9624	8.06	0.2	2	2020-03-24-04-34-44	2020-03-20-01-36-14	2	1	4	4	4	4	4	Detection fixed reloc	0.648
2020	3	24	8	29	5.142	38.2078	22.6178	16.27	0.7	2	2020-03-24-08-29-05	2020-03-23-16-19-44	37	9	53	94	102	128	139	Detection fixed reloc	0.772
2020	3	24	11	38	34.239	38.1954	22.7372	7.75	1.6	2	2020-03-24-11-38-34	2021-03-17-11-25-24	40	6	97	106	114	129	141	Detection fixed reloc	0.681
2020	3	24	13	39	21.691	38.2272	22.5916	23.12	1.5	1	2020-03-24-13-39-21	2020-03-24-13-39-21	68	10	66	107	115	130	142	Template reloc	1
2020	3	24	13	40	8.429	38.1896	22.6112	22.86	0.9	2	2020-03-24-13-40-08	2020-03-24-23-34-55	37	10	53	94	102	116	143	Detection fixed reloc	0.765
2020	3	24	17	17	4.787	38.0272	22.9624	8.06	0.3	2	2020-03-24-17-17-04	2020-03-20-01-36-14	2	1	4	4	4	4	4	Detection fixed reloc	0.775
2020	3	24	20	42	38.431	38.2152	22.6185	5.51	0.8	2	2020-03-24-20-42-38	2020-03-23-21-40-26	37	10	53	94	102	128	139	Detection fixed reloc	0.63
2020	3	24	21	38	36.112	38.1716	22.7006	3.68	1	2	2020-03-24-21-38-36	2020-11-19-23-31-44	25	6	37	40	44	49	144	Detection fixed reloc	0.71
2020	3	24	21	41	29.727	38.0272	22.9624	8.06	0.2	2	2020-03-24-21-41-29	2020-03-20-01-36-14	2	1	4	4	4	4	4	Detection fixed reloc	0.606
2020	3	24	23	34	55.309	38.1896	22.6112	22.86	1.4	1	2020-03-24-23-34-55	2020-03-24-23-34-55	37	10	53	94	102	116	143	Template reloc	1
2020	3	25	1	11	21.567	38.0272	22.9624	8.06	0	2	2020-03-25-01-11-21	2020-03-20-01-36-14	2	1	4	4	4	4	4	Detection fixed reloc	0.704
2020	3	25	1	40	28.027	38.0272	22.9624	8.06	0.6	2	2020-03-25-01-40-28	2020-03-20-01-36-14	2	1	4	4	4	4	4	Detection fixed reloc	0.67
2020	3	25	2	24	55.087	38.0272	22.9624	8.06	0.1	2	2020-03-25-02-24-55	2020-03-20-01-36-14	2	1	4	4	4	4	4	Detection fixed reloc	0.707
2020	3	25	3	57	20.047	38.0723	22.9323	8.1	-0.1	2	2020-03-25-03-57-20	2020-05-24-02-51-46	2	2	52	57	61	67	73	Detection fixed reloc	0.629
2020	3	25	5	32	47.267	38.0723	22.9323	8.1	0	2	2020-03-25-05-32-47	2020-05-24-02-51-46	2	2	52	57	61	67	73	Detection fixed reloc	0.777
2020	3	25	10	43	33.987	38.0272	22.9624	8.06	0.2	2	2020-03-25-10-43-33	2020-03-20-01-36-14	2	1	4	4	4	4	4	Detection fixed reloc	0.658
2020	3	25	14	34	19.867	38.0723	22.9323	8.1	-0.1	2	2020-03-25-14-34-19	2020-05-24-02-51-46	2	2	52	57	61	67	73	Detection fixed reloc	0.654
2020	3	25	18	7	46.067	38.0272	22.9624	8.06	0.1	2	2020-03-25-18-07-46	2020-03-20-01-36-14	2	1	4	4	4	4	4	Detection fixed reloc	0.714
2020	3	25	23	12	12.266	38.2571	22.7171	16.63	1.8	1	2020-03-25-23-12-12	2020-03-25-23-12-12	69	7	98	108	116	131	145	Template reloc	1
2020	3	26	1	41	57.758	38.2614	22.7197	17.78	1.8	1	2020-03-26-01-41-58	2020-03-26-01-41-58	69	7	98	108	116	131	145	Template reloc	1
2020	3	26	2	4	57.646	38.2571	22.7171	16.63	1.3	2	2020-03-26-02-04-57	2020-03-25-23-12-12	69	7	98	108	116	131	145	Detection fixed reloc	0.895
2020	3	27	4	29	38.747	38.1715	22.604	16.76	1.6	1	2020-03-27-04-29-40	2020-03-27-04-29-40	70	9	54	59	117	132	146	Template reloc	1
2020	3	27	15	12	57.859	38.168	22.7269	2.81	1.8	1	2020-03-27-15-12-58	2020-03-27-15-12-58	71	6	99	109	118	133	147	Template reloc	1
2020	3	27	15	17	8.395	38.0836	22.7559	12.29	1.7	1	2020-03-27-15-17-08	2020-03-27-15-17-08	72	4	99	110	119	134	148	Template reloc	1
2020	3	27	15	18	14.395	38.0836	22.7559	12.29	1	2	2020-03-27-15-18-14	2020-03-27-15-17-08	72	4	99	110	119	134	148	Detection fixed reloc	0.628
2020	3	27	18	34	39.494	38.0794	22.8963	8.46	0.5	2	2020-03-27-18-34-39	2020-06-24-06-03-24	73	2	100	111	120	135	149	Detection fixed reloc	0.725
2020	3	27	20	25	49.955	38.0836	22.7559	12.29	1	2	2020-03-27-20-25-49	2020-03-27-15-17-08	72	4	99	110	119	134	148	Detection fixed reloc	0.637
2020	3	28	1	17	25.474	38.0794	22.8963	8.46	0	2	2020-03-28-01-17-25	2020-06-24-06-03-24	73	2	100	111	120	135	149	Detection fixed reloc	0.738
2020	3	28	5	16	32.73	38.127	22.7357	13	1.5	1	2020-03-28-05-16-08	2020-03-28-05-16-08	72	8	99	110	121	136	150	Template reloc	1
2020	3	28	5	18	57.52	38.127	22.7357	13	0.9	2	2020-03-28-05-18-57	2020-03-28-05-16-08	72	8	99	110	121	136	150	Detection fixed reloc	0.772
2020	3	28	16	9	42.354	38.0794	22.8963	8.46	0	2	2020-03-28-16-09-42	2020-06-24-06-03-24	73	2	100	111	120	135	149	Detection fixed reloc	0.604
2020	3	29	9	44	35.545	38.0345	22.9682	6.63	0	2	2020-03-29-09-44-35	2020-04-05-02-42-13	2	1	4	98	106	120	129	Detection fixed reloc	0.619
2020	3	30	7	7	4.877	38.2511	22.6986	4.54	1.4	1	2020-03-30-07-07-04	2020-03-30-07-07-04	56	7	78	83	89	102	110	Template reloc	1
2020	3	30	9	52	57.345	38.0345	22.9682	6.63	-0.3	2	2020-03-30-09-52-57	2020-04-05-02-42-13	2	1	4	98	106	120	129	Detection fixed reloc	0.617
2020	3	30	16	42	10.725	38.0591	22.9326	6.56	-0.4	2	2020-03-30-16-42-10	2020-07-06-20-38-19	2	2	101	112	122	137	151	Detection fixed reloc	0.827
2020	3	31	5	22	52.677	38.0306	22.9651	6.84	-0.5	2	2020-03-31-05-22-52	2020-04-03-09-15-41	2	1	4	98	106	120	132	Detection fixed reloc	0.844
2020	3	31	6	56	29.802	38.0197	22.8408	15.93	1.3	1	2020-03-31-06-56-33	2020-03-31-06-56-33	74	3	102	113	123	138	152	Template reloc	1
2020	3	31	9	12	53.877	38.0306	22.9651	6.84	0.8	2	2020-03-31-09-12-53	2020-04-03-09-15-41	2	1	4	98	106	120	132	Detection fixed reloc	0.852
2020	3	31	12	6	38.612	38.0197	22.8408	15.93	0.8	2	2020-03-31-12-06-38	2020-03-31-06-56-33	74	3	102	113	123	138	152	Detection fixed reloc	0.965
2020	3	31	20	55	2.117	38.0306	22.9651	6.84	-0.5	2	2020-03-31-20-55-02	2020-04-03-09-15-41	2	1	4	98	106	120	132	Detection fixed reloc	0.612
2020	4	1	16	23	45.397	38.0306	22.9651	6.84	-0.6	2	2020-04-01-16-23-45	2020-04-03-09-15-41	2	1	4	98	106	120	132	Detection fixed reloc	0.654
2020	4	1	16	32	31.497	38.0306	22.9651	6.84	-0.8	2	2020-04-01-16-32-31	2020-04-03-09-15-41	2	1	4	98	106	120	132	Detection fixed reloc	0.85
2020	4	1	18	25	1.374	38.1162	22.767	9.93	0.5	2	2020-04-01-18-25-01	2020-10-01-16-49-54	75	4	103	114	124	139	153	Detection fixed reloc	0.811
2020	4	2	7	0	8.117	38.0306	22.9651	6.84	-0.2	2	2020-04-02-07-00-08	2020-04-03-09-15-41	2	1	4	98	106	120	132	Detection fixed reloc	0.604
2020	4	2	10	29	27.765	38.0345	22.9682	6.63	-0.3	2	2020-04-02-10-29-27	2020-04-05-02-42-13	2	1	4	98	106	120	129	Detection fixed reloc	0.835
2020	4	2	19	54	43.651	38.0606	22.9378	6.92	0.4	2	2020-04-02-19-54-43	2020-05-14-11-05-17	2	2	24	26	95	109	117	Detection fixed reloc	0.674
2020	4	3	4	41	21.196	38.0525	22.9061	11.36	-0.1	2	2020-04-03-04-41-21	2020-04-28-02-43-29	18	2	27	29	31	36	41	Detection fixed reloc	0.627
2020	4	3	5	7	55.864	38.1906	22.7384	21.96	1.6	1	2020-04-03-05-07-55	2020-04-03-05-07-55	76	6	104	115	125	140	154	Template reloc	1
2020	4	3	5	13	38.62	38.0769	22.9218	6.71	-0.1	2	2020-04-03-05-13-38	2020-05-19-23-34-33	2	2	52	57	61	67	73	Detection fixed reloc	0.624
2020	4	3	9	15	53.547	38.0306	22.9651	6.84	2	1	2020-04-03-09-15-41	2020-04-03-09-15-41	2	1	4	98	106	120	132	Template reloc	1
2020	4	3	9	20	40.593	38.0249	22.9602	6.75	-0.9	2	2020-04-03-09-20-40	2020-04-03-09-36-54	2	1	4	98	106	120	132	Detection fixed reloc	0.788
2020	4	3	9	36	52.423	38.0249	22.9602	6.75	1.6	1	2020-04-03-09-36-54	2020-04-03-09-36-54	2	1	4	98	106	120	132	Template reloc	1
2020	4	3	9	47	39.945	38.0345	22.9682	6.63	-0.3	2	2020-04-03-09-47-39	2020-04-05-02-42-13	2	1	4	98	106	120	129	Detection fixed reloc	0.829
2020	4	3	10	37	27.613	38.0249	22.9602	6.75	-1.2	2	2020-04-03-10-37-27	2020-04-03-09-36-54	2	1	4	98	106	120	132	Detection fixed reloc	0.749
2020	4	3	11	31	11.953	38.0249	22.9602	6.75	-0.8	2	2020-04-03-11-31-11	2020-04-03-09-36-54	2	1	4	98	106	120	132	Detection fixed reloc	0.793
2020	4	3	11	38	34.437	38.0306	22.9651	6.84	-0.9	2	2020-04-03-11-38-34	2020-04-03-09-15-41	2	1	4	98	106	120	132	Detection fixed reloc	0.739
2020	4	3	12	19	31.881	38.0427	22.9601	6.21	-0.4	2	2020-04-03-12-19-31	2020-04-04-01-45-18	2	1	4	98	106	141	155	Detection fixed reloc	0.781
2020	4	3	12	55	52.461	38.0427	22.9601	6.21	-1	2	2020-04-03-12-55-52	2020-04-04-01-45-18	2	1	4	98	106	141	155	Detection fixed reloc	0.68
2020	4	3	13	31	27.845	38.0591	22.9326	6.56	-0.5	2	2020-04-03-13-31-27	2020-07-06-20-38-19	2	2	101	112	122	137	151	Detection fixed reloc	0.674
2020	4	3	15	16	9.717	38.0306	22.9651	6.84	-0.8	2	2020-04-03-15-16-09	2020-04-03-09-15-41	2	1	4	98	106	120	132	Detection fixed reloc	0.859
2020	4	3	16	45	2.556	38.0525	22.9061	11.36	0	2	2020-04-03-16-45-02	2020-04-28-02-43-29	18	2	27	29	31	36	41	Detection fixed reloc	0.656
2020	4	3	16	46	38.907	38.0723	22.9323	8.1	-0.2	2	2020-04-03-16-46-38	2020-05-24-02-51-46	2	2	52	57	61	67	73	Detection fixed reloc	0.771
2020	4	3	18	19	45.217	38.0306	22.9651	6.84	0.5	2	2020-04-03-18-19-45	2020-04-03-09-15-41	2	1	4	98	106	120	132	Detection fixed reloc	0.855
2020	4	3	20	30	34.125	38.0345	22.9682	6.63	-0.5	2	2020-04-03-20-30-34	2020-04-05-02-42-13	2	1	4	98	106	120	129	Detection fixed reloc	0.9
2020	4	3	21	2	26.397	38.0306	22.9651	6.84	-0.5	2	2020-04-03-21-02-26	2020-04-03-09-15-41	2	1	4	98	106	120	132	Detection fixed reloc	0.627
2020	4	3	22	23	8.297	38.0306	22.9651	6.84	-0.2	2	2020-04-03-22-23-08	2020-04-03-09-15-41	2	1	4	98	106	120	132	Detection fixed reloc	0.871
2020	4	4	1	45	17.501	38.0427	22.9601	6.21	1.4	1	2020-04-04-01-45-18	2020-04-04-01-45-18	2	1	4	98	106	141	155	Template reloc	1
2020	4	4	1	51	3.413	38.0249	22.9602	6.75	0.1	2	2020-04-04-01-51-03	2020-04-03-09-36-54	2	1	4	98	106	120	132	Detection fixed reloc	0.823
2020	4	4	1	51	12.361	38.0427	22.9601	6.21	-0.4	2	2020-04-04-01-51-12	2020-04-04-01-45-18	2	1	4	98	106	141	155	Detection fixed reloc	0.933
2020	4	4	2	2	55.673	38.0249	22.9602	6.75	-1.1	2	2020-04-04-02-02-55	2020-04-03-09-36-54	2	1	4	98	106	120	132	Detection fixed reloc	0.745
2020	4	4	4	26	49.24	38.0769	22.9218	6.71	0	2	2020-04-04-04-26-49	2020-05-19-23-34-33	2	2	52	57	61	67	73	Detection fixed reloc	0.789
2020	4	4	4	39	20.337	38.0306	22.9651	6.84	-0.6	2	2020-04-04-04-39-20	2020-04-03-09-15-41	2	1	4	98	106	120	132	Detection fixed reloc	0.806
2020	4	4	5	29	13.385	38.0345	22.9682	6.63	-0.7	2	2020-04-04-05-29-13	2020-04-05-02-42-13	2	1	4	98	106	120	129	Detection fixed reloc	0.734
2020	4	4	7	1	30.041	38.0427	22.9601	6.21	-0.9	2	2020-04-04-07-01-30	2020-04-04-01-45-18	2	1	4	98	106	141	155	Detection fixed reloc	0.808
2020	4	4	7	8	45.425	38.0345	22.9682	6.63	0.6	2	2020-04-04-07-08-45	2020-04-05-02-42-13	2	1	4	98	106	120	129	Detection fixed reloc	0.914
2020	4	4	7	19	54.785	38.0345	22.9682	6.63	-0.3	2	2020-04-04-07-19-54	2020-04-05-02-42-13	2	1	4	98	106	120	129	Detection fixed reloc	0.865
2020	4	4	7	39	50.425	38.0345	22.9682	6.63	-0.2	2	2020-04-04-07-39-50	2020-04-05-02-42-13	2	1	4	98	106	120	129	Detection fixed reloc	0.713
2020	4	4	9	51	4.211	38.0567	22.8827	13.13	0.1	2	2020-04-04-09-51-04	2020-07-22-19-28-57	4	3	8	8	8	8	8	Detection fixed reloc	0.829
2020	4	4	10	52	31.765	38.0345	22.9682	6.63	0	2	2020-04-04-10-52-31	2020-04-05-02-42-13	2	1	4	98	106	120	129	Detection fixed reloc	0.622
2020	4	4	10	58	52.905	38.0345	22.9682	6.63	0.3	2	2020-04-04-10-58-52	2020-04-05-02-42-13	2	1	4	98	106	120	129	Detection fixed reloc	0.849
2020	4	4	11	18	7.845	38.0345	22.9682	6.63	-0.5	2	2020-04-04-11-18-07	2020-04-05-02-42-13	2	1	4	98	106	120	129	Detection fixed reloc	0.813
2020	4	4	11	19	55.705	38.0345	22.9682	6.63	-0.6	2	2020-04-04-11-19-55	2020-04-05-02-42-13	2	1	4	98	106	120	129	Detection fixed reloc	0.835
2020	4	4	16	41	9.361	38.0427	22.9601	6.21	1.7	2	2020-04-04-16-41-09	2020-04-04-01-45-18	2	1	4	98	106	141	155	Detection fixed reloc	0.932
2020	4	4	16	44	47.865	38.0345	22.9682	6.63	-0.2	2	2020-04-04-16-44-47	2020-04-05-02-42-13	2	1	4	98	106	120	129	Detection fixed reloc	0.638
2020	4	4	17	5	3.241	38.0427	22.9601	6.21	-0.9	2	2020-04-04-17-05-03	2020-04-04-01-45-18	2	1	4	98	106	141	155	Detection fixed reloc	0.726
2020	4	4	17	5	17.985	38.0345	22.9682	6.63	-0.7	2	2020-04-04-17-05-17	2020-04-05-02-42-13	2	1	4	98	106	120	129	Detection fixed reloc	0.76
2020	4	4	17	29	7.967	38.0272	22.9624	8.06	0.2	2	2020-04-04-17-29-07	2020-03-20-01-36-14	2	1	4	4	4	4	4	Detection fixed reloc	0.622
2020	4	4	17	51	17.993	38.0249	22.9602	6.75	-0.8	2	2020-04-04-17-51-17	2020-04-03-09-36-54	2	1	4	98	106	120	132	Detection fixed reloc	0.73
2020	4	4	18	6	11.405	38.0345	22.9682	6.63	-0.1	2	2020-04-04-18-06-11	2020-04-05-02-42-13	2	1	4	98	106	120	129	Detection fixed reloc	0.664
2020	4	4	21	40	2.545	38.0345	22.9682	6.63	0.2	2	2020-04-04-21-40-02	2020-04-05-02-42-13	2	1	4	98	106	120	129	Detection fixed reloc	0.923
2020	4	4	22	18	12.761	38.0427	22.9601	6.21	-0.3	2	2020-04-04-22-18-12	2020-04-04-01-45-18	2	1	4	98	106	141	155	Detection fixed reloc	0.762
2020	4	5	0	11	51.705	38.0345	22.9682	6.63	-0.5	2	2020-04-05-00-11-51	2020-04-05-02-42-13	2	1	4	98	106	120	129	Detection fixed reloc	0.901
2020	4	5	2	42	12.695	38.0345	22.9682	6.63	2.3	1	2020-04-05-02-42-13	2020-04-05-02-42-13	2	1	4	98	106	120	129	Template reloc	1
2020	4	5	2	43	47.845	38.0345	22.9682	6.63	-0.5	2	2020-04-05-02-43-47	2020-04-05-02-42-13	2	1	4	98	106	120	129	Detection fixed reloc	0.773
2020	4	5	2	48	36.465	38.0345	22.9682	6.63	1	2	2020-04-05-02-48-36	2020-04-05-02-42-13	2	1	4	98	106	120	129	Detection fixed reloc	0.844
2020	4	5	2	52	58.937	38.0306	22.9651	6.84	-0.5	2	2020-04-05-02-52-58	2020-04-03-09-15-41	2	1	4	98	106	120	132	Detection fixed reloc	0.63
2020	4	5	3	18	57.785	38.0345	22.9682	6.63	0.6	2	2020-04-05-03-18-57	2020-04-05-02-42-13	2	1	4	98	106	120	129	Detection fixed reloc	0.888
2020	4	5	3	19	20.165	38.0345	22.9682	6.63	-0.6	2	2020-04-05-03-19-20	2020-04-05-02-42-13	2	1	4	98	106	120	129	Detection fixed reloc	0.906
2020	4	5	3	24	36.807	38.0272	22.9624	8.06	0	2	2020-04-05-03-24-36	2020-03-20-01-36-14	2	1	4	4	4	4	4	Detection fixed reloc	0.619
2020	4	5	3	29	8.697	38.0306	22.9651	6.84	1.1	2	2020-04-05-03-29-08	2020-04-03-09-15-41	2	1	4	98	106	120	132	Detection fixed reloc	0.842
2020	4	5	3	39	57.865	38.0345	22.9682	6.63	-0.4	2	2020-04-05-03-39-57	2020-04-05-02-42-13	2	1	4	98	106	120	129	Detection fixed reloc	0.837
2020	4	5	3	41	59.017	38.0306	22.9651	6.84	-0.6	2	2020-04-05-03-41-59	2020-04-03-09-15-41	2	1	4	98	106	120	132	Detection fixed reloc	0.69
2020	4	5	3	52	58.961	38.0427	22.9601	6.21	-0.1	2	2020-04-05-03-52-58	2020-04-04-01-45-18	2	1	4	98	106	141	155	Detection fixed reloc	0.961
2020	4	5	3	53	27.093	38.0249	22.9602	6.75	-0.2	2	2020-04-05-03-53-27	2020-04-03-09-36-54	2	1	4	98	106	120	132	Detection fixed reloc	0.873
2020	4	5	4	47	23.685	38.034	22.9858	5.99	0.5	2	2020-04-05-04-47-23	2020-04-09-20-45-49	2	1	105	116	126	142	156	Detection fixed reloc	0.616
2020	4	5	5	53	57.633	38.0249	22.9602	6.75	-0.9	2	2020-04-05-05-53-57	2020-04-03-09-36-54	2	1	4	98	106	120	132	Detection fixed reloc	0.794
2020	4	5	6	34	47.825	38.0345	22.9682	6.63	0	2	2020-04-05-06-34-47	2020-04-05-02-42-13	2	1	4	98	106	120	129	Detection fixed reloc	0.635
2020	4	5	8	17	19.621	38.0427	22.9601	6.21	-0.4	2	2020-04-05-08-17-19	2020-04-04-01-45-18	2	1	4	98	106	141	155	Detection fixed reloc	0.696
2020	4	5	13	12	57.876	38.1979	22.5602	29.13	1.6	1	2020-04-05-13-12-57	2020-04-05-13-12-57	77	10	106	117	127	143	157	Template reloc	1
2020	4	5	17	27	45.597	38.0306	22.9651	6.84	-0.3	2	2020-04-05-17-27-45	2020-04-03-09-15-41	2	1	4	98	106	120	132	Detection fixed reloc	0.68
2020	4	5	19	7	14.105	38.034	22.9858	5.99	0.5	2	2020-04-05-19-07-14	2020-04-09-20-45-49	2	1	105	116	126	142	156	Detection fixed reloc	0.664
2020	4	6	3	47	29.967	38.0272	22.9624	8.06	0.3	2	2020-04-06-03-47-29	2020-03-20-01-36-14	2	1	4	4	4	4	4	Detection fixed reloc	0.683
2020	4	6	4	19	50.325	38.0345	22.9682	6.63	0	2	2020-04-06-04-19-50	2020-04-05-02-42-13	2	1	4	98	106	120	129	Detection fixed reloc	0.846
2020	4	6	5	56	56.569	38.0635	22.8732	6.93	0.8	2	2020-04-06-05-56-56	2020-02-24-13-55-20	10	2	15	16	17	19	23	Detection fixed reloc	0.616
2020	4	6	6	46	9.061	38.1472	22.9618	13.11	0.5	2	2020-04-06-06-46-09	2020-03-07-12-55-08	2	2	80	85	92	106	114	Detection fixed reloc	0.612
2020	4	6	14	43	58.756	38.0525	22.9061	11.36	0.1	2	2020-04-06-14-43-58	2020-04-28-02-43-29	18	2	27	29	31	36	41	Detection fixed reloc	0.735
2020	4	6	18	4	53.416	38.0525	22.9061	11.36	-0.1	2	2020-04-06-18-04-53	2020-04-28-02-43-29	18	2	27	29	31	36	41	Detection fixed reloc	0.607
2020	4	6	19	40	49.516	38.0525	22.9061	11.36	0.1	2	2020-04-06-19-40-49	2020-04-28-02-43-29	18	2	27	29	31	36	41	Detection fixed reloc	0.754
2020	4	6	21	44	0.0849991	38.0345	22.9682	6.63	0.9	2	2020-04-06-21-44-00	2020-04-05-02-42-13	2	1	4	98	106	120	129	Detection fixed reloc	0.64
2020	4	7	8	43	57.367	38.0272	22.9624	8.06	0.8	2	2020-04-07-08-43-57	2020-03-20-01-36-14	2	1	4	4	4	4	4	Detection fixed reloc	0.728
2020	4	7	9	21	5.096	38.0525	22.9061	11.36	0.2	2	2020-04-07-09-21-05	2020-04-28-02-43-29	18	2	27	29	31	36	41	Detection fixed reloc	0.694
2020	4	7	11	18	23.24	38.0769	22.9218	6.71	0.3	2	2020-04-07-11-18-23	2020-05-19-23-34-33	2	2	52	57	61	67	73	Detection fixed reloc	0.717
2020	4	7	11	52	11.153	38.0249	22.9602	6.75	-0.4	2	2020-04-07-11-52-11	2020-04-03-09-36-54	2	1	4	98	106	120	132	Detection fixed reloc	0.659
2020	4	7	22	1	19.05	38.0374	22.9603	6.56	-0.8	2	2020-04-07-22-01-19	2020-04-13-13-58-38	2	1	95	104	128	144	158	Detection fixed reloc	0.794
2020	4	7	22	15	30.685	38.034	22.9858	5.99	0.9	2	2020-04-07-22-15-30	2020-04-09-20-45-49	2	1	105	116	126	142	156	Detection fixed reloc	0.607
2020	4	8	0	34	52.285	38.0345	22.9682	6.63	1	2	2020-04-08-00-34-52	2020-04-05-02-42-13	2	1	4	98	106	120	129	Detection fixed reloc	0.884
2020	4	8	11	38	38.745	38.034	22.9858	5.99	0.4	2	2020-04-08-11-38-38	2020-04-09-20-45-49	2	1	105	116	126	142	156	Detection fixed reloc	0.664
2020	4	8	13	7	6.645	38.0345	22.9682	6.63	0.2	2	2020-04-08-13-07-06	2020-04-05-02-42-13	2	1	4	98	106	120	129	Detection fixed reloc	0.815
2020	4	8	16	41	30.547	38.0272	22.9624	8.06	0.6	2	2020-04-08-16-41-30	2020-03-20-01-36-14	2	1	4	4	4	4	4	Detection fixed reloc	0.741
2020	4	8	18	35	42.771	38.0212	22.881	14.17	0.3	2	2020-04-08-18-35-42	2020-07-29-19-50-22	78	3	107	118	129	145	159	Detection fixed reloc	0.738
2020	4	8	23	12	3.667	38.0272	22.9624	8.06	0.1	2	2020-04-08-23-12-03	2020-03-20-01-36-14	2	1	4	4	4	4	4	Detection fixed reloc	0.731
2020	4	9	0	23	9.056	38.0525	22.9061	11.36	0.1	2	2020-04-09-00-23-09	2020-04-28-02-43-29	18	2	27	29	31	36	41	Detection fixed reloc	0.815
2020	4	9	5	57	53.336	38.0525	22.9061	11.36	0.1	2	2020-04-09-05-57-53	2020-04-28-02-43-29	18	2	27	29	31	36	41	Detection fixed reloc	0.668
2020	4	9	6	27	15.657	38.0175	22.9372	11.51	0.4	2	2020-04-09-06-27-15	2020-08-15-01-51-15	17	1	26	28	30	35	39	Detection fixed reloc	0.681
2020	4	9	8	26	53.137	38.0175	22.9372	11.51	0.3	2	2020-04-09-08-26-53	2020-08-15-01-51-15	17	1	26	28	30	35	39	Detection fixed reloc	0.646
2020	4	9	15	38	47.505	38.034	22.9858	5.99	0.2	2	2020-04-09-15-38-47	2020-04-09-20-45-49	2	1	105	116	126	142	156	Detection fixed reloc	0.678
2020	4	9	20	45	48.855	38.034	22.9858	5.99	1.8	1	2020-04-09-20-45-49	2020-04-09-20-45-49	2	1	105	116	126	142	156	Template reloc	1
2020	4	10	0	15	2.376	38.1762	22.7401	15.65	0.9	2	2020-04-10-00-15-02	2020-04-10-09-26-30	24	6	36	39	130	146	160	Detection fixed reloc	0.938
2020	4	10	7	47	17.325	38.034	22.9858	5.99	0.2	2	2020-04-10-07-47-17	2020-04-09-20-45-49	2	1	105	116	126	142	156	Detection fixed reloc	0.681
2020	4	10	8	28	59.705	38.034	22.9858	5.99	0.2	2	2020-04-10-08-28-59	2020-04-09-20-45-49	2	1	105	116	126	142	156	Detection fixed reloc	0.694
2020	4	10	9	26	31.006	38.1762	22.7401	15.65	1.6	1	2020-04-10-09-26-30	2020-04-10-09-26-30	24	6	36	39	130	146	160	Template reloc	1
2020	4	10	10	3	2.296	38.1762	22.7401	15.65	0.8	2	2020-04-10-10-03-02	2020-04-10-09-26-30	24	6	36	39	130	146	160	Detection fixed reloc	0.943
2020	4	10	11	32	46.276	38.1762	22.7401	15.65	0.4	2	2020-04-10-11-32-46	2020-04-10-09-26-30	24	6	36	39	130	146	160	Detection fixed reloc	0.633
2020	4	10	14	5	17.717	38.0306	22.9651	6.84	0	2	2020-04-10-14-05-17	2020-04-03-09-15-41	2	1	4	98	106	120	132	Detection fixed reloc	0.902
2020	4	10	16	6	18.493	38.0249	22.9602	6.75	-1.1	2	2020-04-10-16-06-18	2020-04-03-09-36-54	2	1	4	98	106	120	132	Detection fixed reloc	0.765
2020	4	10	16	13	9.825	38.0345	22.9682	6.63	-0.3	2	2020-04-10-16-13-09	2020-04-05-02-42-13	2	1	4	98	106	120	129	Detection fixed reloc	0.746
2020	4	10	17	58	7.25	38.0374	22.9603	6.56	-0.5	2	2020-04-10-17-58-07	2020-04-13-13-58-38	2	1	95	104	128	144	158	Detection fixed reloc	0.726
2020	4	10	19	59	43.23	38.0374	22.9603	6.56	-0.7	2	2020-04-10-19-59-43	2020-04-13-13-58-38	2	1	95	104	128	144	158	Detection fixed reloc	0.707
2020	4	10	20	44	47.945	38.0345	22.9682	6.63	-0.6	2	2020-04-10-20-44-47	2020-04-05-02-42-13	2	1	4	98	106	120	129	Detection fixed reloc	0.817
2020	4	10	23	54	51.01	38.0374	22.9603	6.56	-0.7	2	2020-04-10-23-54-51	2020-04-13-13-58-38	2	1	95	104	128	144	158	Detection fixed reloc	0.769
2020	4	11	1	5	46.284	38.0342	22.964	6.29	0.3	2	2020-04-11-01-05-46	2020-04-14-04-53-28	2	1	4	4	4	147	161	Detection fixed reloc	0.92
2020	4	11	2	15	41.365	38.0628	22.8281	11.67	0	2	2020-04-11-02-15-41	2020-04-27-00-02-17	54	3	76	81	87	104	112	Detection fixed reloc	0.685
2020	4	11	2	45	18.817	38.0306	22.9651	6.84	0.2	2	2020-04-11-02-45-18	2020-04-03-09-15-41	2	1	4	98	106	120	132	Detection fixed reloc	0.83
2020	4	11	3	59	45.517	38.0175	22.9372	11.51	-0.1	2	2020-04-11-03-59-45	2020-08-15-01-51-15	17	1	26	28	30	35	39	Detection fixed reloc	0.612
2020	4	11	4	52	21.333	38.0249	22.9602	6.75	-1.1	2	2020-04-11-04-52-21	2020-04-03-09-36-54	2	1	4	98	106	120	132	Detection fixed reloc	0.776
2020	4	11	5	50	49.647	38.0272	22.9624	8.06	0.7	2	2020-04-11-05-50-49	2020-03-20-01-36-14	2	1	4	4	4	4	4	Detection fixed reloc	0.643
2020	4	11	7	45	52.03	38.0374	22.9603	6.56	-1	2	2020-04-11-07-45-52	2020-04-13-13-58-38	2	1	95	104	128	144	158	Detection fixed reloc	0.67
2020	4	11	8	7	14.03	38.0374	22.9603	6.56	-0.6	2	2020-04-11-08-07-14	2020-04-13-13-58-38	2	1	95	104	128	144	158	Detection fixed reloc	0.931
2020	4	11	8	54	7.605	38.0345	22.9682	6.63	0.3	2	2020-04-11-08-54-07	2020-04-05-02-42-13	2	1	4	98	106	120	129	Detection fixed reloc	0.65
2020	4	11	9	35	27.373	38.0249	22.9602	6.75	-1.2	2	2020-04-11-09-35-27	2020-04-03-09-36-54	2	1	4	98	106	120	132	Detection fixed reloc	0.892
2020	4	11	10	2	14.57	38.0374	22.9603	6.56	-0.3	2	2020-04-11-10-02-14	2020-04-13-13-58-38	2	1	95	104	128	144	158	Detection fixed reloc	0.707
2020	4	11	10	26	49.976	38.0525	22.9061	11.36	0.4	2	2020-04-11-10-26-49	2020-04-28-02-43-29	18	2	27	29	31	36	41	Detection fixed reloc	0.89
2020	4	11	12	58	4.876	38.0525	22.9061	11.36	-0.2	2	2020-04-11-12-58-04	2020-04-28-02-43-29	18	2	27	29	31	36	41	Detection fixed reloc	0.709
2020	4	11	14	8	6.23	38.0374	22.9603	6.56	-0.7	2	2020-04-11-14-08-06	2020-04-13-13-58-38	2	1	95	104	128	144	158	Detection fixed reloc	0.84
2020	4	11	18	14	47.82	38.0405	22.8332	12.87	0.7	2	2020-04-11-18-14-47	2020-03-05-21-01-37	54	5	76	81	87	100	108	Detection fixed reloc	0.616
2020	4	11	20	43	44.153	38.0249	22.9602	6.75	-0.4	2	2020-04-11-20-43-44	2020-04-03-09-36-54	2	1	4	98	106	120	132	Detection fixed reloc	0.656
2020	4	11	21	24	0.379997	38.1722	22.5698	7.76	1	1	2020-04-11-21-24-00	2020-04-11-21-24-00	79	10	108	119	131	148	162	Template reloc	1
2020	4	11	22	34	41.062	38.0767	22.8777	9.97	-0.1	2	2020-04-11-22-34-41	2021-05-28-18-54-24	41	3	59	64	69	78	84	Detection fixed reloc	0.669
2020	4	11	23	19	34.504	38.0342	22.964	6.29	-0.6	2	2020-04-11-23-19-34	2020-04-14-04-53-28	2	1	4	4	4	147	161	Detection fixed reloc	0.699
2020	4	11	23	50	32.545	38.034	22.9858	5.99	0.8	2	2020-04-11-23-50-32	2020-04-09-20-45-49	2	1	105	116	126	142	156	Detection fixed reloc	0.692
2020	4	12	1	52	27.607	38.0272	22.9624	8.06	0	2	2020-04-12-01-52-27	2020-03-20-01-36-14	2	1	4	4	4	4	4	Detection fixed reloc	0.788
2020	4	12	2	6	0.147003	38.0272	22.9624	8.06	0.5	2	2020-04-12-02-06-00	2020-03-20-01-36-14	2	1	4	4	4	4	4	Detection fixed reloc	0.735
2020	4	12	2	22	27.15	38.0374	22.9603	6.56	-0.8	2	2020-04-12-02-22-27	2020-04-13-13-58-38	2	1	95	104	128	144	158	Detection fixed reloc	0.756
2020	4	12	3	3	59.096	38.0525	22.9061	11.36	0.2	2	2020-04-12-03-03-59	2020-04-28-02-43-29	18	2	27	29	31	36	41	Detection fixed reloc	0.668
2020	4	12	3	17	33.416	38.0525	22.9061	11.36	-0.1	2	2020-04-12-03-17-33	2020-04-28-02-43-29	18	2	27	29	31	36	41	Detection fixed reloc	0.673
2020	4	12	3	49	5.505	38.034	22.9858	5.99	0.5	2	2020-04-12-03-49-05	2020-04-09-20-45-49	2	1	105	116	126	142	156	Detection fixed reloc	0.658
2020	4	12	4	45	18.527	38.0723	22.9323	8.1	-0.3	2	2020-04-12-04-45-18	2020-05-24-02-51-46	2	2	52	57	61	67	73	Detection fixed reloc	0.607
2020	4	12	4	57	2.747	38.0272	22.9624	8.06	0	2	2020-04-12-04-57-02	2020-03-20-01-36-14	2	1	4	4	4	4	4	Detection fixed reloc	0.706
2020	4	12	5	21	8.867	38.0272	22.9624	8.06	-0.1	2	2020-04-12-05-21-08	2020-03-20-01-36-14	2	1	4	4	4	4	4	Detection fixed reloc	0.682
2020	4	12	7	21	42.55	38.0374	22.9603	6.56	-0.7	2	2020-04-12-07-21-42	2020-04-13-13-58-38	2	1	95	104	128	144	158	Detection fixed reloc	0.789
2020	4	12	7	44	24.801	38.0427	22.9601	6.21	-0.8	2	2020-04-12-07-44-24	2020-04-04-01-45-18	2	1	4	98	106	141	155	Detection fixed reloc	0.881
2020	4	12	7	46	15.165	38.034	22.9858	5.99	0	2	2020-04-12-07-46-15	2020-04-09-20-45-49	2	1	105	116	126	142	156	Detection fixed reloc	0.604
2020	4	12	8	11	12.227	38.0272	22.9624	8.06	0.2	2	2020-04-12-08-11-12	2020-03-20-01-36-14	2	1	4	4	4	4	4	Detection fixed reloc	0.678
2020	4	12	8	32	11.467	38.0272	22.9624	8.06	0.2	2	2020-04-12-08-32-11	2020-03-20-01-36-14	2	1	4	4	4	4	4	Detection fixed reloc	0.62
2020	4	12	10	33	26.247	38.0272	22.9624	8.06	0.3	2	2020-04-12-10-33-26	2020-03-20-01-36-14	2	1	4	4	4	4	4	Detection fixed reloc	0.631
2020	4	12	11	30	9.389	38.1533	22.6447	19.97	1.6	1	2020-04-12-11-30-02	2020-04-12-11-30-02	2	9	4	4	4	4	163	Template loc	1
2020	4	12	11	30	20.467	38.0272	22.9624	8.06	1.4	2	2020-04-12-11-30-20	2020-03-20-01-36-14	2	1	4	4	4	4	4	Detection fixed reloc	0.729
2020	4	12	11	47	46.824	38.0342	22.964	6.29	-0.8	2	2020-04-12-11-47-46	2020-04-14-04-53-28	2	1	4	4	4	147	161	Detection fixed reloc	0.772
2020	4	12	12	2	37.21	38.0499	22.9741	7.97	3.2	1	2020-04-12-12-02-38	2020-04-12-12-02-38	2	1	4	4	4	4	164	Template reloc	1
2020	4	12	12	4	6.227	38.0272	22.9624	8.06	0.6	2	2020-04-12-12-04-06	2020-03-20-01-36-14	2	1	4	4	4	4	4	Detection fixed reloc	0.814
2020	4	12	12	20	7.256	38.0525	22.9061	11.36	-0.2	2	2020-04-12-12-20-07	2020-04-28-02-43-29	18	2	27	29	31	36	41	Detection fixed reloc	0.621
2020	4	12	12	28	25.69	38.0374	22.9603	6.56	-0.2	2	2020-04-12-12-28-25	2020-04-13-13-58-38	2	1	95	104	128	144	158	Detection fixed reloc	0.725
2020	4	12	12	28	45.247	38.0272	22.9624	8.06	0.1	2	2020-04-12-12-28-45	2020-03-20-01-36-14	2	1	4	4	4	4	4	Detection fixed reloc	0.769
2020	4	12	12	42	37.527	38.0272	22.9624	8.06	1.2	2	2020-04-12-12-42-37	2020-03-20-01-36-14	2	1	4	4	4	4	4	Detection fixed reloc	0.637
2020	4	12	13	14	17.365	38.034	22.9858	5.99	-0.1	2	2020-04-12-13-14-17	2020-04-09-20-45-49	2	1	105	116	126	142	156	Detection fixed reloc	0.671
2020	4	12	14	3	43.087	38.0723	22.9323	8.1	-0.1	2	2020-04-12-14-03-43	2020-05-24-02-51-46	2	2	52	57	61	67	73	Detection fixed reloc	0.622
2020	4	12	14	8	31.407	38.0272	22.9624	8.06	0.2	2	2020-04-12-14-08-31	2020-03-20-01-36-14	2	1	4	4	4	4	4	Detection fixed reloc	0.647
2020	4	12	14	25	27.847	38.0272	22.9624	8.06	0.5	2	2020-04-12-14-25-27	2020-03-20-01-36-14	2	1	4	4	4	4	4	Detection fixed reloc	0.601
2020	4	12	15	28	43.01	38.0214	23.0079	4.97	1.3	1	2020-04-12-15-28-43	2020-04-12-15-28-43	2	1	95	104	112	126	137	Template reloc	1
2020	4	12	15	39	49.845	38.034	22.9858	5.99	1.3	2	2020-04-12-15-39-49	2020-04-09-20-45-49	2	1	105	116	126	142	156	Detection fixed reloc	0.625
2020	4	12	16	2	34.157	38.0306	22.9651	6.84	-0.1	2	2020-04-12-16-02-34	2020-04-03-09-15-41	2	1	4	98	106	120	132	Detection fixed reloc	0.649
2020	4	12	17	57	4.997	38.0306	22.9651	6.84	-0.9	2	2020-04-12-17-57-04	2020-04-03-09-15-41	2	1	4	98	106	120	132	Detection fixed reloc	0.727
2020	4	12	18	18	18.285	38.0345	22.9682	6.63	0.9	2	2020-04-12-18-18-18	2020-04-05-02-42-13	2	1	4	98	106	120	129	Detection fixed reloc	0.635
2020	4	12	18	21	52.757	38.0306	22.9651	6.84	-0.8	2	2020-04-12-18-21-52	2020-04-03-09-15-41	2	1	4	98	106	120	132	Detection fixed reloc	0.871
2020	4	12	18	23	40.561	38.0427	22.9601	6.21	-0.8	2	2020-04-12-18-23-40	2020-04-04-01-45-18	2	1	4	98	106	141	155	Detection fixed reloc	0.695
2020	4	12	18	41	40.736	38.0525	22.9061	11.36	-0.4	2	2020-04-12-18-41-40	2020-04-28-02-43-29	18	2	27	29	31	36	41	Detection fixed reloc	0.909
2020	4	12	19	14	12.887	38.0272	22.9624	8.06	0.3	2	2020-04-12-19-14-12	2020-03-20-01-36-14	2	1	4	4	4	4	4	Detection fixed reloc	0.652
2020	4	12	20	21	45.725	38.034	22.9858	5.99	0.2	2	2020-04-12-20-21-45	2020-04-09-20-45-49	2	1	105	116	126	142	156	Detection fixed reloc	0.841
2020	4	12	20	45	15.816	38.0525	22.9061	11.36	-0.1	2	2020-04-12-20-45-15	2020-04-28-02-43-29	18	2	27	29	31	36	41	Detection fixed reloc	0.649
2020	4	12	20	56	3.521	38.0427	22.9601	6.21	-0.7	2	2020-04-12-20-56-03	2020-04-04-01-45-18	2	1	4	98	106	141	155	Detection fixed reloc	0.87
2020	4	12	23	16	53.187	38.0272	22.9624	8.06	0.1	2	2020-04-12-23-16-53	2020-03-20-01-36-14	2	1	4	4	4	4	4	Detection fixed reloc	0.67
2020	4	12	23	23	47.267	38.0272	22.9624	8.06	0.3	2	2020-04-12-23-23-47	2020-03-20-01-36-14	2	1	4	4	4	4	4	Detection fixed reloc	0.668
2020	4	12	23	39	38.397	38.0306	22.9651	6.84	0	2	2020-04-12-23-39-38	2020-04-03-09-15-41	2	1	4	98	106	120	132	Detection fixed reloc	0.625
2020	4	13	1	1	39.565	38.034	22.9858	5.99	0.6	2	2020-04-13-01-01-39	2020-04-09-20-45-49	2	1	105	116	126	142	156	Detection fixed reloc	0.695
2020	4	13	3	0	44.297	38.2429	22.7226	19.26	0.6	2	2020-04-13-03-00-44	2020-04-16-05-20-49	22	7	32	35	38	72	78	Detection fixed reloc	0.62
2020	4	13	3	47	0.128998	38.0632	22.9297	7.05	-0.4	2	2020-04-13-03-47-00	2020-05-15-15-41-15	2	2	24	26	28	32	36	Detection fixed reloc	0.622
2020	4	13	4	28	36.057	38.0175	22.9372	11.51	-0.1	2	2020-04-13-04-28-36	2020-08-15-01-51-15	17	1	26	28	30	35	39	Detection fixed reloc	0.628
2020	4	13	5	20	41.116	38.0525	22.9061	11.36	-0.1	2	2020-04-13-05-20-41	2020-04-28-02-43-29	18	2	27	29	31	36	41	Detection fixed reloc	0.637
2020	4	13	6	16	0.345001	38.034	22.9858	5.99	0.5	2	2020-04-13-06-16-00	2020-04-09-20-45-49	2	1	105	116	126	142	156	Detection fixed reloc	0.629
2020	4	13	8	35	12.329	38.1961	22.7434	2.4	1.3	2	2020-04-13-08-35-12	2021-03-17-07-44-25	40	6	81	86	93	107	115	Detection fixed reloc	0.603
2020	4	13	8	59	17.937	38.2429	22.7226	19.26	0.7	2	2020-04-13-08-59-17	2020-04-16-05-20-49	22	7	32	35	38	72	78	Detection fixed reloc	0.709
2020	4	13	10	15	29.053	38.0249	22.9602	6.75	-0.1	2	2020-04-13-10-15-29	2020-04-03-09-36-54	2	1	4	98	106	120	132	Detection fixed reloc	0.668
2020	4	13	10	50	27.129	38.0632	22.9297	7.05	0.7	2	2020-04-13-10-50-27	2020-05-15-15-41-15	2	2	24	26	28	32	36	Detection fixed reloc	0.643
2020	4	13	12	39	37.03	38.0374	22.9603	6.56	1.2	2	2020-04-13-12-39-37	2020-04-13-13-58-38	2	1	95	104	128	144	158	Detection fixed reloc	0.89
2020	4	13	12	46	59.745	38.034	22.9858	5.99	0.5	2	2020-04-13-12-46-59	2020-04-09-20-45-49	2	1	105	116	126	142	156	Detection fixed reloc	0.6
2020	4	13	13	31	8.401	38.0427	22.9601	6.21	-0.3	2	2020-04-13-13-31-08	2020-04-04-01-45-18	2	1	4	98	106	141	155	Detection fixed reloc	0.934
2020	4	13	13	58	36.67	38.0374	22.9603	6.56	1.8	1	2020-04-13-13-58-38	2020-04-13-13-58-38	2	1	95	104	128	144	158	Template reloc	1
2020	4	13	14	45	16.636	38.0525	22.9061	11.36	-0.1	2	2020-04-13-14-45-16	2020-04-28-02-43-29	18	2	27	29	31	36	41	Detection fixed reloc	0.766
2020	4	13	16	47	23.956	38.0525	22.9061	11.36	0.1	2	2020-04-13-16-47-23	2020-04-28-02-43-29	18	2	27	29	31	36	41	Detection fixed reloc	0.974
2020	4	14	1	21	10.305	38.034	22.9858	5.99	0.2	2	2020-04-14-01-21-10	2020-04-09-20-45-49	2	1	105	116	126	142	156	Detection fixed reloc	0.62
2020	4	14	1	56	13.663	38.0085	22.9701	5.51	-0.5	2	2020-04-14-01-56-13	2020-04-21-03-28-13	2	1	4	4	4	147	161	Detection fixed reloc	0.672
2020	4	14	2	7	10.61	38.0374	22.9603	6.56	-0.6	2	2020-04-14-02-07-10	2020-04-13-13-58-38	2	1	95	104	128	144	158	Detection fixed reloc	0.73
2020	4	14	3	31	7.185	38.034	22.9858	5.99	0.5	2	2020-04-14-03-31-07	2020-04-09-20-45-49	2	1	105	116	126	142	156	Detection fixed reloc	0.607
2020	4	14	4	38	23.01	38.0298	22.9808	6.68	3.2	1	2020-04-14-04-38-24	2020-04-14-04-38-24	2	1	4	98	106	149	165	Template reloc	1
2020	4	14	4	41	7.357	38.0306	22.9651	6.84	0.3	2	2020-04-14-04-41-07	2020-04-03-09-15-41	2	1	4	98	106	120	132	Detection fixed reloc	0.793
2020	4	14	4	41	49.437	38.0306	22.9651	6.84	-0.4	2	2020-04-14-04-41-49	2020-04-03-09-15-41	2	1	4	98	106	120	132	Detection fixed reloc	0.603
2020	4	14	4	45	11.941	38.0427	22.9601	6.21	-0.3	2	2020-04-14-04-45-11	2020-04-04-01-45-18	2	1	4	98	106	141	155	Detection fixed reloc	0.834
2020	4	14	4	49	12.545	38.0345	22.9682	6.63	-0.3	2	2020-04-14-04-49-12	2020-04-05-02-42-13	2	1	4	98	106	120	129	Detection fixed reloc	0.819
2020	4	14	4	53	28.114	38.0342	22.964	6.29	1.6	1	2020-04-14-04-53-28	2020-04-14-04-53-28	2	1	4	4	4	147	161	Template reloc	1
2020	4	14	5	0	39.261	38.0427	22.9601	6.21	0.2	2	2020-04-14-05-00-39	2020-04-04-01-45-18	2	1	4	98	106	141	155	Detection fixed reloc	0.835
2020	4	14	5	2	48.385	38.0345	22.9682	6.63	0.6	2	2020-04-14-05-02-48	2020-04-05-02-42-13	2	1	4	98	106	120	129	Detection fixed reloc	0.861
2020	4	14	5	16	6.545	38.0345	22.9682	6.63	-0.1	2	2020-04-14-05-16-06	2020-04-05-02-42-13	2	1	4	98	106	120	129	Detection fixed reloc	0.698
2020	4	14	5	27	43.424	38.0342	22.964	6.29	-0.4	2	2020-04-14-05-27-43	2020-04-14-04-53-28	2	1	4	4	4	147	161	Detection fixed reloc	0.84
2020	4	14	5	35	47.816	38.0525	22.9061	11.36	-0.3	2	2020-04-14-05-35-47	2020-04-28-02-43-29	18	2	27	29	31	36	41	Detection fixed reloc	0.709
2020	4	14	5	40	44.241	38.0427	22.9601	6.21	-0.1	2	2020-04-14-05-40-44	2020-04-04-01-45-18	2	1	4	98	106	141	155	Detection fixed reloc	0.681
2020	4	14	5	52	1.145	38.0345	22.9682	6.63	-0.1	2	2020-04-14-05-52-01	2020-04-05-02-42-13	2	1	4	98	106	120	129	Detection fixed reloc	0.65
2020	4	14	6	18	0.413002	38.0898	22.8371	12.08	0.7	2	2020-04-14-06-18-00	2021-01-20-10-41-41	5	4	11	100	108	122	131	Detection fixed reloc	0.694
2020	4	14	6	19	5.83	38.0374	22.9603	6.56	-0.3	2	2020-04-14-06-19-05	2020-04-13-13-58-38	2	1	95	104	128	144	158	Detection fixed reloc	0.66
2020	4	14	6	21	44.601	38.0395	22.8088	15.01	0.1	2	2020-04-14-06-21-44	2020-09-28-13-56-04	5	5	11	100	108	150	166	Detection fixed reloc	0.793
2020	4	14	6	31	50.585	38.0345	22.9682	6.63	0.6	2	2020-04-14-06-31-50	2020-04-05-02-42-13	2	1	4	98	106	120	129	Detection fixed reloc	0.791
2020	4	14	6	37	56.453	38.0249	22.9602	6.75	-0.5	2	2020-04-14-06-37-56	2020-04-03-09-36-54	2	1	4	98	106	120	132	Detection fixed reloc	0.736
2020	4	14	6	43	52.843	38.0085	22.9701	5.51	0.1	2	2020-04-14-06-43-52	2020-04-21-03-28-13	2	1	4	4	4	147	161	Detection fixed reloc	0.951
2020	4	14	7	20	58.103	38.0085	22.9701	5.51	0.5	2	2020-04-14-07-20-58	2020-04-21-03-28-13	2	1	4	4	4	147	161	Detection fixed reloc	0.82
2020	4	14	7	27	58.165	38.0345	22.9682	6.63	-0.7	2	2020-04-14-07-27-58	2020-04-05-02-42-13	2	1	4	98	106	120	129	Detection fixed reloc	0.783
2020	4	14	8	27	20.993	38.0249	22.9602	6.75	-0.7	2	2020-04-14-08-27-20	2020-04-03-09-36-54	2	1	4	98	106	120	132	Detection fixed reloc	0.734
2020	4	14	8	29	17.005	38.034	22.9858	5.99	2.1	2	2020-04-14-08-29-17	2020-04-09-20-45-49	2	1	105	116	126	142	156	Detection fixed reloc	0.9
2020	4	14	8	35	26.365	38.034	22.9858	5.99	0.8	2	2020-04-14-08-35-26	2020-04-09-20-45-49	2	1	105	116	126	142	156	Detection fixed reloc	0.664
2020	4	14	8	41	22.143	38.0085	22.9701	5.51	-0.8	2	2020-04-14-08-41-22	2020-04-21-03-28-13	2	1	4	4	4	147	161	Detection fixed reloc	0.675
2020	4	14	8	41	59.965	38.034	22.9858	5.99	0.3	2	2020-04-14-08-41-59	2020-04-09-20-45-49	2	1	105	116	126	142	156	Detection fixed reloc	0.692
2020	4	14	9	26	12.205	38.034	22.9858	5.99	0.9	2	2020-04-14-09-26-12	2020-04-09-20-45-49	2	1	105	116	126	142	156	Detection fixed reloc	0.622
2020	4	14	10	0	31.617	38.0306	22.9651	6.84	-0.5	2	2020-04-14-10-00-31	2020-04-03-09-15-41	2	1	4	98	106	120	132	Detection fixed reloc	0.676
2020	4	14	10	6	42.257	38.1804	22.7336	15.89	1.2	2	2020-04-14-10-06-42	2021-03-06-13-20-01	40	6	58	63	68	77	83	Detection fixed reloc	0.615
2020	4	14	10	10	6.165	38.0345	22.9682	6.63	-0.6	2	2020-04-14-10-10-06	2020-04-05-02-42-13	2	1	4	98	106	120	129	Detection fixed reloc	0.712
2020	4	14	10	33	17.041	38.0427	22.9601	6.21	-0.2	2	2020-04-14-10-33-17	2020-04-04-01-45-18	2	1	4	98	106	141	155	Detection fixed reloc	0.8
2020	4	14	10	44	38.245	38.034	22.9858	5.99	0.4	2	2020-04-14-10-44-38	2020-04-09-20-45-49	2	1	105	116	126	142	156	Detection fixed reloc	0.606
2020	4	14	11	10	3.73	38.0374	22.9603	6.56	1	2	2020-04-14-11-10-03	2020-04-13-13-58-38	2	1	95	104	128	144	158	Detection fixed reloc	0.741
2020	4	14	14	47	45.373	38.0898	22.8371	12.08	1.4	2	2020-04-14-14-47-45	2021-01-20-10-41-41	5	4	11	100	108	122	131	Detection fixed reloc	0.758
2020	4	14	15	44	16.877	38.0306	22.9651	6.84	-0.3	2	2020-04-14-15-44-16	2020-04-03-09-15-41	2	1	4	98	106	120	132	Detection fixed reloc	0.677
2020	4	14	15	49	32.441	38.0427	22.9601	6.21	-0.5	2	2020-04-14-15-49-32	2020-04-04-01-45-18	2	1	4	98	106	141	155	Detection fixed reloc	0.667
2020	4	14	16	11	6.907	38.0272	22.9624	8.06	0	2	2020-04-14-16-11-06	2020-03-20-01-36-14	2	1	4	4	4	4	4	Detection fixed reloc	0.699
2020	4	14	16	40	42.805	38.034	22.9858	5.99	0.2	2	2020-04-14-16-40-42	2020-04-09-20-45-49	2	1	105	116	126	142	156	Detection fixed reloc	0.617
2020	4	14	16	54	31.385	38.0345	22.9682	6.63	-0.8	2	2020-04-14-16-54-31	2020-04-05-02-42-13	2	1	4	98	106	120	129	Detection fixed reloc	0.831
2020	4	14	18	4	13.461	38.0427	22.9601	6.21	-0.2	2	2020-04-14-18-04-13	2020-04-04-01-45-18	2	1	4	98	106	141	155	Detection fixed reloc	0.679
2020	4	14	18	49	52.073	38.0249	22.9602	6.75	-0.7	2	2020-04-14-18-49-52	2020-04-03-09-36-54	2	1	4	98	106	120	132	Detection fixed reloc	0.738
2020	4	14	20	37	24.084	38.0342	22.964	6.29	-0.7	2	2020-04-14-20-37-24	2020-04-14-04-53-28	2	1	4	4	4	147	161	Detection fixed reloc	0.857
2020	4	14	20	57	17.977	38.0306	22.9651	6.84	0.5	2	2020-04-14-20-57-17	2020-04-03-09-15-41	2	1	4	98	106	120	132	Detection fixed reloc	0.754
2020	4	14	21	12	19.749	38.0734	22.9095	5.35	0.2	2	2020-04-14-21-12-19	2020-05-23-02-13-42	2	2	70	75	80	91	98	Detection fixed reloc	0.653
2020	4	14	21	28	0.763	38.0085	22.9701	5.51	-0.5	2	2020-04-14-21-28-00	2020-04-21-03-28-13	2	1	4	4	4	147	161	Detection fixed reloc	0.604
2020	4	14	22	24	9.161	38.0427	22.9601	6.21	-0.6	2	2020-04-14-22-24-09	2020-04-04-01-45-18	2	1	4	98	106	141	155	Detection fixed reloc	0.664
2020	4	14	23	27	33.029	38.0834	22.9578	4.66	0	2	2020-04-14-23-27-33	2020-04-20-06-25-53	80	1	109	120	132	151	167	Detection fixed reloc	0.734
2020	4	15	0	46	50.364	38.0342	22.964	6.29	-0.4	2	2020-04-15-00-46-50	2020-04-14-04-53-28	2	1	4	4	4	147	161	Detection fixed reloc	0.618
2020	4	15	1	31	55.55	38.0374	22.9603	6.56	0.1	2	2020-04-15-01-31-55	2020-04-13-13-58-38	2	1	95	104	128	144	158	Detection fixed reloc	0.758
2020	4	15	2	8	39.945	38.0345	22.9682	6.63	-0.3	2	2020-04-15-02-08-39	2020-04-05-02-42-13	2	1	4	98	106	120	129	Detection fixed reloc	0.895
2020	4	15	2	44	25.01	38.0374	22.9603	6.56	-0.3	2	2020-04-15-02-44-25	2020-04-13-13-58-38	2	1	95	104	128	144	158	Detection fixed reloc	0.658
2020	4	15	4	16	50.991	38.0358	22.9585	5.61	-0.1	2	2020-04-15-04-16-50	2020-05-05-15-58-58	2	1	35	96	133	152	168	Detection fixed reloc	0.634
2020	4	15	7	4	0.483002	38.0085	22.9701	5.51	-0.4	2	2020-04-15-07-04-00	2020-04-21-03-28-13	2	1	4	4	4	147	161	Detection fixed reloc	0.646
2020	4	15	7	24	57.29	38.0374	22.9603	6.56	-0.1	2	2020-04-15-07-24-57	2020-04-13-13-58-38	2	1	95	104	128	144	158	Detection fixed reloc	0.695
2020	4	15	8	2	11.83	38.0374	22.9603	6.56	-0.1	2	2020-04-15-08-02-11	2020-04-13-13-58-38	2	1	95	104	128	144	158	Detection fixed reloc	0.667
2020	4	15	14	49	42.223	38.0085	22.9701	5.51	-0.1	2	2020-04-15-14-49-42	2020-04-21-03-28-13	2	1	4	4	4	147	161	Detection fixed reloc	0.719
2020	4	15	17	15	55.143	38.0085	22.9701	5.51	-0.4	2	2020-04-15-17-15-55	2020-04-21-03-28-13	2	1	4	4	4	147	161	Detection fixed reloc	0.683
2020	4	15	22	42	47.545	38.0345	22.9682	6.63	-0.2	2	2020-04-15-22-42-47	2020-04-05-02-42-13	2	1	4	98	106	120	129	Detection fixed reloc	0.609
2020	4	16	0	30	43.724	38.0342	22.964	6.29	0	2	2020-04-16-00-30-43	2020-04-14-04-53-28	2	1	4	4	4	147	161	Detection fixed reloc	0.636
2020	4	16	3	14	14.176	38.0525	22.9061	11.36	0	2	2020-04-16-03-14-14	2020-04-28-02-43-29	18	2	27	29	31	36	41	Detection fixed reloc	0.764
2020	4	16	4	31	55.001	38.0427	22.9601	6.21	-0.3	2	2020-04-16-04-31-55	2020-04-04-01-45-18	2	1	4	98	106	141	155	Detection fixed reloc	0.692
2020	4	16	5	21	6.987	38.2429	22.7226	19.26	1.8	1	2020-04-16-05-20-49	2020-04-16-05-20-49	22	7	32	35	38	72	78	Template reloc	1
2020	4	16	5	54	45.004	38.0342	22.964	6.29	0.4	2	2020-04-16-05-54-45	2020-04-14-04-53-28	2	1	4	4	4	147	161	Detection fixed reloc	0.671
2020	4	16	8	54	12.827	38.0723	22.9323	8.1	0.3	2	2020-04-16-08-54-12	2020-05-24-02-51-46	2	2	52	57	61	67	73	Detection fixed reloc	0.714
2020	4	16	10	13	16.165	38.034	22.9858	5.99	0.8	2	2020-04-16-10-13-16	2020-04-09-20-45-49	2	1	105	116	126	142	156	Detection fixed reloc	0.704
2020	4	16	10	14	16.996	38.0525	22.9061	11.36	0.1	2	2020-04-16-10-14-16	2020-04-28-02-43-29	18	2	27	29	31	36	41	Detection fixed reloc	0.614
2020	4	16	10	58	40.969	38.0632	22.9297	7.05	0	2	2020-04-16-10-58-40	2020-05-15-15-41-15	2	2	24	26	28	32	36	Detection fixed reloc	0.617
2020	4	16	11	34	1.084	38.0342	22.964	6.29	0.3	2	2020-04-16-11-34-01	2020-04-14-04-53-28	2	1	4	4	4	147	161	Detection fixed reloc	0.61
2020	4	16	12	4	13.416	38.0525	22.9061	11.36	-0.1	2	2020-04-16-12-04-13	2020-04-28-02-43-29	18	2	27	29	31	36	41	Detection fixed reloc	0.707
2020	4	16	13	46	45.903	38.0085	22.9701	5.51	0.5	2	2020-04-16-13-46-45	2020-04-21-03-28-13	2	1	4	4	4	147	161	Detection fixed reloc	0.698
2020	4	16	14	3	54.109	38.0393	22.9482	3.82	-0.1	2	2020-04-16-14-03-54	2020-07-10-19-56-41	2	1	110	121	134	153	169	Detection fixed reloc	0.6
2020	4	16	14	58	44.77	38.0374	22.9603	6.56	-0.3	2	2020-04-16-14-58-44	2020-04-13-13-58-38	2	1	95	104	128	144	158	Detection fixed reloc	0.691
2020	4	16	15	5	1.143	38.0085	22.9701	5.51	0.3	2	2020-04-16-15-05-01	2020-04-21-03-28-13	2	1	4	4	4	147	161	Detection fixed reloc	0.913
2020	4	16	15	26	36.225	38.034	22.9858	5.99	0.9	2	2020-04-16-15-26-36	2020-04-09-20-45-49	2	1	105	116	126	142	156	Detection fixed reloc	0.62
2020	4	16	15	57	37.63	38.0374	22.9603	6.56	-0.2	2	2020-04-16-15-57-37	2020-04-13-13-58-38	2	1	95	104	128	144	158	Detection fixed reloc	0.699
2020	4	16	17	36	26.073	38.0249	22.9602	6.75	-0.4	2	2020-04-16-17-36-26	2020-04-03-09-36-54	2	1	4	98	106	120	132	Detection fixed reloc	0.658
2020	4	16	17	49	33.203	38.0085	22.9701	5.51	0.6	2	2020-04-16-17-49-33	2020-04-21-03-28-13	2	1	4	4	4	147	161	Detection fixed reloc	0.702
2020	4	16	18	6	14.77	38.0374	22.9603	6.56	-0.7	2	2020-04-16-18-06-14	2020-04-13-13-58-38	2	1	95	104	128	144	158	Detection fixed reloc	0.812
2020	4	16	18	55	8.424	38.0342	22.964	6.29	-0.4	2	2020-04-16-18-55-08	2020-04-14-04-53-28	2	1	4	4	4	147	161	Detection fixed reloc	0.639
2020	4	16	18	59	57.923	38.0085	22.9701	5.51	-0.4	2	2020-04-16-18-59-57	2020-04-21-03-28-13	2	1	4	4	4	147	161	Detection fixed reloc	0.68
2020	4	16	19	22	44.507	38.0248	22.9667	6.84	-0.4	2	2020-04-16-19-22-44	2020-05-09-05-42-20	2	1	95	104	128	144	170	Detection fixed reloc	0.7
2020	4	16	19	54	24.484	38.0342	22.964	6.29	-0.3	2	2020-04-16-19-54-24	2020-04-14-04-53-28	2	1	4	4	4	147	161	Detection fixed reloc	0.629
2020	4	16	20	6	27.184	38.0342	22.964	6.29	-0.3	2	2020-04-16-20-06-27	2020-04-14-04-53-28	2	1	4	4	4	147	161	Detection fixed reloc	0.65
2020	4	16	20	26	18.463	38.0085	22.9701	5.51	-0.4	2	2020-04-16-20-26-18	2020-04-21-03-28-13	2	1	4	4	4	147	161	Detection fixed reloc	0.617
2020	4	16	20	39	31.18	38.0769	22.9218	6.71	-0.3	2	2020-04-16-20-39-31	2020-05-19-23-34-33	2	2	52	57	61	67	73	Detection fixed reloc	0.694
2020	4	16	21	9	31.623	38.0085	22.9701	5.51	-0.1	2	2020-04-16-21-09-31	2020-04-21-03-28-13	2	1	4	4	4	147	161	Detection fixed reloc	0.673
2020	4	16	21	59	30.743	38.0085	22.9701	5.51	0.7	2	2020-04-16-21-59-30	2020-04-21-03-28-13	2	1	4	4	4	147	161	Detection fixed reloc	0.618
2020	4	17	0	16	17.516	38.0525	22.9061	11.36	-0.6	2	2020-04-17-00-16-17	2020-04-28-02-43-29	18	2	27	29	31	36	41	Detection fixed reloc	0.788
2020	4	17	0	33	30.504	38.0342	22.964	6.29	-0.3	2	2020-04-17-00-33-30	2020-04-14-04-53-28	2	1	4	4	4	147	161	Detection fixed reloc	0.651
2020	4	17	0	45	27.676	38.0525	22.9061	11.36	-0.1	2	2020-04-17-00-45-27	2020-04-28-02-43-29	18	2	27	29	31	36	41	Detection fixed reloc	0.916
2020	4	17	1	17	5.771	38.0421	22.8927	14.64	-0.5	2	2020-04-17-01-17-05	2020-07-22-18-54-09	4	3	8	8	8	8	8	Detection fixed reloc	0.77
2020	4	17	1	17	51.543	38.0085	22.9701	5.51	-0.2	2	2020-04-17-01-17-51	2020-04-21-03-28-13	2	1	4	4	4	147	161	Detection fixed reloc	0.713
2020	4	17	1	22	36.047	38.0723	22.9323	8.1	-0.5	2	2020-04-17-01-22-36	2020-05-24-02-51-46	2	2	52	57	61	67	73	Detection fixed reloc	0.752
2020	4	17	1	36	22.057	38.0306	22.9651	6.84	1.3	2	2020-04-17-01-36-22	2020-04-03-09-15-41	2	1	4	98	106	120	132	Detection fixed reloc	0.639
2020	4	17	1	44	2.181	38.0427	22.9601	6.21	-0.5	2	2020-04-17-01-44-02	2020-04-04-01-45-18	2	1	4	98	106	141	155	Detection fixed reloc	0.682
2020	4	17	2	19	16.764	38.0342	22.964	6.29	-0.3	2	2020-04-17-02-19-16	2020-04-14-04-53-28	2	1	4	4	4	147	161	Detection fixed reloc	0.656
2020	4	17	2	25	45.147	38.0272	22.9624	8.06	-0.3	2	2020-04-17-02-25-45	2020-03-20-01-36-14	2	1	4	4	4	4	4	Detection fixed reloc	0.771
2020	4	17	2	26	41.947	38.0272	22.9624	8.06	-0.2	2	2020-04-17-02-26-41	2020-03-20-01-36-14	2	1	4	4	4	4	4	Detection fixed reloc	0.724
2020	4	17	2	27	59.231	38.1299	22.6108	11.59	0.6	2	2020-04-17-02-27-59	2020-04-17-17-17-44	81	9	111	122	135	154	171	Detection fixed reloc	0.905
2020	4	17	2	35	13.758	38.1308	22.7053	11.97	1.5	1	2020-04-17-02-35-14	2020-04-17-02-35-14	82	8	112	123	136	155	172	Template reloc	1
2020	4	17	3	1	28.385	38.0628	22.8281	11.67	-0.4	2	2020-04-17-03-01-28	2020-04-27-00-02-17	54	3	76	81	87	104	112	Detection fixed reloc	0.94
2020	4	17	4	8	49.307	38.0272	22.9624	8.06	0	2	2020-04-17-04-08-49	2020-03-20-01-36-14	2	1	4	4	4	4	4	Detection fixed reloc	0.614
2020	4	17	4	32	57.65	38.0374	22.9603	6.56	-0.9	2	2020-04-17-04-32-57	2020-04-13-13-58-38	2	1	95	104	128	144	158	Detection fixed reloc	0.765
2020	4	17	6	0	30.255	38.0384	22.9804	5.9	-0.4	2	2020-04-17-06-00-30	2020-05-15-13-13-55	83	1	110	124	137	156	173	Detection fixed reloc	0.606
2020	4	17	6	42	0.0559998	38.0525	22.9061	11.36	-0.4	2	2020-04-17-06-42-00	2020-04-28-02-43-29	18	2	27	29	31	36	41	Detection fixed reloc	0.768
2020	4	17	6	43	7.743	38.0085	22.9701	5.51	0.2	2	2020-04-17-06-43-07	2020-04-21-03-28-13	2	1	4	4	4	147	161	Detection fixed reloc	0.624
2020	4	17	7	0	49.63	38.0374	22.9603	6.56	-0.7	2	2020-04-17-07-00-49	2020-04-13-13-58-38	2	1	95	104	128	144	158	Detection fixed reloc	0.716
2020	4	17	7	46	44.236	38.0525	22.9061	11.36	-0.5	2	2020-04-17-07-46-44	2020-04-28-02-43-29	18	2	27	29	31	36	41	Detection fixed reloc	0.747
2020	4	17	8	58	58.75	38.0374	22.9603	6.56	-0.7	2	2020-04-17-08-58-58	2020-04-13-13-58-38	2	1	95	104	128	144	158	Detection fixed reloc	0.75
2020	4	17	9	27	42.576	38.0525	22.9061	11.36	-0.6	2	2020-04-17-09-27-42	2020-04-28-02-43-29	18	2	27	29	31	36	41	Detection fixed reloc	0.82
2020	4	17	9	44	6.756	38.0525	22.9061	11.36	-0.3	2	2020-04-17-09-44-06	2020-04-28-02-43-29	18	2	27	29	31	36	41	Detection fixed reloc	0.844
2020	4	17	10	24	36.836	38.0525	22.9061	11.36	-0.4	2	2020-04-17-10-24-36	2020-04-28-02-43-29	18	2	27	29	31	36	41	Detection fixed reloc	0.614
2020	4	17	10	52	26.844	38.0342	22.964	6.29	0.7	2	2020-04-17-10-52-26	2020-04-14-04-53-28	2	1	4	4	4	147	161	Detection fixed reloc	0.685
2020	4	17	10	52	52.83	38.0374	22.9603	6.56	-0.3	2	2020-04-17-10-52-52	2020-04-13-13-58-38	2	1	95	104	128	144	158	Detection fixed reloc	0.851
2020	4	17	11	2	53.915	38.0384	22.9804	5.9	-0.1	2	2020-04-17-11-02-53	2020-05-15-13-13-55	83	1	110	124	137	156	173	Detection fixed reloc	0.636
2020	4	17	11	11	4.084	38.0342	22.964	6.29	0.1	2	2020-04-17-11-11-04	2020-04-14-04-53-28	2	1	4	4	4	147	161	Detection fixed reloc	0.681
2020	4	17	11	11	26.305	38.0345	22.9682	6.63	-0.7	2	2020-04-17-11-11-26	2020-04-05-02-42-13	2	1	4	98	106	120	129	Detection fixed reloc	0.855
2020	4	17	11	24	43.87	38.0374	22.9603	6.56	-0.4	2	2020-04-17-11-24-43	2020-04-13-13-58-38	2	1	95	104	128	144	158	Detection fixed reloc	0.67
2020	4	17	11	33	48.373	38.0249	22.9602	6.75	-0.3	2	2020-04-17-11-33-48	2020-04-03-09-36-54	2	1	4	98	106	120	132	Detection fixed reloc	0.762
2020	4	17	11	38	9.909	38.0393	22.9482	3.82	0.5	2	2020-04-17-11-38-09	2020-07-10-19-56-41	2	1	110	121	134	153	169	Detection fixed reloc	0.629
2020	4	17	11	38	22.541	38.0427	22.9601	6.21	-0.4	2	2020-04-17-11-38-22	2020-04-04-01-45-18	2	1	4	98	106	141	155	Detection fixed reloc	0.714
2020	4	17	12	25	44.835	38.0384	22.9804	5.9	0.1	2	2020-04-17-12-25-44	2020-05-15-13-13-55	83	1	110	124	137	156	173	Detection fixed reloc	0.662
2020	4	17	12	43	28.835	38.0384	22.9804	5.9	-0.1	2	2020-04-17-12-43-28	2020-05-15-13-13-55	83	1	110	124	137	156	173	Detection fixed reloc	0.602
2020	4	17	12	45	20.759	38.0179	22.9501	4.52	-0.1	2	2020-04-17-12-45-20	2020-04-27-04-53-51	2	1	110	121	134	153	174	Detection fixed reloc	0.663
2020	4	17	13	25	59.225	38.0345	22.9682	6.63	-1	2	2020-04-17-13-25-59	2020-04-05-02-42-13	2	1	4	98	106	120	129	Detection fixed reloc	0.852
2020	4	17	14	15	25.791	38.024	23.001	3.76	-0.2	2	2020-04-17-14-15-25	2020-04-24-18-58-43	2	1	113	125	138	157	175	Detection fixed reloc	0.697
2020	4	17	14	17	14.609	38.0632	22.9297	7.05	0.4	2	2020-04-17-14-17-14	2020-05-15-15-41-15	2	2	24	26	28	32	36	Detection fixed reloc	0.608
2020	4	17	14	50	10.175	38.0384	22.9804	5.9	-0.1	2	2020-04-17-14-50-10	2020-05-15-13-13-55	83	1	110	124	137	156	173	Detection fixed reloc	0.603
2020	4	17	15	4	8.217	38.0175	22.9372	11.51	0.5	2	2020-04-17-15-04-08	2020-08-15-01-51-15	17	1	26	28	30	35	39	Detection fixed reloc	0.618
2020	4	17	15	6	31.864	38.0342	22.964	6.29	-0.8	2	2020-04-17-15-06-31	2020-04-14-04-53-28	2	1	4	4	4	147	161	Detection fixed reloc	0.791
2020	4	17	15	35	30.756	38.0525	22.9061	11.36	-0.2	2	2020-04-17-15-35-30	2020-04-28-02-43-29	18	2	27	29	31	36	41	Detection fixed reloc	0.695
2020	4	17	15	45	34.951	38.024	23.001	3.76	0.5	2	2020-04-17-15-45-34	2020-04-24-18-58-43	2	1	113	125	138	157	175	Detection fixed reloc	0.705
2020	4	17	16	13	32.309	38.0632	22.9297	7.05	-0.1	2	2020-04-17-16-13-32	2020-05-15-15-41-15	2	2	24	26	28	32	36	Detection fixed reloc	0.615
2020	4	17	16	15	27.535	38.0384	22.9804	5.9	-0.2	2	2020-04-17-16-15-27	2020-05-15-13-13-55	83	1	110	124	137	156	173	Detection fixed reloc	0.626
2020	4	17	16	46	46.691	38.1299	22.6108	11.59	1	2	2020-04-17-16-46-46	2020-04-17-17-17-44	81	9	111	122	135	154	171	Detection fixed reloc	0.683
2020	4	17	17	2	18.851	38.1299	22.6108	11.59	0.3	2	2020-04-17-17-02-18	2020-04-17-17-17-44	81	9	111	122	135	154	171	Detection fixed reloc	0.772
2020	4	17	17	13	16.849	38.026	22.961	4.87	-0.5	2	2020-04-17-17-13-16	2020-05-03-09-56-04	2	1	35	96	104	118	127	Detection fixed reloc	0.62
2020	4	17	17	17	43.641	38.1299	22.6108	11.59	1.9	1	2020-04-17-17-17-44	2020-04-17-17-17-44	81	9	111	122	135	154	171	Template reloc	1
2020	4	17	17	39	13.383	38.0085	22.9701	5.51	0.7	2	2020-04-17-17-39-13	2020-04-21-03-28-13	2	1	4	4	4	147	161	Detection fixed reloc	0.618
2020	4	17	17	54	3.405	38.0345	22.9682	6.63	-0.2	2	2020-04-17-17-54-03	2020-04-05-02-42-13	2	1	4	98	106	120	129	Detection fixed reloc	0.634
2020	4	17	18	21	11.056	38.0525	22.9061	11.36	-0.3	2	2020-04-17-18-21-11	2020-04-28-02-43-29	18	2	27	29	31	36	41	Detection fixed reloc	0.707
2020	4	17	18	22	4.953	38.0249	22.9602	6.75	-0.9	2	2020-04-17-18-22-04	2020-04-03-09-36-54	2	1	4	98	106	120	132	Detection fixed reloc	0.672
2020	4	17	18	30	11.169	38.026	22.961	4.87	-0.4	2	2020-04-17-18-30-11	2020-05-03-09-56-04	2	1	35	96	104	118	127	Detection fixed reloc	0.617
2020	4	17	19	14	15.35	38.0374	22.9603	6.56	-0.7	2	2020-04-17-19-14-15	2020-04-13-13-58-38	2	1	95	104	128	144	158	Detection fixed reloc	0.728
2020	4	17	21	7	0.887001	38.0723	22.9323	8.1	0	2	2020-04-17-21-07-00	2020-05-24-02-51-46	2	2	52	57	61	67	73	Detection fixed reloc	0.67
2020	4	17	21	8	56.027	38.0723	22.9323	8.1	0	2	2020-04-17-21-08-56	2020-05-24-02-51-46	2	2	52	57	61	67	73	Detection fixed reloc	0.733
2020	4	17	21	54	48.343	38.1153	22.6177	12.55	0.5	2	2020-04-17-21-54-48	2020-04-17-22-59-58	81	9	111	122	139	158	176	Detection fixed reloc	0.811
2020	4	17	22	39	57.791	38.1299	22.6108	11.59	1	2	2020-04-17-22-39-57	2020-04-17-17-17-44	81	9	111	122	135	154	171	Detection fixed reloc	0.635
2020	4	17	22	58	25.835	38.0384	22.9804	5.9	-0.4	2	2020-04-17-22-58-25	2020-05-15-13-13-55	83	1	110	124	137	156	173	Detection fixed reloc	0.612
2020	4	17	22	59	58.223	38.1153	22.6177	12.55	0.9	1	2020-04-17-22-59-58	2020-04-17-22-59-58	81	9	111	122	139	158	176	Template reloc	1
2020	4	17	23	1	55.201	38.1411	22.613	11.82	1.3	1	2020-04-17-23-01-55	2020-04-17-23-01-55	81	9	111	122	139	158	177	Template reloc	1
2020	4	17	23	24	42.716	38.0525	22.9061	11.36	0.1	2	2020-04-17-23-24-42	2020-04-28-02-43-29	18	2	27	29	31	36	41	Detection fixed reloc	0.837
2020	4	17	23	25	20.703	38.0085	22.9701	5.51	-0.3	2	2020-04-17-23-25-20	2020-04-21-03-28-13	2	1	4	4	4	147	161	Detection fixed reloc	0.606
2020	4	17	23	30	12.236	38.0525	22.9061	11.36	-0.5	2	2020-04-17-23-30-12	2020-04-28-02-43-29	18	2	27	29	31	36	41	Detection fixed reloc	0.659
2020	4	17	23	36	0.375999	38.0525	22.9061	11.36	-0.5	2	2020-04-17-23-36-00	2020-04-28-02-43-29	18	2	27	29	31	36	41	Detection fixed reloc	0.832
2020	4	18	0	25	33.036	38.0525	22.9061	11.36	-0.5	2	2020-04-18-00-25-33	2020-04-28-02-43-29	18	2	27	29	31	36	41	Detection fixed reloc	0.822
2020	4	18	0	36	3.31	38.0374	22.9603	6.56	-0.8	2	2020-04-18-00-36-03	2020-04-13-13-58-38	2	1	95	104	128	144	158	Detection fixed reloc	0.793
2020	4	18	0	39	35.963	38.1397	22.6125	10.6	1.6	1	2020-04-18-00-39-37	2020-04-18-00-39-37	84	9	114	126	140	159	178	Template reloc	1
2020	4	18	1	5	35.41	38.0374	22.9603	6.56	-0.8	2	2020-04-18-01-05-35	2020-04-13-13-58-38	2	1	95	104	128	144	158	Detection fixed reloc	0.662
2020	4	18	1	25	53.265	38.0294	22.9829	6.1	-0.1	2	2020-04-18-01-25-53	2020-04-21-15-58-52	2	1	113	125	138	157	179	Detection fixed reloc	0.671
2020	4	18	2	55	6.411	38.1299	22.6108	11.59	1	2	2020-04-18-02-55-06	2020-04-17-17-17-44	81	9	111	122	135	154	171	Detection fixed reloc	0.628
2020	4	18	4	27	0.536003	38.0525	22.9061	11.36	-0.4	2	2020-04-18-04-27-00	2020-04-28-02-43-29	18	2	27	29	31	36	41	Detection fixed reloc	0.678
2020	4	18	4	49	54.355	38.0384	22.9804	5.9	-0.1	2	2020-04-18-04-49-54	2020-05-15-13-13-55	83	1	110	124	137	156	173	Detection fixed reloc	0.602
2020	4	18	4	51	34.523	38.0085	22.9701	5.51	-1	2	2020-04-18-04-51-34	2020-04-21-03-28-13	2	1	4	4	4	147	161	Detection fixed reloc	0.747
2020	4	18	4	54	5.636	38.0525	22.9061	11.36	-0.4	2	2020-04-18-04-54-05	2020-04-28-02-43-29	18	2	27	29	31	36	41	Detection fixed reloc	0.703
2020	4	18	5	34	1.245	38.034	22.9858	5.99	1	2	2020-04-18-05-34-01	2020-04-09-20-45-49	2	1	105	116	126	142	156	Detection fixed reloc	0.62
2020	4	18	6	11	45.759	38.0179	22.9501	4.52	-0.2	2	2020-04-18-06-11-45	2020-04-27-04-53-51	2	1	110	121	134	153	174	Detection fixed reloc	0.665
2020	4	18	6	40	11.604	38.0342	22.964	6.29	0.2	2	2020-04-18-06-40-11	2020-04-14-04-53-28	2	1	4	4	4	147	161	Detection fixed reloc	0.621
2020	4	18	7	48	29.869	38.0632	22.9297	7.05	0.1	2	2020-04-18-07-48-29	2020-05-15-15-41-15	2	2	24	26	28	32	36	Detection fixed reloc	0.711
2020	4	18	7	58	22.924	38.0342	22.964	6.29	-0.1	2	2020-04-18-07-58-22	2020-04-14-04-53-28	2	1	4	4	4	147	161	Detection fixed reloc	0.708
2020	4	18	8	3	50.785	38.0294	22.9829	6.1	0	2	2020-04-18-08-03-50	2020-04-21-15-58-52	2	1	113	125	138	157	179	Detection fixed reloc	0.63
2020	4	18	8	39	31.521	38.0427	22.9601	6.21	-0.2	2	2020-04-18-08-39-31	2020-04-04-01-45-18	2	1	4	98	106	141	155	Detection fixed reloc	0.709
2020	4	18	8	53	42.696	38.0525	22.9061	11.36	-0.1	2	2020-04-18-08-53-42	2020-04-28-02-43-29	18	2	27	29	31	36	41	Detection fixed reloc	0.64
2020	4	18	9	3	55.205	38.034	22.9858	5.99	-0.1	2	2020-04-18-09-03-55	2020-04-09-20-45-49	2	1	105	116	126	142	156	Detection fixed reloc	0.608
2020	4	18	9	52	15.951	38.024	23.001	3.76	0.4	2	2020-04-18-09-52-15	2020-04-24-18-58-43	2	1	113	125	138	157	175	Detection fixed reloc	0.606
2020	4	18	10	9	56.525	38.0345	22.9682	6.63	-0.6	2	2020-04-18-10-09-56	2020-04-05-02-42-13	2	1	4	98	106	120	129	Detection fixed reloc	0.638
2020	4	18	10	22	27.369	38.0393	22.9482	3.82	-0.6	2	2020-04-18-10-22-27	2020-07-10-19-56-41	2	1	110	121	134	153	169	Detection fixed reloc	0.672
2020	4	18	11	8	10.964	38.0342	22.964	6.29	-0.1	2	2020-04-18-11-08-10	2020-04-14-04-53-28	2	1	4	4	4	147	161	Detection fixed reloc	0.641
2020	4	18	11	56	53.215	38.0384	22.9804	5.9	-0.4	2	2020-04-18-11-56-53	2020-05-15-13-13-55	83	1	110	124	137	156	173	Detection fixed reloc	0.61
2020	4	18	12	2	35.381	38.188	22.578	13.13	0.8	2	2020-04-18-12-02-35	2020-05-13-00-10-42	85	10	115	127	141	160	180	Detection fixed reloc	0.749
2020	4	18	12	13	36.43	38.0374	22.9603	6.56	-0.8	2	2020-04-18-12-13-36	2020-04-13-13-58-38	2	1	95	104	128	144	158	Detection fixed reloc	0.724
2020	4	18	12	22	57.357	38.0175	22.9372	11.51	0.3	2	2020-04-18-12-22-57	2020-08-15-01-51-15	17	1	26	28	30	35	39	Detection fixed reloc	0.601
2020	4	18	12	31	3.581	38.188	22.578	13.13	1	2	2020-04-18-12-31-03	2020-05-13-00-10-42	85	10	115	127	141	160	180	Detection fixed reloc	0.779
2020	4	18	13	24	36.42	38.1716	22.5811	18.35	0.3	2	2020-04-18-13-24-36	2020-04-18-13-25-34	85	9	115	128	142	161	181	Detection fixed reloc	0.774
2020	4	18	13	25	34.42	38.1716	22.5811	18.35	1.2	1	2020-04-18-13-25-34	2020-04-18-13-25-34	85	9	115	128	142	161	181	Template reloc	1
2020	4	18	13	26	51.62	38.1716	22.5811	18.35	0.4	2	2020-04-18-13-26-51	2020-04-18-13-25-34	85	9	115	128	142	161	181	Detection fixed reloc	0.722
2020	4	18	13	27	38.419	38.0179	22.9501	4.52	-0.3	2	2020-04-18-13-27-38	2020-04-27-04-53-51	2	1	110	121	134	153	174	Detection fixed reloc	0.661
2020	4	18	14	1	7.985	38.0294	22.9829	6.1	-0.1	2	2020-04-18-14-01-07	2020-04-21-15-58-52	2	1	113	125	138	157	179	Detection fixed reloc	0.602
2020	4	18	14	17	24.565	38.111	22.7066	15.96	1.2	1	2020-04-18-14-17-27	2020-04-18-14-17-27	86	8	116	129	143	162	182	Template reloc	1
2020	4	18	14	27	45.961	38.0427	22.9601	6.21	-0.6	2	2020-04-18-14-27-45	2020-04-04-01-45-18	2	1	4	98	106	141	155	Detection fixed reloc	0.707
2020	4	18	15	14	59.517	38.0306	22.9651	6.84	0.5	2	2020-04-18-15-14-59	2020-04-03-09-15-41	2	1	4	98	106	120	132	Detection fixed reloc	0.621
2020	4	18	15	32	37.227	38.0723	22.9323	8.1	-0.4	2	2020-04-18-15-32-37	2020-05-24-02-51-46	2	2	52	57	61	67	73	Detection fixed reloc	0.776
2020	4	18	15	42	58.765	38.0294	22.9829	6.1	0.5	2	2020-04-18-15-42-58	2020-04-21-15-58-52	2	1	113	125	138	157	179	Detection fixed reloc	0.612
2020	4	18	16	11	19.827	38.0723	22.9323	8.1	-0.4	2	2020-04-18-16-11-19	2020-05-24-02-51-46	2	2	52	57	61	67	73	Detection fixed reloc	0.793
2020	4	18	16	31	59.545	38.0345	22.9682	6.63	0.4	2	2020-04-18-16-31-59	2020-04-05-02-42-13	2	1	4	98	106	120	129	Detection fixed reloc	0.615
2020	4	18	16	57	31.321	38.0427	22.9601	6.21	-0.1	2	2020-04-18-16-57-31	2020-04-04-01-45-18	2	1	4	98	106	141	155	Detection fixed reloc	0.71
2020	4	18	17	26	1.915	38.0384	22.9804	5.9	-0.3	2	2020-04-18-17-26-01	2020-05-15-13-13-55	83	1	110	124	137	156	173	Detection fixed reloc	0.603
2020	4	18	17	28	30.641	38.0427	22.9601	6.21	-0.1	2	2020-04-18-17-28-30	2020-04-04-01-45-18	2	1	4	98	106	141	155	Detection fixed reloc	0.678
2020	4	18	17	40	12.757	38.2429	22.7226	19.26	1.1	2	2020-04-18-17-40-12	2020-04-16-05-20-49	22	7	32	35	38	72	78	Detection fixed reloc	0.817
2020	4	18	17	53	35.27	38.0374	22.9603	6.56	-0.5	2	2020-04-18-17-53-35	2020-04-13-13-58-38	2	1	95	104	128	144	158	Detection fixed reloc	0.723
2020	4	18	19	42	51.261	38.0427	22.9601	6.21	0.8	2	2020-04-18-19-42-51	2020-04-04-01-45-18	2	1	4	98	106	141	155	Detection fixed reloc	0.672
2020	4	18	19	59	13.931	38.024	23.001	3.76	-0.2	2	2020-04-18-19-59-13	2020-04-24-18-58-43	2	1	113	125	138	157	175	Detection fixed reloc	0.613
2020	4	18	20	35	34.604	38.0342	22.964	6.29	-0.4	2	2020-04-18-20-35-34	2020-04-14-04-53-28	2	1	4	4	4	147	161	Detection fixed reloc	0.672
2020	4	18	20	51	39.43	38.0374	22.9603	6.56	-0.6	2	2020-04-18-20-51-39	2020-04-13-13-58-38	2	1	95	104	128	144	158	Detection fixed reloc	0.694
2020	4	18	21	20	43.661	38.188	22.578	13.13	0.5	2	2020-04-18-21-20-43	2020-05-13-00-10-42	85	10	115	127	141	160	180	Detection fixed reloc	0.813
2020	4	18	21	40	42.665	38.0294	22.9829	6.1	-0.7	2	2020-04-18-21-40-42	2020-04-21-15-58-52	2	1	113	125	138	157	179	Detection fixed reloc	0.725
2020	4	18	21	49	24.156	38.0525	22.9061	11.36	-0.3	2	2020-04-18-21-49-24	2020-04-28-02-43-29	18	2	27	29	31	36	41	Detection fixed reloc	0.715
2020	4	18	21	52	30.878	38.0536	22.9344	7.23	0.3	2	2020-04-18-21-52-30	2020-07-07-19-23-21	2	2	94	103	111	125	183	Detection fixed reloc	0.613
2020	4	18	21	57	7.905	38.0294	22.9829	6.1	-0.6	2	2020-04-18-21-57-07	2020-04-21-15-58-52	2	1	113	125	138	157	179	Detection fixed reloc	0.723
2020	4	18	22	2	57.858	38.0531	22.9366	7.14	-0.2	2	2020-04-18-22-02-57	2020-05-12-14-58-08	2	2	94	103	111	125	183	Detection fixed reloc	0.639
2020	4	18	22	7	29.29	38.0374	22.9603	6.56	-0.6	2	2020-04-18-22-07-29	2020-04-13-13-58-38	2	1	95	104	128	144	158	Detection fixed reloc	0.83
2020	4	18	22	26	46.27	38.0374	22.9603	6.56	-0.7	2	2020-04-18-22-26-46	2020-04-13-13-58-38	2	1	95	104	128	144	158	Detection fixed reloc	0.664
2020	4	18	22	32	10.675	38.0384	22.9804	5.9	-0.1	2	2020-04-18-22-32-10	2020-05-15-13-13-55	83	1	110	124	137	156	173	Detection fixed reloc	0.612
2020	4	18	22	35	9.645	38.0294	22.9829	6.1	0.7	2	2020-04-18-22-35-09	2020-04-21-15-58-52	2	1	113	125	138	157	179	Detection fixed reloc	0.668
2020	4	18	23	4	50.227	38.0723	22.9323	8.1	-0.2	2	2020-04-18-23-04-50	2020-05-24-02-51-46	2	2	52	57	61	67	73	Detection fixed reloc	0.638
2020	4	18	23	15	59.515	38.0384	22.9804	5.9	-0.3	2	2020-04-18-23-15-59	2020-05-15-13-13-55	83	1	110	124	137	156	173	Detection fixed reloc	0.649
2020	4	18	23	16	20.25	38.0374	22.9603	6.56	-0.5	2	2020-04-18-23-16-20	2020-04-13-13-58-38	2	1	95	104	128	144	158	Detection fixed reloc	0.769
2020	4	18	23	24	54.005	38.0294	22.9829	6.1	-0.1	2	2020-04-18-23-24-54	2020-04-21-15-58-52	2	1	113	125	138	157	179	Detection fixed reloc	0.756
2020	4	18	23	32	20.925	38.0294	22.9829	6.1	0	2	2020-04-18-23-32-20	2020-04-21-15-58-52	2	1	113	125	138	157	179	Detection fixed reloc	0.757
2020	4	19	0	11	52.085	38.0294	22.9829	6.1	-0.2	2	2020-04-19-00-11-52	2020-04-21-15-58-52	2	1	113	125	138	157	179	Detection fixed reloc	0.616
2020	4	19	0	18	13.731	38.024	23.001	3.76	0.1	2	2020-04-19-00-18-13	2020-04-24-18-58-43	2	1	113	125	138	157	175	Detection fixed reloc	0.612
2020	4	19	0	26	10.085	38.0345	22.9682	6.63	0.3	2	2020-04-19-00-26-10	2020-04-05-02-42-13	2	1	4	98	106	120	129	Detection fixed reloc	0.888
2020	4	19	0	34	10.784	38.0342	22.964	6.29	0.7	2	2020-04-19-00-34-10	2020-04-14-04-53-28	2	1	4	4	4	147	161	Detection fixed reloc	0.7
2020	4	19	0	37	47.425	38.0345	22.9682	6.63	-0.4	2	2020-04-19-00-37-47	2020-04-05-02-42-13	2	1	4	98	106	120	129	Detection fixed reloc	0.636
2020	4	19	1	28	23.945	38.034	22.9858	5.99	0.5	2	2020-04-19-01-28-23	2020-04-09-20-45-49	2	1	105	116	126	142	156	Detection fixed reloc	0.62
2020	4	19	1	34	11.881	38.0427	22.9601	6.21	0.2	2	2020-04-19-01-34-11	2020-04-04-01-45-18	2	1	4	98	106	141	155	Detection fixed reloc	0.665
2020	4	19	2	0	16.653	38.2527	22.7231	3.42	1.1	2	2020-04-19-02-00-16	2020-02-18-04-32-23	22	7	32	35	38	43	48	Detection fixed reloc	0.643
2020	4	19	2	2	54.07	38.0374	22.9603	6.56	-0.1	2	2020-04-19-02-02-54	2020-04-13-13-58-38	2	1	95	104	128	144	158	Detection fixed reloc	0.704
2020	4	19	2	9	57.331	38.024	23.001	3.76	0.6	2	2020-04-19-02-09-57	2020-04-24-18-58-43	2	1	113	125	138	157	175	Detection fixed reloc	0.63
2020	4	19	2	40	17.896	38.0525	22.9061	11.36	0.2	2	2020-04-19-02-40-17	2020-04-28-02-43-29	18	2	27	29	31	36	41	Detection fixed reloc	0.808
2020	4	19	2	51	16.745	38.034	22.9858	5.99	0.1	2	2020-04-19-02-51-16	2020-04-09-20-45-49	2	1	105	116	126	142	156	Detection fixed reloc	0.65
2020	4	19	2	55	49.821	38.0427	22.9601	6.21	0.2	2	2020-04-19-02-55-49	2020-04-04-01-45-18	2	1	4	98	106	141	155	Detection fixed reloc	0.707
2020	4	19	3	21	4.065	38.0294	22.9829	6.1	-0.1	2	2020-04-19-03-21-04	2020-04-21-15-58-52	2	1	113	125	138	157	179	Detection fixed reloc	0.709
2020	4	19	3	50	10.75	38.0703	22.9323	5.51	0.1	2	2020-04-19-03-50-10	2020-05-20-22-40-34	2	2	51	56	85	98	106	Detection fixed reloc	0.602
2020	4	19	4	11	23.485	38.0294	22.9829	6.1	-0.1	2	2020-04-19-04-11-23	2020-04-21-15-58-52	2	1	113	125	138	157	179	Detection fixed reloc	0.639
2020	4	19	4	20	53.829	38.026	22.961	4.87	-0.3	2	2020-04-19-04-20-53	2020-05-03-09-56-04	2	1	35	96	104	118	127	Detection fixed reloc	0.625
2020	4	19	4	53	27.311	38.2152	22.6185	5.51	0.6	2	2020-04-19-04-53-27	2020-03-23-21-40-26	37	10	53	94	102	128	139	Detection fixed reloc	0.636
2020	4	19	5	2	7.985	38.0294	22.9829	6.1	-0.2	2	2020-04-19-05-02-07	2020-04-21-15-58-52	2	1	113	125	138	157	179	Detection fixed reloc	0.61
2020	4	19	5	12	43.363	38.2491	22.7201	16.25	1.1	2	2020-04-19-05-12-43	2020-02-24-12-57-48	22	7	32	35	38	72	90	Detection fixed reloc	0.628
2020	4	19	5	27	40.745	38.0294	22.9829	6.1	0.1	2	2020-04-19-05-27-40	2020-04-21-15-58-52	2	1	113	125	138	157	179	Detection fixed reloc	0.628
2020	4	19	5	36	31.325	38.0294	22.9829	6.1	0.5	2	2020-04-19-05-36-31	2020-04-21-15-58-52	2	1	113	125	138	157	179	Detection fixed reloc	0.81
2020	4	19	5	37	51.956	38.0525	22.9061	11.36	-0.4	2	2020-04-19-05-37-51	2020-04-28-02-43-29	18	2	27	29	31	36	41	Detection fixed reloc	0.765
2020	4	19	5	46	18.959	38.0179	22.9501	4.52	-0.2	2	2020-04-19-05-46-18	2020-04-27-04-53-51	2	1	110	121	134	153	174	Detection fixed reloc	0.696
2020	4	19	5	51	5.445	38.034	22.9858	5.99	0.4	2	2020-04-19-05-51-05	2020-04-09-20-45-49	2	1	105	116	126	142	156	Detection fixed reloc	0.649
2020	4	19	5	55	15.785	38.0345	22.9682	6.63	-0.6	2	2020-04-19-05-55-15	2020-04-05-02-42-13	2	1	4	98	106	120	129	Detection fixed reloc	0.631
2020	4	19	6	0	48.143	38.0085	22.9701	5.51	-0.9	2	2020-04-19-06-00-48	2020-04-21-03-28-13	2	1	4	4	4	147	161	Detection fixed reloc	0.791
2020	4	19	6	9	2.996	38.0525	22.9061	11.36	0.9	2	2020-04-19-06-09-02	2020-04-28-02-43-29	18	2	27	29	31	36	41	Detection fixed reloc	0.844
2020	4	19	6	12	37.37	38.0374	22.9603	6.56	-0.6	2	2020-04-19-06-12-37	2020-04-13-13-58-38	2	1	95	104	128	144	158	Detection fixed reloc	0.734
2020	4	19	6	14	16.531	38.024	23.001	3.76	0.3	2	2020-04-19-06-14-16	2020-04-24-18-58-43	2	1	113	125	138	157	175	Detection fixed reloc	0.704
2020	4	19	6	17	31.363	38.0085	22.9701	5.51	-0.6	2	2020-04-19-06-17-31	2020-04-21-03-28-13	2	1	4	4	4	147	161	Detection fixed reloc	0.603
2020	4	19	6	26	11.083	38.0085	22.9701	5.51	0.7	2	2020-04-19-06-26-11	2020-04-21-03-28-13	2	1	4	4	4	147	161	Detection fixed reloc	0.625
2020	4	19	6	50	47.616	38.0525	22.9061	11.36	-0.3	2	2020-04-19-06-50-47	2020-04-28-02-43-29	18	2	27	29	31	36	41	Detection fixed reloc	0.721
2020	4	19	6	52	42.201	38.0427	22.9601	6.21	-0.5	2	2020-04-19-06-52-42	2020-04-04-01-45-18	2	1	4	98	106	141	155	Detection fixed reloc	0.673
2020	4	19	6	59	7.621	38.0427	22.9601	6.21	0	2	2020-04-19-06-59-07	2020-04-04-01-45-18	2	1	4	98	106	141	155	Detection fixed reloc	0.693
2020	4	19	7	2	4.945	38.0294	22.9829	6.1	0.9	2	2020-04-19-07-02-04	2020-04-21-15-58-52	2	1	113	125	138	157	179	Detection fixed reloc	0.628
2020	4	19	7	11	37.851	38.024	23.001	3.76	0.4	2	2020-04-19-07-11-37	2020-04-24-18-58-43	2	1	113	125	138	157	175	Detection fixed reloc	0.629
2020	4	19	7	15	46.898	38.0536	22.9344	7.23	0.1	2	2020-04-19-07-15-46	2020-07-07-19-23-21	2	2	94	103	111	125	183	Detection fixed reloc	0.609
2020	4	19	7	18	58.907	38.0723	22.9323	8.1	0.1	2	2020-04-19-07-18-58	2020-05-24-02-51-46	2	2	52	57	61	67	73	Detection fixed reloc	0.607
2020	4	19	7	19	28.314	38.0456	22.9417	8.07	0.8	2	2020-04-19-07-19-28	2020-05-22-18-58-33	2	1	94	103	111	125	136	Detection fixed reloc	0.611
2020	4	19	7	30	44.641	38.0427	22.9601	6.21	-0.2	2	2020-04-19-07-30-44	2020-04-04-01-45-18	2	1	4	98	106	141	155	Detection fixed reloc	0.719
2020	4	19	7	44	27.981	38.0427	22.9601	6.21	-0.3	2	2020-04-19-07-44-27	2020-04-04-01-45-18	2	1	4	98	106	141	155	Detection fixed reloc	0.658
2020	4	19	8	9	11.371	38.024	23.001	3.76	0	2	2020-04-19-08-09-11	2020-04-24-18-58-43	2	1	113	125	138	157	175	Detection fixed reloc	0.641
2020	4	19	8	14	39.469	38.0632	22.9297	7.05	-0.4	2	2020-04-19-08-14-39	2020-05-15-15-41-15	2	2	24	26	28	32	36	Detection fixed reloc	0.691
2020	4	19	8	29	5.036	38.0525	22.9061	11.36	-0.4	2	2020-04-19-08-29-05	2020-04-28-02-43-29	18	2	27	29	31	36	41	Detection fixed reloc	0.724
2020	4	19	8	48	44.43	38.0374	22.9603	6.56	-1.2	2	2020-04-19-08-48-44	2020-04-13-13-58-38	2	1	95	104	128	144	158	Detection fixed reloc	0.757
2020	4	19	9	8	28.521	38.0427	22.9601	6.21	-0.6	2	2020-04-19-09-08-28	2020-04-04-01-45-18	2	1	4	98	106	141	155	Detection fixed reloc	0.713
2020	4	19	9	10	47.941	38.0427	22.9601	6.21	-0.2	2	2020-04-19-09-10-47	2020-04-04-01-45-18	2	1	4	98	106	141	155	Detection fixed reloc	0.69
2020	4	19	9	19	36.841	38.0427	22.9601	6.21	0.2	2	2020-04-19-09-19-36	2020-04-04-01-45-18	2	1	4	98	106	141	155	Detection fixed reloc	0.663
2020	4	19	9	28	15.33	38.0365	22.9858	5.97	-0.5	2	2020-04-19-09-28-15	2020-04-23-06-19-30	87	1	117	130	144	163	184	Detection fixed reloc	0.744
2020	4	19	9	39	31.901	38.0427	22.9601	6.21	-0.4	2	2020-04-19-09-39-31	2020-04-04-01-45-18	2	1	4	98	106	141	155	Detection fixed reloc	0.668
2020	4	19	10	11	3.041	38.0427	22.9601	6.21	0.7	2	2020-04-19-10-11-03	2020-04-04-01-45-18	2	1	4	98	106	141	155	Detection fixed reloc	0.668
2020	4	19	10	15	59.153	38.0249	22.9602	6.75	0	2	2020-04-19-10-15-59	2020-04-03-09-36-54	2	1	4	98	106	120	132	Detection fixed reloc	0.658
2020	4	19	10	24	46.849	38.026	22.961	4.87	-0.3	2	2020-04-19-10-24-46	2020-05-03-09-56-04	2	1	35	96	104	118	127	Detection fixed reloc	0.608
2020	4	19	10	34	49.311	38.024	23.001	3.76	0.6	2	2020-04-19-10-34-49	2020-04-24-18-58-43	2	1	113	125	138	157	175	Detection fixed reloc	0.667
2020	4	19	10	50	44.171	38.024	23.001	3.76	0.4	2	2020-04-19-10-50-44	2020-04-24-18-58-43	2	1	113	125	138	157	175	Detection fixed reloc	0.633
2020	4	19	11	1	31.734	38.0456	22.9417	8.07	0.6	2	2020-04-19-11-01-31	2020-05-22-18-58-33	2	1	94	103	111	125	136	Detection fixed reloc	0.61
2020	4	19	11	12	42.125	38.0294	22.9829	6.1	0.2	2	2020-04-19-11-12-42	2020-04-21-15-58-52	2	1	113	125	138	157	179	Detection fixed reloc	0.835
2020	4	19	11	31	56.484	38.0342	22.964	6.29	-0.3	2	2020-04-19-11-31-56	2020-04-14-04-53-28	2	1	4	4	4	147	161	Detection fixed reloc	0.612
2020	4	19	11	38	24.405	38.0294	22.9829	6.1	0.3	2	2020-04-19-11-38-24	2020-04-21-15-58-52	2	1	113	125	138	157	179	Detection fixed reloc	0.731
2020	4	19	11	39	42.761	38.0427	22.9601	6.21	0.2	2	2020-04-19-11-39-42	2020-04-04-01-45-18	2	1	4	98	106	141	155	Detection fixed reloc	0.652
2020	4	19	11	45	39.187	38.0529	22.9397	7.55	-0.3	2	2020-04-19-11-45-39	2020-06-02-00-19-43	2	2	35	38	42	164	185	Detection fixed reloc	0.617
2020	4	19	12	29	23.31	38.0374	22.9603	6.56	-0.5	2	2020-04-19-12-29-23	2020-04-13-13-58-38	2	1	95	104	128	144	158	Detection fixed reloc	0.653
2020	4	19	13	3	28.81	38.0374	22.9603	6.56	-0.6	2	2020-04-19-13-03-28	2020-04-13-13-58-38	2	1	95	104	128	144	158	Detection fixed reloc	0.663
2020	4	19	13	11	55.15	38.0374	22.9603	6.56	-0.6	2	2020-04-19-13-11-55	2020-04-13-13-58-38	2	1	95	104	128	144	158	Detection fixed reloc	0.708
2020	4	19	13	50	33.165	38.034	22.9858	5.99	0.6	2	2020-04-19-13-50-33	2020-04-09-20-45-49	2	1	105	116	126	142	156	Detection fixed reloc	0.627
2020	4	19	13	58	44.883	38.0085	22.9701	5.51	0.3	2	2020-04-19-13-58-44	2020-04-21-03-28-13	2	1	4	4	4	147	161	Detection fixed reloc	0.695
2020	4	19	14	15	49.499	38.0179	22.9501	4.52	-0.1	2	2020-04-19-14-15-49	2020-04-27-04-53-51	2	1	110	121	134	153	174	Detection fixed reloc	0.68
2020	4	19	14	16	46.933	38.0249	22.9602	6.75	-1	2	2020-04-19-14-16-46	2020-04-03-09-36-54	2	1	4	98	106	120	132	Detection fixed reloc	0.779
2020	4	19	14	24	55.685	38.0294	22.9829	6.1	-0.4	2	2020-04-19-14-24-55	2020-04-21-15-58-52	2	1	113	125	138	157	179	Detection fixed reloc	0.675
2020	4	19	14	57	9.836	38.0525	22.9061	11.36	-0.4	2	2020-04-19-14-57-09	2020-04-28-02-43-29	18	2	27	29	31	36	41	Detection fixed reloc	0.65
2020	4	19	15	13	3.169	38.0734	22.9095	5.35	-0.4	2	2020-04-19-15-13-03	2020-05-23-02-13-42	2	2	70	75	80	91	98	Detection fixed reloc	0.74
2020	4	19	15	28	44.91	38.0374	22.9603	6.56	-0.5	2	2020-04-19-15-28-44	2020-04-13-13-58-38	2	1	95	104	128	144	158	Detection fixed reloc	0.724
2020	4	19	15	31	10.741	38.0427	22.9601	6.21	-0.4	2	2020-04-19-15-31-10	2020-04-04-01-45-18	2	1	4	98	106	141	155	Detection fixed reloc	0.667
2020	4	19	16	24	9.261	38.0427	22.9601	6.21	0.1	2	2020-04-19-16-24-09	2020-04-04-01-45-18	2	1	4	98	106	141	155	Detection fixed reloc	0.682
2020	4	19	16	38	49.201	38.0427	22.9601	6.21	-0.2	2	2020-04-19-16-38-49	2020-04-04-01-45-18	2	1	4	98	106	141	155	Detection fixed reloc	0.798
2020	4	19	18	23	51.345	38.0345	22.9682	6.63	-0.1	2	2020-04-19-18-23-51	2020-04-05-02-42-13	2	1	4	98	106	120	129	Detection fixed reloc	0.678
2020	4	19	18	30	15.053	38.0898	22.8371	12.08	0.9	2	2020-04-19-18-30-15	2021-01-20-10-41-41	5	4	11	100	108	122	131	Detection fixed reloc	0.705
2020	4	19	18	46	41.171	38.024	23.001	3.76	-0.1	2	2020-04-19-18-46-41	2020-04-24-18-58-43	2	1	113	125	138	157	175	Detection fixed reloc	0.64
2020	4	19	19	15	12.485	38.0294	22.9829	6.1	0.3	2	2020-04-19-19-15-12	2020-04-21-15-58-52	2	1	113	125	138	157	179	Detection fixed reloc	0.78
2020	4	19	19	26	20.305	38.0294	22.9829	6.1	-0.4	2	2020-04-19-19-26-20	2020-04-21-15-58-52	2	1	113	125	138	157	179	Detection fixed reloc	0.78
2020	4	19	19	28	44.285	38.034	22.9858	5.99	0.1	2	2020-04-19-19-28-44	2020-04-09-20-45-49	2	1	105	116	126	142	156	Detection fixed reloc	0.676
2020	4	19	19	54	56.325	38.0294	22.9829	6.1	0.7	2	2020-04-19-19-54-56	2020-04-21-15-58-52	2	1	113	125	138	157	179	Detection fixed reloc	0.669
2020	4	19	20	5	41.343	38.0085	22.9701	5.51	0.3	2	2020-04-19-20-05-41	2020-04-21-03-28-13	2	1	4	4	4	147	161	Detection fixed reloc	0.617
2020	4	19	20	34	42.213	38.0249	22.9602	6.75	-0.7	2	2020-04-19-20-34-42	2020-04-03-09-36-54	2	1	4	98	106	120	132	Detection fixed reloc	0.667
2020	4	19	20	53	26.969	38.0734	22.9095	5.35	-0.4	2	2020-04-19-20-53-26	2020-05-23-02-13-42	2	2	70	75	80	91	98	Detection fixed reloc	0.636
2020	4	19	20	56	19.691	38.024	23.001	3.76	-0.3	2	2020-04-19-20-56-19	2020-04-24-18-58-43	2	1	113	125	138	157	175	Detection fixed reloc	0.608
2020	4	19	21	47	5.385	38.0294	22.9829	6.1	-0.2	2	2020-04-19-21-47-05	2020-04-21-15-58-52	2	1	113	125	138	157	179	Detection fixed reloc	0.767
2020	4	19	22	11	26.911	38.024	23.001	3.76	-0.2	2	2020-04-19-22-11-26	2020-04-24-18-58-43	2	1	113	125	138	157	175	Detection fixed reloc	0.644
2020	4	19	22	18	37.831	38.024	23.001	3.76	-0.3	2	2020-04-19-22-18-37	2020-04-24-18-58-43	2	1	113	125	138	157	175	Detection fixed reloc	0.677
2020	4	19	22	34	53.771	38.024	23.001	3.76	0.1	2	2020-04-19-22-34-53	2020-04-24-18-58-43	2	1	113	125	138	157	175	Detection fixed reloc	0.607
2020	4	19	22	36	54.671	38.024	23.001	3.76	0.3	2	2020-04-19-22-36-54	2020-04-24-18-58-43	2	1	113	125	138	157	175	Detection fixed reloc	0.638
2020	4	19	22	54	50.808	38.0513	22.88	9.67	0.7	2	2020-04-19-22-54-50	2020-07-20-13-23-01	2	3	80	85	91	165	186	Detection fixed reloc	0.606
2020	4	19	22	58	49.116	38.0525	22.9061	11.36	0.1	2	2020-04-19-22-58-49	2020-04-28-02-43-29	18	2	27	29	31	36	41	Detection fixed reloc	0.892
2020	4	19	23	22	0.204002	38.0342	22.964	6.29	-0.7	2	2020-04-19-23-22-00	2020-04-14-04-53-28	2	1	4	4	4	147	161	Detection fixed reloc	0.814
2020	4	20	0	10	59.351	38.024	23.001	3.76	-0.3	2	2020-04-20-00-10-59	2020-04-24-18-58-43	2	1	113	125	138	157	175	Detection fixed reloc	0.614
2020	4	20	0	50	50.641	38.0427	22.9601	6.21	0.1	2	2020-04-20-00-50-50	2020-04-04-01-45-18	2	1	4	98	106	141	155	Detection fixed reloc	0.679
2020	4	20	1	0	49.87	38.0374	22.9603	6.56	-0.9	2	2020-04-20-01-00-49	2020-04-13-13-58-38	2	1	95	104	128	144	158	Detection fixed reloc	0.771
2020	4	20	1	14	35.527	38.0248	22.9667	6.84	-0.6	2	2020-04-20-01-14-35	2020-05-09-05-42-20	2	1	95	104	128	144	170	Detection fixed reloc	0.728
2020	4	20	1	18	13.011	38.1696	22.7114	11.08	0.9	2	2020-04-20-01-18-13	2021-04-25-08-49-00	88	6	118	131	145	166	187	Detection fixed reloc	0.799
2020	4	20	1	19	24.285	38.0294	22.9829	6.1	-0.8	2	2020-04-20-01-19-24	2020-04-21-15-58-52	2	1	113	125	138	157	179	Detection fixed reloc	0.857
2020	4	20	1	47	9.876	38.0525	22.9061	11.36	-0.4	2	2020-04-20-01-47-09	2020-04-28-02-43-29	18	2	27	29	31	36	41	Detection fixed reloc	0.694
2020	4	20	2	28	52.205	38.0294	22.9829	6.1	-0.5	2	2020-04-20-02-28-52	2020-04-21-15-58-52	2	1	113	125	138	157	179	Detection fixed reloc	0.746
2020	4	20	2	31	17.345	38.0345	22.9682	6.63	-1	2	2020-04-20-02-31-17	2020-04-05-02-42-13	2	1	4	98	106	120	129	Detection fixed reloc	0.808
2020	4	20	2	32	42.365	38.0345	22.9682	6.63	0.6	2	2020-04-20-02-32-42	2020-04-05-02-42-13	2	1	4	98	106	120	129	Detection fixed reloc	0.85
2020	4	20	2	35	37.256	38.0525	22.9061	11.36	-0.5	2	2020-04-20-02-35-37	2020-04-28-02-43-29	18	2	27	29	31	36	41	Detection fixed reloc	0.653
2020	4	20	2	56	29.181	38.0427	22.9601	6.21	-0.1	2	2020-04-20-02-56-29	2020-04-04-01-45-18	2	1	4	98	106	141	155	Detection fixed reloc	0.68
2020	4	20	3	4	40.971	38.024	23.001	3.76	-0.3	2	2020-04-20-03-04-40	2020-04-24-18-58-43	2	1	113	125	138	157	175	Detection fixed reloc	0.642
2020	4	20	3	6	6.709	38.026	22.961	4.87	-0.2	2	2020-04-20-03-06-06	2020-05-03-09-56-04	2	1	35	96	104	118	127	Detection fixed reloc	0.606
2020	4	20	3	13	47.189	38.0632	22.9297	7.05	-0.3	2	2020-04-20-03-13-47	2020-05-15-15-41-15	2	2	24	26	28	32	36	Detection fixed reloc	0.621
2020	4	20	3	22	56.149	38.0632	22.9297	7.05	-0.7	2	2020-04-20-03-22-56	2020-05-15-15-41-15	2	2	24	26	28	32	36	Detection fixed reloc	0.633
2020	4	20	3	34	56.699	38.0179	22.9501	4.52	-0.4	2	2020-04-20-03-34-56	2020-04-27-04-53-51	2	1	110	121	134	153	174	Detection fixed reloc	0.679
2020	4	20	3	42	5.381	38.0427	22.9601	6.21	0.1	2	2020-04-20-03-42-05	2020-04-04-01-45-18	2	1	4	98	106	141	155	Detection fixed reloc	0.673
2020	4	20	4	8	38.65	38.0374	22.9603	6.56	-0.5	2	2020-04-20-04-08-38	2020-04-13-13-58-38	2	1	95	104	128	144	158	Detection fixed reloc	0.758
2020	4	20	4	40	37.578	38.0536	22.9344	7.23	0	2	2020-04-20-04-40-37	2020-07-07-19-23-21	2	2	94	103	111	125	183	Detection fixed reloc	0.605
2020	4	20	5	7	27.665	38.0294	22.9829	6.1	-0.9	2	2020-04-20-05-07-27	2020-04-21-15-58-52	2	1	113	125	138	157	179	Detection fixed reloc	0.835
2020	4	20	5	32	13.412	38.0305	22.9753	5.48	1.3	2	2020-04-20-05-32-13	2020-04-26-20-24-30	89	1	43	132	146	167	188	Detection fixed reloc	0.836
2020	4	20	5	36	3.021	38.0427	22.9601	6.21	-0.5	2	2020-04-20-05-36-03	2020-04-04-01-45-18	2	1	4	98	106	141	155	Detection fixed reloc	0.684
2020	4	20	6	10	44.351	38.024	23.001	3.76	-0.1	2	2020-04-20-06-10-44	2020-04-24-18-58-43	2	1	113	125	138	157	175	Detection fixed reloc	0.666
2020	4	20	6	15	21.229	38.0734	22.9095	5.35	0	2	2020-04-20-06-15-21	2020-05-23-02-13-42	2	2	70	75	80	91	98	Detection fixed reloc	0.647
2020	4	20	6	15	41.149	38.0632	22.9297	7.05	-0.6	2	2020-04-20-06-15-41	2020-05-15-15-41-15	2	2	24	26	28	32	36	Detection fixed reloc	0.781
2020	4	20	6	25	52.739	38.0834	22.9578	4.66	1.1	1	2020-04-20-06-25-53	2020-04-20-06-25-53	80	1	109	120	132	151	167	Template reloc	1
2020	4	20	6	29	59.944	38.0342	22.964	6.29	-0.5	2	2020-04-20-06-29-59	2020-04-14-04-53-28	2	1	4	4	4	147	161	Detection fixed reloc	0.615
2020	4	20	6	33	4.129	38.0834	22.9578	4.66	-0.4	2	2020-04-20-06-33-04	2020-04-20-06-25-53	80	1	109	120	132	151	167	Detection fixed reloc	0.664
2020	4	20	6	38	17.478	38.0531	22.9366	7.14	0.7	2	2020-04-20-06-38-17	2020-05-12-14-58-08	2	2	94	103	111	125	183	Detection fixed reloc	0.604
2020	4	20	6	46	40.725	38.0294	22.9829	6.1	0.3	2	2020-04-20-06-46-40	2020-04-21-15-58-52	2	1	113	125	138	157	179	Detection fixed reloc	0.603
2020	4	20	6	54	17.705	38.0294	22.9829	6.1	-0.1	2	2020-04-20-06-54-17	2020-04-21-15-58-52	2	1	113	125	138	157	179	Detection fixed reloc	0.603
2020	4	20	7	1	21.15	38.0374	22.9603	6.56	-1.3	2	2020-04-20-07-01-21	2020-04-13-13-58-38	2	1	95	104	128	144	158	Detection fixed reloc	0.835
2020	4	20	7	5	51.485	38.0294	22.9829	6.1	0.2	2	2020-04-20-07-05-51	2020-04-21-15-58-52	2	1	113	125	138	157	179	Detection fixed reloc	0.769
2020	4	20	7	8	5.605	38.0345	22.9682	6.63	0	2	2020-04-20-07-08-05	2020-04-05-02-42-13	2	1	4	98	106	120	129	Detection fixed reloc	0.652
2020	4	20	7	14	21.921	38.0427	22.9601	6.21	1	2	2020-04-20-07-14-21	2020-04-04-01-45-18	2	1	4	98	106	141	155	Detection fixed reloc	0.702
2020	4	20	7	25	1.755	38.0384	22.9804	5.9	-0.2	2	2020-04-20-07-25-01	2020-05-15-13-13-55	83	1	110	124	137	156	173	Detection fixed reloc	0.606
2020	4	20	7	40	35.279	38.0179	22.9501	4.52	-0.3	2	2020-04-20-07-40-35	2020-04-27-04-53-51	2	1	110	121	134	153	174	Detection fixed reloc	0.675
2020	4	20	8	10	39.57	38.1899	22.5415	7.63	0.4	2	2020-04-20-08-10-39	2020-04-20-16-36-32	90	10	119	133	147	168	189	Detection fixed reloc	0.856
2020	4	20	8	19	54.981	38.0427	22.9601	6.21	-0.1	2	2020-04-20-08-19-54	2020-04-04-01-45-18	2	1	4	98	106	141	155	Detection fixed reloc	0.658
2020	4	20	8	24	6.105	38.0294	22.9829	6.1	-0.2	2	2020-04-20-08-24-06	2020-04-21-15-58-52	2	1	113	125	138	157	179	Detection fixed reloc	0.673
2020	4	20	8	58	55.491	38.024	23.001	3.76	-0.3	2	2020-04-20-08-58-55	2020-04-24-18-58-43	2	1	113	125	138	157	175	Detection fixed reloc	0.644
2020	4	20	9	14	55.065	38.0345	22.9682	6.63	-0.2	2	2020-04-20-09-14-55	2020-04-05-02-42-13	2	1	4	98	106	120	129	Detection fixed reloc	0.701
2020	4	20	9	25	6.609	38.026	22.961	4.87	-0.2	2	2020-04-20-09-25-06	2020-05-03-09-56-04	2	1	35	96	104	118	127	Detection fixed reloc	0.6
2020	4	20	9	27	48.651	38.024	23.001	3.76	0.9	2	2020-04-20-09-27-48	2020-04-24-18-58-43	2	1	113	125	138	157	175	Detection fixed reloc	0.634
2020	4	20	10	0	12.889	38.0734	22.9095	5.35	-0.2	2	2020-04-20-10-00-12	2020-05-23-02-13-42	2	2	70	75	80	91	98	Detection fixed reloc	0.682
2020	4	20	10	18	10.193	38.0249	22.9602	6.75	-0.6	2	2020-04-20-10-18-10	2020-04-03-09-36-54	2	1	4	98	106	120	132	Detection fixed reloc	0.751
2020	4	20	10	45	34.272	38.0305	22.9753	5.48	-0.2	2	2020-04-20-10-45-34	2020-04-26-20-24-30	89	1	43	132	146	167	188	Detection fixed reloc	0.616
2020	4	20	10	59	13.431	38.024	23.001	3.76	-0.2	2	2020-04-20-10-59-13	2020-04-24-18-58-43	2	1	113	125	138	157	175	Detection fixed reloc	0.638
2020	4	20	11	12	12.725	38.0294	22.9829	6.1	-0.2	2	2020-04-20-11-12-12	2020-04-21-15-58-52	2	1	113	125	138	157	179	Detection fixed reloc	0.679
2020	4	20	11	13	47.007	38.1057	22.7916	11.25	0.3	2	2020-04-20-11-13-47	2020-05-20-02-45-42	5	4	87	92	148	169	190	Detection fixed reloc	0.663
2020	4	20	11	17	7.505	38.0294	22.9829	6.1	0.5	2	2020-04-20-11-17-07	2020-04-21-15-58-52	2	1	113	125	138	157	179	Detection fixed reloc	0.611
2020	4	20	11	41	52.005	38.0294	22.9829	6.1	0.5	2	2020-04-20-11-41-52	2020-04-21-15-58-52	2	1	113	125	138	157	179	Detection fixed reloc	0.894
2020	4	20	11	49	0.745003	38.0294	22.9829	6.1	0	2	2020-04-20-11-49-00	2020-04-21-15-58-52	2	1	113	125	138	157	179	Detection fixed reloc	0.651
2020	4	20	11	52	24.265	38.0294	22.9829	6.1	-0.1	2	2020-04-20-11-52-24	2020-04-21-15-58-52	2	1	113	125	138	157	179	Detection fixed reloc	0.621
2020	4	20	12	6	41.241	38.0427	22.9601	6.21	-0.4	2	2020-04-20-12-06-41	2020-04-04-01-45-18	2	1	4	98	106	141	155	Detection fixed reloc	0.701
2020	4	20	12	14	19.373	38.0249	22.9602	6.75	0.6	2	2020-04-20-12-14-19	2020-04-03-09-36-54	2	1	4	98	106	120	132	Detection fixed reloc	0.676
2020	4	20	12	45	34.425	38.0294	22.9829	6.1	-0.6	2	2020-04-20-12-45-34	2020-04-21-15-58-52	2	1	113	125	138	157	179	Detection fixed reloc	0.745
2020	4	20	12	58	51.578	38.0531	22.9366	7.14	-0.1	2	2020-04-20-12-58-51	2020-05-12-14-58-08	2	2	94	103	111	125	183	Detection fixed reloc	0.601
2020	4	20	13	10	26.63	38.0365	22.9858	5.97	-0.1	2	2020-04-20-13-10-26	2020-04-23-06-19-30	87	1	117	130	144	163	184	Detection fixed reloc	0.721
2020	4	20	13	26	53.509	38.0834	22.9578	4.66	-0.3	2	2020-04-20-13-26-53	2020-04-20-06-25-53	80	1	109	120	132	151	167	Detection fixed reloc	0.736
2020	4	20	13	30	17.209	38.0734	22.9095	5.35	-0.1	2	2020-04-20-13-30-17	2020-05-23-02-13-42	2	2	70	75	80	91	98	Detection fixed reloc	0.62
2020	4	20	13	33	29.261	38.0427	22.9601	6.21	0.1	2	2020-04-20-13-33-29	2020-04-04-01-45-18	2	1	4	98	106	141	155	Detection fixed reloc	0.657
2020	4	20	13	45	6.509	38.0834	22.9578	4.66	-0.4	2	2020-04-20-13-45-06	2020-04-20-06-25-53	80	1	109	120	132	151	167	Detection fixed reloc	0.635
2020	4	20	13	51	16.309	38.0632	22.9297	7.05	-0.8	2	2020-04-20-13-51-16	2020-05-15-15-41-15	2	2	24	26	28	32	36	Detection fixed reloc	0.767
2020	4	20	13	53	27.544	38.0342	22.964	6.29	-0.5	2	2020-04-20-13-53-27	2020-04-14-04-53-28	2	1	4	4	4	147	161	Detection fixed reloc	0.688
2020	4	20	14	22	34.905	38.0294	22.9829	6.1	0	2	2020-04-20-14-22-34	2020-04-21-15-58-52	2	1	113	125	138	157	179	Detection fixed reloc	0.89
2020	4	20	14	50	6.945	38.0294	22.9829	6.1	-0.2	2	2020-04-20-14-50-06	2020-04-21-15-58-52	2	1	113	125	138	157	179	Detection fixed reloc	0.773
2020	4	20	15	24	1.331	38.024	23.001	3.76	0.6	2	2020-04-20-15-24-01	2020-04-24-18-58-43	2	1	113	125	138	157	175	Detection fixed reloc	0.727
2020	4	20	15	24	32.431	38.024	23.001	3.76	-0.2	2	2020-04-20-15-24-32	2020-04-24-18-58-43	2	1	113	125	138	157	175	Detection fixed reloc	0.608
2020	4	20	15	39	19.005	38.0294	22.9829	6.1	-0.5	2	2020-04-20-15-39-19	2020-04-21-15-58-52	2	1	113	125	138	157	179	Detection fixed reloc	0.744
2020	4	20	15	41	24.785	38.0294	22.9829	6.1	-0.2	2	2020-04-20-15-41-24	2020-04-21-15-58-52	2	1	113	125	138	157	179	Detection fixed reloc	0.704
2020	4	20	15	46	4.23	38.1899	22.5415	7.63	0.5	2	2020-04-20-15-46-04	2020-04-20-16-36-32	90	10	119	133	147	168	189	Detection fixed reloc	0.685
2020	4	20	16	3	32.305	38.0294	22.9829	6.1	-0.7	2	2020-04-20-16-03-32	2020-04-21-15-58-52	2	1	113	125	138	157	179	Detection fixed reloc	0.777
2020	4	20	16	25	39.309	38.0734	22.9095	5.35	0.1	2	2020-04-20-16-25-39	2020-05-23-02-13-42	2	2	70	75	80	91	98	Detection fixed reloc	0.787
2020	4	20	16	28	52.849	38.0734	22.9095	5.35	-0.2	2	2020-04-20-16-28-52	2020-05-23-02-13-42	2	2	70	75	80	91	98	Detection fixed reloc	0.702
2020	4	20	16	30	47.749	38.0734	22.9095	5.35	0	2	2020-04-20-16-30-47	2020-05-23-02-13-42	2	2	70	75	80	91	98	Detection fixed reloc	0.771
2020	4	20	16	36	32.21	38.1899	22.5415	7.63	1.3	1	2020-04-20-16-36-32	2020-04-20-16-36-32	90	10	119	133	147	168	189	Template reloc	1
2020	4	20	16	38	48.03	38.1899	22.5415	7.63	1.1	2	2020-04-20-16-38-48	2020-04-20-16-36-32	90	10	119	133	147	168	189	Detection fixed reloc	0.844
2020	4	20	16	42	35.891	38.024	23.001	3.76	1	2	2020-04-20-16-42-35	2020-04-24-18-58-43	2	1	113	125	138	157	175	Detection fixed reloc	0.66
2020	4	20	16	43	54.241	38.0427	22.9601	6.21	-0.6	2	2020-04-20-16-43-54	2020-04-04-01-45-18	2	1	4	98	106	141	155	Detection fixed reloc	0.679
2020	4	20	16	56	37.541	38.0427	22.9601	6.21	1.3	2	2020-04-20-16-56-37	2020-04-04-01-45-18	2	1	4	98	106	141	155	Detection fixed reloc	0.68
2020	4	20	16	59	8.689	38.0734	22.9095	5.35	-0.3	2	2020-04-20-16-59-08	2020-05-23-02-13-42	2	2	70	75	80	91	98	Detection fixed reloc	0.781
2020	4	20	17	2	7.588	38.1875	22.5753	12.94	0.4	2	2020-04-20-17-02-07	2020-11-16-19-57-11	91	10	120	134	149	170	191	Detection fixed reloc	0.773
2020	4	20	17	17	34.53	38.0374	22.9603	6.56	-0.5	2	2020-04-20-17-17-34	2020-04-13-13-58-38	2	1	95	104	128	144	158	Detection fixed reloc	0.666
2020	4	20	17	26	4.069	38.0734	22.9095	5.35	-0.5	2	2020-04-20-17-26-04	2020-05-23-02-13-42	2	2	70	75	80	91	98	Detection fixed reloc	0.816
2020	4	20	17	28	21.521	38.0427	22.9601	6.21	-0.1	2	2020-04-20-17-28-21	2020-04-04-01-45-18	2	1	4	98	106	141	155	Detection fixed reloc	0.694
2020	4	20	17	45	4.878	38.0283	22.9468	8.52	-0.3	2	2020-04-20-17-45-04	2020-05-16-19-57-00	2	1	24	26	95	109	117	Detection fixed reloc	0.61
2020	4	20	17	45	49.191	38.024	23.001	3.76	0.6	2	2020-04-20-17-45-49	2020-04-24-18-58-43	2	1	113	125	138	157	175	Detection fixed reloc	0.763
2020	4	20	17	49	2.317	38.0175	22.9372	11.51	0.4	2	2020-04-20-17-49-02	2020-08-15-01-51-15	17	1	26	28	30	35	39	Detection fixed reloc	0.622
2020	4	20	17	50	31.971	38.024	23.001	3.76	0	2	2020-04-20-17-50-31	2020-04-24-18-58-43	2	1	113	125	138	157	175	Detection fixed reloc	0.602
2020	4	20	17	51	44.39	38.0374	22.9603	6.56	-1	2	2020-04-20-17-51-44	2020-04-13-13-58-38	2	1	95	104	128	144	158	Detection fixed reloc	0.769
2020	4	20	17	52	59.499	38.0179	22.9501	4.52	-0.7	2	2020-04-20-17-52-59	2020-04-27-04-53-51	2	1	110	121	134	153	174	Detection fixed reloc	0.653
2020	4	20	18	2	33.201	38.0427	22.9601	6.21	-0.3	2	2020-04-20-18-02-33	2020-04-04-01-45-18	2	1	4	98	106	141	155	Detection fixed reloc	0.658
2020	4	20	18	15	53.421	38.0427	22.9601	6.21	-0.1	2	2020-04-20-18-15-53	2020-04-04-01-45-18	2	1	4	98	106	141	155	Detection fixed reloc	0.679
2020	4	20	18	36	17.651	38.024	23.001	3.76	-0.6	2	2020-04-20-18-36-17	2020-04-24-18-58-43	2	1	113	125	138	157	175	Detection fixed reloc	0.711
2020	4	20	18	42	10.551	38.024	23.001	3.76	-0.1	2	2020-04-20-18-42-10	2020-04-24-18-58-43	2	1	113	125	138	157	175	Detection fixed reloc	0.623
2020	4	20	19	15	40.75	38.0374	22.9603	6.56	-0.4	2	2020-04-20-19-15-40	2020-04-13-13-58-38	2	1	95	104	128	144	158	Detection fixed reloc	0.681
2020	4	20	19	22	7.965	38.0345	22.9682	6.63	0.3	2	2020-04-20-19-22-07	2020-04-05-02-42-13	2	1	4	98	106	120	129	Detection fixed reloc	0.631
2020	4	20	19	37	46.611	38.024	23.001	3.76	-0.3	2	2020-04-20-19-37-46	2020-04-24-18-58-43	2	1	113	125	138	157	175	Detection fixed reloc	0.758
2020	4	20	20	2	36.956	38.0525	22.9061	11.36	0.1	2	2020-04-20-20-02-36	2020-04-28-02-43-29	18	2	27	29	31	36	41	Detection fixed reloc	0.629
2020	4	20	20	18	29.285	38.0294	22.9829	6.1	0	2	2020-04-20-20-18-29	2020-04-21-15-58-52	2	1	113	125	138	157	179	Detection fixed reloc	0.686
2020	4	20	20	24	30.211	38.024	23.001	3.76	0	2	2020-04-20-20-24-30	2020-04-24-18-58-43	2	1	113	125	138	157	175	Detection fixed reloc	0.621
2020	4	20	20	42	9.451	38.024	23.001	3.76	-0.4	2	2020-04-20-20-42-09	2020-04-24-18-58-43	2	1	113	125	138	157	175	Detection fixed reloc	0.827
2020	4	20	20	49	3.67	38.0374	22.9603	6.56	-0.2	2	2020-04-20-20-49-03	2020-04-13-13-58-38	2	1	95	104	128	144	158	Detection fixed reloc	0.705
2020	4	20	20	57	28.061	38.0427	22.9601	6.21	0	2	2020-04-20-20-57-28	2020-04-04-01-45-18	2	1	4	98	106	141	155	Detection fixed reloc	0.659
2020	4	20	20	58	8.881	38.0427	22.9601	6.21	-0.4	2	2020-04-20-20-58-08	2020-04-04-01-45-18	2	1	4	98	106	141	155	Detection fixed reloc	0.665
2020	4	20	21	2	50.129	38.0734	22.9095	5.35	-0.4	2	2020-04-20-21-02-50	2020-05-23-02-13-42	2	2	70	75	80	91	98	Detection fixed reloc	0.747
2020	4	20	21	15	45.35	38.0374	22.9603	6.56	0.1	2	2020-04-20-21-15-45	2020-04-13-13-58-38	2	1	95	104	128	144	158	Detection fixed reloc	0.67
2020	4	20	21	17	54.291	38.024	23.001	3.76	-0.1	2	2020-04-20-21-17-54	2020-04-24-18-58-43	2	1	113	125	138	157	175	Detection fixed reloc	0.687
2020	4	20	21	28	54.585	38.1184	22.7054	13.08	0.5	2	2020-04-20-21-28-54	2021-02-12-06-41-44	65	8	92	135	150	171	192	Detection fixed reloc	0.639
2020	4	20	21	30	54.738	38.0127	22.9802	5.38	0.2	2	2020-04-20-21-30-54	2020-04-21-21-47-45	92	1	70	136	151	172	193	Detection fixed reloc	0.632
2020	4	20	21	54	33.191	38.024	23.001	3.76	0.3	2	2020-04-20-21-54-33	2020-04-24-18-58-43	2	1	113	125	138	157	175	Detection fixed reloc	0.908
2020	4	20	22	0	38.965	38.0294	22.9829	6.1	0.5	2	2020-04-20-22-00-38	2020-04-21-15-58-52	2	1	113	125	138	157	179	Detection fixed reloc	0.782
2020	4	20	22	2	52.291	38.024	23.001	3.76	0	2	2020-04-20-22-02-52	2020-04-24-18-58-43	2	1	113	125	138	157	175	Detection fixed reloc	0.745
2020	4	20	22	7	18.411	38.024	23.001	3.76	-0.1	2	2020-04-20-22-07-18	2020-04-24-18-58-43	2	1	113	125	138	157	175	Detection fixed reloc	0.724
2020	4	20	22	11	22.285	38.0294	22.9829	6.1	-0.2	2	2020-04-20-22-11-22	2020-04-21-15-58-52	2	1	113	125	138	157	179	Detection fixed reloc	0.626
2020	4	20	22	18	15.551	38.024	23.001	3.76	-0.4	2	2020-04-20-22-18-15	2020-04-24-18-58-43	2	1	113	125	138	157	175	Detection fixed reloc	0.862
2020	4	20	22	25	38.263	38.0085	22.9701	5.51	-0.9	2	2020-04-20-22-25-38	2020-04-21-03-28-13	2	1	4	4	4	147	161	Detection fixed reloc	0.803
2020	4	20	22	40	4.251	38.024	23.001	3.76	-0.6	2	2020-04-20-22-40-04	2020-04-24-18-58-43	2	1	113	125	138	157	175	Detection fixed reloc	0.85
2020	4	20	23	0	44.259	38.0179	22.9501	4.52	0.1	2	2020-04-20-23-00-44	2020-04-27-04-53-51	2	1	110	121	134	153	174	Detection fixed reloc	0.655
2020	4	20	23	1	36.921	38.0427	22.9601	6.21	0.3	2	2020-04-20-23-01-36	2020-04-04-01-45-18	2	1	4	98	106	141	155	Detection fixed reloc	0.689
2020	4	20	23	26	36.391	38.024	23.001	3.76	0.4	2	2020-04-20-23-26-36	2020-04-24-18-58-43	2	1	113	125	138	157	175	Detection fixed reloc	0.626
2020	4	21	0	1	7.805	38.0294	22.9829	6.1	-0.4	2	2020-04-21-00-01-07	2020-04-21-15-58-52	2	1	113	125	138	157	179	Detection fixed reloc	0.799
2020	4	21	0	5	8.616	38.0525	22.9061	11.36	-0.4	2	2020-04-21-00-05-08	2020-04-28-02-43-29	18	2	27	29	31	36	41	Detection fixed reloc	0.707
2020	4	21	0	29	54.301	38.0427	22.9601	6.21	0.1	2	2020-04-21-00-29-54	2020-04-04-01-45-18	2	1	4	98	106	141	155	Detection fixed reloc	0.689
2020	4	21	0	40	24.77	38.0374	22.9603	6.56	0.1	2	2020-04-21-00-40-24	2020-04-13-13-58-38	2	1	95	104	128	144	158	Detection fixed reloc	0.678
2020	4	21	0	45	16.877	38.0306	22.9651	6.84	-0.1	2	2020-04-21-00-45-16	2020-04-03-09-15-41	2	1	4	98	106	120	132	Detection fixed reloc	0.69
2020	4	21	0	47	58.939	38.0179	22.9501	4.52	-0.6	2	2020-04-21-00-47-58	2020-04-27-04-53-51	2	1	110	121	134	153	174	Detection fixed reloc	0.736
2020	4	21	0	58	13.969	38.0632	22.9297	7.05	-0.5	2	2020-04-21-00-58-13	2020-05-15-15-41-15	2	2	24	26	28	32	36	Detection fixed reloc	0.674
2020	4	21	1	0	7.679	38.0179	22.9501	4.52	0.3	2	2020-04-21-01-00-07	2020-04-27-04-53-51	2	1	110	121	134	153	174	Detection fixed reloc	0.746
2020	4	21	1	20	46.965	38.0294	22.9829	6.1	-0.2	2	2020-04-21-01-20-46	2020-04-21-15-58-52	2	1	113	125	138	157	179	Detection fixed reloc	0.739
2020	4	21	2	17	16.384	38.2826	22.7324	4.15	1	2	2020-04-21-02-17-16	2020-04-21-23-59-35	93	7	121	137	152	173	194	Detection fixed reloc	0.827
2020	4	21	2	25	52.165	38.0345	22.9682	6.63	-0.4	2	2020-04-21-02-25-52	2020-04-05-02-42-13	2	1	4	98	106	120	129	Detection fixed reloc	0.64
2020	4	21	2	31	31.351	38.024	23.001	3.76	-0.1	2	2020-04-21-02-31-31	2020-04-24-18-58-43	2	1	113	125	138	157	175	Detection fixed reloc	0.637
2020	4	21	2	34	8.394	38.0456	22.9417	8.07	0.2	2	2020-04-21-02-34-08	2020-05-22-18-58-33	2	1	94	103	111	125	136	Detection fixed reloc	0.625
2020	4	21	3	6	38.381	38.0427	22.9601	6.21	0	2	2020-04-21-03-06-38	2020-04-04-01-45-18	2	1	4	98	106	141	155	Detection fixed reloc	0.669
2020	4	21	3	28	12.243	38.0085	22.9701	5.51	1.6	1	2020-04-21-03-28-13	2020-04-21-03-28-13	2	1	4	4	4	147	161	Template reloc	1
2020	4	21	3	31	15.404	38.0342	22.964	6.29	-0.3	2	2020-04-21-03-31-15	2020-04-14-04-53-28	2	1	4	4	4	147	161	Detection fixed reloc	0.621
2020	4	21	3	41	17.311	38.024	23.001	3.76	-0.1	2	2020-04-21-03-41-17	2020-04-24-18-58-43	2	1	113	125	138	157	175	Detection fixed reloc	0.697
2020	4	21	3	59	27.799	38.0179	22.9501	4.52	-0.7	2	2020-04-21-03-59-27	2020-04-27-04-53-51	2	1	110	121	134	153	174	Detection fixed reloc	0.719
2020	4	21	4	3	43.651	38.024	23.001	3.76	0.2	2	2020-04-21-04-03-43	2020-04-24-18-58-43	2	1	113	125	138	157	175	Detection fixed reloc	0.7
2020	4	21	4	9	32.511	38.024	23.001	3.76	-0.2	2	2020-04-21-04-09-32	2020-04-24-18-58-43	2	1	113	125	138	157	175	Detection fixed reloc	0.695
2020	4	21	4	34	58.463	38.0085	22.9701	5.51	-0.6	2	2020-04-21-04-34-58	2020-04-21-03-28-13	2	1	4	4	4	147	161	Detection fixed reloc	0.697
2020	4	21	4	44	57.431	38.024	23.001	3.76	-0.2	2	2020-04-21-04-44-57	2020-04-24-18-58-43	2	1	113	125	138	157	175	Detection fixed reloc	0.603
2020	4	21	5	6	43.471	38.024	23.001	3.76	-0.3	2	2020-04-21-05-06-43	2020-04-24-18-58-43	2	1	113	125	138	157	175	Detection fixed reloc	0.808
2020	4	21	5	13	16.349	38.0734	22.9095	5.35	-0.1	2	2020-04-21-05-13-16	2020-05-23-02-13-42	2	2	70	75	80	91	98	Detection fixed reloc	0.834
2020	4	21	5	14	6.511	38.024	23.001	3.76	-0.3	2	2020-04-21-05-14-06	2020-04-24-18-58-43	2	1	113	125	138	157	175	Detection fixed reloc	0.623
2020	4	21	5	59	15.299	38.0179	22.9501	4.52	-0.1	2	2020-04-21-05-59-15	2020-04-27-04-53-51	2	1	110	121	134	153	174	Detection fixed reloc	0.684
2020	4	21	6	6	21.661	38.0413	22.9271	5.83	0.4	2	2020-04-21-06-06-21	2020-05-19-07-37-09	15	1	21	22	23	27	28	Detection fixed reloc	0.603
2020	4	21	6	48	24.441	38.0427	22.9601	6.21	0.2	2	2020-04-21-06-48-24	2020-04-04-01-45-18	2	1	4	98	106	141	155	Detection fixed reloc	0.658
2020	4	21	7	27	39.221	38.0427	22.9601	6.21	0.7	2	2020-04-21-07-27-39	2020-04-04-01-45-18	2	1	4	98	106	141	155	Detection fixed reloc	0.662
2020	4	21	7	36	56.903	38.0085	22.9701	5.51	0.5	2	2020-04-21-07-36-56	2020-04-21-03-28-13	2	1	4	4	4	147	161	Detection fixed reloc	0.618
2020	4	21	7	52	8.321	38.0427	22.9601	6.21	0.4	2	2020-04-21-07-52-08	2020-04-04-01-45-18	2	1	4	98	106	141	155	Detection fixed reloc	0.688
2020	4	21	7	59	38.763	38.0085	22.9701	5.51	-0.1	2	2020-04-21-07-59-38	2020-04-21-03-28-13	2	1	4	4	4	147	161	Detection fixed reloc	0.647
2020	4	21	9	8	56.819	38.0179	22.9501	4.52	-0.3	2	2020-04-21-09-08-56	2020-04-27-04-53-51	2	1	110	121	134	153	174	Detection fixed reloc	0.709
2020	4	21	9	20	21.045	38.1923	22.6909	16.9	0.9	2	2020-04-21-09-20-21	2020-02-28-02-12-14	47	6	67	72	77	88	95	Detection fixed reloc	0.617
2020	4	21	9	56	7.671	38.024	23.001	3.76	0.5	2	2020-04-21-09-56-07	2020-04-24-18-58-43	2	1	113	125	138	157	175	Detection fixed reloc	0.884
2020	4	21	10	3	6.55	38.0365	22.9858	5.97	0.2	2	2020-04-21-10-03-06	2020-04-23-06-19-30	87	1	117	130	144	163	184	Detection fixed reloc	0.761
2020	4	21	10	15	44.291	38.024	23.001	3.76	0.2	2	2020-04-21-10-15-44	2020-04-24-18-58-43	2	1	113	125	138	157	175	Detection fixed reloc	0.882
2020	4	21	10	20	30.211	38.024	23.001	3.76	0	2	2020-04-21-10-20-30	2020-04-24-18-58-43	2	1	113	125	138	157	175	Detection fixed reloc	0.653
2020	4	21	10	21	7.064	38.0342	22.964	6.29	0	2	2020-04-21-10-21-07	2020-04-14-04-53-28	2	1	4	4	4	147	161	Detection fixed reloc	0.707
2020	4	21	10	21	56.447	38.0723	22.9323	8.1	0.4	2	2020-04-21-10-21-56	2020-05-24-02-51-46	2	2	52	57	61	67	73	Detection fixed reloc	0.621
2020	4	21	10	41	28.89	38.0374	22.9603	6.56	-0.2	2	2020-04-21-10-41-28	2020-04-13-13-58-38	2	1	95	104	128	144	158	Detection fixed reloc	0.704
2020	4	21	10	43	5.159	38.0179	22.9501	4.52	0.1	2	2020-04-21-10-43-05	2020-04-27-04-53-51	2	1	110	121	134	153	174	Detection fixed reloc	0.664
2020	4	21	10	43	52.907	38.0723	22.9323	8.1	-0.1	2	2020-04-21-10-43-52	2020-05-24-02-51-46	2	2	52	57	61	67	73	Detection fixed reloc	0.734
2020	4	21	10	56	29.885	38.0294	22.9829	6.1	0.3	2	2020-04-21-10-56-29	2020-04-21-15-58-52	2	1	113	125	138	157	179	Detection fixed reloc	0.823
2020	4	21	10	58	14.065	38.0294	22.9829	6.1	0.2	2	2020-04-21-10-58-14	2020-04-21-15-58-52	2	1	113	125	138	157	179	Detection fixed reloc	0.743
2020	4	21	11	2	11.479	38.0179	22.9501	4.52	-0.4	2	2020-04-21-11-02-11	2020-04-27-04-53-51	2	1	110	121	134	153	174	Detection fixed reloc	0.705
2020	4	21	11	2	46.039	38.0179	22.9501	4.52	0	2	2020-04-21-11-02-46	2020-04-27-04-53-51	2	1	110	121	134	153	174	Detection fixed reloc	0.739
2020	4	21	11	8	50.97	38.0374	22.9603	6.56	0	2	2020-04-21-11-08-50	2020-04-13-13-58-38	2	1	95	104	128	144	158	Detection fixed reloc	0.793
2020	4	21	11	19	57.698	38.0127	22.9802	5.38	0	2	2020-04-21-11-19-57	2020-04-21-21-47-45	92	1	70	136	151	172	193	Detection fixed reloc	0.781
2020	4	21	11	32	47.291	38.024	23.001	3.76	-0.1	2	2020-04-21-11-32-47	2020-04-24-18-58-43	2	1	113	125	138	157	175	Detection fixed reloc	0.822
2020	4	21	11	54	22.079	38.0179	22.9501	4.52	-0.1	2	2020-04-21-11-54-22	2020-04-27-04-53-51	2	1	110	121	134	153	174	Detection fixed reloc	0.651
2020	4	21	12	11	32.305	38.0294	22.9829	6.1	0.7	2	2020-04-21-12-11-32	2020-04-21-15-58-52	2	1	113	125	138	157	179	Detection fixed reloc	0.64
2020	4	21	13	37	9.156	38.0525	22.9061	11.36	0.1	2	2020-04-21-13-37-09	2020-04-28-02-43-29	18	2	27	29	31	36	41	Detection fixed reloc	0.753
2020	4	21	14	30	18.431	38.024	23.001	3.76	0.8	2	2020-04-21-14-30-18	2020-04-24-18-58-43	2	1	113	125	138	157	175	Detection fixed reloc	0.749
2020	4	21	14	48	21.965	38.0294	22.9829	6.1	0.1	2	2020-04-21-14-48-21	2020-04-21-15-58-52	2	1	113	125	138	157	179	Detection fixed reloc	0.805
2020	4	21	15	21	15.34	38.0769	22.9218	6.71	0.6	2	2020-04-21-15-21-15	2020-05-19-23-34-33	2	2	52	57	61	67	73	Detection fixed reloc	0.629
2020	4	21	15	34	13.405	38.0294	22.9829	6.1	0.4	2	2020-04-21-15-34-13	2020-04-21-15-58-52	2	1	113	125	138	157	179	Detection fixed reloc	0.881
2020	4	21	15	58	50.625	38.0294	22.9829	6.1	1.9	1	2020-04-21-15-58-52	2020-04-21-15-58-52	2	1	113	125	138	157	179	Template reloc	1
2020	4	21	16	2	52.065	38.0294	22.9829	6.1	-0.1	2	2020-04-21-16-02-52	2020-04-21-15-58-52	2	1	113	125	138	157	179	Detection fixed reloc	0.608
2020	4	21	16	5	48.231	38.024	23.001	3.76	0	2	2020-04-21-16-05-48	2020-04-24-18-58-43	2	1	113	125	138	157	175	Detection fixed reloc	0.747
2020	4	21	16	8	38.585	38.0294	22.9829	6.1	-0.2	2	2020-04-21-16-08-38	2020-04-21-15-58-52	2	1	113	125	138	157	179	Detection fixed reloc	0.794
2020	4	21	16	9	23.111	38.024	23.001	3.76	0	2	2020-04-21-16-09-23	2020-04-24-18-58-43	2	1	113	125	138	157	175	Detection fixed reloc	0.841
2020	4	21	16	10	41.859	38.0179	22.9501	4.52	-0.2	2	2020-04-21-16-10-41	2020-04-27-04-53-51	2	1	110	121	134	153	174	Detection fixed reloc	0.7
2020	4	21	16	12	48.625	38.0294	22.9829	6.1	0.2	2	2020-04-21-16-12-48	2020-04-21-15-58-52	2	1	113	125	138	157	179	Detection fixed reloc	0.623
2020	4	21	16	32	55.238	38.0127	22.9802	5.38	0.2	2	2020-04-21-16-32-55	2020-04-21-21-47-45	92	1	70	136	151	172	193	Detection fixed reloc	0.789
2020	4	21	16	59	17.686	38.0297	22.9875	5.63	0.9	2	2020-04-21-16-59-17	2020-04-22-20-36-31	94	1	122	138	153	174	195	Detection fixed reloc	0.655
2020	4	21	17	17	3.99	38.0374	22.9603	6.56	-0.4	2	2020-04-21-17-17-03	2020-04-13-13-58-38	2	1	95	104	128	144	158	Detection fixed reloc	0.673
2020	4	21	17	32	25.225	38.0294	22.9829	6.1	-0.2	2	2020-04-21-17-32-25	2020-04-21-15-58-52	2	1	113	125	138	157	179	Detection fixed reloc	0.745
2020	4	21	17	49	11.85	38.0374	22.9603	6.56	-0.5	2	2020-04-21-17-49-11	2020-04-13-13-58-38	2	1	95	104	128	144	158	Detection fixed reloc	0.827
2020	4	21	18	43	20.658	38.0127	22.9802	5.38	-0.1	2	2020-04-21-18-43-20	2020-04-21-21-47-45	92	1	70	136	151	172	193	Detection fixed reloc	0.913
2020	4	21	18	43	44.258	38.0127	22.9802	5.38	0	2	2020-04-21-18-43-44	2020-04-21-21-47-45	92	1	70	136	151	172	193	Detection fixed reloc	0.713
2020	4	21	18	52	11.199	38.0179	22.9501	4.52	-0.4	2	2020-04-21-18-52-11	2020-04-27-04-53-51	2	1	110	121	134	153	174	Detection fixed reloc	0.651
2020	4	21	19	20	47.181	38.0427	22.9601	6.21	-0.1	2	2020-04-21-19-20-47	2020-04-04-01-45-18	2	1	4	98	106	141	155	Detection fixed reloc	0.67
2020	4	21	19	22	27.417	38.0306	22.9651	6.84	0.3	2	2020-04-21-19-22-27	2020-04-03-09-15-41	2	1	4	98	106	120	132	Detection fixed reloc	0.62
2020	4	21	20	1	46.285	38.034	22.9858	5.99	1.2	2	2020-04-21-20-01-46	2020-04-09-20-45-49	2	1	105	116	126	142	156	Detection fixed reloc	0.631
2020	4	21	20	32	46.99	38.0374	22.9603	6.56	0.7	2	2020-04-21-20-32-46	2020-04-13-13-58-38	2	1	95	104	128	144	158	Detection fixed reloc	0.664
2020	4	21	20	32	57.711	38.024	23.001	3.76	0	2	2020-04-21-20-32-57	2020-04-24-18-58-43	2	1	113	125	138	157	175	Detection fixed reloc	0.747
2020	4	21	21	2	53.504	38.0238	22.9947	6.94	0.9	2	2020-04-21-21-02-53	2020-04-25-12-03-08	95	1	122	139	154	175	196	Detection fixed reloc	0.607
2020	4	21	21	7	13.071	38.024	23.001	3.76	0.6	2	2020-04-21-21-07-13	2020-04-24-18-58-43	2	1	113	125	138	157	175	Detection fixed reloc	0.774
2020	4	21	21	8	23.046	38.0297	22.9875	5.63	0.6	2	2020-04-21-21-08-23	2020-04-22-20-36-31	94	1	122	138	153	174	195	Detection fixed reloc	0.624
2020	4	21	21	47	44.668	38.0127	22.9802	5.38	1.9	1	2020-04-21-21-47-45	2020-04-21-21-47-45	92	1	70	136	151	172	193	Template reloc	1
2020	4	21	22	14	57.791	38.0209	22.9967	5.33	0.5	2	2020-04-21-22-14-57	2020-04-25-18-45-56	87	1	117	130	155	176	197	Detection fixed reloc	0.727
2020	4	21	22	30	5.178	38.0127	22.9802	5.38	0.4	2	2020-04-21-22-30-05	2020-04-21-21-47-45	92	1	70	136	151	172	193	Detection fixed reloc	0.659
2020	4	21	22	32	27.931	38.024	23.001	3.76	0	2	2020-04-21-22-32-27	2020-04-24-18-58-43	2	1	113	125	138	157	175	Detection fixed reloc	0.606
2020	4	21	22	57	53.951	38.024	23.001	3.76	-0.5	2	2020-04-21-22-57-53	2020-04-24-18-58-43	2	1	113	125	138	157	175	Detection fixed reloc	0.89
2020	4	21	23	59	34.424	38.2826	22.7324	4.15	2.5	1	2020-04-21-23-59-35	2020-04-21-23-59-35	93	7	121	137	152	173	194	Template reloc	1
2020	4	22	0	1	18.29	38.0374	22.9603	6.56	-0.3	2	2020-04-22-00-01-18	2020-04-13-13-58-38	2	1	95	104	128	144	158	Detection fixed reloc	0.656
2020	4	22	0	31	33.11	38.0365	22.9858	5.97	0.2	2	2020-04-22-00-31-33	2020-04-23-06-19-30	87	1	117	130	144	163	184	Detection fixed reloc	0.766
2020	4	22	0	34	26.698	38.0127	22.9802	5.38	1.6	2	2020-04-22-00-34-26	2020-04-21-21-47-45	92	1	70	136	151	172	193	Detection fixed reloc	0.701
2020	4	22	0	49	17.224	38.0342	22.964	6.29	-0.1	2	2020-04-22-00-49-17	2020-04-14-04-53-28	2	1	4	4	4	147	161	Detection fixed reloc	0.652
2020	4	22	0	55	44.23	38.0365	22.9858	5.97	0.2	2	2020-04-22-00-55-44	2020-04-23-06-19-30	87	1	117	130	144	163	184	Detection fixed reloc	0.72
2020	4	22	1	4	24.651	38.024	23.001	3.76	-0.1	2	2020-04-22-01-04-24	2020-04-24-18-58-43	2	1	113	125	138	157	175	Detection fixed reloc	0.792
2020	4	22	2	0	20.365	38.0294	22.9829	6.1	0.8	2	2020-04-22-02-00-20	2020-04-21-15-58-52	2	1	113	125	138	157	179	Detection fixed reloc	0.651
2020	4	22	2	3	24.499	38.0179	22.9501	4.52	0.2	2	2020-04-22-02-03-24	2020-04-27-04-53-51	2	1	110	121	134	153	174	Detection fixed reloc	0.662
2020	4	22	2	26	37.252	38.0305	22.9753	5.48	-0.3	2	2020-04-22-02-26-37	2020-04-26-20-24-30	89	1	43	132	146	167	188	Detection fixed reloc	0.768
2020	4	22	3	38	38.226	38.0297	22.9875	5.63	0.8	2	2020-04-22-03-38-38	2020-04-22-20-36-31	94	1	122	138	153	174	195	Detection fixed reloc	0.661
2020	4	22	3	42	48.631	38.024	23.001	3.76	1.3	2	2020-04-22-03-42-48	2020-04-24-18-58-43	2	1	113	125	138	157	175	Detection fixed reloc	0.693
2020	4	22	4	11	52.511	38.024	23.001	3.76	0.2	2	2020-04-22-04-11-52	2020-04-24-18-58-43	2	1	113	125	138	157	175	Detection fixed reloc	0.725
2020	4	22	4	14	49.09	38.0374	22.9603	6.56	-0.4	2	2020-04-22-04-14-49	2020-04-13-13-58-38	2	1	95	104	128	144	158	Detection fixed reloc	0.694
2020	4	22	4	39	25.407	38.0115	22.9747	22.4	2	1	2020-04-22-04-39-24	2020-04-22-04-39-24	96	0	123	140	156	177	198	Template loc	1
2020	4	22	4	42	53.719	38.0179	22.9501	4.52	0.5	2	2020-04-22-04-42-53	2020-04-27-04-53-51	2	1	110	121	134	153	174	Detection fixed reloc	0.765
2020	4	22	5	14	41.699	38.0179	22.9501	4.52	-0.1	2	2020-04-22-05-14-41	2020-04-27-04-53-51	2	1	110	121	134	153	174	Detection fixed reloc	0.706
2020	4	22	5	15	27.697	38.0306	22.9651	6.84	0.1	2	2020-04-22-05-15-27	2020-04-03-09-15-41	2	1	4	98	106	120	132	Detection fixed reloc	0.618
2020	4	22	6	17	3.421	38.0427	22.9601	6.21	1.1	2	2020-04-22-06-17-03	2020-04-04-01-45-18	2	1	4	98	106	141	155	Detection fixed reloc	0.658
2020	4	22	6	17	53.385	38.0294	22.9829	6.1	0.2	2	2020-04-22-06-17-53	2020-04-21-15-58-52	2	1	113	125	138	157	179	Detection fixed reloc	0.604
2020	4	22	6	29	6.111	38.024	23.001	3.76	0.1	2	2020-04-22-06-29-06	2020-04-24-18-58-43	2	1	113	125	138	157	175	Detection fixed reloc	0.696
2020	4	22	6	36	40.611	38.024	23.001	3.76	-0.2	2	2020-04-22-06-36-40	2020-04-24-18-58-43	2	1	113	125	138	157	175	Detection fixed reloc	0.632
2020	4	22	6	45	25.53	38.0374	22.9603	6.56	0.7	2	2020-04-22-06-45-25	2020-04-13-13-58-38	2	1	95	104	128	144	158	Detection fixed reloc	0.662
2020	4	22	7	31	47.371	38.024	23.001	3.76	-0.3	2	2020-04-22-07-31-47	2020-04-24-18-58-43	2	1	113	125	138	157	175	Detection fixed reloc	0.835
2020	4	22	7	41	15.003	38.0085	22.9701	5.51	0	2	2020-04-22-07-41-15	2020-04-21-03-28-13	2	1	4	4	4	147	161	Detection fixed reloc	0.692
2020	4	22	9	14	8.915	38.1762	22.7051	6.16	0.9	2	2020-04-22-09-14-08	2020-09-07-02-50-31	57	6	79	84	90	103	111	Detection fixed reloc	0.802
2020	4	22	9	48	2.958	38.0127	22.9802	5.38	-0.1	2	2020-04-22-09-48-02	2020-04-21-21-47-45	92	1	70	136	151	172	193	Detection fixed reloc	0.823
2020	4	22	9	56	12.99	38.0365	22.9858	5.97	1.1	2	2020-04-22-09-56-12	2020-04-23-06-19-30	87	1	117	130	144	163	184	Detection fixed reloc	0.629
2020	4	22	9	56	27.931	38.0209	22.9967	5.33	0.3	2	2020-04-22-09-56-27	2020-04-25-18-45-56	87	1	117	130	155	176	197	Detection fixed reloc	0.856
2020	4	22	10	8	33.484	38.2826	22.7324	4.15	1.3	2	2020-04-22-10-08-33	2020-04-21-23-59-35	93	7	121	137	152	173	194	Detection fixed reloc	0.914
2020	4	22	10	21	45.426	38.0297	22.9875	5.63	1	2	2020-04-22-10-21-45	2020-04-22-20-36-31	94	1	122	138	153	174	195	Detection fixed reloc	0.634
2020	4	22	10	22	44.944	38.0238	22.9947	6.94	0.4	2	2020-04-22-10-22-44	2020-04-25-12-03-08	95	1	122	139	154	175	196	Detection fixed reloc	0.711
2020	4	22	10	50	17.712	38.0494	22.9506	5.7	0.1	2	2020-04-22-10-50-17	2020-05-22-15-32-38	2	1	124	141	157	178	199	Detection fixed reloc	0.613
2020	4	22	11	18	36.318	38.0459	22.9449	2.78	0.1	2	2020-04-22-11-18-36	2020-05-09-00-00-51	15	1	84	89	97	111	119	Detection fixed reloc	0.608
2020	4	22	11	32	52.724	38.0342	22.964	6.29	-0.1	2	2020-04-22-11-32-52	2020-04-14-04-53-28	2	1	4	4	4	147	161	Detection fixed reloc	0.613
2020	4	22	11	38	1.321	38.0427	22.9601	6.21	0.2	2	2020-04-22-11-38-01	2020-04-04-01-45-18	2	1	4	98	106	141	155	Detection fixed reloc	0.651
2020	4	22	12	43	32.599	38.0179	22.9501	4.52	-0.4	2	2020-04-22-12-43-32	2020-04-27-04-53-51	2	1	110	121	134	153	174	Detection fixed reloc	0.676
2020	4	22	13	2	16.865	38.034	22.9858	5.99	0.7	2	2020-04-22-13-02-16	2020-04-09-20-45-49	2	1	105	116	126	142	156	Detection fixed reloc	0.666
2020	4	22	13	3	28.919	38.0179	22.9501	4.52	-0.2	2	2020-04-22-13-03-28	2020-04-27-04-53-51	2	1	110	121	134	153	174	Detection fixed reloc	0.671
2020	4	22	13	26	5.918	38.0127	22.9802	5.38	0.6	2	2020-04-22-13-26-05	2020-04-21-21-47-45	92	1	70	136	151	172	193	Detection fixed reloc	0.737
2020	4	22	13	50	34.245	38.0294	22.9829	6.1	0.7	2	2020-04-22-13-50-34	2020-04-21-15-58-52	2	1	113	125	138	157	179	Detection fixed reloc	0.668
2020	4	22	13	51	14.299	38.0179	22.9501	4.52	0.7	2	2020-04-22-13-51-14	2020-04-27-04-53-51	2	1	110	121	134	153	174	Detection fixed reloc	0.666
2020	4	22	13	56	20.824	38.2826	22.7324	4.15	1.1	2	2020-04-22-13-56-20	2020-04-21-23-59-35	93	7	121	137	152	173	194	Detection fixed reloc	0.827
2020	4	22	14	53	29.725	38.0294	22.9829	6.1	0.2	2	2020-04-22-14-53-29	2020-04-21-15-58-52	2	1	113	125	138	157	179	Detection fixed reloc	0.791
2020	4	22	15	5	3.178	38.0459	22.9449	2.78	0.1	2	2020-04-22-15-05-03	2020-05-09-00-00-51	15	1	84	89	97	111	119	Detection fixed reloc	0.616
2020	4	22	15	29	13.505	38.0294	22.9829	6.1	0.1	2	2020-04-22-15-29-13	2020-04-21-15-58-52	2	1	113	125	138	157	179	Detection fixed reloc	0.795
2020	4	22	16	22	29.19	38.0365	22.9858	5.97	0	2	2020-04-22-16-22-29	2020-04-23-06-19-30	87	1	117	130	144	163	184	Detection fixed reloc	0.751
2020	4	22	16	28	57.85	38.0365	22.9858	5.97	0.1	2	2020-04-22-16-28-57	2020-04-23-06-19-30	87	1	117	130	144	163	184	Detection fixed reloc	0.725
2020	4	22	16	50	12.267	38.0723	22.9323	8.1	0.5	2	2020-04-22-16-50-12	2020-05-24-02-51-46	2	2	52	57	61	67	73	Detection fixed reloc	0.62
2020	4	22	17	27	53.005	38.0294	22.9829	6.1	-0.1	2	2020-04-22-17-27-53	2020-04-21-15-58-52	2	1	113	125	138	157	179	Detection fixed reloc	0.721
2020	4	22	17	57	35.079	38.0179	22.9501	4.52	-0.4	2	2020-04-22-17-57-35	2020-04-27-04-53-51	2	1	110	121	134	153	174	Detection fixed reloc	0.66
2020	4	22	18	12	26.559	38.0179	22.9501	4.52	-0.3	2	2020-04-22-18-12-26	2020-04-27-04-53-51	2	1	110	121	134	153	174	Detection fixed reloc	0.676
2020	4	22	18	23	43.431	38.024	23.001	3.76	0.8	2	2020-04-22-18-23-43	2020-04-24-18-58-43	2	1	113	125	138	157	175	Detection fixed reloc	0.737
2020	4	22	19	32	50.21	38.0374	22.9603	6.56	0.3	2	2020-04-22-19-32-50	2020-04-13-13-58-38	2	1	95	104	128	144	158	Detection fixed reloc	0.672
2020	4	22	20	36	30.306	38.0297	22.9875	5.63	1.9	1	2020-04-22-20-36-31	2020-04-22-20-36-31	94	1	122	138	153	174	195	Template reloc	1
2020	4	22	20	45	45.565	38.0294	22.9829	6.1	0.5	2	2020-04-22-20-45-45	2020-04-21-15-58-52	2	1	113	125	138	157	179	Detection fixed reloc	0.741
2020	4	22	22	50	43.518	38.0127	22.9802	5.38	-0.3	2	2020-04-22-22-50-43	2020-04-21-21-47-45	92	1	70	136	151	172	193	Detection fixed reloc	0.876
2020	4	22	23	23	30.505	38.0294	22.9829	6.1	-0.5	2	2020-04-22-23-23-30	2020-04-21-15-58-52	2	1	113	125	138	157	179	Detection fixed reloc	0.885
2020	4	22	23	24	6.177	38.0175	22.9372	11.51	-0.3	2	2020-04-22-23-24-06	2020-08-15-01-51-15	17	1	26	28	30	35	39	Detection fixed reloc	0.721
2020	4	22	23	34	47.991	38.024	23.001	3.76	-0.2	2	2020-04-22-23-34-47	2020-04-24-18-58-43	2	1	113	125	138	157	175	Detection fixed reloc	0.72
2020	4	23	0	29	5.298	38.0127	22.9802	5.38	0.5	2	2020-04-23-00-29-05	2020-04-21-21-47-45	92	1	70	136	151	172	193	Detection fixed reloc	0.611
2020	4	23	0	32	52.381	38.0427	22.9601	6.21	-0.2	2	2020-04-23-00-32-52	2020-04-04-01-45-18	2	1	4	98	106	141	155	Detection fixed reloc	0.675
2020	4	23	0	34	27.218	38.0127	22.9802	5.38	1.3	2	2020-04-23-00-34-27	2020-04-21-21-47-45	92	1	70	136	151	172	193	Detection fixed reloc	0.686
2020	4	23	0	42	15.55	38.0374	22.9603	6.56	0	2	2020-04-23-00-42-15	2020-04-13-13-58-38	2	1	95	104	128	144	158	Detection fixed reloc	0.675
2020	4	23	0	44	13.085	38.0294	22.9829	6.1	0.1	2	2020-04-23-00-44-13	2020-04-21-15-58-52	2	1	113	125	138	157	179	Detection fixed reloc	0.604
2020	4	23	1	0	56.959	38.0179	22.9501	4.52	0.5	2	2020-04-23-01-00-56	2020-04-27-04-53-51	2	1	110	121	134	153	174	Detection fixed reloc	0.813
2020	4	23	1	4	26.241	38.1472	22.9618	13.11	0.2	2	2020-04-23-01-04-26	2020-03-07-12-55-08	2	2	80	85	92	106	114	Detection fixed reloc	0.662
2020	4	23	2	28	2.709	38.0734	22.9095	5.35	0	2	2020-04-23-02-28-02	2020-05-23-02-13-42	2	2	70	75	80	91	98	Detection fixed reloc	0.658
2020	4	23	2	35	46.55	38.0374	22.9603	6.56	-0.2	2	2020-04-23-02-35-46	2020-04-13-13-58-38	2	1	95	104	128	144	158	Detection fixed reloc	0.685
2020	4	23	2	58	1.877	38.0175	22.9372	11.51	0.2	2	2020-04-23-02-58-01	2020-08-15-01-51-15	17	1	26	28	30	35	39	Detection fixed reloc	0.619
2020	4	23	3	3	6.411	38.024	23.001	3.76	0.2	2	2020-04-23-03-03-06	2020-04-24-18-58-43	2	1	113	125	138	157	175	Detection fixed reloc	0.663
2020	4	23	4	17	19.111	38.024	23.001	3.76	-0.3	2	2020-04-23-04-17-19	2020-04-24-18-58-43	2	1	113	125	138	157	175	Detection fixed reloc	0.921
2020	4	23	6	14	58.86	38.0391	22.9988	3.96	3	1	2020-04-23-06-14-59	2020-04-23-06-14-59	87	1	117	130	144	163	200	Template reloc	1
2020	4	23	6	19	28.91	38.0365	22.9858	5.97	2.3	1	2020-04-23-06-19-30	2020-04-23-06-19-30	87	1	117	130	144	163	184	Template reloc	1
2020	4	23	6	26	52.83	38.0365	22.9858	5.97	0.6	2	2020-04-23-06-26-52	2020-04-23-06-19-30	87	1	117	130	144	163	184	Detection fixed reloc	0.61
2020	4	23	6	31	15.37	38.0365	22.9858	5.97	-0.1	2	2020-04-23-06-31-15	2020-04-23-06-19-30	87	1	117	130	144	163	184	Detection fixed reloc	0.786
2020	4	23	6	35	1.784	38.0238	22.9947	6.94	0.5	2	2020-04-23-06-35-01	2020-04-25-12-03-08	95	1	122	139	154	175	196	Detection fixed reloc	0.628
2020	4	23	6	37	15.59	38.0374	22.9603	6.56	-0.4	2	2020-04-23-06-37-15	2020-04-13-13-58-38	2	1	95	104	128	144	158	Detection fixed reloc	0.731
2020	4	23	6	46	43.45	38.0365	22.9858	5.97	0	2	2020-04-23-06-46-43	2020-04-23-06-19-30	87	1	117	130	144	163	184	Detection fixed reloc	0.789
2020	4	23	6	51	7.87	38.0365	22.9858	5.97	1	2	2020-04-23-06-51-07	2020-04-23-06-19-30	87	1	117	130	144	163	184	Detection fixed reloc	0.722
2020	4	23	6	53	27.239	38.0179	22.9501	4.52	0.2	2	2020-04-23-06-53-27	2020-04-27-04-53-51	2	1	110	121	134	153	174	Detection fixed reloc	0.685
2020	4	23	7	3	51.365	38.0294	22.9829	6.1	-0.5	2	2020-04-23-07-03-51	2020-04-21-15-58-52	2	1	113	125	138	157	179	Detection fixed reloc	0.753
2020	4	23	7	12	37.751	38.024	23.001	3.76	0	2	2020-04-23-07-12-37	2020-04-24-18-58-43	2	1	113	125	138	157	175	Detection fixed reloc	0.716
2020	4	23	7	31	9.07	38.0365	22.9858	5.97	0.4	2	2020-04-23-07-31-09	2020-04-23-06-19-30	87	1	117	130	144	163	184	Detection fixed reloc	0.639
2020	4	23	7	34	36.081	38.0427	22.9601	6.21	0.3	2	2020-04-23-07-34-36	2020-04-04-01-45-18	2	1	4	98	106	141	155	Detection fixed reloc	0.66
2020	4	23	7	37	25.19	38.0365	22.9858	5.97	0.2	2	2020-04-23-07-37-25	2020-04-23-06-19-30	87	1	117	130	144	163	184	Detection fixed reloc	0.63
2020	4	23	7	54	50.631	38.0209	22.9967	5.33	0.1	2	2020-04-23-07-54-50	2020-04-25-18-45-56	87	1	117	130	155	176	197	Detection fixed reloc	0.839
2020	4	23	8	16	4.024	38.0238	22.9947	6.94	1.4	2	2020-04-23-08-16-04	2020-04-25-12-03-08	95	1	122	139	154	175	196	Detection fixed reloc	0.673
2020	4	23	8	16	39.41	38.0365	22.9858	5.97	0	2	2020-04-23-08-16-39	2020-04-23-06-19-30	87	1	117	130	144	163	184	Detection fixed reloc	0.72
2020	4	23	8	24	53.887	38.0248	22.9667	6.84	-0.2	2	2020-04-23-08-24-53	2020-05-09-05-42-20	2	1	95	104	128	144	170	Detection fixed reloc	0.716
2020	4	23	9	41	30.59	38.0365	22.9858	5.97	0	2	2020-04-23-09-41-30	2020-04-23-06-19-30	87	1	117	130	144	163	184	Detection fixed reloc	0.655
2020	4	23	9	49	48.97	38.0365	22.9858	5.97	0.2	2	2020-04-23-09-49-48	2020-04-23-06-19-30	87	1	117	130	144	163	184	Detection fixed reloc	0.712
2020	4	23	10	5	59.636	38.0525	22.9061	11.36	-0.1	2	2020-04-23-10-05-59	2020-04-28-02-43-29	18	2	27	29	31	36	41	Detection fixed reloc	0.86
2020	4	23	10	17	54.927	38.0248	22.9667	6.84	0.1	2	2020-04-23-10-17-54	2020-05-09-05-42-20	2	1	95	104	128	144	170	Detection fixed reloc	0.822
2020	4	23	10	43	49.904	38.0342	22.964	6.29	-0.2	2	2020-04-23-10-43-49	2020-04-14-04-53-28	2	1	4	4	4	147	161	Detection fixed reloc	0.678
2020	4	23	12	9	38.691	38.0209	22.9967	5.33	0.2	2	2020-04-23-12-09-38	2020-04-25-18-45-56	87	1	117	130	155	176	197	Detection fixed reloc	0.628
2020	4	23	12	16	42.13	38.0365	22.9858	5.97	0.2	2	2020-04-23-12-16-42	2020-04-23-06-19-30	87	1	117	130	144	163	184	Detection fixed reloc	0.698
2020	4	23	12	17	13.804	38.2826	22.7324	4.15	1.1	2	2020-04-23-12-17-13	2020-04-21-23-59-35	93	7	121	137	152	173	194	Detection fixed reloc	0.789
2020	4	23	12	25	33.33	38.0365	22.9858	5.97	1	2	2020-04-23-12-25-33	2020-04-23-06-19-30	87	1	117	130	144	163	184	Detection fixed reloc	0.605
2020	4	23	14	17	20.387	38.0723	22.9323	8.1	0.6	2	2020-04-23-14-17-20	2020-05-24-02-51-46	2	2	52	57	61	67	73	Detection fixed reloc	0.613
2020	4	23	14	21	8.93	38.0374	22.9603	6.56	-0.2	2	2020-04-23-14-21-08	2020-04-13-13-58-38	2	1	95	104	128	144	158	Detection fixed reloc	0.69
2020	4	23	15	0	15.491	38.1299	22.6108	11.59	1.3	2	2020-04-23-15-00-15	2020-04-17-17-17-44	81	9	111	122	135	154	171	Detection fixed reloc	0.777
2020	4	23	15	9	24.57	38.0365	22.9858	5.97	0.2	2	2020-04-23-15-09-24	2020-04-23-06-19-30	87	1	117	130	144	163	184	Detection fixed reloc	0.753
2020	4	23	16	10	6.619	38.0179	22.9501	4.52	-0.8	2	2020-04-23-16-10-06	2020-04-27-04-53-51	2	1	110	121	134	153	174	Detection fixed reloc	0.787
2020	4	23	16	12	48.561	38.0427	22.9601	6.21	0.3	2	2020-04-23-16-12-48	2020-04-04-01-45-18	2	1	4	98	106	141	155	Detection fixed reloc	0.792
2020	4	23	17	54	5.007	38.0529	22.9397	7.55	0.1	2	2020-04-23-17-54-05	2020-06-02-00-19-43	2	2	35	38	42	164	185	Detection fixed reloc	0.623
2020	4	23	18	0	44.849	38.0632	22.9297	7.05	0.3	2	2020-04-23-18-00-44	2020-05-15-15-41-15	2	2	24	26	28	32	36	Detection fixed reloc	0.602
2020	4	23	18	2	16.159	38.0179	22.9501	4.52	-0.8	2	2020-04-23-18-02-16	2020-04-27-04-53-51	2	1	110	121	134	153	174	Detection fixed reloc	0.762
2020	4	23	18	17	4.027	38.0248	22.9667	6.84	-0.3	2	2020-04-23-18-17-04	2020-05-09-05-42-20	2	1	95	104	128	144	170	Detection fixed reloc	0.751
2020	4	23	18	19	56.439	38.0179	22.9501	4.52	1.5	2	2020-04-23-18-19-56	2020-04-27-04-53-51	2	1	110	121	134	153	174	Detection fixed reloc	0.88
2020	4	23	18	45	59.339	38.0179	22.9501	4.52	-0.8	2	2020-04-23-18-45-59	2020-04-27-04-53-51	2	1	110	121	134	153	174	Detection fixed reloc	0.895
2020	4	23	19	24	38.879	38.0179	22.9501	4.52	0.1	2	2020-04-23-19-24-38	2020-04-27-04-53-51	2	1	110	121	134	153	174	Detection fixed reloc	0.67
2020	4	23	19	45	9.85	38.0365	22.9858	5.97	0.5	2	2020-04-23-19-45-09	2020-04-23-06-19-30	87	1	117	130	144	163	184	Detection fixed reloc	0.662
2020	4	23	20	51	15.49	38.0365	22.9858	5.97	0.2	2	2020-04-23-20-51-15	2020-04-23-06-19-30	87	1	117	130	144	163	184	Detection fixed reloc	0.646
2020	4	23	21	3	0.478996	38.0179	22.9501	4.52	-0.6	2	2020-04-23-21-03-00	2020-04-27-04-53-51	2	1	110	121	134	153	174	Detection fixed reloc	0.703
2020	4	23	21	9	51.771	38.0209	22.9967	5.33	0.5	2	2020-04-23-21-09-51	2020-04-25-18-45-56	87	1	117	130	155	176	197	Detection fixed reloc	0.792
2020	4	23	22	6	29.671	38.024	23.001	3.76	-0.2	2	2020-04-23-22-06-29	2020-04-24-18-58-43	2	1	113	125	138	157	175	Detection fixed reloc	0.704
2020	4	23	22	13	5.403	38.0085	22.9701	5.51	-0.3	2	2020-04-23-22-13-05	2020-04-21-03-28-13	2	1	4	4	4	147	161	Detection fixed reloc	0.66
2020	4	23	22	14	55.387	38.0248	22.9667	6.84	-0.2	2	2020-04-23-22-14-55	2020-05-09-05-42-20	2	1	95	104	128	144	170	Detection fixed reloc	0.603
2020	4	23	22	16	20.294	38.0642	22.935	9.09	0.3	2	2020-04-23-22-16-20	2020-05-25-20-12-35	2	2	52	142	158	179	201	Detection fixed reloc	0.618
2020	4	23	22	18	27.947	38.0248	22.9667	6.84	-0.1	2	2020-04-23-22-18-27	2020-05-09-05-42-20	2	1	95	104	128	144	170	Detection fixed reloc	0.693
2020	4	23	23	0	11.864	38.0238	22.9947	6.94	0.4	2	2020-04-23-23-00-11	2020-04-25-12-03-08	95	1	122	139	154	175	196	Detection fixed reloc	0.643
2020	4	23	23	21	29.008	38.1105	22.7008	9.69	0.7	2	2020-04-23-23-21-29	2020-04-30-20-20-17	97	8	125	143	159	180	202	Detection fixed reloc	0.821
2020	4	23	23	41	30.344	38.0238	22.9947	6.94	0.5	2	2020-04-23-23-41-30	2020-04-25-12-03-08	95	1	122	139	154	175	196	Detection fixed reloc	0.611
2020	4	24	0	1	43.77	38.0374	22.9603	6.56	0.1	2	2020-04-24-00-01-43	2020-04-13-13-58-38	2	1	95	104	128	144	158	Detection fixed reloc	0.674
2020	4	24	0	46	54.247	38.0248	22.9667	6.84	-0.5	2	2020-04-24-00-46-54	2020-05-09-05-42-20	2	1	95	104	128	144	170	Detection fixed reloc	0.832
2020	4	24	1	36	14.47	38.0365	22.9858	5.97	0.4	2	2020-04-24-01-36-14	2020-04-23-06-19-30	87	1	117	130	144	163	184	Detection fixed reloc	0.699
2020	4	24	1	46	36.934	38.0456	22.9417	8.07	0.4	2	2020-04-24-01-46-36	2020-05-22-18-58-33	2	1	94	103	111	125	136	Detection fixed reloc	0.663
2020	4	24	2	15	39.811	38.024	23.001	3.76	0.8	2	2020-04-24-02-15-39	2020-04-24-18-58-43	2	1	113	125	138	157	175	Detection fixed reloc	0.748
2020	4	24	3	1	35.059	38.0179	22.9501	4.52	0.6	2	2020-04-24-03-01-35	2020-04-27-04-53-51	2	1	110	121	134	153	174	Detection fixed reloc	0.742
2020	4	24	3	12	17.891	38.0209	22.9967	5.33	0.1	2	2020-04-24-03-12-17	2020-04-25-18-45-56	87	1	117	130	155	176	197	Detection fixed reloc	0.627
2020	4	24	3	15	33.706	38.1753	22.5443	12.16	1.1	1	2020-04-24-03-15-25	2020-04-24-03-15-25	98	10	126	144	160	181	203	Template reloc	1
2020	4	24	3	57	23.551	38.0209	22.9967	5.33	0.4	2	2020-04-24-03-57-23	2020-04-25-18-45-56	87	1	117	130	155	176	197	Detection fixed reloc	0.704
2020	4	24	4	48	53.969	38.0632	22.9297	7.05	-0.2	2	2020-04-24-04-48-53	2020-05-15-15-41-15	2	2	24	26	28	32	36	Detection fixed reloc	0.624
2020	4	24	4	55	45.329	38.0632	22.9297	7.05	-0.4	2	2020-04-24-04-55-45	2020-05-15-15-41-15	2	2	24	26	28	32	36	Detection fixed reloc	0.711
2020	4	24	5	6	40.02	38.0769	22.9218	6.71	0.7	2	2020-04-24-05-06-40	2020-05-19-23-34-33	2	2	52	57	61	67	73	Detection fixed reloc	0.608
2020	4	24	5	29	4.898	38.0127	22.9802	5.38	-0.1	2	2020-04-24-05-29-04	2020-04-21-21-47-45	92	1	70	136	151	172	193	Detection fixed reloc	0.861
2020	4	24	5	36	16.945	38.0294	22.9829	6.1	0.2	2	2020-04-24-05-36-16	2020-04-21-15-58-52	2	1	113	125	138	157	179	Detection fixed reloc	0.73
2020	4	24	5	36	41.15	38.0365	22.9858	5.97	0.1	2	2020-04-24-05-36-41	2020-04-23-06-19-30	87	1	117	130	144	163	184	Detection fixed reloc	0.785
2020	4	24	5	48	49.561	38.0427	22.9601	6.21	0	2	2020-04-24-05-48-49	2020-04-04-01-45-18	2	1	4	98	106	141	155	Detection fixed reloc	0.683
2020	4	24	6	33	14.884	38.0342	22.964	6.29	0.8	2	2020-04-24-06-33-14	2020-04-14-04-53-28	2	1	4	4	4	147	161	Detection fixed reloc	0.615
2020	4	24	7	3	41.251	38.0209	22.9967	5.33	0.3	2	2020-04-24-07-03-41	2020-04-25-18-45-56	87	1	117	130	155	176	197	Detection fixed reloc	0.628
2020	4	24	7	5	46.958	38.0531	22.9366	7.14	0.2	2	2020-04-24-07-05-46	2020-05-12-14-58-08	2	2	94	103	111	125	183	Detection fixed reloc	0.636
2020	4	24	8	11	25.451	38.0209	22.9967	5.33	0.5	2	2020-04-24-08-11-25	2020-04-25-18-45-56	87	1	117	130	155	176	197	Detection fixed reloc	0.778
2020	4	24	8	18	6.357	38.0702	22.8667	12.39	1.1	2	2020-04-24-08-18-06	2020-06-26-06-45-04	5	3	127	145	161	182	204	Detection fixed reloc	0.673
2020	4	24	8	33	7.724	38.2826	22.7324	4.15	0.7	2	2020-04-24-08-33-07	2020-04-21-23-59-35	93	7	121	137	152	173	194	Detection fixed reloc	0.843
2020	4	24	8	44	29.391	38.024	23.001	3.76	-0.4	2	2020-04-24-08-44-29	2020-04-24-18-58-43	2	1	113	125	138	157	175	Detection fixed reloc	0.828
2020	4	24	9	3	5.324	38.0238	22.9947	6.94	0.8	2	2020-04-24-09-03-05	2020-04-25-12-03-08	95	1	122	139	154	175	196	Detection fixed reloc	0.624
2020	4	24	9	6	16.224	38.0342	22.964	6.29	0.4	2	2020-04-24-09-06-16	2020-04-14-04-53-28	2	1	4	4	4	147	161	Detection fixed reloc	0.701
2020	4	24	9	47	16.699	38.0179	22.9501	4.52	-0.2	2	2020-04-24-09-47-16	2020-04-27-04-53-51	2	1	110	121	134	153	174	Detection fixed reloc	0.684
2020	4	24	10	20	42.151	38.0209	22.9967	5.33	-0.1	2	2020-04-24-10-20-42	2020-04-25-18-45-56	87	1	117	130	155	176	197	Detection fixed reloc	0.651
2020	4	24	11	10	56.685	38.0345	22.9682	6.63	0.2	2	2020-04-24-11-10-56	2020-04-05-02-42-13	2	1	4	98	106	120	129	Detection fixed reloc	0.661
2020	4	24	11	20	23.031	38.0209	22.9967	5.33	0.1	2	2020-04-24-11-20-23	2020-04-25-18-45-56	87	1	117	130	155	176	197	Detection fixed reloc	0.673
2020	4	24	11	22	26.411	38.0209	22.9967	5.33	1.2	2	2020-04-24-11-22-26	2020-04-25-18-45-56	87	1	117	130	155	176	197	Detection fixed reloc	0.683
2020	4	24	11	23	20.749	38.0734	22.9095	5.35	-0.3	2	2020-04-24-11-23-20	2020-05-23-02-13-42	2	2	70	75	80	91	98	Detection fixed reloc	0.658
2020	4	24	11	43	8.784	38.1569	22.6187	12.68	1.1	2	2020-04-24-11-43-08	2020-04-27-08-42-18	99	9	128	146	162	183	205	Detection fixed reloc	0.774
[truncated: 22,403 more rows]
