# Supplementary material for: Cluster Analysis of Seismicity in the Eastern Gulf of Corinth Based on a Waveform Template Matching Catalog
Source: Sensors (Basel). 2023 Mar 8;23(6):2923. doi: 10.3390/s23062923 (PMC10056727; doi:10.3390/s23062923)
Supplement: Supplementary file 1 [file sensors-23-02923-s001.zip › E3_CAT3_perachora_templates+detections_relocated.xlsx]

## Sheet: Sheet1
Year	Month	Day	Hour	Min	Sec	Latitude	Longitude	Depth	Magnitude	Type	event-code	template code	near C0.64	spatial ID	far C0.50	Description
2020	1	1	1	34	8.1	38.1799	22.7132	5.43	0.7	2	2020-01-01-01-34-08	2020-01-18-00-45-42	1	6	1	Detection relocated
2020	1	1	3	25	48.15	38.1064	22.745	30.82	0.3	2	2020-01-01-03-25-48	2020-01-25-23-14-33	1	8	2	Detection relocated
2020	1	1	4	3	4.19	38.1063	22.7461	30.77	n/a	2	2020-01-01-04-03-04	2020-01-25-23-14-33	1	8	2	Detection relocated
2020	1	1	12	13	15.11	38.1388	22.6151	8.66	1.1	2	2020-01-01-12-13-15	2020-01-10-07-52-08	2	9	3	Detection relocated
2020	1	1	12	25	8.36	38.1388	22.6154	8.83	0.9	2	2020-01-01-12-25-08	2020-01-10-07-52-08	2	9	3	Detection relocated
2020	1	1	16	15	55.72	38.1384	22.6146	8.65	0.6	2	2020-01-01-16-15-55	2020-01-10-07-52-08	2	9	3	Detection relocated
2020	1	1	19	5	3.1	38.1386	22.6145	8.64	0.5	2	2020-01-01-19-05-03	2020-01-10-07-52-08	2	9	3	Detection relocated
2020	1	1	19	31	21.72	38.0836	22.8154	46.31	0.7	2	2020-01-01-19-31-21	2020-01-19-01-42-58	1	4	4	Detection relocated
2020	1	1	22	36	39.235	38.1732	22.7374	18.07	2	1	2020-01-01-22-36-39	2020-01-01-22-36-39	1	6	4	Template reloc
2020	1	1	22	39	18.48	38.1729	22.7377	18.03	1	2	2020-01-01-22-39-18	2020-01-01-22-36-39	1	6	4	Detection relocated
2020	1	1	22	48	27.46	38.1748	22.7364	18.04	0.7	2	2020-01-01-22-48-27	2020-01-01-22-36-39	1	6	4	Detection relocated
2020	1	1	23	8	25.44	38.168	22.7389	18.52	0.8	2	2020-01-01-23-08-25	2020-01-01-22-36-39	1	6	4	Detection relocated
2020	1	2	11	52	46.47	38.0912	22.8198	8.17	1.5	2	2020-01-02-11-52-46	2021-03-13-04-10-40	3	4	5	Detection relocated
2020	1	3	23	46	46.72	38.0841	22.8375	12.91	1.2	2	2020-01-03-23-46-46	2020-09-07-00-54-21	4	3	6	Detection relocated
2020	1	6	18	8	30.48	38.0111	23.0034	6.65	0.3	2	2020-01-06-18-08-30	2020-01-09-20-40-32	5	1	7	Detection relocated
2020	1	7	5	43	31.75	38.0144	23.005	6.65	1.1	2	2020-01-07-05-43-31	2020-01-09-20-40-32	5	1	7	Detection relocated
2020	1	7	19	27	48.84	38.0389	22.879	9.17	0.7	2	2020-01-07-19-27-48	2020-07-27-21-47-17	6	3	8	Detection relocated
2020	1	8	10	4	33.57	38.0268	22.9334	8.21	n/a	2	2020-01-08-10-04-33	2020-06-23-13-02-23	6	1	9	Detection relocated
2020	1	9	2	26	53.87	38.0225	23.0058	6.65	0	2	2020-01-09-02-26-53	2020-01-09-20-40-32	5	1	7	Detection relocated
2020	1	9	2	29	53.82	38.0083	23.0029	6.67	0.1	2	2020-01-09-02-29-53	2020-01-09-20-40-32	5	1	7	Detection relocated
2020	1	9	12	16	16.75	38.1884	22.7225	11.27	0.7	2	2020-01-09-12-16-16	2020-01-17-15-51-20	1	6	10	Detection relocated
2020	1	9	12	19	58.3	38.1876	22.7205	11.26	0.9	2	2020-01-09-12-19-58	2020-01-17-15-51-20	1	6	10	Detection relocated
2020	1	9	12	24	34.92	38.1879	22.7209	11.32	1	2	2020-01-09-12-24-34	2020-01-17-15-51-20	1	6	10	Detection relocated
2020	1	9	12	44	4.04	38.1876	22.7204	11.25	0.9	2	2020-01-09-12-44-04	2020-01-17-15-51-20	1	6	10	Detection relocated
2020	1	9	13	55	52.12	38.1883	22.7216	11.31	1.1	2	2020-01-09-13-55-52	2020-01-17-15-51-20	1	6	10	Detection relocated
2020	1	9	20	36	56.64	38.0162	23.0021	6.84	0.4	2	2020-01-09-20-36-56	2020-01-09-20-40-32	5	1	7	Detection relocated
2020	1	9	20	40	32.446	38.0134	23.0053	6.71	1.2	1	2020-01-09-20-40-32	2020-01-09-20-40-32	5	1	7	Template reloc
2020	1	9	20	41	10.24	38.0058	23.0016	6.67	-0.2	2	2020-01-09-20-41-10	2020-01-09-20-40-32	5	1	7	Detection relocated
2020	1	9	23	31	15.64	38.0074	23.0004	6.61	-0.1	2	2020-01-09-23-31-15	2020-01-09-20-40-32	5	1	7	Detection relocated
2020	1	9	23	48	47.48	38.0187	23.0052	6.65	-0.1	2	2020-01-09-23-48-47	2020-01-09-20-40-32	5	1	7	Detection relocated
2020	1	10	0	43	30.09	38.0393	22.9365	8.36	n/a	2	2020-01-10-00-43-30	2020-06-23-13-02-23	6	1	9	Detection relocated
2020	1	10	0	44	14.45	38.0243	23.0082	6.76	n/a	2	2020-01-10-00-44-14	2020-01-09-20-40-32	5	1	7	Detection relocated
2020	1	10	1	28	38.74	38.0059	23.01	5.81	0.1	2	2020-01-10-01-28-38	2020-01-09-20-40-32	5	1	7	Detection relocated
2020	1	10	1	34	8.8	38.1876	22.7205	11.23	0.5	2	2020-01-10-01-34-08	2020-01-17-15-51-20	1	6	10	Detection relocated
2020	1	10	1	43	4.33	38.0147	23.0044	6.71	0.5	2	2020-01-10-01-43-04	2020-01-09-20-40-32	5	1	7	Detection relocated
2020	1	10	4	10	0	38.0032	23.0012	6.36	0.7	2	2020-01-10-04-09-59	2020-01-09-20-40-32	5	1	7	Detection relocated
2020	1	10	6	13	38.27	38.1884	22.7218	11.33	n/a	2	2020-01-10-06-13-38	2020-01-17-15-51-20	1	6	10	Detection relocated
2020	1	10	7	52	7.625	38.1384	22.615	8.57	1.6	1	2020-01-10-07-52-08	2020-01-10-07-52-08	2	9	3	Template reloc
2020	1	10	8	16	21.07	38.0216	23.0067	6.59	0.5	2	2020-01-10-08-16-21	2020-01-09-20-40-32	5	1	7	Detection relocated
2020	1	10	8	24	53.39	38.1385	22.6139	8.58	1.1	2	2020-01-10-08-24-53	2020-01-10-07-52-08	2	9	3	Detection relocated
2020	1	10	8	25	22.8	38.0268	23.0067	6.56	n/a	2	2020-01-10-08-25-22	2020-01-09-20-40-32	5	1	7	Detection relocated
2020	1	10	9	2	28.99	38.1382	22.6155	7.72	1.2	2	2020-01-10-09-02-28	2020-01-10-07-52-08	2	9	3	Detection relocated
2020	1	10	9	4	47.53	38.0124	23.0032	6.63	0.2	2	2020-01-10-09-04-47	2020-01-09-20-40-32	5	1	7	Detection relocated
2020	1	10	12	56	56.12	38.1391	22.6146	8.64	0.6	2	2020-01-10-12-56-56	2020-01-10-07-52-08	2	9	3	Detection relocated
2020	1	10	18	33	22.6	38.0156	23.004	6.66	0.5	2	2020-01-10-18-33-22	2020-01-09-20-40-32	5	1	7	Detection relocated
2020	1	10	20	47	3.24	38.0065	23.0051	6.15	0.1	2	2020-01-10-20-47-03	2020-01-09-20-40-32	5	1	7	Detection relocated
2020	1	10	22	4	39.9	38.1874	22.7209	11.04	0.5	2	2020-01-10-22-04-39	2020-01-17-15-51-20	1	6	10	Detection relocated
2020	1	10	23	24	35.24	38.0117	23.0085	6.21	0.2	2	2020-01-10-23-24-35	2020-01-09-20-40-32	5	1	7	Detection relocated
2020	1	11	0	11	39.2	38.2007	22.7357	7.07	1	2	2020-01-11-00-11-39	2020-01-17-19-10-15	1	6	4	Detection relocated
2020	1	11	11	34	7.01	38.0234	23.0022	6.87	0.7	2	2020-01-11-11-34-07	2020-01-09-20-40-32	5	1	7	Detection relocated
2020	1	11	16	30	6.71	38.1931	22.7304	10.96	n/a	2	2020-01-11-16-30-06	2020-01-17-15-51-20	1	6	10	Detection relocated
2020	1	11	20	25	12.442	38.0645	22.8566	7.02	1.5	1	2020-01-11-20-25-13	2020-01-11-20-25-13	7	2	11	Template reloc
2020	1	14	12	11	26.81	38.0462	22.936	8.98	n/a	2	2020-01-14-12-11-26	2020-06-23-13-02-23	6	1	9	Detection relocated
2020	1	16	1	45	49.41	38.0254	22.9295	8.35	n/a	2	2020-01-16-01-45-49	2020-06-23-13-02-23	6	1	9	Detection relocated
2020	1	16	1	49	56.27	38.0425	22.9369	8.44	n/a	2	2020-01-16-01-49-56	2020-06-23-13-02-23	6	1	9	Detection relocated
2020	1	17	0	58	19.26	38.1779	22.7134	6.3	1.2	2	2020-01-17-00-58-19	2020-01-18-00-45-42	1	6	1	Detection relocated
2020	1	17	0	59	21.01	38.1745	22.7071	5.66	0.6	2	2020-01-17-00-59-20	2020-01-26-00-16-27	1	6	1	Detection relocated
2020	1	17	1	0	39.65	38.178	22.7138	6.28	n/a	2	2020-01-17-01-00-39	2020-01-18-00-45-42	1	6	1	Detection relocated
2020	1	17	1	6	5.29	38.185	22.7014	4.37	n/a	2	2020-01-17-01-06-05	2020-01-18-00-45-42	1	6	1	Detection relocated
2020	1	17	1	25	44.81	38.1879	22.7163	6.26	0.7	2	2020-01-17-01-25-44	2020-01-26-00-02-03	1	6	12	Detection relocated
2020	1	17	1	39	27.19	38.1877	22.7163	6.38	0.6	2	2020-01-17-01-39-27	2020-01-26-00-02-03	1	6	12	Detection relocated
2020	1	17	3	7	15.61	38.1877	22.7163	6.19	1.3	2	2020-01-17-03-07-15	2020-01-26-00-02-03	1	6	12	Detection relocated
2020	1	17	3	18	18.69	38.178	22.7138	6.27	1	2	2020-01-17-03-18-18	2020-01-18-00-45-42	1	6	1	Detection relocated
2020	1	17	3	37	12.91	38.1061	22.7461	30.77	0.4	2	2020-01-17-03-37-12	2020-01-25-23-14-33	1	8	2	Detection relocated
2020	1	17	3	45	24.98	38.1058	22.746	30.76	0.7	2	2020-01-17-03-45-24	2020-01-25-23-14-33	1	8	2	Detection relocated
2020	1	17	4	18	35.53	38.1877	22.7158	6.18	0.8	2	2020-01-17-04-18-35	2020-01-26-00-02-03	1	6	12	Detection relocated
2020	1	17	5	30	33.54	38.1797	22.7088	9.37	1.9	1	2020-01-17-05-30-33	2020-01-17-05-30-33	1	6	12	Template reloc
2020	1	17	5	31	14.72	38.18	22.709	9.68	1.7	2	2020-01-17-05-31-14	2020-01-17-05-30-33	1	6	12	Detection relocated
2020	1	17	5	35	13.72	38.1062	22.745	30.82	0.5	2	2020-01-17-05-35-13	2020-01-25-23-14-33	1	8	2	Detection relocated
2020	1	17	5	40	29.5	38.1696	22.7124	5.14	1.2	2	2020-01-17-05-40-29	2020-01-18-00-45-42	1	6	1	Detection relocated
2020	1	17	5	44	41.7	38.1058	22.7455	30.77	0.4	2	2020-01-17-05-44-41	2020-01-25-23-14-33	1	8	2	Detection relocated
2020	1	17	6	14	16.98	38.1186	22.7561	30.99	0.6	2	2020-01-17-06-14-16	2020-01-25-23-14-33	1	8	2	Detection relocated
2020	1	17	7	0	1.57	38.188	22.7167	6.2	0.7	2	2020-01-17-07-00-01	2020-01-26-00-02-03	1	6	12	Detection relocated
2020	1	17	8	40	50.26	38.1788	22.7167	6.63	1	2	2020-01-17-08-40-50	2020-01-18-00-45-42	1	6	1	Detection relocated
2020	1	17	10	27	15.71	38.1882	22.7152	6.17	n/a	2	2020-01-17-10-27-15	2020-01-26-00-02-03	1	6	12	Detection relocated
2020	1	17	13	31	49.43	38.1783	22.7137	6.44	0.8	2	2020-01-17-13-31-49	2020-01-18-00-45-42	1	6	1	Detection relocated
2020	1	17	13	48	21.15	38.178	22.7135	6.29	n/a	2	2020-01-17-13-48-21	2020-01-18-00-45-42	1	6	1	Detection relocated
2020	1	17	14	15	28.72	38.1788	22.7155	6.43	1	2	2020-01-17-14-15-28	2020-01-18-00-45-42	1	6	1	Detection relocated
2020	1	17	14	16	34.201	38.1826	22.7122	5.07	2	1	2020-01-17-14-16-34	2020-01-17-14-16-34	1	6	13	Template reloc
2020	1	17	14	18	39.31	38.1777	22.7143	14.18	0.6	2	2020-01-17-14-18-39	2020-01-26-00-16-27	1	6	1	Detection relocated
2020	1	17	14	19	16.69	38.178	22.7136	6.29	0.9	2	2020-01-17-14-19-16	2020-01-18-00-45-42	1	6	1	Detection relocated
2020	1	17	14	23	41.85	38.1874	22.7204	11.21	1.3	2	2020-01-17-14-23-41	2020-01-17-15-51-20	1	6	10	Detection relocated
2020	1	17	14	28	24.73	38.1871	22.7206	10.03	0.9	2	2020-01-17-14-28-24	2020-01-17-15-51-20	1	6	10	Detection relocated
2020	1	17	14	34	55.39	38.1882	22.7218	11.16	0.9	2	2020-01-17-14-34-55	2020-01-17-15-51-20	1	6	10	Detection relocated
2020	1	17	15	51	19.65	38.1876	22.7203	11.26	2	1	2020-01-17-15-51-20	2020-01-17-15-51-20	1	6	10	Template reloc
2020	1	17	15	52	38.55	38.1928	22.7336	11.7	n/a	2	2020-01-17-15-52-38	2020-01-17-15-51-20	1	6	10	Detection relocated
2020	1	17	15	53	5.1	38.1876	22.7201	11.26	1	2	2020-01-17-15-53-05	2020-01-17-15-51-20	1	6	10	Detection relocated
2020	1	17	15	53	33.24	38.1875	22.7207	11.18	n/a	2	2020-01-17-15-53-33	2020-01-17-15-51-20	1	6	10	Detection relocated
2020	1	17	15	58	22.04	38.1876	22.7213	11.14	n/a	2	2020-01-17-15-58-22	2020-01-17-15-51-20	1	6	10	Detection relocated
2020	1	17	15	59	29.93	38.1874	22.7204	11.18	0.9	2	2020-01-17-15-59-29	2020-01-17-15-51-20	1	6	10	Detection relocated
2020	1	17	16	11	46.9	38.2001	22.742	4.56	1.2	2	2020-01-17-16-11-46	2020-01-17-19-10-15	1	6	4	Detection relocated
2020	1	17	16	15	8.98	38.1748	22.7054	5.03	n/a	2	2020-01-17-16-15-08	2020-01-18-00-45-42	1	6	1	Detection relocated
2020	1	17	16	24	55.92	38.1872	22.7198	11.2	1.1	2	2020-01-17-16-24-55	2020-01-17-15-51-20	1	6	10	Detection relocated
2020	1	17	16	30	7.67	38.2011	22.7354	7.25	1.5	2	2020-01-17-16-30-07	2020-01-17-19-10-15	1	6	4	Detection relocated
2020	1	17	16	30	36.99	38.2012	22.733	7.51	n/a	2	2020-01-17-16-30-37	2020-01-17-19-10-15	1	6	4	Detection relocated
2020	1	17	17	18	19.7	38.1781	22.7139	6.27	1	2	2020-01-17-17-18-19	2020-01-18-00-45-42	1	6	1	Detection relocated
2020	1	17	17	27	8.74	38.1874	22.72	11.22	n/a	2	2020-01-17-17-27-08	2020-01-17-15-51-20	1	6	10	Detection relocated
2020	1	17	17	59	24.64	38.2009	22.7351	7.24	1.2	2	2020-01-17-17-59-24	2020-01-17-19-10-15	1	6	4	Detection relocated
2020	1	17	18	17	14.1	38.1874	22.7209	11.1	1.1	2	2020-01-17-18-17-14	2020-01-17-15-51-20	1	6	10	Detection relocated
2020	1	17	18	31	18.36	38.202	22.7369	6.44	1.2	2	2020-01-17-18-31-18	2020-01-17-19-10-15	1	6	4	Detection relocated
2020	1	17	18	33	36.54	38.1936	22.7357	11.78	n/a	2	2020-01-17-18-33-36	2020-01-17-15-51-20	1	6	10	Detection relocated
2020	1	17	18	55	40.88	38.188	22.7159	6.21	0.7	2	2020-01-17-18-55-40	2020-01-26-00-02-03	1	6	12	Detection relocated
2020	1	17	18	56	32.92	38.1885	22.7162	6.32	n/a	2	2020-01-17-18-56-32	2020-01-26-00-02-03	1	6	12	Detection relocated
2020	1	17	19	8	47.72	38.1886	22.7165	6.43	0.6	2	2020-01-17-19-08-47	2020-01-26-00-02-03	1	6	12	Detection relocated
2020	1	17	19	10	15.002	38.2011	22.7355	7.1	1.7	1	2020-01-17-19-10-15	2020-01-17-19-10-15	1	6	4	Template reloc
2020	1	17	20	16	15.74	38.1882	22.7161	6.29	0.8	2	2020-01-17-20-16-15	2020-01-26-00-02-03	1	6	12	Detection relocated
2020	1	17	20	45	25.96	38.1748	22.7071	5.19	0.9	2	2020-01-17-20-45-25	2020-01-18-00-45-42	1	6	1	Detection relocated
2020	1	17	20	52	6.64	38.2011	22.7353	7.16	0.9	2	2020-01-17-20-52-06	2020-01-17-19-10-15	1	6	4	Detection relocated
2020	1	17	21	10	46.9	38.0814	22.8207	45.49	0.5	2	2020-01-17-21-10-46	2020-01-19-01-42-58	1	4	4	Detection relocated
2020	1	17	21	29	49.86	38.1876	22.7195	11.36	n/a	2	2020-01-17-21-29-49	2020-01-17-15-51-20	1	6	10	Detection relocated
2020	1	17	21	38	38.32	38.1792	22.7085	8.48	0.5	2	2020-01-17-21-38-38	2020-01-17-05-30-33	1	6	12	Detection relocated
2020	1	17	22	12	57.68	38.2018	22.7371	6.39	1.3	2	2020-01-17-22-12-57	2020-01-17-19-10-15	1	6	4	Detection relocated
2020	1	17	22	27	11.62	38.188	22.7158	6.23	0.7	2	2020-01-17-22-27-11	2020-01-26-00-02-03	1	6	12	Detection relocated
2020	1	17	22	54	1.64	38.1873	22.7204	11.11	n/a	2	2020-01-17-22-54-01	2020-01-17-15-51-20	1	6	10	Detection relocated
2020	1	18	0	29	23.75	38.1705	22.7167	4.53	1.1	2	2020-01-18-00-29-23	2020-01-18-00-45-42	1	6	1	Detection relocated
2020	1	18	0	45	43.521	38.1782	22.7135	6.23	1.7	1	2020-01-18-00-45-42	2020-01-18-00-45-42	1	6	1	Template reloc
2020	1	18	0	56	41.68	38.1875	22.7203	11.24	n/a	2	2020-01-18-00-56-41	2020-01-17-15-51-20	1	6	10	Detection relocated
2020	1	18	1	33	37.9	38.1874	22.7205	11.17	n/a	2	2020-01-18-01-33-37	2020-01-17-15-51-20	1	6	10	Detection relocated
2020	1	18	1	37	24.747	38.1858	22.7529	15.98	1.5	1	2020-01-18-01-37-23	2020-01-18-01-37-23	1	6	1	Template reloc
2020	1	18	2	24	36.27	38.1817	22.7235	8.91	1	2	2020-01-18-02-24-35	2020-01-17-15-51-20	1	6	10	Detection relocated
2020	1	18	3	7	12.67	38.1688	22.721	16.93	1	2	2020-01-18-03-07-12	2020-01-25-23-37-39	1	6	2	Detection relocated
2020	1	18	3	15	21.68	38.1779	22.7134	6.3	0.8	2	2020-01-18-03-15-21	2020-01-18-00-45-42	1	6	1	Detection relocated
2020	1	18	3	38	35.24	38.1874	22.7202	11.2	0.8	2	2020-01-18-03-38-35	2020-01-17-15-51-20	1	6	10	Detection relocated
2020	1	18	5	13	9.12	38.1876	22.7205	11.25	1.3	2	2020-01-18-05-13-09	2020-01-17-15-51-20	1	6	10	Detection relocated
2020	1	18	5	13	53.6	38.1875	22.7205	11.06	1	2	2020-01-18-05-13-53	2020-01-17-15-51-20	1	6	10	Detection relocated
2020	1	18	6	39	35.84	38.1744	22.7072	5.43	n/a	2	2020-01-18-06-39-35	2020-01-26-00-16-27	1	6	1	Detection relocated
2020	1	18	7	0	36.14	38.1877	22.7206	11.25	1.1	2	2020-01-18-07-00-36	2020-01-17-15-51-20	1	6	10	Detection relocated
2020	1	18	7	47	42.49	38.1883	22.7217	11.35	0.9	2	2020-01-18-07-47-42	2020-01-17-15-51-20	1	6	10	Detection relocated
2020	1	18	7	48	50.66	38.1875	22.7197	11.34	1.2	2	2020-01-18-07-48-50	2020-01-17-15-51-20	1	6	10	Detection relocated
2020	1	18	9	27	36.61	38.1059	22.7452	30.79	0.6	2	2020-01-18-09-27-36	2020-01-25-23-14-33	1	8	2	Detection relocated
2020	1	18	10	30	51.62	38.2011	22.7412	5.94	n/a	2	2020-01-18-10-30-51	2020-01-17-19-10-15	1	6	4	Detection relocated
2020	1	18	11	5	7.21	38.1813	22.7211	10.37	1.2	2	2020-01-18-11-05-06	2020-01-24-09-06-05	1	6	10	Detection relocated
2020	1	18	11	24	7.35	38.1877	22.7217	11.04	1	2	2020-01-18-11-24-07	2020-01-17-15-51-20	1	6	10	Detection relocated
2020	1	18	11	25	18.31	38.1766	22.7157	5.94	n/a	2	2020-01-18-11-25-18	2020-01-18-00-45-42	1	6	1	Detection relocated
2020	1	18	13	44	58.42	38.2006	22.7356	7.76	1.4	2	2020-01-18-13-44-58	2020-01-17-19-10-15	1	6	4	Detection relocated
2020	1	18	14	56	36.21	38.1528	22.7082	15.27	1.1	2	2020-01-18-14-56-36	2020-01-26-05-05-47	1	6	12	Detection relocated
2020	1	18	16	20	1.91	38.1089	22.7375	31.26	n/a	2	2020-01-18-16-20-01	2020-01-25-23-14-33	1	8	2	Detection relocated
2020	1	18	17	46	58.84	38.1895	22.716	6.53	0.7	2	2020-01-18-17-46-58	2020-01-26-00-02-03	1	6	12	Detection relocated
2020	1	18	17	50	52.52	38.1783	22.714	6.18	1.2	2	2020-01-18-17-50-52	2020-01-18-00-45-42	1	6	1	Detection relocated
2020	1	18	17	52	16.58	38.1879	22.7164	6.27	0.7	2	2020-01-18-17-52-16	2020-01-26-00-02-03	1	6	12	Detection relocated
2020	1	18	18	8	35.56	38.1782	22.7138	6.23	n/a	2	2020-01-18-18-08-35	2020-01-18-00-45-42	1	6	1	Detection relocated
2020	1	18	18	32	56.78	38.1882	22.7168	12.78	n/a	2	2020-01-18-18-32-56	2020-01-24-09-06-05	1	6	10	Detection relocated
2020	1	18	19	10	14.56	38.188	22.7157	6.18	n/a	2	2020-01-18-19-10-14	2020-01-26-00-02-03	1	6	12	Detection relocated
2020	1	18	21	4	19.04	38.1843	22.7213	10.68	1.4	2	2020-01-18-21-04-18	2020-01-24-09-06-05	1	6	10	Detection relocated
2020	1	18	21	10	15.98	38.0728	22.865	6.56	0.1	2	2020-01-18-21-10-15	2020-01-18-21-11-07	8	2	14	Detection relocated
2020	1	18	21	11	6.307	38.063	22.8587	7.06	1.5	1	2020-01-18-21-11-07	2020-01-18-21-11-07	8	2	14	Template reloc
2020	1	18	21	36	2.68	38.1777	22.7165	6.83	0.8	2	2020-01-18-21-36-02	2020-01-18-00-45-42	1	6	1	Detection relocated
2020	1	18	23	5	29.64	38.1084	22.7369	31.25	n/a	2	2020-01-18-23-05-29	2020-01-25-23-14-33	1	8	2	Detection relocated
2020	1	19	1	19	10.83	38.1873	22.7158	6.12	0.7	2	2020-01-19-01-19-10	2020-01-26-00-02-03	1	6	12	Detection relocated
2020	1	19	1	42	55.754	38.0845	22.8171	46.31	1.2	1	2020-01-19-01-42-58	2020-01-19-01-42-58	1	4	4	Template loc
2020	1	19	2	23	43.22	38.2001	22.7199	11.27	0.6	2	2020-01-19-02-23-43	2020-01-26-00-02-03	1	6	12	Detection relocated
2020	1	19	12	53	58.67	38.0444	22.9315	8.65	n/a	2	2020-01-19-12-53-58	2020-06-22-17-53-29	6	1	15	Detection relocated
2020	1	20	6	12	51.669	38.1743	22.6421	13	1.9	1	2020-01-20-06-12-52	2020-01-20-06-12-52	9	9	16	Template reloc
2020	1	20	9	3	19.32	38.1787	22.7195	9.51	n/a	2	2020-01-20-09-03-19	2020-01-18-00-45-42	1	6	1	Detection relocated
2020	1	20	12	27	9.51	38.1755	22.7216	4.85	1	2	2020-01-20-12-27-09	2020-01-18-00-45-42	1	6	1	Detection relocated
2020	1	20	17	20	55.68	38.1889	22.7172	6.78	n/a	2	2020-01-20-17-20-55	2020-01-26-00-16-27	1	6	1	Detection relocated
2020	1	20	17	52	37.4	38.19	22.7219	5.64	n/a	2	2020-01-20-17-52-37	2020-01-26-00-02-03	1	6	12	Detection relocated
2020	1	20	18	29	12.44	38.1827	22.7115	9.19	1	2	2020-01-20-18-29-12	2020-01-26-00-16-27	1	6	1	Detection relocated
2020	1	20	21	11	32.6	38.1782	22.7131	6.23	0.8	2	2020-01-20-21-11-32	2020-01-18-00-45-42	1	6	1	Detection relocated
2020	1	20	21	52	1.56	38.1878	22.7206	11.32	n/a	2	2020-01-20-21-52-01	2020-01-17-15-51-20	1	6	10	Detection relocated
2020	1	21	15	55	21.02	38.0482	22.8915	12.35	1.1	2	2020-01-21-15-55-21	2020-07-20-00-21-07	6	3	8	Detection relocated
2020	1	21	18	15	30.94	38.1771	22.7149	5.92	n/a	2	2020-01-21-18-15-30	2020-01-18-00-45-42	1	6	1	Detection relocated
2020	1	21	19	41	51.24	38.1898	22.7234	11.67	0.7	2	2020-01-21-19-41-51	2020-01-17-15-51-20	1	6	10	Detection relocated
2020	1	21	21	44	43.44	38.0563	22.8876	12.72	n/a	2	2020-01-21-21-44-43	2020-07-20-00-21-07	6	3	8	Detection relocated
2020	1	21	23	22	0.5	38.1874	22.7202	11.21	n/a	2	2020-01-21-23-22-00	2020-01-17-15-51-20	1	6	10	Detection relocated
2020	1	22	0	0	19.13	38.1051	22.7447	30.76	0.6	2	2020-01-22-00-00-19	2020-01-25-23-14-33	1	8	2	Detection relocated
2020	1	22	1	4	15.44	38.1817	22.7063	5.36	0.9	2	2020-01-22-01-04-15	2020-01-18-00-45-42	1	6	1	Detection relocated
2020	1	22	1	4	26.68	38.1084	22.7369	31.25	0.5	2	2020-01-22-01-04-26	2020-01-25-23-14-33	1	8	2	Detection relocated
2020	1	22	3	14	16.07	38.1732	22.7255	12.44	0.5	2	2020-01-22-03-14-15	2020-01-22-16-33-56	1	6	17	Detection relocated
2020	1	22	3	46	42.83	38.1481	22.9689	6.43	n/a	2	2020-01-22-03-46-42	2020-03-07-08-20-11	6	2	18	Detection relocated
2020	1	22	13	12	3.45	38.1799	22.7296	13.07	1.1	2	2020-01-22-13-12-03	2020-01-22-16-33-56	1	6	17	Detection relocated
2020	1	22	13	34	3.83	38.1784	22.729	12.83	0.6	2	2020-01-22-13-34-03	2020-01-22-16-33-56	1	6	17	Detection relocated
2020	1	22	16	33	55.922	38.1803	22.7285	13.3	1.8	1	2020-01-22-16-33-56	2020-01-22-16-33-56	1	6	17	Template reloc
2020	1	22	16	35	14.26	38.1756	22.7267	12.85	n/a	2	2020-01-22-16-35-14	2020-01-22-16-33-56	1	6	17	Detection relocated
2020	1	22	16	37	15.21	38.1764	22.7264	12.86	n/a	2	2020-01-22-16-37-15	2020-01-22-16-33-56	1	6	17	Detection relocated
2020	1	22	20	43	40.2	38.203	22.7152	7.31	n/a	2	2020-01-22-20-43-40	2020-01-18-00-45-42	1	6	1	Detection relocated
2020	1	22	22	12	42.06	38.2049	22.7323	5.28	0.7	2	2020-01-22-22-12-41	2020-01-24-18-46-14	10	6	19	Detection relocated
2020	1	23	1	8	4.08	38.2013	22.7408	5.7	1.1	2	2020-01-23-01-08-04	2020-01-17-19-10-15	1	6	4	Detection relocated
2020	1	23	18	35	38.2	38.1898	22.7296	10.29	1	2	2020-01-23-18-35-38	2020-01-17-15-51-20	1	6	10	Detection relocated
2020	1	23	22	32	14.04	38.1058	22.7455	30.77	0.4	2	2020-01-23-22-32-14	2020-01-25-23-14-33	1	8	2	Detection relocated
2020	1	24	0	13	34.43	38.1779	22.7123	8.2	0.9	2	2020-01-24-00-13-34	2020-01-24-09-06-05	1	6	10	Detection relocated
2020	1	24	1	20	11.57	38.183	22.7102	8.79	0.4	2	2020-01-24-01-20-11	2020-01-26-00-16-27	1	6	1	Detection relocated
2020	1	24	9	6	7.271	38.1869	22.7195	12.36	1.7	1	2020-01-24-09-06-05	2020-01-24-09-06-05	1	6	10	Template reloc
2020	1	24	10	57	5.4	38.1859	22.7185	12.25	1.4	2	2020-01-24-10-57-05	2020-01-24-09-06-05	1	6	10	Detection relocated
2020	1	24	14	24	9.81	38.18	22.7077	6.82	n/a	2	2020-01-24-14-24-09	2020-01-26-00-16-27	1	6	1	Detection relocated
2020	1	24	18	46	16.278	38.2007	22.7449	5.79	1.5	1	2020-01-24-18-46-14	2020-01-24-18-46-14	10	6	19	Template reloc
2020	1	24	20	26	41.04	38.1881	22.7228	12.41	0.8	2	2020-01-24-20-26-41	2020-01-24-09-06-05	1	6	10	Detection relocated
2020	1	25	2	55	12.44	38.1882	22.7155	6.4	0.6	2	2020-01-25-02-55-12	2020-01-26-00-02-03	1	6	12	Detection relocated
2020	1	25	14	55	59.19	38.178	22.7147	6.37	0.8	2	2020-01-25-14-55-59	2020-01-18-00-45-42	1	6	1	Detection relocated
2020	1	25	17	18	49.105	38.2609	22.7628	6.49	1.7	1	2020-01-25-17-18-49	2020-01-25-17-18-49	11	7	20	Template reloc
2020	1	25	22	25	24.1	38.1055	22.7454	30.77	n/a	2	2020-01-25-22-25-24	2020-01-25-23-14-33	1	8	2	Detection relocated
2020	1	25	22	25	35.78	38.1674	22.7177	16.94	n/a	2	2020-01-25-22-25-35	2020-01-25-23-37-39	1	6	2	Detection relocated
2020	1	25	22	29	59.68	38.1064	22.7455	30.81	0.3	2	2020-01-25-22-29-59	2020-01-25-23-14-33	1	8	2	Detection relocated
2020	1	25	22	33	9.28	38.106	22.7449	30.8	0.3	2	2020-01-25-22-33-09	2020-01-25-23-14-33	1	8	2	Detection relocated
2020	1	25	23	14	32.947	38.1064	22.7453	30.81	1.1	1	2020-01-25-23-14-33	2020-01-25-23-14-33	1	8	2	Template reloc
2020	1	25	23	37	38.088	38.1689	22.7221	16.91	2.2	1	2020-01-25-23-37-39	2020-01-25-23-37-39	1	6	2	Template reloc
2020	1	25	23	39	53.3	38.1052	22.7454	30.75	0.3	2	2020-01-25-23-39-53	2020-01-25-23-14-33	1	8	2	Detection relocated
2020	1	25	23	40	6.68	38.1706	22.7123	5.27	n/a	2	2020-01-25-23-40-06	2020-01-18-00-45-42	1	6	1	Detection relocated
2020	1	25	23	42	43.36	38.1053	22.7454	30.75	0.3	2	2020-01-25-23-42-43	2020-01-25-23-14-33	1	8	2	Detection relocated
2020	1	25	23	44	4.12	38.1062	22.745	30.82	n/a	2	2020-01-25-23-44-04	2020-01-25-23-14-33	1	8	2	Detection relocated
2020	1	25	23	52	27.5	38.1929	22.7201	4.81	n/a	2	2020-01-25-23-52-27	2020-01-26-00-02-03	1	6	12	Detection relocated
2020	1	26	0	2	3.768	38.1882	22.716	6.17	1.7	1	2020-01-26-00-02-03	2020-01-26-00-02-03	1	6	12	Template reloc
2020	1	26	0	3	17.93	38.1806	22.7144	5.13	n/a	2	2020-01-26-00-03-17	2020-01-26-00-02-03	1	6	12	Detection relocated
2020	1	26	0	4	40.74	38.178	22.7139	6.33	0.7	2	2020-01-26-00-04-40	2020-01-18-00-45-42	1	6	1	Detection relocated
2020	1	26	0	6	7.67	38.1797	22.7084	9.38	1.2	2	2020-01-26-00-06-07	2020-01-17-05-30-33	1	6	12	Detection relocated
2020	1	26	0	16	3.09	38.1815	22.7121	5.14	0.6	2	2020-01-26-00-16-02	2020-01-26-00-02-03	1	6	12	Detection relocated
2020	1	26	0	16	27.591	38.1816	22.7122	8.2	1.4	1	2020-01-26-00-16-27	2020-01-26-00-16-27	1	6	1	Template reloc
2020	1	26	0	17	29.53	38.1752	22.7162	5.53	n/a	2	2020-01-26-00-17-29	2020-01-18-00-45-42	1	6	1	Detection relocated
2020	1	26	0	20	57.77	38.1782	22.7139	6.25	0.9	2	2020-01-26-00-20-57	2020-01-18-00-45-42	1	6	1	Detection relocated
2020	1	26	0	45	7.96	38.1882	22.7156	6.18	0.7	2	2020-01-26-00-45-07	2020-01-26-00-02-03	1	6	12	Detection relocated
2020	1	26	0	46	14.68	38.1888	22.7175	6.14	0.8	2	2020-01-26-00-46-14	2020-01-26-00-02-03	1	6	12	Detection relocated
2020	1	26	0	48	11.19	38.1872	22.7162	6.12	1.1	2	2020-01-26-00-48-11	2020-01-26-00-02-03	1	6	12	Detection relocated
2020	1	26	0	51	14.94	38.188	22.7157	6.31	0.6	2	2020-01-26-00-51-14	2020-01-26-00-02-03	1	6	12	Detection relocated
2020	1	26	0	51	33.54	38.091	22.7393	30.99	n/a	2	2020-01-26-00-51-33	2020-01-25-23-14-33	1	8	2	Detection relocated
2020	1	26	0	53	4.29	38.1877	22.7159	6.24	0.8	2	2020-01-26-00-53-04	2020-01-26-00-02-03	1	6	12	Detection relocated
2020	1	26	1	4	26.35	38.1816	22.7084	8.81	1	2	2020-01-26-01-04-26	2020-01-17-05-30-33	1	6	12	Detection relocated
2020	1	26	1	19	28.01	38.1878	22.7166	6.06	0.7	2	2020-01-26-01-19-28	2020-01-26-00-02-03	1	6	12	Detection relocated
2020	1	26	1	31	55.74	38.1058	22.7455	30.77	n/a	2	2020-01-26-01-31-55	2020-01-25-23-14-33	1	8	2	Detection relocated
2020	1	26	1	47	38.67	38.1687	22.7209	16.94	0.9	2	2020-01-26-01-47-38	2020-01-25-23-37-39	1	6	2	Detection relocated
2020	1	26	1	48	5.24	38.1053	22.7388	31.29	n/a	2	2020-01-26-01-48-05	2020-01-25-23-14-33	1	8	2	Detection relocated
2020	1	26	2	19	28.41	38.1717	22.7188	15.98	1.3	2	2020-01-26-02-19-28	2020-01-26-05-05-47	1	6	12	Detection relocated
2020	1	26	3	14	52.78	38.1874	22.7202	11.2	0.7	2	2020-01-26-03-14-52	2020-01-17-15-51-20	1	6	10	Detection relocated
2020	1	26	3	22	2.23	38.1059	22.746	30.76	0	2	2020-01-26-03-22-02	2020-01-25-23-14-33	1	8	2	Detection relocated
2020	1	26	3	26	20.46	38.188	22.7161	6.23	0.6	2	2020-01-26-03-26-20	2020-01-26-00-02-03	1	6	12	Detection relocated
2020	1	26	3	28	43.38	38.1877	22.7211	11.19	n/a	2	2020-01-26-03-28-43	2020-01-17-15-51-20	1	6	10	Detection relocated
2020	1	26	4	1	21.29	38.1052	22.7454	30.75	n/a	2	2020-01-26-04-01-21	2020-01-25-23-14-33	1	8	2	Detection relocated
2020	1	26	4	4	27.62	38.1877	22.721	11.23	n/a	2	2020-01-26-04-04-27	2020-01-17-15-51-20	1	6	10	Detection relocated
2020	1	26	4	33	46.97	38.1728	22.7188	16.07	1.2	2	2020-01-26-04-33-46	2020-01-26-05-05-47	1	6	12	Detection relocated
2020	1	26	5	5	47.644	38.1719	22.7179	16.04	1.7	1	2020-01-26-05-05-47	2020-01-26-05-05-47	1	6	12	Template reloc
2020	1	26	5	46	20.97	38.1055	22.7445	30.79	0.7	2	2020-01-26-05-46-20	2020-01-25-23-14-33	1	8	2	Detection relocated
2020	1	26	5	47	28.6	38.1868	22.7088	8.25	1.4	2	2020-01-26-05-47-28	2020-01-17-05-30-33	1	6	12	Detection relocated
2020	1	26	6	9	18.77	38.1057	22.7449	30.79	0.5	2	2020-01-26-06-09-18	2020-01-25-23-14-33	1	8	2	Detection relocated
2020	1	26	7	0	38.18	38.1709	22.7176	15.99	1.1	2	2020-01-26-07-00-38	2020-01-26-05-05-47	1	6	12	Detection relocated
2020	1	26	7	17	44.54	38.1777	22.7143	14	0.8	2	2020-01-26-07-17-44	2020-01-26-00-16-27	1	6	1	Detection relocated
2020	1	26	7	50	31.78	38.1719	22.7182	16.02	1	2	2020-01-26-07-50-31	2020-01-26-05-05-47	1	6	12	Detection relocated
2020	1	26	9	46	8.98	38.1872	22.7201	11.06	1.4	2	2020-01-26-09-46-08	2020-01-17-15-51-20	1	6	10	Detection relocated
2020	1	26	9	55	2.56	38.1877	22.7209	11.23	n/a	2	2020-01-26-09-55-02	2020-01-17-15-51-20	1	6	10	Detection relocated
2020	1	26	9	55	53.62	38.1954	22.7234	13.75	n/a	2	2020-01-26-09-55-53	2020-01-17-15-51-20	1	6	10	Detection relocated
2020	1	26	10	47	34.5	38.0193	22.9375	7.51	n/a	2	2020-01-26-10-47-34	2020-08-05-05-35-16	6	2	15	Detection relocated
2020	1	26	10	52	11.38	38.1628	22.709	15.71	n/a	2	2020-01-26-10-52-11	2020-01-26-05-05-47	1	6	12	Detection relocated
2020	1	26	23	36	23.9	38.1764	22.7073	11.13	1.5	2	2020-01-26-23-36-23	2020-01-17-05-30-33	1	6	12	Detection relocated
2020	1	27	0	35	44.23	38.2006	22.7345	8.06	0.8	2	2020-01-27-00-35-44	2020-01-17-19-10-15	1	6	4	Detection relocated
2020	1	27	6	18	28.15	38.2004	22.7354	7.46	1.1	2	2020-01-27-06-18-28	2020-01-17-19-10-15	1	6	4	Detection relocated
2020	1	27	6	23	2.23	38.201	22.7352	7.32	1	2	2020-01-27-06-23-02	2020-01-17-19-10-15	1	6	4	Detection relocated
2020	1	27	6	52	41.09	38.1834	22.7165	11.9	1.5	2	2020-01-27-06-52-40	2020-01-17-05-30-33	1	6	12	Detection relocated
2020	1	27	7	0	12.02	38.2011	22.7351	7.22	1.1	2	2020-01-27-07-00-12	2020-01-17-19-10-15	1	6	4	Detection relocated
2020	1	27	7	25	43.48	38.2005	22.7339	7.88	n/a	2	2020-01-27-07-25-43	2020-01-17-19-10-15	1	6	4	Detection relocated
2020	1	27	13	45	5.76	38.2609	22.7618	6.02	0.8	2	2020-01-27-13-45-05	2020-01-25-17-18-49	11	7	20	Detection relocated
2020	1	27	13	58	17.96	38.1655	22.7151	15.78	1.1	2	2020-01-27-13-58-17	2020-01-26-05-05-47	1	6	12	Detection relocated
2020	1	27	17	42	8.52	38.18	22.7097	9.41	1.1	2	2020-01-27-17-42-08	2020-01-17-05-30-33	1	6	12	Detection relocated
2020	1	27	18	28	49.08	38.2538	22.7173	14.58	1.2	2	2020-01-27-18-28-48	2020-02-18-04-30-41	12	7	21	Detection relocated
2020	1	28	6	28	53.89	38.083	22.8275	46.36	n/a	2	2020-01-28-06-28-53	2020-01-19-01-42-58	1	4	4	Detection relocated
2020	1	28	8	40	6.7	38.0683	22.777	15.38	1.2	2	2020-01-28-08-40-06	2020-09-07-06-26-49	13	4	22	Detection relocated
2020	1	28	10	41	16.72	38.0859	22.819	46.3	0.8	2	2020-01-28-10-41-16	2020-01-19-01-42-58	1	4	4	Detection relocated
2020	1	29	7	57	1.57	38.2476	22.7553	5.01	1	2	2020-01-29-07-57-01	2020-01-25-17-18-49	11	7	20	Detection relocated
2020	1	29	8	35	23.06	38.1899	22.7162	6.6	0.7	2	2020-01-29-08-35-23	2020-01-26-00-02-03	1	6	12	Detection relocated
2020	1	29	14	20	23.27	38.1819	22.7089	7.71	0.6	2	2020-01-29-14-20-23	2020-01-26-00-16-27	1	6	1	Detection relocated
2020	1	29	16	43	57.57	38.0406	22.8713	8.43	1.3	2	2020-01-29-16-43-57	2020-08-06-21-33-02	6	3	23	Detection relocated
2020	1	29	17	39	2.2	38.2032	22.7373	6.12	1.2	2	2020-01-29-17-39-02	2020-01-17-19-10-15	1	6	4	Detection relocated
2020	1	30	6	35	12.24	38.2004	22.7459	5.84	1.1	2	2020-01-30-06-35-12	2020-01-24-18-46-14	10	6	19	Detection relocated
2020	1	30	7	42	36.2	38.1796	22.7382	15.77	2.8	1	2020-01-30-07-42-37	2020-01-30-07-42-37	10	6	19	Template reloc
2020	1	30	7	53	34.31	38.1746	22.733	15.43	n/a	2	2020-01-30-07-53-34	2020-01-30-07-42-37	10	6	19	Detection relocated
2020	1	30	8	7	11.27	38.1998	22.7491	5.92	1.4	2	2020-01-30-08-07-11	2020-01-24-18-46-14	10	6	19	Detection relocated
2020	1	30	9	40	56.92	38.0629	22.9363	7.92	1	2	2020-01-30-09-40-56	2020-05-18-06-05-04	6	2	24	Detection relocated
2020	1	30	18	5	27.08	38.0434	22.8688	8.88	0.9	2	2020-01-30-18-05-27	2020-08-06-21-33-02	6	3	23	Detection relocated
2020	1	30	18	45	45.4	38.0623	22.9383	7.68	0.5	2	2020-01-30-18-45-45	2020-05-18-06-05-04	6	2	24	Detection relocated
2020	1	31	0	32	46.98	38.1911	22.7356	13.2	n/a	2	2020-01-31-00-32-46	2020-03-18-07-59-23	14	6	25	Detection relocated
2020	1	31	2	8	48.23	38.1742	22.7208	8.99	0.5	2	2020-01-31-02-08-48	2020-03-16-21-21-17	14	6	25	Detection relocated
2020	1	31	3	0	37.89	38.0226	22.9448	8.69	-0.1	2	2020-01-31-03-00-37	2020-05-13-14-33-11	6	1	26	Detection relocated
2020	1	31	3	34	58.776	38.1759	22.7264	17.05	1.6	1	2020-01-31-03-34-57	2020-01-31-03-34-57	1	6	4	Template reloc
2020	1	31	3	36	57.47	38.1756	22.7299	16.82	0.7	2	2020-01-31-03-36-57	2020-01-31-03-34-57	1	6	4	Detection relocated
2020	1	31	9	23	26.88	38.061	22.9333	7.63	0.4	2	2020-01-31-09-23-26	2020-05-18-06-05-04	6	2	24	Detection relocated
2020	1	31	12	28	34	38.0216	22.9453	8.6	1	2	2020-01-31-12-28-33	2020-05-13-14-33-11	6	1	26	Detection relocated
2020	1	31	19	45	27.26	38.1747	22.7204	9.1	0.2	2	2020-01-31-19-45-27	2020-03-16-21-21-17	14	6	25	Detection relocated
2020	1	31	22	17	26.94	38.1795	22.7175	11.56	0.2	2	2020-01-31-22-17-27	2020-03-16-21-21-17	14	6	25	Detection relocated
2020	2	1	2	30	40.88	38.1862	22.7009	5.05	0.8	2	2020-02-01-02-30-40	2021-01-13-08-45-03	15	6	27	Detection relocated
2020	2	1	12	37	59.23	38.2022	22.7358	5.69	1.2	2	2020-02-01-12-37-59	2020-01-17-19-10-15	1	6	4	Detection relocated
2020	2	1	18	47	38.76	38.1737	22.7201	8.41	0.5	2	2020-02-01-18-47-38	2020-03-16-21-21-17	14	6	25	Detection relocated
2020	2	1	19	42	57.72	38.1889	22.7351	13	0.8	2	2020-02-01-19-42-57	2020-03-18-07-59-23	14	6	25	Detection relocated
2020	2	1	21	58	41.023	38.197	22.5154	14.44	1.6	1	2020-02-01-21-58-41	2020-02-01-21-58-41	16	10	28	Template reloc
2020	2	2	0	52	55.08	38.0495	22.7747	15.07	n/a	2	2020-02-02-00-52-54	2020-09-07-06-26-49	13	4	22	Detection relocated
2020	2	2	8	50	38.37	38.1835	22.7111	5.73	n/a	2	2020-02-02-08-50-38	2020-01-18-00-45-42	1	6	1	Detection relocated
2020	2	2	10	38	43.68	38.0676	22.7747	15.36	1	2	2020-02-02-10-38-43	2020-09-07-06-26-49	13	4	22	Detection relocated
2020	2	2	10	49	28.46	38.0684	22.7773	15.35	1.5	2	2020-02-02-10-49-28	2020-09-07-06-26-49	13	4	22	Detection relocated
2020	2	2	11	7	56.16	38.1468	22.8058	13.53	n/a	2	2020-02-02-11-07-56	2020-02-04-02-49-35	13	4	22	Detection relocated
2020	2	2	13	26	6.89	38.1497	22.8101	13.55	n/a	2	2020-02-02-13-26-06	2020-02-04-02-49-35	13	4	22	Detection relocated
2020	2	2	13	48	23.23	38.0448	22.8704	8.52	n/a	2	2020-02-02-13-48-23	2020-08-06-21-33-02	6	3	23	Detection relocated
2020	2	2	14	43	19.95	38.2537	22.7238	14.23	1	2	2020-02-02-14-43-19	2020-02-18-04-30-41	12	7	21	Detection relocated
2020	2	2	17	17	2.2	38.1779	22.7133	6.24	1	2	2020-02-02-17-17-02	2020-01-18-00-45-42	1	6	1	Detection relocated
2020	2	2	17	41	40.6	38.0929	22.8689	13.38	n/a	2	2020-02-02-17-41-40	2020-06-26-06-45-04	3	3	29	Detection relocated
2020	2	2	22	35	30.08	38.1727	22.617	11.29	0.8	2	2020-02-02-22-35-30	2021-01-08-19-00-40	17	9	30	Detection relocated
2020	2	2	23	30	11.48	38.2556	22.7218	3.01	n/a	2	2020-02-02-23-30-11	2020-02-18-04-32-23	12	7	21	Detection relocated
2020	2	3	3	1	47.548	38.0831	22.7955	7.76	1.1	1	2020-02-03-03-01-47	2020-02-03-03-01-47	18	4	31	Template reloc
2020	2	3	4	18	46.99	38.2513	22.7159	14.59	n/a	2	2020-02-03-04-18-46	2020-02-18-04-30-41	12	7	21	Detection relocated
2020	2	3	4	51	49.4	38.1824	22.7099	8.67	0.4	2	2020-02-03-04-51-49	2020-01-26-00-16-27	1	6	1	Detection relocated
2020	2	3	7	56	54.31	38.1689	22.7129	4.94	1.2	2	2020-02-03-07-56-54	2020-01-18-00-45-42	1	6	1	Detection relocated
2020	2	3	7	57	44.5	38.1793	22.7172	8.44	1	2	2020-02-03-07-57-44	2020-01-18-00-45-42	1	6	1	Detection relocated
2020	2	3	8	6	58.5	38.1775	22.7171	6.45	n/a	2	2020-02-03-08-06-58	2020-01-18-00-45-42	1	6	1	Detection relocated
2020	2	3	9	45	29.69	38.1882	22.7195	12.1	n/a	2	2020-02-03-09-45-29	2020-01-17-15-51-20	1	6	10	Detection relocated
2020	2	3	10	33	28.71	38.2538	22.723	14.29	1.2	2	2020-02-03-10-33-28	2020-02-18-04-30-41	12	7	21	Detection relocated
2020	2	3	12	34	48.73	38.1877	22.7206	11.36	1	2	2020-02-03-12-34-48	2020-01-17-15-51-20	1	6	10	Detection relocated
2020	2	3	13	34	3.43	38.1105	22.8872	9.51	1.5	2	2020-02-03-13-34-03	2020-02-03-16-25-45	19	2	32	Detection relocated
2020	2	3	13	48	55.47	38.1877	22.7198	11.34	n/a	2	2020-02-03-13-48-55	2020-01-17-15-51-20	1	6	10	Detection relocated
2020	2	3	14	16	37.39	38.1107	22.8877	9.52	1	2	2020-02-03-14-16-37	2020-02-03-16-25-45	19	2	32	Detection relocated
2020	2	3	14	38	3.51	38.1108	22.8877	9.52	1.1	2	2020-02-03-14-38-03	2020-02-03-16-25-45	19	2	32	Detection relocated
2020	2	3	14	41	15.77	38.1105	22.8878	9.52	n/a	2	2020-02-03-14-41-15	2020-02-03-16-25-45	19	2	32	Detection relocated
2020	2	3	14	48	8.85	38.1646	22.686	8.26	1.2	2	2020-02-03-14-48-08	2020-02-08-04-06-44	20	8	33	Detection relocated
2020	2	3	15	1	15.57	38.1108	22.887	9.57	0.9	2	2020-02-03-15-01-15	2020-02-03-16-25-45	19	2	32	Detection relocated
2020	2	3	16	25	44.28	38.1108	22.8872	9.56	1.6	1	2020-02-03-16-25-45	2020-02-03-16-25-45	19	2	32	Template reloc
2020	2	3	17	42	45.24	38.1867	22.7215	10.21	1.1	2	2020-02-03-17-42-45	2020-01-17-15-51-20	1	6	10	Detection relocated
2020	2	3	23	6	26.78	38.1107	22.8868	9.57	0.8	2	2020-02-03-23-06-26	2020-02-03-16-25-45	19	2	32	Detection relocated
2020	2	3	23	27	30.06	38.1106	22.8873	9.53	0.5	2	2020-02-03-23-27-30	2020-02-03-16-25-45	19	2	32	Detection relocated
2020	2	4	1	35	40.48	38.1502	22.6788	10.52	0.8	2	2020-02-04-01-35-40	2020-02-08-01-50-55	20	8	33	Detection relocated
2020	2	4	2	49	14.3	38.1259	22.7752	8.2	1.4	2	2020-02-04-02-49-14	2020-09-07-05-46-26	13	4	34	Detection relocated
2020	2	4	2	49	34.899	38.1157	22.7824	13.36	1.8	1	2020-02-04-02-49-35	2020-02-04-02-49-35	13	4	22	Template reloc
2020	2	4	3	2	23.53	38.1454	22.8024	13.5	0.6	2	2020-02-04-03-02-23	2020-02-04-02-49-35	13	4	22	Detection relocated
2020	2	4	12	40	45.87	38.1497	22.8104	13.28	0.9	2	2020-02-04-12-40-45	2020-02-04-02-49-35	13	4	22	Detection relocated
2020	2	4	13	12	5.76	38.1498	22.6779	10.35	1	2	2020-02-04-13-12-05	2020-02-08-01-50-55	20	8	33	Detection relocated
2020	2	4	22	52	35.92	38.0642	22.7747	15.36	1.1	2	2020-02-04-22-52-35	2020-09-07-06-26-49	13	4	22	Detection relocated
2020	2	4	22	59	34.82	38.147	22.8057	13.55	0.8	2	2020-02-04-22-59-34	2020-02-04-02-49-35	13	4	22	Detection relocated
2020	2	5	12	18	46.68	38.1465	22.8052	13.53	0.6	2	2020-02-05-12-18-46	2020-02-04-02-49-35	13	4	22	Detection relocated
2020	2	6	1	23	10.29	38.0685	22.7777	15.36	0.9	2	2020-02-06-01-23-10	2020-09-07-06-26-49	13	4	22	Detection relocated
2020	2	6	2	4	29.1	38.1469	22.806	13.53	1.3	2	2020-02-06-02-04-29	2020-02-04-02-49-35	13	4	22	Detection relocated
2020	2	6	2	5	13.37	38.1466	22.8049	13.54	0.9	2	2020-02-06-02-05-13	2020-02-04-02-49-35	13	4	22	Detection relocated
2020	2	6	9	27	7.37	38.3333	22.8491	21.06	n/a	2	2020-02-06-09-27-07	2021-01-31-22-12-05	21	0	35	Detection relocated
2020	2	7	2	27	47.42	38.1256	22.7745	8.68	1.3	2	2020-02-07-02-27-47	2020-09-07-05-46-26	13	4	34	Detection relocated
2020	2	7	12	22	29.2	38.1673	22.7054	8.66	1.1	2	2020-02-07-12-22-29	2020-01-17-05-30-33	1	6	12	Detection relocated
2020	2	7	12	28	1.6	38.1804	22.7093	9.42	1.6	2	2020-02-07-12-28-01	2020-01-17-05-30-33	1	6	12	Detection relocated
2020	2	7	15	33	56.45	38.1805	22.7097	9.96	1.7	2	2020-02-07-15-33-56	2020-01-17-05-30-33	1	6	12	Detection relocated
2020	2	7	16	44	11.87	38.1799	22.7089	9.47	1.5	2	2020-02-07-16-44-11	2020-01-17-05-30-33	1	6	12	Detection relocated
2020	2	7	18	14	40.28	38.1058	22.7445	30.8	0.7	2	2020-02-07-18-14-40	2020-01-25-23-14-33	1	8	2	Detection relocated
2020	2	8	0	44	42.79	38.1689	22.6863	7.77	n/a	2	2020-02-08-00-44-42	2020-02-08-04-06-44	20	8	33	Detection relocated
2020	2	8	1	50	55.204	38.151	22.6776	10.69	1.9	1	2020-02-08-01-50-55	2020-02-08-01-50-55	20	8	33	Template reloc
2020	2	8	1	52	26.04	38.15	22.6776	10.45	n/a	2	2020-02-08-01-52-26	2020-02-08-01-50-55	20	8	33	Detection relocated
2020	2	8	1	54	49.16	38.1498	22.6777	10.44	1.1	2	2020-02-08-01-54-49	2020-02-08-01-50-55	20	8	33	Detection relocated
2020	2	8	1	58	49.69	38.1657	22.6863	8.2	1.2	2	2020-02-08-01-58-49	2020-02-08-04-06-44	20	8	33	Detection relocated
2020	2	8	2	52	53.93	38.1481	22.6776	10.85	n/a	2	2020-02-08-02-52-53	2020-02-08-01-50-55	20	8	33	Detection relocated
2020	2	8	4	6	44.508	38.1649	22.685	7.48	2	1	2020-02-08-04-06-44	2020-02-08-04-06-44	20	8	33	Template reloc
2020	2	8	5	18	35.88	38.1503	22.6782	10.19	1.4	2	2020-02-08-05-18-35	2020-02-08-01-50-55	20	8	33	Detection relocated
2020	2	8	5	43	30.91	38.1638	22.6863	7.89	1.2	2	2020-02-08-05-43-30	2020-02-08-04-06-44	20	8	33	Detection relocated
2020	2	8	6	24	33.15	38.1651	22.6859	8.43	1.4	2	2020-02-08-06-24-33	2020-02-08-04-06-44	20	8	33	Detection relocated
2020	2	8	8	21	0.0500031	38.1497	22.6782	10.42	1.4	2	2020-02-08-08-21-00	2020-02-08-01-50-55	20	8	33	Detection relocated
2020	2	8	8	22	54.25	38.1583	22.671	12.41	n/a	2	2020-02-08-08-22-54	2020-02-08-01-50-55	20	8	33	Detection relocated
2020	2	8	8	58	49.87	38.1569	22.6654	12.83	1	2	2020-02-08-08-58-50	2020-02-08-01-50-55	20	8	33	Detection relocated
2020	2	8	21	52	5.24	38.0445	22.8687	9.03	1	2	2020-02-08-21-52-05	2020-08-06-21-33-02	6	3	23	Detection relocated
2020	2	8	23	47	4.9	38.0487	22.8718	8.47	0.5	2	2020-02-08-23-47-04	2020-08-06-21-33-02	6	3	23	Detection relocated
2020	2	9	3	51	17.08	38.0672	22.8574	7.16	0.9	2	2020-02-09-03-51-17	2020-01-11-20-25-13	7	2	11	Detection relocated
2020	2	9	12	53	39.44	38.0937	22.8698	4.7	n/a	2	2020-02-09-12-53-39	2020-01-11-20-25-13	7	2	11	Detection relocated
2020	2	9	15	8	40.55	38.0416	22.8827	12.61	0.6	2	2020-02-09-15-08-40	2020-07-29-11-44-45	22	3	36	Detection relocated
2020	2	9	22	54	12.32	38.0416	22.8829	12.59	0	2	2020-02-09-22-54-12	2020-07-29-11-44-45	22	3	36	Detection relocated
2020	2	10	0	40	34.156	38.0593	22.8551	6.75	1.8	1	2020-02-10-00-40-35	2020-02-10-00-40-35	8	2	14	Template reloc
2020	2	10	0	58	9.52	38.0482	22.8597	8.46	0.9	2	2020-02-10-00-58-09	2020-01-18-21-11-07	8	2	14	Detection relocated
2020	2	10	1	46	13.94	38.0419	22.8825	12.61	0.1	2	2020-02-10-01-46-13	2020-07-29-11-44-45	22	3	36	Detection relocated
2020	2	10	22	14	32.68	38.0662	22.8514	5.18	n/a	2	2020-02-10-22-14-32	2020-07-15-09-11-53	22	2	36	Detection relocated
2020	2	11	14	13	26.08	38.1261	22.7743	8.43	1.2	2	2020-02-11-14-13-26	2020-09-07-05-46-26	13	4	34	Detection relocated
2020	2	11	15	59	6.62	38.1366	22.9714	7.37	n/a	2	2020-02-11-15-59-06	2020-03-07-08-20-11	6	2	18	Detection relocated
2020	2	11	18	26	22.48	38.0612	22.8614	6.71	0.5	2	2020-02-11-18-26-22	2020-03-08-08-27-31	23	2	37	Detection relocated
2020	2	12	0	7	21.48	38.0704	22.8778	11.43	0.7	2	2020-02-12-00-07-21	2020-02-21-21-38-17	24	3	37	Detection relocated
2020	2	12	21	6	48.48	38.0791	22.8599	9.03	1.2	2	2020-02-12-21-06-48	2020-02-12-21-32-14	25	3	38	Detection relocated
2020	2	12	21	14	12.94	38.0784	22.859	9.06	0.2	2	2020-02-12-21-14-12	2020-02-12-21-32-14	25	3	38	Detection relocated
2020	2	12	21	30	27.26	38.0782	22.859	9.04	0.7	2	2020-02-12-21-30-27	2020-02-12-21-32-14	25	3	38	Detection relocated
2020	2	12	21	32	14.157	38.0786	22.8589	9.08	1.6	1	2020-02-12-21-32-14	2020-02-12-21-32-14	25	3	38	Template reloc
2020	2	12	21	34	55.84	38.078	22.8587	9.05	1.1	2	2020-02-12-21-34-55	2020-02-12-21-32-14	25	3	38	Detection relocated
2020	2	12	21	35	46.12	38.0781	22.8584	9.1	0.7	2	2020-02-12-21-35-46	2020-02-12-21-32-14	25	3	38	Detection relocated
2020	2	12	21	43	9.28	38.0785	22.8591	9.05	1.2	2	2020-02-12-21-43-09	2020-02-12-21-32-14	25	3	38	Detection relocated
2020	2	12	21	50	53.38	38.078	22.8585	9.07	0.4	2	2020-02-12-21-50-53	2020-02-12-21-32-14	25	3	38	Detection relocated
2020	2	12	21	56	16.04	38.0788	22.8607	8.96	0.9	2	2020-02-12-21-56-16	2020-02-12-21-32-14	25	3	38	Detection relocated
2020	2	12	21	56	50.4	38.078	22.8584	9.07	0.2	2	2020-02-12-21-56-50	2020-02-12-21-32-14	25	3	38	Detection relocated
2020	2	12	22	2	25.96	38.0781	22.8587	9.06	0.8	2	2020-02-12-22-02-25	2020-02-12-21-32-14	25	3	38	Detection relocated
2020	2	12	22	4	47.56	38.0781	22.8587	9.06	0.4	2	2020-02-12-22-04-47	2020-02-12-21-32-14	25	3	38	Detection relocated
2020	2	12	22	11	13.6	38.0672	22.8553	10.29	1.5	1	2020-02-12-22-11-14	2020-02-12-22-11-14	25	3	38	Template reloc
2020	2	12	22	15	25.14	38.0705	22.8567	10.31	0.3	2	2020-02-12-22-15-25	2020-02-12-22-11-14	25	3	38	Detection relocated
2020	2	13	8	52	41.53	38.2199	22.5528	9.98	1.3	2	2020-02-13-08-52-41	2021-02-13-14-37-38	26	10	39	Detection relocated
2020	2	13	15	21	25.95	38.0743	22.8894	11.36	n/a	2	2020-02-13-15-21-25	2020-02-21-21-38-17	24	3	37	Detection relocated
2020	2	13	15	53	14.87	38.0687	22.8764	11.39	0.8	2	2020-02-13-15-53-14	2020-02-21-21-38-17	24	3	37	Detection relocated
2020	2	14	0	11	26.29	38.0722	22.8774	11.52	0.6	2	2020-02-14-00-11-26	2020-02-21-21-38-17	24	3	37	Detection relocated
2020	2	14	7	19	19.48	38.19	22.7218	11.97	1.2	2	2020-02-14-07-19-19	2020-01-17-15-51-20	1	6	10	Detection relocated
2020	2	14	18	24	0	38.1464	22.8054	13.51	1.1	2	2020-02-14-18-23-59	2020-02-04-02-49-35	13	4	22	Detection relocated
2020	2	14	20	10	54.604	38.1973	22.6211	16.31	1.7	1	2020-02-14-20-10-25	2020-02-14-20-10-25	27	9	40	Template reloc
2020	2	15	3	41	11.24	38.0787	22.9247	3.57	n/a	2	2020-02-15-03-41-11	2020-02-24-01-40-56	23	2	41	Detection relocated
2020	2	15	16	59	18.2	38.0636	22.8728	6.94	0.4	2	2020-02-15-16-59-18	2020-02-24-13-55-20	23	2	41	Detection relocated
2020	2	16	0	27	16.43	38.3263	22.8533	18.57	n/a	2	2020-02-16-00-27-16	2021-01-31-22-12-05	21	0	35	Detection relocated
2020	2	16	2	37	34	38.0802	22.9292	6.49	0.1	2	2020-02-16-02-37-34	2020-07-06-15-46-49	6	2	42	Detection relocated
2020	2	16	2	47	12.59	38.0798	22.9272	6.39	1.1	2	2020-02-16-02-47-12	2020-07-06-15-46-49	6	2	42	Detection relocated
2020	2	16	15	39	11.9	38.2548	22.7284	3.07	n/a	2	2020-02-16-15-39-11	2020-02-18-04-32-23	12	7	21	Detection relocated
2020	2	17	6	30	33.237	38.2013	22.6239	15.89	1.9	1	2020-02-17-06-30-32	2020-02-17-06-30-32	28	9	43	Template reloc
2020	2	17	6	57	4.11	38.0383	22.9362	7.95	n/a	2	2020-02-17-06-57-04	2020-08-05-05-35-16	6	2	15	Detection relocated
2020	2	17	16	26	38.11	38.1998	22.6182	16.51	0.6	2	2020-02-17-16-26-38	2020-02-18-02-46-53	28	9	43	Detection relocated
2020	2	17	17	39	49.26	38.0378	22.9364	7.21	n/a	2	2020-02-17-17-39-49	2020-05-21-20-42-14	6	2	42	Detection relocated
2020	2	17	23	44	31.241	38.1645	22.6028	23.5	1.1	1	2020-02-17-23-44-28	2020-02-17-23-44-28	29	10	44	Template reloc
2020	2	18	2	46	53.584	38.1969	22.6188	15.75	1.1	1	2020-02-18-02-46-53	2020-02-18-02-46-53	28	9	43	Template reloc
2020	2	18	2	56	26.31	38.1997	22.6199	16.37	n/a	2	2020-02-18-02-56-26	2020-02-18-02-46-53	28	9	43	Detection relocated
2020	2	18	3	34	6.65	38.2546	22.7248	3.13	n/a	2	2020-02-18-03-34-06	2020-02-18-04-32-23	12	7	21	Detection relocated
2020	2	18	3	43	30.87	38.2545	22.7243	3.15	n/a	2	2020-02-18-03-43-30	2020-02-18-04-32-23	12	7	21	Detection relocated
2020	2	18	3	51	47.96	38.2552	22.7215	3.07	n/a	2	2020-02-18-03-51-47	2020-02-18-04-32-23	12	7	21	Detection relocated
2020	2	18	4	6	2.39	38.2559	22.7147	3.02	n/a	2	2020-02-18-04-06-02	2020-02-18-04-32-23	12	7	21	Detection relocated
2020	2	18	4	30	40.735	38.2541	22.7228	14.39	2	1	2020-02-18-04-30-41	2020-02-18-04-30-41	12	7	21	Template reloc
2020	2	18	4	32	22.763	38.2527	22.7231	3.42	1.7	1	2020-02-18-04-32-23	2020-02-18-04-32-23	12	7	21	Template reloc
2020	2	18	5	34	27.64	38.1918	22.7396	5.72	0.7	2	2020-02-18-05-34-27	2020-02-20-06-08-36	1	6	17	Detection relocated
2020	2	18	7	30	55.31	38.2547	22.7227	3.14	n/a	2	2020-02-18-07-30-55	2020-02-18-04-32-23	12	7	21	Detection relocated
2020	2	18	7	48	38.6	38.0658	22.9153	6.85	0.2	2	2020-02-18-07-48-38	2020-02-24-01-40-56	23	2	41	Detection relocated
2020	2	18	14	16	4.76	38.2557	22.7209	14.92	0.8	2	2020-02-18-14-16-04	2020-02-18-04-30-41	12	7	21	Detection relocated
2020	2	18	19	25	30.18	38.2506	22.7197	16.57	1.3	2	2020-02-18-19-25-30	2020-02-24-12-57-48	12	7	21	Detection relocated
2020	2	18	19	47	32.56	38.2544	22.7239	3.17	n/a	2	2020-02-18-19-47-32	2020-02-18-04-32-23	12	7	21	Detection relocated
2020	2	18	23	4	17.46	38.3216	22.8439	19.93	n/a	2	2020-02-18-23-04-17	2021-01-31-22-12-05	21	0	35	Detection relocated
2020	2	19	8	52	59.494	38.1819	22.4372	5.21	1.8	1	2020-02-19-08-52-59	2020-02-19-08-52-59	30	0	45	Template loc
2020	2	19	15	58	8.74	38.1918	22.7393	5.73	0.6	2	2020-02-19-15-58-08	2020-02-20-06-08-36	1	6	17	Detection relocated
2020	2	19	20	49	58.96	38.0703	22.8783	11.44	1.2	2	2020-02-19-20-49-58	2020-02-21-21-38-17	24	3	37	Detection relocated
2020	2	19	20	53	31.62	38.0705	22.8788	11.39	0.4	2	2020-02-19-20-53-31	2020-02-21-21-38-17	24	3	37	Detection relocated
2020	2	19	23	39	34.74	38.1918	22.7396	5.72	0.5	2	2020-02-19-23-39-34	2020-02-20-06-08-36	1	6	17	Detection relocated
2020	2	20	4	0	14.42	38.1978	22.705	5.28	n/a	2	2020-02-20-04-00-14	2020-02-20-06-08-36	1	6	17	Detection relocated
2020	2	20	6	8	36.128	38.1919	22.7393	5.71	1.3	1	2020-02-20-06-08-36	2020-02-20-06-08-36	1	6	17	Template reloc
2020	2	20	6	9	14.34	38.1924	22.7407	5.63	n/a	2	2020-02-20-06-09-14	2020-02-20-06-08-36	1	6	17	Detection relocated
2020	2	20	6	10	4.36	38.1918	22.7393	5.73	0.8	2	2020-02-20-06-10-04	2020-02-20-06-08-36	1	6	17	Detection relocated
2020	2	20	6	17	6.53	38.192	22.7394	5.66	0.7	2	2020-02-20-06-17-06	2020-02-20-06-08-36	1	6	17	Detection relocated
2020	2	20	11	41	21.76	38.0568	22.8686	6.09	0.6	2	2020-02-20-11-41-21	2020-02-24-13-55-20	23	2	41	Detection relocated
2020	2	20	13	45	30.97	38.0684	22.875	6.08	n/a	2	2020-02-20-13-45-30	2020-02-24-13-55-20	23	2	41	Detection relocated
2020	2	21	0	7	5.78	38.1741	22.7326	12.31	1	2	2020-02-21-00-07-05	2020-02-21-21-03-09	31	6	46	Detection relocated
2020	2	21	0	50	19.54	38.0818	22.8841	11.77	0.2	2	2020-02-21-00-50-19	2020-02-21-21-38-17	24	3	37	Detection relocated
2020	2	21	1	26	47.87	38.0707	22.8782	11.43	0.5	2	2020-02-21-01-26-47	2020-02-21-21-38-17	24	3	37	Detection relocated
2020	2	21	5	44	35.021	38.2629	22.7272	5.74	2.2	1	2020-02-21-05-44-36	2020-02-21-05-44-36	12	7	21	Template reloc
2020	2	21	10	23	53.88	38.0713	22.9455	7.16	n/a	2	2020-02-21-10-23-53	2020-05-11-14-30-34	6	2	42	Detection relocated
2020	2	21	12	23	42.99	38.076	22.8805	11.46	0.7	2	2020-02-21-12-23-43	2020-02-21-21-38-17	24	3	37	Detection relocated
2020	2	21	18	6	40.4	38.0529	22.9339	7.5	n/a	2	2020-02-21-18-06-40	2020-05-21-20-42-14	6	2	42	Detection relocated
2020	2	21	18	50	7.92	38.0706	22.8865	11.41	0.6	2	2020-02-21-18-50-07	2020-02-21-21-38-17	24	3	37	Detection relocated
2020	2	21	21	3	9.107	38.1738	22.733	12.21	1.6	1	2020-02-21-21-03-09	2020-02-21-21-03-09	31	6	46	Template reloc
2020	2	21	21	13	49.72	38.1742	22.7326	12.35	0.9	2	2020-02-21-21-13-49	2020-02-21-21-03-09	31	6	46	Detection relocated
2020	2	21	21	27	54.84	38.052	22.8711	12.24	1.3	2	2020-02-21-21-27-54	2020-02-26-10-09-35	23	3	41	Detection relocated
2020	2	21	21	32	24.04	38.2543	22.7234	14.44	1.1	2	2020-02-21-21-32-24	2020-02-18-04-30-41	12	7	21	Detection relocated
2020	2	21	21	38	16.054	38.0714	22.8788	11.44	1.8	1	2020-02-21-21-38-17	2020-02-21-21-38-17	24	3	37	Template reloc
2020	2	21	21	45	12.4	38.0709	22.8791	11.34	0.4	2	2020-02-21-21-45-12	2020-02-21-21-38-17	24	3	37	Detection relocated
2020	2	21	23	25	17.28	38.0562	22.8719	7.08	0.6	2	2020-02-21-23-25-17	2020-02-24-13-55-20	23	2	41	Detection relocated
2020	2	22	0	47	26.06	38.0728	22.8778	11.46	0.6	2	2020-02-22-00-47-26	2020-02-21-21-38-17	24	3	37	Detection relocated
2020	2	22	1	14	22.68	38.0511	22.9385	9.04	n/a	2	2020-02-22-01-14-22	2020-07-06-19-54-03	6	1	9	Detection relocated
2020	2	22	1	21	47.9	38.0718	22.8738	11.36	0.5	2	2020-02-22-01-21-47	2020-02-21-21-38-17	24	3	37	Detection relocated
2020	2	22	1	24	27.48	38.079	22.8929	11.49	0.3	2	2020-02-22-01-24-27	2020-02-21-21-38-17	24	3	37	Detection relocated
2020	2	22	2	24	20.23	38.0505	22.8745	8.48	1.1	2	2020-02-22-02-24-20	2020-03-08-08-27-31	23	2	37	Detection relocated
2020	2	22	2	41	59.06	38.0711	22.8877	11.34	0.4	2	2020-02-22-02-41-58	2020-02-21-21-38-17	24	3	37	Detection relocated
2020	2	22	3	14	25.08	38.0716	22.8778	11.59	0.7	2	2020-02-22-03-14-25	2020-02-21-21-38-17	24	3	37	Detection relocated
2020	2	22	3	35	22.33	38.0746	22.9328	8.25	0	2	2020-02-22-03-35-22	2020-05-24-02-51-46	6	2	47	Detection relocated
2020	2	22	4	38	12.99	38.0708	22.8785	11.4	0.6	2	2020-02-22-04-38-13	2020-02-21-21-38-17	24	3	37	Detection relocated
2020	2	22	4	53	27.59	38.0692	22.8776	11.33	0.7	2	2020-02-22-04-53-27	2020-02-21-21-38-17	24	3	37	Detection relocated
2020	2	22	5	36	48.95	38.0566	22.8709	4.9	n/a	2	2020-02-22-05-36-48	2020-02-24-13-55-20	23	2	41	Detection relocated
2020	2	22	7	19	0.910004	38.0787	22.8903	11.47	0.7	2	2020-02-22-07-19-00	2020-02-21-21-38-17	24	3	37	Detection relocated
2020	2	22	7	46	23.79	38.0766	22.8769	11.81	0.3	2	2020-02-22-07-46-23	2020-02-24-10-31-24	32	3	48	Detection relocated
2020	2	22	7	57	48.06	38.1918	22.7392	5.74	0.7	2	2020-02-22-07-57-48	2020-02-20-06-08-36	1	6	17	Detection relocated
2020	2	22	9	32	24.3	38.1914	22.7389	5.84	0.9	2	2020-02-22-09-32-24	2020-02-20-06-08-36	1	6	17	Detection relocated
2020	2	22	9	55	49.59	38.1697	22.7109	5.53	n/a	2	2020-02-22-09-55-49	2020-01-18-00-45-42	1	6	1	Detection relocated
2020	2	22	10	16	4.75	38.0298	22.8264	31.54	1.5	1	2020-02-22-10-16-04	2020-02-22-10-16-04	33	0	49	Template loc
2020	2	22	12	30	16.53	38.0853	22.9227	7.75	1.4	2	2020-02-22-12-30-16	2020-07-06-15-46-49	6	2	42	Detection relocated
2020	2	22	13	28	17.5	38.0683	22.8647	7.01	0.9	2	2020-02-22-13-28-17	2020-03-08-08-27-31	23	2	37	Detection relocated
2020	2	22	15	29	29.96	38.0691	22.8786	11.29	1.2	2	2020-02-22-15-29-29	2020-02-21-21-38-17	24	3	37	Detection relocated
2020	2	22	15	35	19.04	38.0712	22.8778	11.6	1	2	2020-02-22-15-35-19	2020-02-21-21-38-17	24	3	37	Detection relocated
2020	2	22	15	55	9.5	38.1918	22.7388	5.74	1.1	2	2020-02-22-15-55-09	2020-02-20-06-08-36	1	6	17	Detection relocated
2020	2	22	18	5	46.28	38.0655	22.8767	11.62	0.9	2	2020-02-22-18-05-46	2020-02-24-10-31-24	32	3	48	Detection relocated
2020	2	22	18	14	40.44	38.0704	22.8786	11.39	0.9	2	2020-02-22-18-14-40	2020-02-21-21-38-17	24	3	37	Detection relocated
2020	2	22	18	15	38.76	38.0705	22.879	11.39	0.3	2	2020-02-22-18-15-38	2020-02-21-21-38-17	24	3	37	Detection relocated
2020	2	22	20	57	18.48	38.0722	22.9374	7.64	0.3	2	2020-02-22-20-57-18	2020-05-22-22-11-25	6	2	24	Detection relocated
2020	2	22	22	43	14.4	38.0843	22.8753	10.47	0.4	2	2020-02-22-22-43-14	2020-02-21-21-38-17	24	3	37	Detection relocated
2020	2	22	23	37	51.76	38.0637	22.8729	6.94	0.5	2	2020-02-22-23-37-51	2020-02-24-13-55-20	23	2	41	Detection relocated
2020	2	22	23	49	48.66	38.2165	22.6593	11.1	1.1	2	2020-02-22-23-49-48	2020-11-19-15-41-55	34	6	50	Detection relocated
2020	2	23	0	32	22.35	38.063	22.8731	7	1.4	2	2020-02-23-00-32-22	2020-02-24-13-55-20	23	2	41	Detection relocated
2020	2	23	3	2	10.81	38.0686	22.9389	6.3	n/a	2	2020-02-23-03-02-10	2020-07-08-12-31-35	6	2	51	Detection relocated
2020	2	23	5	12	53.87	38.0696	22.9219	7.36	1	2	2020-02-23-05-12-53	2020-02-24-01-40-56	23	2	41	Detection relocated
2020	2	23	6	31	21.66	38.0755	22.8785	11.69	1	2	2020-02-23-06-31-21	2020-02-24-10-31-24	32	3	48	Detection relocated
2020	2	23	10	30	23.4	38.0517	22.9621	7.27	0.2	2	2020-02-23-10-30-23	2020-05-21-20-42-14	6	2	42	Detection relocated
2020	2	23	10	46	34.41	38.0765	22.8776	11.66	0.2	2	2020-02-23-10-46-34	2020-02-24-10-31-24	32	3	48	Detection relocated
2020	2	23	12	9	27.17	38.0141	22.888	10.03	0.5	2	2020-02-23-12-09-27	2020-02-24-18-54-02	23	3	41	Detection relocated
2020	2	23	14	23	46.87	38.0587	22.8769	9.61	n/a	2	2020-02-23-14-23-46	2020-02-26-10-09-35	23	3	41	Detection relocated
2020	2	23	17	43	40.88	38.0055	22.8759	10.64	1	2	2020-02-23-17-43-40	2020-02-24-18-54-02	23	3	41	Detection relocated
2020	2	23	18	1	12.84	38.0749	22.8769	11.72	0.2	2	2020-02-23-18-01-12	2020-02-24-10-31-24	32	3	48	Detection relocated
2020	2	23	18	41	27.84	38.0138	22.6805	6.89	0.7	2	2020-02-23-18-41-27	2020-02-27-20-59-20	35	0	52	Detection relocated
2020	2	24	0	10	44.25	38.0661	22.8727	6.98	0.5	2	2020-02-24-00-10-44	2020-02-24-13-55-20	23	2	41	Detection relocated
2020	2	24	1	40	56.599	38.0704	22.9217	7.47	1.2	1	2020-02-24-01-40-56	2020-02-24-01-40-56	23	2	41	Template reloc
2020	2	24	2	27	8.77	38.0549	22.865	6.31	0.5	2	2020-02-24-02-27-08	2020-02-24-13-55-20	23	2	41	Detection relocated
2020	2	24	2	53	7.56	38.076	22.9204	5.9	n/a	2	2020-02-24-02-53-07	2020-07-06-15-46-49	6	2	42	Detection relocated
2020	2	24	3	20	8.61	38.0757	22.8785	11.72	0.5	2	2020-02-24-03-20-08	2020-02-24-10-31-24	32	3	48	Detection relocated
2020	2	24	4	26	31.87	38.1879	22.7162	6.22	0.7	2	2020-02-24-04-26-31	2020-01-26-00-02-03	1	6	12	Detection relocated
2020	2	24	4	31	40.63	38.1812	22.7241	5.31	n/a	2	2020-02-24-04-31-40	2020-01-18-00-45-42	1	6	1	Detection relocated
2020	2	24	4	38	51.74	38.0759	22.8774	11.76	0.4	2	2020-02-24-04-38-51	2020-02-24-10-31-24	32	3	48	Detection relocated
2020	2	24	4	55	47.44	38.0677	22.8757	11.45	n/a	2	2020-02-24-04-55-47	2020-02-21-21-38-17	24	3	37	Detection relocated
2020	2	24	5	12	55.1	38.0391	22.8825	10.1	0.3	2	2020-02-24-05-12-55	2020-02-24-18-54-02	23	3	41	Detection relocated
2020	2	24	6	39	41.33	38.0369	22.8827	10.06	0.7	2	2020-02-24-06-39-41	2020-02-24-18-54-02	23	3	41	Detection relocated
2020	2	24	6	50	58.06	38.0821	22.862	11.06	0.1	2	2020-02-24-06-50-58	2020-02-24-10-31-24	32	3	48	Detection relocated
2020	2	24	8	51	17.78	38.0687	22.8703	11.57	0.4	2	2020-02-24-08-51-17	2020-02-24-10-31-24	32	3	48	Detection relocated
2020	2	24	9	19	47.06	38.0751	22.8782	11.71	0.3	2	2020-02-24-09-19-47	2020-02-24-10-31-24	32	3	48	Detection relocated
2020	2	24	10	31	7.19	38.1756	22.7502	16.47	n/a	2	2020-02-24-10-31-07	2021-03-07-23-38-11	36	6	53	Detection relocated
2020	2	24	10	31	23.328	38.0762	22.8787	11.74	2	1	2020-02-24-10-31-24	2020-02-24-10-31-24	32	3	48	Template reloc
2020	2	24	11	9	45.61	38.1784	22.7149	6.56	n/a	2	2020-02-24-11-09-45	2020-01-18-00-45-42	1	6	1	Detection relocated
2020	2	24	11	46	50.23	38.0759	22.8789	11.72	0.2	2	2020-02-24-11-46-50	2020-02-24-10-31-24	32	3	48	Detection relocated
2020	2	24	12	18	52.09	38.0741	22.8791	11.78	1.1	2	2020-02-24-12-18-52	2020-02-24-10-31-24	32	3	48	Detection relocated
2020	2	24	12	29	51.71	38.0754	22.8775	11.75	1.3	2	2020-02-24-12-29-51	2020-02-24-10-31-24	32	3	48	Detection relocated
2020	2	24	12	40	22.14	38.0725	22.877	11.83	0.4	2	2020-02-24-12-40-22	2020-02-24-10-31-24	32	3	48	Detection relocated
2020	2	24	12	57	46.953	38.2491	22.7201	16.25	1.7	1	2020-02-24-12-57-48	2020-02-24-12-57-48	12	7	21	Template reloc
2020	2	24	13	24	27.07	38.2634	22.7278	5.89	1.2	2	2020-02-24-13-24-27	2020-02-21-05-44-36	12	7	21	Detection relocated
2020	2	24	13	55	19.179	38.0635	22.8732	6.93	2	1	2020-02-24-13-55-20	2020-02-24-13-55-20	23	2	41	Template reloc
2020	2	24	14	3	19.95	38.0534	22.8683	5.92	0.7	2	2020-02-24-14-03-19	2020-02-24-13-55-20	23	2	41	Detection relocated
2020	2	24	15	41	57.88	38.0722	22.9207	7.6	n/a	2	2020-02-24-15-41-57	2020-02-24-01-40-56	23	2	41	Detection relocated
2020	2	24	16	36	1.62	38.0427	22.884	10.28	0.5	2	2020-02-24-16-36-01	2020-02-24-18-54-02	23	3	41	Detection relocated
2020	2	24	16	51	50.27	38.0627	22.8736	6.72	0.7	2	2020-02-24-16-51-50	2020-02-24-13-55-20	23	2	41	Detection relocated
2020	2	24	18	0	39.88	38.0339	22.8838	10.13	0.4	2	2020-02-24-18-00-39	2020-02-24-18-54-02	23	3	41	Detection relocated
2020	2	24	18	8	40.36	38.0772	22.8788	11.79	0.9	2	2020-02-24-18-08-40	2020-02-24-10-31-24	32	3	48	Detection relocated
2020	2	24	18	30	10.84	38.0614	22.873	6.81	0.4	2	2020-02-24-18-30-10	2020-02-24-13-55-20	23	2	41	Detection relocated
2020	2	24	18	54	30.132	38.0299	22.8833	10.02	1.4	1	2020-02-24-18-54-02	2020-02-24-18-54-02	23	3	41	Template reloc
2020	2	24	18	59	16.16	38.0702	22.9214	7.44	0.1	2	2020-02-24-18-59-16	2020-02-24-01-40-56	23	2	41	Detection relocated
2020	2	24	19	15	26.64	38.0951	22.8702	10.7	0.7	2	2020-02-24-19-15-26	2020-02-24-10-31-24	32	3	48	Detection relocated
2020	2	24	19	48	2.12	38.0917	22.8637	5.77	0.2	2	2020-02-24-19-48-02	2020-03-09-07-53-04	23	3	41	Detection relocated
2020	2	24	19	57	51.04	38.0565	22.871	8.38	0.3	2	2020-02-24-19-57-51	2020-03-09-07-53-04	23	3	41	Detection relocated
2020	2	24	19	58	4.92	38.0614	22.8725	6.87	0.2	2	2020-02-24-19-58-04	2020-02-24-13-55-20	23	2	41	Detection relocated
2020	2	24	20	8	2.46	38.0399	22.8863	10.11	0.6	2	2020-02-24-20-08-02	2020-02-24-18-54-02	23	3	41	Detection relocated
2020	2	24	21	19	37	38.07	22.8774	11.41	0.8	2	2020-02-24-21-19-37	2020-02-21-21-38-17	24	3	37	Detection relocated
2020	2	24	21	21	3.64	38.0756	22.8759	10.28	0.9	2	2020-02-24-21-21-03	2020-02-24-10-31-24	32	3	48	Detection relocated
2020	2	24	22	2	19.34	38.0092	22.8813	9.78	0.4	2	2020-02-24-22-02-19	2020-02-24-18-54-02	23	3	41	Detection relocated
2020	2	24	23	5	39.74	38.0632	22.8733	6.9	0.4	2	2020-02-24-23-05-39	2020-02-24-13-55-20	23	2	41	Detection relocated
2020	2	24	23	25	47.84	38.0608	22.872	6.83	0.6	2	2020-02-24-23-25-47	2020-02-24-13-55-20	23	2	41	Detection relocated
2020	2	24	23	31	43.84	38.0303	22.8841	10.01	0.3	2	2020-02-24-23-31-43	2020-02-24-18-54-02	23	3	41	Detection relocated
2020	2	25	2	57	33.86	38.0665	22.8637	7.12	0.7	2	2020-02-25-02-57-33	2020-03-08-08-27-31	23	2	37	Detection relocated
2020	2	25	4	50	10.11	38.0273	22.8837	9.85	n/a	2	2020-02-25-04-50-10	2020-02-24-18-54-02	23	3	41	Detection relocated
2020	2	25	5	9	10.99	38.0701	22.9223	7.41	1.2	2	2020-02-25-05-09-11	2020-02-24-01-40-56	23	2	41	Detection relocated
2020	2	25	6	25	12.93	38.0573	22.8711	7.16	0.6	2	2020-02-25-06-25-12	2020-02-24-13-55-20	23	2	41	Detection relocated
2020	2	25	6	35	21.65	38.0584	22.87	6.59	0.7	2	2020-02-25-06-35-21	2020-02-24-13-55-20	23	2	41	Detection relocated
2020	2	25	8	30	17.66	38.0718	22.9222	7.49	0.5	2	2020-02-25-08-30-17	2020-02-24-01-40-56	23	2	41	Detection relocated
2020	2	25	8	54	28.57	38.0239	22.8879	9.63	0.4	2	2020-02-25-08-54-28	2020-02-24-18-54-02	23	3	41	Detection relocated
2020	2	25	10	4	14.06	38.0192	22.8872	9.56	0.5	2	2020-02-25-10-04-13	2020-02-24-18-54-02	23	3	41	Detection relocated
2020	2	25	11	36	10.65	38.0362	22.8813	9.91	0.4	2	2020-02-25-11-36-10	2020-02-24-18-54-02	23	3	41	Detection relocated
2020	2	25	12	21	7.15	38.0027	22.8828	9.69	n/a	2	2020-02-25-12-21-07	2020-02-24-18-54-02	23	3	41	Detection relocated
2020	2	25	12	38	6.192	38.0644	22.8703	7.85	1.5	1	2020-02-25-12-38-06	2020-02-25-12-38-06	23	2	41	Template reloc
2020	2	25	13	48	27	38.0321	22.8838	10.08	0.8	2	2020-02-25-13-48-27	2020-02-24-18-54-02	23	3	41	Detection relocated
2020	2	25	13	51	59.99	38.0593	22.8746	7.55	1	2	2020-02-25-13-51-59	2020-02-24-13-55-20	23	2	41	Detection relocated
2020	2	25	14	8	29.31	38.0636	22.8638	8.83	1.1	2	2020-02-25-14-08-29	2020-03-08-08-27-31	23	2	37	Detection relocated
2020	2	25	18	17	21.88	38.0631	22.8719	6.88	0.4	2	2020-02-25-18-17-21	2020-02-24-13-55-20	23	2	41	Detection relocated
2020	2	25	20	6	24	38.03	22.8833	10.01	1.2	2	2020-02-25-20-06-24	2020-02-24-18-54-02	23	3	41	Detection relocated
2020	2	25	21	29	27.14	38.0613	22.915	6.57	0.2	2	2020-02-25-21-29-27	2020-02-24-01-40-56	23	2	41	Detection relocated
2020	2	25	21	35	17.38	38.0635	22.9331	8.39	n/a	2	2020-02-25-21-35-17	2020-07-07-19-23-21	6	2	54	Detection relocated
2020	2	25	23	25	43.407	38.1841	22.6425	13.71	1.7	1	2020-02-25-23-25-44	2020-02-25-23-25-44	9	9	55	Template reloc
2020	2	26	0	40	0.580002	38.0617	22.8725	9.07	0.4	2	2020-02-26-00-40-00	2020-03-09-07-53-04	23	3	41	Detection relocated
2020	2	26	2	2	18.77	38.0261	22.8861	10.31	0.4	2	2020-02-26-02-02-18	2020-02-24-18-54-02	23	3	41	Detection relocated
2020	2	26	3	19	47.68	38.0712	22.8797	11.4	0.7	2	2020-02-26-03-19-47	2020-02-21-21-38-17	24	3	37	Detection relocated
2020	2	26	5	7	47.03	38.073	22.9174	7.61	0.2	2	2020-02-26-05-07-47	2020-02-24-01-40-56	23	2	41	Detection relocated
2020	2	26	5	58	26.88	38.0668	22.866	6.96	0.4	2	2020-02-26-05-58-26	2020-03-08-08-27-31	23	2	37	Detection relocated
2020	2	26	7	26	57.83	38.033	22.8836	10.07	0.8	2	2020-02-26-07-26-57	2020-02-24-18-54-02	23	3	41	Detection relocated
2020	2	26	7	45	5.61	38.0589	22.872	8.51	0.8	2	2020-02-26-07-45-05	2020-03-09-07-53-04	23	3	41	Detection relocated
2020	2	26	8	43	41.6	38.0367	22.9272	7.73	n/a	2	2020-02-26-08-43-41	2020-08-05-05-35-16	6	2	15	Detection relocated
2020	2	26	9	6	30.31	38.0647	22.9386	8.82	n/a	2	2020-02-26-09-06-30	2020-05-19-04-49-31	6	2	56	Detection relocated
2020	2	26	10	9	35.146	38.0553	22.8729	9.65	1.8	1	2020-02-26-10-09-35	2020-02-26-10-09-35	23	3	41	Template reloc
2020	2	26	19	57	4.16	38.0758	22.879	11.68	1	2	2020-02-26-19-57-04	2020-02-24-10-31-24	32	3	48	Detection relocated
2020	2	27	2	1	9.58	38.0239	22.6817	5.81	0.8	2	2020-02-27-02-01-09	2020-02-27-20-59-20	35	0	52	Detection relocated
2020	2	27	2	7	56.31	38.0205	22.686	5.59	1	2	2020-02-27-02-07-56	2020-02-27-20-59-20	35	0	52	Detection relocated
2020	2	27	3	30	29.34	38.013	22.6805	6.82	n/a	2	2020-02-27-03-30-29	2020-02-27-20-59-20	35	0	52	Detection relocated
2020	2	27	5	8	18.5	38.0146	22.6809	6.87	0.6	2	2020-02-27-05-08-18	2020-02-27-20-59-20	35	0	52	Detection relocated
2020	2	27	5	20	46.17	38.0565	22.8676	9.23	0.6	2	2020-02-27-05-20-46	2020-03-09-07-53-04	23	3	41	Detection relocated
2020	2	27	18	55	57.24	38.032	22.883	10.17	1	2	2020-02-27-18-55-57	2020-02-24-18-54-02	23	3	41	Detection relocated
2020	2	27	20	28	43.64	38.1944	22.7372	9.7	n/a	2	2020-02-27-20-28-43	2021-04-21-15-25-19	36	6	57	Detection relocated
2020	2	27	20	59	20.581	38.0146	22.6807	6.83	1.4	1	2020-02-27-20-59-20	2020-02-27-20-59-20	35	0	52	Template loc
2020	2	27	21	1	29.78	38.0143	22.6806	6.83	0.3	2	2020-02-27-21-01-29	2020-02-27-20-59-20	35	0	52	Detection relocated
2020	2	27	21	30	12.44	38.0662	22.8725	8.79	n/a	2	2020-02-27-21-30-12	2020-03-09-07-53-04	23	3	41	Detection relocated
2020	2	27	21	38	17.64	38.0143	22.6805	6.88	0.5	2	2020-02-27-21-38-17	2020-02-27-20-59-20	35	0	52	Detection relocated
2020	2	27	21	38	47.32	38.0147	22.6807	6.91	0.8	2	2020-02-27-21-38-47	2020-02-27-20-59-20	35	0	52	Detection relocated
2020	2	27	21	57	16.88	38.0402	22.8802	10.43	1	2	2020-02-27-21-57-16	2020-02-24-18-54-02	23	3	41	Detection relocated
2020	2	27	22	31	44.16	38.0137	22.6804	6.89	0.6	2	2020-02-27-22-31-44	2020-02-27-20-59-20	35	0	52	Detection relocated
2020	2	27	22	32	53.36	38.008	22.6807	6.74	0.3	2	2020-02-27-22-32-53	2020-02-27-20-59-20	35	0	52	Detection relocated
2020	2	27	23	15	24.1	38.2394	22.593	11.79	1.5	2	2020-02-27-23-15-24	2020-02-28-02-22-03	37	10	58	Detection relocated
2020	2	28	0	51	24.65	38.0056	22.6809	6.69	0.5	2	2020-02-28-00-51-24	2020-02-27-20-59-20	35	0	52	Detection relocated
2020	2	28	2	12	13.975	38.1923	22.6909	16.9	1.6	1	2020-02-28-02-12-14	2020-02-28-02-12-14	38	6	59	Template reloc
2020	2	28	2	18	53.98	38.1922	22.691	16.87	n/a	2	2020-02-28-02-18-53	2020-02-28-02-12-14	38	6	59	Detection relocated
2020	2	28	2	22	4.093	38.2394	22.5925	11.86	1.6	1	2020-02-28-02-22-03	2020-02-28-02-22-03	37	10	58	Template reloc
2020	2	28	2	24	55.48	38.1923	22.6911	16.9	0.2	2	2020-02-28-02-24-55	2020-02-28-02-12-14	38	6	59	Detection relocated
2020	2	28	2	53	8.41	38.195	22.6802	17.96	n/a	2	2020-02-28-02-53-08	2020-02-28-02-12-14	38	6	59	Detection relocated
2020	2	28	3	41	0.779999	38.1922	22.6907	16.89	0.4	2	2020-02-28-03-41-00	2020-02-28-02-12-14	38	6	59	Detection relocated
2020	2	28	4	34	50.92	38.0848	22.885	12.1	0.4	2	2020-02-28-04-34-50	2020-02-24-10-31-24	32	3	48	Detection relocated
2020	2	28	4	36	47.58	38.1946	22.6805	17.86	n/a	2	2020-02-28-04-36-47	2020-02-28-02-12-14	38	6	59	Detection relocated
2020	2	28	5	11	36.04	38.1922	22.6914	16.87	0.6	2	2020-02-28-05-11-36	2020-02-28-02-12-14	38	6	59	Detection relocated
2020	2	28	5	13	38.82	38.1922	22.6911	16.86	0.6	2	2020-02-28-05-13-38	2020-02-28-02-12-14	38	6	59	Detection relocated
2020	2	28	6	34	58.81	38.1922	22.6916	16.87	n/a	2	2020-02-28-06-34-58	2020-02-28-02-12-14	38	6	59	Detection relocated
2020	2	28	8	9	34.4	38.1922	22.691	16.88	0.9	2	2020-02-28-08-09-34	2020-02-28-02-12-14	38	6	59	Detection relocated
2020	2	28	11	2	33.37	38.0714	22.8749	12.38	n/a	2	2020-02-28-11-02-33	2020-02-24-10-31-24	32	3	48	Detection relocated
2020	2	28	16	10	15.56	38.1923	22.6901	16.89	0.9	2	2020-02-28-16-10-15	2020-02-28-02-12-14	38	6	59	Detection relocated
2020	2	28	19	8	53.36	38.1918	22.6916	16.96	0.9	2	2020-02-28-19-08-53	2020-02-28-02-12-14	38	6	59	Detection relocated
2020	2	28	21	14	12.56	38.2395	22.5921	11.98	1.4	2	2020-02-28-21-14-12	2020-02-28-02-22-03	37	10	58	Detection relocated
2020	2	28	21	37	53.64	38.1922	22.6911	16.85	1	2	2020-02-28-21-37-53	2020-02-28-02-12-14	38	6	59	Detection relocated
2020	2	28	22	58	43.04	38.2395	22.5919	11.92	1.5	2	2020-02-28-22-58-43	2020-02-28-02-22-03	37	10	58	Detection relocated
2020	2	28	23	24	50.42	38.2395	22.5937	11.9	1.4	2	2020-02-28-23-24-50	2020-02-28-02-22-03	37	10	58	Detection relocated
2020	2	28	23	28	17.7	38.1797	22.6965	21.06	1.5	2	2020-02-28-23-28-17	2020-03-02-16-19-48	38	6	59	Detection relocated
2020	2	28	23	31	30.18	38.1935	22.69	16.94	0.9	2	2020-02-28-23-31-30	2020-02-28-02-12-14	38	6	59	Detection relocated
2020	2	28	23	33	10.26	38.1917	22.6911	17.05	0.8	2	2020-02-28-23-33-10	2020-02-28-02-12-14	38	6	59	Detection relocated
2020	2	28	23	45	17.16	38.1921	22.6911	16.86	0.8	2	2020-02-28-23-45-17	2020-02-28-02-12-14	38	6	59	Detection relocated
2020	2	29	1	47	8.83	38.1794	22.6963	21.06	1.1	2	2020-02-29-01-47-08	2020-03-02-16-19-48	38	6	59	Detection relocated
2020	2	29	3	31	25.68	38.1924	22.6911	16.89	0.8	2	2020-02-29-03-31-25	2020-02-28-02-12-14	38	6	59	Detection relocated
2020	2	29	11	54	50.72	38.0535	22.8696	5.18	n/a	2	2020-02-29-11-54-50	2020-02-24-13-55-20	23	2	41	Detection relocated
2020	2	29	14	26	37.07	38.0666	22.8639	7.14	1	2	2020-02-29-14-26-37	2020-03-08-08-27-31	23	2	37	Detection relocated
2020	2	29	14	45	18.6	38.0663	22.8785	5.75	0.5	2	2020-02-29-14-45-18	2020-02-24-13-55-20	23	2	41	Detection relocated
2020	2	29	17	39	14.7	38.1868	22.7189	11.18	0.4	2	2020-02-29-17-39-14	2020-01-17-15-51-20	1	6	10	Detection relocated
2020	2	29	20	58	29.56	38.1816	22.6955	20.92	0.7	2	2020-02-29-20-58-29	2020-03-02-16-19-48	38	6	59	Detection relocated
2020	2	29	21	54	58.1	38.1922	22.6911	16.87	0.6	2	2020-02-29-21-54-58	2020-02-28-02-12-14	38	6	59	Detection relocated
2020	2	29	21	56	59.68	38.1924	22.6916	16.86	0.6	2	2020-02-29-21-56-59	2020-02-28-02-12-14	38	6	59	Detection relocated
2020	2	29	22	6	53.66	38.1924	22.6911	16.9	0.5	2	2020-02-29-22-06-53	2020-02-28-02-12-14	38	6	59	Detection relocated
2020	3	1	0	11	14.85	38.1918	22.7393	5.72	0.3	2	2020-03-01-00-11-14	2020-02-20-06-08-36	1	6	17	Detection relocated
2020	3	1	1	25	38.15	38.186	22.7184	10.67	0.4	2	2020-03-01-01-25-38	2020-01-17-15-51-20	1	6	10	Detection relocated
2020	3	1	2	20	53.73	38.1499	22.6724	4.59	-0.1	2	2020-03-01-02-20-53	2020-03-08-00-38-58	39	8	60	Detection relocated
2020	3	1	4	25	58.78	38.1874	22.7202	11.21	0.2	2	2020-03-01-04-25-58	2020-01-17-15-51-20	1	6	10	Detection relocated
2020	3	1	4	32	37.44	38.069	22.8758	13.29	n/a	2	2020-03-01-04-32-37	2020-02-24-10-31-24	32	3	48	Detection relocated
2020	3	1	8	46	21.12	38.1874	22.7201	11.22	0.6	2	2020-03-01-08-46-21	2020-01-17-15-51-20	1	6	10	Detection relocated
2020	3	1	18	11	45.84	38.0742	22.8744	8.79	n/a	2	2020-03-01-18-11-45	2020-03-08-08-27-31	23	2	37	Detection relocated
2020	3	1	18	30	56.52	38.1716	22.6519	14.98	n/a	2	2020-03-01-18-30-56	2020-03-01-19-34-20	40	9	61	Detection relocated
2020	3	1	19	34	20.379	38.17	22.6523	14.44	1.7	1	2020-03-01-19-34-20	2020-03-01-19-34-20	40	9	61	Template reloc
2020	3	1	20	5	9.76	38.076	22.8838	11.64	0.2	2	2020-03-01-20-05-09	2020-02-24-10-31-24	32	3	48	Detection relocated
2020	3	1	22	48	28.84	38.1413	22.6781	11.18	1	2	2020-03-01-22-48-28	2020-03-08-00-41-09	39	8	60	Detection relocated
2020	3	1	23	30	27.1	38.0632	22.8729	6.98	1.2	2	2020-03-01-23-30-27	2020-02-24-13-55-20	23	2	41	Detection relocated
2020	3	2	0	19	34.69	38.1413	22.6762	11.12	0.9	2	2020-03-02-00-19-34	2020-03-08-00-41-09	39	8	60	Detection relocated
2020	3	2	1	50	37.91	38.1973	22.7347	10.25	n/a	2	2020-03-02-01-50-37	2021-03-17-11-25-24	36	6	62	Detection relocated
2020	3	2	2	31	51.84	38.1921	22.6914	16.84	n/a	2	2020-03-02-02-31-51	2020-02-28-02-12-14	38	6	59	Detection relocated
2020	3	2	3	14	4.34	38.1804	22.7598	3.77	n/a	2	2020-03-02-03-14-04	2021-03-17-06-39-32	36	6	53	Detection relocated
2020	3	2	6	2	41.39	38.2395	22.5927	11.88	1.4	2	2020-03-02-06-02-41	2020-02-28-02-22-03	37	10	58	Detection relocated
2020	3	2	6	55	39.79	38.1799	22.6961	21.05	1.4	2	2020-03-02-06-55-39	2020-03-02-16-19-48	38	6	59	Detection relocated
2020	3	2	7	48	10.56	38.1922	22.6908	16.89	1	2	2020-03-02-07-48-10	2020-02-28-02-12-14	38	6	59	Detection relocated
2020	3	2	8	47	0.279999	38.1923	22.6909	16.9	1.1	2	2020-03-02-08-47-00	2020-02-28-02-12-14	38	6	59	Detection relocated
2020	3	2	8	55	58.19	38.132	22.6803	13.03	1.4	2	2020-03-02-08-55-58	2020-03-08-00-41-09	39	8	60	Detection relocated
2020	3	2	10	20	41.33	38.0756	22.8634	6.79	0.8	2	2020-03-02-10-20-41	2020-03-08-08-27-31	23	2	37	Detection relocated
2020	3	2	10	21	10.67	38.1796	22.697	21.09	1.2	2	2020-03-02-10-21-10	2020-03-02-16-19-48	38	6	59	Detection relocated
2020	3	2	12	32	33.51	38.1796	22.6966	21.07	1.1	2	2020-03-02-12-32-33	2020-03-02-16-19-48	38	6	59	Detection relocated
2020	3	2	12	48	7.13	38.1795	22.6968	21.05	0.8	2	2020-03-02-12-48-07	2020-03-02-16-19-48	38	6	59	Detection relocated
2020	3	2	12	57	26.21	38.1798	22.6965	21.09	1.1	2	2020-03-02-12-57-26	2020-03-02-16-19-48	38	6	59	Detection relocated
2020	3	2	12	58	5.21	38.1798	22.6966	21.08	0.7	2	2020-03-02-12-58-05	2020-03-02-16-19-48	38	6	59	Detection relocated
2020	3	2	15	9	34.15	38.1796	22.6966	21.05	n/a	2	2020-03-02-15-09-34	2020-03-02-16-19-48	38	6	59	Detection relocated
2020	3	2	15	23	36.95	38.1793	22.6967	21.12	1.5	2	2020-03-02-15-23-36	2020-03-02-16-19-48	38	6	59	Detection relocated
2020	3	2	16	19	48.582	38.1797	22.6967	21.07	1.6	1	2020-03-02-16-19-48	2020-03-02-16-19-48	38	6	59	Template reloc
2020	3	2	16	40	41.74	38.1801	22.6964	21.13	0.7	2	2020-03-02-16-40-41	2020-03-02-16-19-48	38	6	59	Detection relocated
2020	3	2	17	19	25.32	38.1796	22.6961	21.09	1	2	2020-03-02-17-19-25	2020-03-02-16-19-48	38	6	59	Detection relocated
2020	3	2	17	41	43.9	38.1797	22.6968	21.07	1	2	2020-03-02-17-41-43	2020-03-02-16-19-48	38	6	59	Detection relocated
2020	3	2	19	14	36.16	38.0719	22.9044	5.03	-0.2	2	2020-03-02-19-14-36	2020-05-23-02-13-42	6	2	63	Detection relocated
2020	3	2	20	34	2.071	38.1742	22.4627	15.89	1.4	1	2020-03-02-20-34-02	2020-03-02-20-34-02	41	10	64	Template reloc
2020	3	2	20	47	46.42	38.2164	22.6584	11.13	0.9	2	2020-03-02-20-47-46	2020-11-19-15-41-55	34	6	50	Detection relocated
2020	3	2	21	6	14.48	38.1807	22.7162	5.31	0.5	2	2020-03-02-21-06-14	2020-01-26-00-16-27	1	6	1	Detection relocated
2020	3	3	1	41	46.73	38.0722	22.9235	7.51	n/a	2	2020-03-03-01-41-46	2020-02-24-01-40-56	23	2	41	Detection relocated
2020	3	3	3	44	37.99	38.1921	22.6885	16.49	0.5	2	2020-03-03-03-44-37	2020-02-28-02-12-14	38	6	59	Detection relocated
2020	3	3	4	22	33.15	38.0718	22.9142	5.39	0.2	2	2020-03-03-04-22-33	2020-05-24-20-08-36	6	2	63	Detection relocated
2020	3	3	8	53	0.910004	38.0669	22.9198	7.56	0.4	2	2020-03-03-08-53-00	2020-02-24-01-40-56	23	2	41	Detection relocated
2020	3	3	10	1	12.58	38.083	22.8892	11.82	0.2	2	2020-03-03-10-01-12	2020-02-24-10-31-24	32	3	48	Detection relocated
2020	3	3	15	4	30.29	38.1995	22.7041	17.34	n/a	2	2020-03-03-15-04-30	2020-02-28-02-12-14	38	6	59	Detection relocated
2020	3	3	15	52	56.76	38.0689	22.9217	7.44	0	2	2020-03-03-15-52-56	2020-02-24-01-40-56	23	2	41	Detection relocated
2020	3	3	16	46	59.94	38.0752	22.9254	5.9	n/a	2	2020-03-03-16-46-59	2020-05-24-20-08-36	6	2	63	Detection relocated
2020	3	3	16	49	10.54	38.0033	22.8899	9.98	0.1	2	2020-03-03-16-49-10	2020-02-24-18-54-02	23	3	41	Detection relocated
2020	3	3	18	37	49.48	38.0774	22.8824	11.68	0.6	2	2020-03-03-18-37-49	2020-02-24-10-31-24	32	3	48	Detection relocated
2020	3	3	20	14	0.0199966	38.0647	22.8727	8.74	0.5	2	2020-03-03-20-14-00	2020-03-09-07-53-04	23	3	41	Detection relocated
2020	3	4	5	21	28.68	38.0748	22.9229	5.95	0.5	2	2020-03-04-05-21-28	2020-05-24-20-08-36	6	2	63	Detection relocated
2020	3	4	13	13	53.79	38.0536	22.8694	11.92	n/a	2	2020-03-04-13-13-53	2020-02-24-13-55-20	23	2	41	Detection relocated
2020	3	4	22	32	58.16	38.0477	22.8777	5.88	1.2	2	2020-03-04-22-32-57	2020-03-08-08-27-31	23	2	37	Detection relocated
2020	3	5	6	25	14.42	38.0325	22.9302	7.18	0.3	2	2020-03-05-06-25-14	2020-05-21-20-42-14	6	2	42	Detection relocated
2020	3	5	14	26	17.38	38.0966	22.8783	12.32	0	2	2020-03-05-14-26-17	2020-03-06-02-29-41	42	2	65	Detection relocated
2020	3	5	15	44	16.677	38.1393	23.0396	39.42	1.5	1	2020-03-05-15-44-17	2020-03-05-15-44-17	43	0	66	Template loc
2020	3	5	16	46	37.57	38.0979	22.8773	12.34	0.1	2	2020-03-05-16-46-37	2020-03-06-02-29-41	42	2	65	Detection relocated
2020	3	5	17	10	9.84	38.0729	22.9171	5.45	0	2	2020-03-05-17-10-09	2020-05-24-20-08-36	6	2	63	Detection relocated
2020	3	5	20	31	17.72	38.0462	22.8336	13.15	0.4	2	2020-03-05-20-31-17	2020-03-05-21-01-37	44	5	67	Detection relocated
2020	3	5	21	1	37.14	38.0405	22.8332	12.87	1.6	1	2020-03-05-21-01-37	2020-03-05-21-01-37	44	5	67	Template reloc
2020	3	5	23	47	6.229	38.0667	22.7646	9.78	1.1	1	2020-03-05-23-46-46	2020-03-05-23-46-46	45	4	68	Template reloc
2020	3	6	0	33	15.37	38.0741	22.9213	6	0	2	2020-03-06-00-33-15	2020-05-24-20-08-36	6	2	63	Detection relocated
2020	3	6	2	29	40.756	38.1017	22.8923	12.31	1.6	1	2020-03-06-02-29-41	2020-03-06-02-29-41	42	2	65	Template reloc
2020	3	6	2	36	49.14	38.0961	22.8748	12.52	0.2	2	2020-03-06-02-36-49	2020-03-06-02-29-41	42	2	65	Detection relocated
2020	3	6	2	42	10.6	38.1447	22.6886	11.5	0.8	2	2020-03-06-02-42-10	2020-03-08-00-41-09	39	8	60	Detection relocated
2020	3	6	7	28	55.77	38.0722	22.9148	5.46	0.1	2	2020-03-06-07-28-55	2020-05-24-20-08-36	6	2	63	Detection relocated
2020	3	6	7	29	22.49	38.074	22.9196	5.73	0.1	2	2020-03-06-07-29-22	2020-05-24-20-08-36	6	2	63	Detection relocated
2020	3	6	8	4	18.03	38.0434	22.7644	11.04	0.6	2	2020-03-06-08-04-18	2020-03-05-23-46-46	45	4	68	Detection relocated
2020	3	6	9	45	48.16	38.1499	22.6734	4.62	0.3	2	2020-03-06-09-45-48	2020-03-08-00-38-58	39	8	60	Detection relocated
2020	3	6	9	46	37.94	38.1495	22.6863	9.15	n/a	2	2020-03-06-09-46-37	2020-03-08-00-41-09	39	8	60	Detection relocated
2020	3	6	12	38	34.46	38.1543	22.6739	4.49	n/a	2	2020-03-06-12-38-34	2020-03-08-00-38-58	39	8	60	Detection relocated
2020	3	6	13	56	48.28	38.2507	22.6987	4.61	0.9	2	2020-03-06-13-56-48	2020-03-30-07-07-04	46	7	69	Detection relocated
2020	3	6	15	58	40.76	38.1444	22.6757	10.57	1.4	2	2020-03-06-15-58-40	2020-03-08-00-41-09	39	8	60	Detection relocated
2020	3	6	20	37	0.699997	38.147	22.679	14.19	0.9	2	2020-03-06-20-37-01	2020-03-08-00-41-09	39	8	60	Detection relocated
2020	3	6	21	35	9.78	38.0621	22.828	11.64	0.6	2	2020-03-06-21-35-09	2020-04-27-00-02-17	44	3	67	Detection relocated
2020	3	6	21	40	8.84	38.0739	22.9221	5.94	0.2	2	2020-03-06-21-40-08	2020-05-24-20-08-36	6	2	63	Detection relocated
2020	3	7	5	33	52.4	38.0678	22.9406	7.27	n/a	2	2020-03-07-05-33-52	2020-05-11-14-30-34	6	2	42	Detection relocated
2020	3	7	6	15	55.12	38.0134	22.9204	7.2	n/a	2	2020-03-07-06-15-54	2020-08-05-05-35-16	6	2	15	Detection relocated
2020	3	7	6	49	49.06	38.0522	22.9486	8.97	n/a	2	2020-03-07-06-49-48	2020-08-05-05-35-16	6	2	15	Detection relocated
2020	3	7	7	59	55.45	38.0395	22.9459	7.84	n/a	2	2020-03-07-07-59-55	2020-07-06-19-54-03	6	1	9	Detection relocated
2020	3	7	8	20	11.57	38.1494	22.9741	6.16	3.9	1	2020-03-07-08-20-11	2020-03-07-08-20-11	6	2	18	Template reloc
2020	3	7	12	55	7.57	38.1472	22.9618	13.11	2.1	1	2020-03-07-12-55-08	2020-03-07-12-55-08	6	2	18	Template reloc
2020	3	7	12	58	13.29	38.2061	22.9804	15.73	0.7	2	2020-03-07-12-58-13	2020-03-07-12-55-08	6	2	18	Detection relocated
2020	3	7	16	22	8.751	38.0606	22.9378	6.92	n/a	2	2020-03-07-16-22-08	2020-05-14-11-05-17	6	2	51	Detection fixed reloc
2020	3	7	17	16	53.04	38.0755	22.9273	5.99	0.4	2	2020-03-07-17-16-53	2020-05-24-20-08-36	6	2	63	Detection relocated
2020	3	7	19	8	6.44	38.0752	22.9254	5.95	0.4	2	2020-03-07-19-08-06	2020-05-24-20-08-36	6	2	63	Detection relocated
2020	3	7	22	43	4.52	38.076	22.9282	5.83	0.1	2	2020-03-07-22-43-04	2020-05-24-20-08-36	6	2	63	Detection relocated
2020	3	8	0	7	28.83	38.0732	22.9213	5.96	0	2	2020-03-08-00-07-28	2020-05-24-20-08-36	6	2	63	Detection relocated
2020	3	8	0	38	58.594	38.1493	22.6745	4.71	0.9	1	2020-03-08-00-38-58	2020-03-08-00-38-58	39	8	60	Template reloc
2020	3	8	0	39	12.838	38.127	22.6774	11.24	2	1	2020-03-08-00-38-14	2020-03-08-00-38-14	39	8	60	Template reloc
2020	3	8	0	41	9.079	38.1412	22.6765	11.54	2.2	1	2020-03-08-00-41-09	2020-03-08-00-41-09	39	8	60	Template reloc
2020	3	8	0	43	24.57	38.1395	22.6782	11.63	1.1	2	2020-03-08-00-43-24	2020-03-08-00-41-09	39	8	60	Detection relocated
2020	3	8	0	45	38.8	38.1486	22.669	11.7	1.1	2	2020-03-08-00-45-38	2020-03-08-00-41-09	39	8	60	Detection relocated
2020	3	8	0	46	7.97	38.1392	22.6732	9.7	n/a	2	2020-03-08-00-46-07	2020-03-08-00-41-09	39	8	60	Detection relocated
2020	3	8	0	47	47.37	38.1405	22.6762	11.04	1	2	2020-03-08-00-47-47	2020-03-08-00-41-09	39	8	60	Detection relocated
2020	3	8	0	52	57.34	38.1414	22.6771	11.3	1.5	2	2020-03-08-00-52-57	2020-03-08-00-41-09	39	8	60	Detection relocated
2020	3	8	0	55	21.46	38.1438	22.6755	6.11	0.2	2	2020-03-08-00-55-21	2020-03-08-00-38-58	39	8	60	Detection relocated
2020	3	8	1	44	40.95	38.0607	22.8613	5.82	0.6	2	2020-03-08-01-44-40	2020-03-08-08-27-31	23	2	37	Detection relocated
2020	3	8	2	55	24.17	38.15	22.6743	4.62	0.2	2	2020-03-08-02-55-24	2020-03-08-00-38-58	39	8	60	Detection relocated
2020	3	8	4	11	28.5	37.9937	22.9472	8.75	0	2	2020-03-08-04-11-28	2020-07-07-13-29-46	6	1	42	Detection relocated
2020	3	8	4	35	36.48	38.0693	22.8775	11.43	0.9	2	2020-03-08-04-35-36	2020-02-21-21-38-17	24	3	37	Detection relocated
2020	3	8	8	27	30.388	38.0682	22.8646	7.18	1.7	1	2020-03-08-08-27-31	2020-03-08-08-27-31	23	2	37	Template reloc
2020	3	8	9	49	34.55	38.0164	22.8811	9.95	n/a	2	2020-03-08-09-49-34	2020-02-24-18-54-02	23	3	41	Detection relocated
2020	3	8	10	45	46.82	38.1392	22.6773	11.7	n/a	2	2020-03-08-10-45-46	2020-03-08-00-41-09	39	8	60	Detection relocated
2020	3	8	10	54	22.25	38.0736	22.861	6.72	n/a	2	2020-03-08-10-54-22	2020-03-08-08-27-31	23	2	37	Detection relocated
2020	3	8	11	17	55.21	38.1523	22.6783	5.87	n/a	2	2020-03-08-11-17-55	2020-03-08-00-38-58	39	8	60	Detection relocated
2020	3	8	11	18	16.83	38.1376	22.677	11.45	n/a	2	2020-03-08-11-18-16	2020-03-08-00-41-09	39	8	60	Detection relocated
2020	3	8	12	19	41.84	38.0339	22.8853	9.32	1.1	2	2020-03-08-12-19-41	2020-02-24-18-54-02	23	3	41	Detection relocated
2020	3	8	14	24	53.94	38.0669	22.8777	11.62	n/a	2	2020-03-08-14-24-53	2020-02-26-10-09-35	23	3	41	Detection relocated
2020	3	8	14	36	53.385	38.241	22.719	11.18	1.4	1	2020-03-08-14-36-53	2020-03-08-14-36-53	47	7	70	Template reloc
2020	3	8	14	59	44.68	38.1446	22.6807	9.77	n/a	2	2020-03-08-14-59-44	2020-03-08-00-41-09	39	8	60	Detection relocated
2020	3	8	16	38	55.66	38.026	22.8833	9.29	1.2	2	2020-03-08-16-38-55	2020-02-24-18-54-02	23	3	41	Detection relocated
2020	3	8	19	35	49.02	38.058	22.8741	8.71	0	2	2020-03-08-19-35-48	2020-03-09-07-53-04	23	3	41	Detection relocated
2020	3	8	19	37	29.6	38.0557	22.936	7.74	0.1	2	2020-03-08-19-37-29	2020-05-15-22-57-01	6	2	71	Detection relocated
2020	3	8	20	27	35.52	38.0614	22.9466	7.96	0	2	2020-03-08-20-27-35	2020-05-15-22-57-01	6	2	71	Detection relocated
2020	3	8	21	22	39.64	38.0705	22.8777	11.48	1.1	2	2020-03-08-21-22-39	2020-02-21-21-38-17	24	3	37	Detection relocated
2020	3	8	22	42	15.24	38.0662	22.8754	5.42	n/a	2	2020-03-08-22-42-15	2020-02-24-13-55-20	23	2	41	Detection relocated
2020	3	8	23	2	16.86	38.0521	22.8763	9.41	1	2	2020-03-08-23-02-16	2020-02-21-21-38-17	24	3	37	Detection relocated
2020	3	8	23	22	3.16	38.0782	22.871	12.44	1.2	2	2020-03-08-23-22-03	2020-02-21-21-38-17	24	3	37	Detection relocated
2020	3	9	4	39	2.67	38.1405	22.6765	11.9	1.2	2	2020-03-09-04-39-02	2020-03-08-00-41-09	39	8	60	Detection relocated
2020	3	9	4	58	46.36	38.0768	22.9242	5.31	n/a	2	2020-03-09-04-58-46	2020-02-24-01-40-56	23	2	41	Detection relocated
2020	3	9	7	10	47.51	38.0635	22.8737	6.88	1	2	2020-03-09-07-10-47	2020-02-24-13-55-20	23	2	41	Detection relocated
2020	3	9	7	53	4.615	38.0621	22.8736	8.66	1.5	1	2020-03-09-07-53-04	2020-03-09-07-53-04	23	3	41	Template reloc
2020	3	9	10	28	43.49	38.0441	22.8764	9.88	n/a	2	2020-03-09-10-28-43	2020-02-26-10-09-35	23	3	41	Detection relocated
2020	3	9	10	31	11.59	38.1414	22.6775	11.59	1.5	2	2020-03-09-10-31-11	2020-03-08-00-41-09	39	8	60	Detection relocated
2020	3	9	10	32	41.89	38.0282	22.8833	10.08	0.5	2	2020-03-09-10-32-41	2020-02-24-18-54-02	23	3	41	Detection relocated
2020	3	9	13	25	35.97	38.0437	22.9399	2.56	0	2	2020-03-09-13-25-35	2020-05-09-00-00-51	48	1	72	Detection relocated
2020	3	9	15	3	25.1	38.2398	22.5878	12.17	1.1	2	2020-03-09-15-03-25	2020-02-28-02-22-03	37	10	58	Detection relocated
2020	3	9	16	13	56.45	38.0789	22.8584	5.55	0.9	2	2020-03-09-16-13-56	2020-03-08-08-27-31	23	2	37	Detection relocated
2020	3	9	17	0	25.1	38.0704	22.8901	9.98	n/a	2	2020-03-09-17-00-25	2020-02-21-21-38-17	24	3	37	Detection relocated
2020	3	9	18	48	30.12	38.0635	22.8735	6.93	0.9	2	2020-03-09-18-48-30	2020-02-24-13-55-20	23	2	41	Detection relocated
2020	3	9	18	50	3.24	38.064	22.8743	7.45	0.6	2	2020-03-09-18-50-03	2020-03-08-08-27-31	23	2	37	Detection relocated
2020	3	9	23	49	38	38.0276	22.8835	9.97	0.7	2	2020-03-09-23-49-37	2020-02-24-18-54-02	23	3	41	Detection relocated
2020	3	10	0	46	57.83	38.0477	22.8849	10.54	0.7	2	2020-03-10-00-46-57	2020-02-24-18-54-02	23	3	41	Detection relocated
2020	3	10	1	22	42.61	38.0301	22.883	10.02	1.2	2	2020-03-10-01-22-42	2020-02-24-18-54-02	23	3	41	Detection relocated
2020	3	10	2	19	39.37	38.0701	22.9224	7.41	0.6	2	2020-03-10-02-19-39	2020-02-24-01-40-56	23	2	41	Detection relocated
2020	3	10	3	44	44.56	38.0656	22.9124	7.77	n/a	2	2020-03-10-03-44-44	2020-02-24-01-40-56	23	2	41	Detection relocated
2020	3	10	9	8	17.38	38.0676	22.8728	4.9	0.7	2	2020-03-10-09-08-17	2020-02-24-13-55-20	23	2	41	Detection relocated
2020	3	10	11	16	14.92	38.1574	22.6895	11.11	1	2	2020-03-10-11-16-14	2020-03-12-00-55-31	39	8	60	Detection relocated
2020	3	10	11	28	29.78	38.1478	22.6844	6.2	n/a	2	2020-03-10-11-28-29	2020-03-12-00-55-31	39	8	60	Detection relocated
2020	3	10	20	33	57.4	38.0744	22.8824	11.52	n/a	2	2020-03-10-20-33-57	2020-02-21-21-38-17	24	3	37	Detection relocated
2020	3	10	23	0	53.52	38.0633	22.8662	6.64	1.1	2	2020-03-10-23-00-53	2020-02-24-13-55-20	23	2	41	Detection relocated
2020	3	11	8	55	16.65	38.0626	22.9498	4.63	n/a	2	2020-03-11-08-55-16	2020-05-06-07-08-46	6	1	73	Detection relocated
2020	3	11	9	44	33.79	38.0716	22.8833	11.28	1.3	2	2020-03-11-09-44-33	2020-02-21-21-38-17	24	3	37	Detection relocated
2020	3	11	14	24	9.575	38.1469	22.7226	13.94	2.6	1	2020-03-11-14-24-08	2020-03-11-14-24-08	49	6	74	Template reloc
2020	3	11	19	40	40.1	38.0741	22.8803	11.51	0.3	2	2020-03-11-19-40-40	2020-02-21-21-38-17	24	3	37	Detection relocated
2020	3	11	21	30	4.36	38.0682	22.9382	9.03	-0.2	2	2020-03-11-21-30-04	2020-05-16-19-59-13	6	2	42	Detection relocated
2020	3	11	22	43	23.12	38.0487	22.885	12.47	0.5	2	2020-03-11-22-43-23	2020-02-21-21-38-17	24	3	37	Detection relocated
2020	3	11	23	11	47.8	38.0806	22.8854	11.8	0.1	2	2020-03-11-23-11-47	2020-02-24-10-31-24	32	3	48	Detection relocated
2020	3	12	0	55	30.052	38.1531	22.6785	11.59	1.7	1	2020-03-12-00-55-31	2020-03-12-00-55-31	39	8	60	Template reloc
2020	3	12	1	3	33.31	38.1451	22.6693	4.21	-0.1	2	2020-03-12-01-03-33	2020-03-08-00-38-58	39	8	60	Detection relocated
2020	3	12	1	4	10.06	38.1259	22.6755	7.69	0.9	2	2020-03-12-01-04-09	2020-03-08-00-41-09	39	8	60	Detection relocated
2020	3	12	1	14	41.04	38.1415	22.6769	11.26	0.9	2	2020-03-12-01-14-41	2020-03-08-00-41-09	39	8	60	Detection relocated
2020	3	12	1	50	15.76	38.1536	22.6827	5.6	1	2	2020-03-12-01-50-15	2020-03-08-00-38-58	39	8	60	Detection relocated
2020	3	12	3	54	26.99	38.1383	22.6762	11.21	n/a	2	2020-03-12-03-54-26	2020-03-08-00-41-09	39	8	60	Detection relocated
2020	3	12	5	1	31.96	38.1425	22.6756	3.79	0.6	2	2020-03-12-05-01-31	2020-03-08-00-38-58	39	8	60	Detection relocated
2020	3	12	6	0	33.19	38.1488	22.6764	3.47	0.6	2	2020-03-12-06-00-33	2020-03-08-00-38-58	39	8	60	Detection relocated
2020	3	12	6	32	49	38.1497	22.6753	4.93	1.2	2	2020-03-12-06-32-48	2020-03-08-00-38-58	39	8	60	Detection relocated
2020	3	12	7	3	11.64	38.1442	22.6739	4.52	1.2	2	2020-03-12-07-03-11	2020-03-08-00-38-58	39	8	60	Detection relocated
2020	3	12	7	40	41.23	38.1489	22.6774	4.9	1.2	2	2020-03-12-07-40-41	2020-03-08-00-38-58	39	8	60	Detection relocated
2020	3	12	9	56	35.09	38.1491	22.6773	5.39	1.5	2	2020-03-12-09-56-35	2020-03-08-00-38-58	39	8	60	Detection relocated
2020	3	12	10	0	16.54	38.1493	22.6791	5.1	1.4	2	2020-03-12-10-00-16	2020-03-08-00-38-58	39	8	60	Detection relocated
2020	3	12	16	8	26.87	38.2014	22.6242	16.15	1.1	2	2020-03-12-16-08-26	2020-02-17-06-30-32	28	9	43	Detection relocated
2020	3	12	19	43	18.26	38.0351	22.9516	7.11	n/a	2	2020-03-12-19-43-18	2020-07-01-10-56-34	6	1	42	Detection relocated
2020	3	13	0	16	56.319	38.1573	22.59	8.51	1.1	1	2020-03-13-00-16-48	2020-03-13-00-16-48	50	10	75	Template reloc
2020	3	13	1	25	34.07	38.1845	22.6997	4.82	0.9	2	2020-03-13-01-25-34	2021-01-13-08-45-03	15	6	27	Detection relocated
2020	3	13	1	46	12.7	38.1564	22.5905	8.49	0.5	2	2020-03-13-01-46-12	2020-03-13-00-16-48	50	10	75	Detection relocated
2020	3	13	15	23	34.72	38.1999	22.6177	16.48	1	2	2020-03-13-15-23-34	2020-02-18-02-46-53	28	9	43	Detection relocated
2020	3	14	6	3	33.61	38.1863	22.7253	5.3	n/a	2	2020-03-14-06-03-33	2021-04-21-15-25-19	36	6	57	Detection relocated
2020	3	14	8	27	53.53	38.0466	22.9111	5.32	n/a	2	2020-03-14-08-27-53	2020-07-05-23-33-34	51	2	76	Detection relocated
2020	3	14	13	28	44.8	38.2506	22.6987	4.59	1	2	2020-03-14-13-28-44	2020-03-30-07-07-04	46	7	69	Detection relocated
2020	3	15	2	45	8.917	38.1078	22.7144	9.42	1.2	1	2020-03-15-02-44-40	2020-03-15-02-44-40	52	8	77	Template reloc
2020	3	15	17	39	3.36	38.2002	22.6191	16.23	1.6	2	2020-03-15-17-39-03	2020-02-18-02-46-53	28	9	43	Detection relocated
2020	3	15	17	51	23.48	38.1069	22.7137	9.69	0.8	2	2020-03-15-17-51-23	2020-03-15-02-44-40	52	8	77	Detection relocated
2020	3	15	20	0	5.92	38.1077	22.7145	9.34	1.1	2	2020-03-15-20-00-05	2020-03-15-02-44-40	52	8	77	Detection relocated
2020	3	15	22	13	28.6	38.1069	22.7143	9.23	0.7	2	2020-03-15-22-13-28	2020-03-15-02-44-40	52	8	77	Detection relocated
2020	3	16	15	58	47.997	38.3535	22.6923	28.62	1.6	1	2020-03-16-15-58-47	2020-03-16-15-58-47	53	7	78	Template reloc
2020	3	16	21	21	17.68	38.1746	22.7206	8.95	1.1	1	2020-03-16-21-21-17	2020-03-16-21-21-17	14	6	25	Template reloc
2020	3	17	3	36	21.27	38.1108	22.7161	8.9	1.2	2	2020-03-17-03-36-21	2020-03-15-02-44-40	52	8	77	Detection relocated
2020	3	17	3	53	10.29	38.107	22.7135	9.48	0.6	2	2020-03-17-03-53-10	2020-03-15-02-44-40	52	8	77	Detection relocated
2020	3	17	3	58	26.78	38.1071	22.7139	9.44	0.6	2	2020-03-17-03-58-26	2020-03-15-02-44-40	52	8	77	Detection relocated
2020	3	17	3	58	59.63	38.1097	22.7155	9.24	1.1	2	2020-03-17-03-58-59	2020-03-15-02-44-40	52	8	77	Detection relocated
2020	3	17	4	3	33.44	38.0758	22.8784	11.74	0.5	2	2020-03-17-04-03-33	2020-02-24-10-31-24	32	3	48	Detection relocated
2020	3	17	20	51	49.96	38.1745	22.7208	9.07	0.1	2	2020-03-17-20-51-49	2020-03-16-21-21-17	14	6	25	Detection relocated
2020	3	18	6	47	40.95	38.0114	22.9752	7.61	0.6	2	2020-03-18-06-47-40	2020-03-20-01-36-14	6	1	79	Detection relocated
2020	3	18	7	59	23.959	38.1867	22.7344	12.22	1.5	1	2020-03-18-07-59-23	2020-03-18-07-59-23	14	6	25	Template reloc
2020	3	18	9	33	3.97	38.0283	22.9609	8.07	0.2	2	2020-03-18-09-33-03	2020-03-20-01-36-14	6	1	79	Detection relocated
2020	3	18	14	39	23.56	38.217	22.586	9.39	0.9	2	2020-03-18-14-39-23	2021-02-21-19-33-19	54	10	80	Detection relocated
2020	3	18	18	39	44.92	38.0136	22.9517	7.95	n/a	2	2020-03-18-18-39-44	2020-03-20-01-36-14	6	1	79	Detection relocated
2020	3	18	21	41	49.58	37.9842	22.8896	8.72	0.3	2	2020-03-18-21-41-49	2020-02-24-18-54-02	23	3	41	Detection relocated
2020	3	19	0	17	36.05	38.0662	22.8721	8.82	-0.2	2	2020-03-19-00-17-36	2020-03-09-07-53-04	23	3	41	Detection relocated
2020	3	19	6	42	1.78	38.04	22.9085	10.73	n/a	2	2020-03-19-06-42-01	2020-04-28-02-43-29	55	2	48	Detection relocated
2020	3	19	7	54	10.35	38.0361	22.8837	6.64	n/a	2	2020-03-19-07-54-10	2020-02-24-18-54-02	23	3	41	Detection relocated
2020	3	19	20	32	20.48	38.0245	22.963	6.54	n/a	2	2020-03-19-20-32-20	2020-04-05-02-42-13	6	1	79	Detection relocated
2020	3	19	21	32	21	38.1802	22.7055	4.5	0.4	2	2020-03-19-21-32-21	2021-01-13-08-45-03	15	6	27	Detection relocated
2020	3	19	21	46	46.849	38.2014	22.5607	16.51	1.4	1	2020-03-19-21-46-47	2020-03-19-21-46-47	56	10	81	Template reloc
2020	3	19	22	49	41.2	38.0315	22.9661	8.03	0	2	2020-03-19-22-49-41	2020-03-20-01-36-14	6	1	79	Detection relocated
2020	3	20	1	35	16.52	38.0368	22.9578	8.13	0	2	2020-03-20-01-35-16	2020-03-20-01-36-14	6	1	79	Detection relocated
2020	3	20	1	36	31.947	38.0272	22.9624	8.06	2.5	1	2020-03-20-01-36-14	2020-03-20-01-36-14	6	1	79	Template reloc
2020	3	20	4	7	4.28	38.009	22.9666	5.5	0.2	2	2020-03-20-04-07-04	2020-04-21-03-28-13	6	1	79	Detection relocated
2020	3	20	4	15	39.36	38.0307	22.9654	6.57	n/a	2	2020-03-20-04-15-39	2020-04-05-02-42-13	6	1	79	Detection relocated
2020	3	20	15	53	5.41	38.028	22.9611	8.07	1.2	2	2020-03-20-15-53-05	2020-03-20-01-36-14	6	1	79	Detection relocated
2020	3	20	20	18	21.46	38.0148	22.9574	7.85	n/a	2	2020-03-20-20-18-21	2020-03-20-01-36-14	6	1	79	Detection relocated
2020	3	20	20	37	13.48	38.0287	22.9622	6.79	0.2	2	2020-03-20-20-37-13	2020-04-03-09-36-54	6	1	79	Detection relocated
2020	3	20	21	28	40.06	38.0218	22.9582	6.76	0	2	2020-03-20-21-28-40	2020-04-03-09-36-54	6	1	79	Detection relocated
2020	3	21	0	33	41.84	38.0339	22.9684	6.75	-0.1	2	2020-03-21-00-33-41	2020-04-03-09-36-54	6	1	79	Detection relocated
2020	3	21	8	11	6.87	38.0148	22.9507	6.63	n/a	2	2020-03-21-08-11-06	2020-04-03-09-36-54	6	1	79	Detection relocated
2020	3	21	15	51	1.55	38.0295	22.9677	6.73	n/a	2	2020-03-21-15-51-01	2020-04-03-09-15-41	6	1	79	Detection relocated
2020	3	21	18	14	57.98	38.0448	22.9651	6.25	0.5	2	2020-03-21-18-14-57	2020-04-04-01-45-18	6	1	79	Detection relocated
2020	3	21	22	25	28.12	38.0154	22.9755	7.8	0.5	2	2020-03-21-22-25-28	2020-03-20-01-36-14	6	1	79	Detection relocated
2020	3	21	22	45	52.64	38.0085	22.9455	6.43	n/a	2	2020-03-21-22-45-52	2020-04-03-09-36-54	6	1	79	Detection relocated
2020	3	21	23	11	8.56	38.0206	22.9574	6.79	0.1	2	2020-03-21-23-11-08	2020-04-03-09-36-54	6	1	79	Detection relocated
2020	3	21	23	25	27.043	38.1743	22.6591	13.27	2.3	1	2020-03-21-23-25-28	2020-03-21-23-25-28	57	9	82	Template reloc
2020	3	21	23	40	4.88	38.1762	22.7051	6.28	0.5	2	2020-03-21-23-40-04	2020-09-07-02-50-31	58	6	83	Detection relocated
2020	3	22	8	39	16.09	38.0412	22.9745	6.12	1.4	1	2020-03-22-08-39-16	2020-03-22-08-39-16	6	1	84	Template reloc
2020	3	22	12	24	10.69	38.028	22.9618	6.58	0.3	2	2020-03-22-12-24-10	2020-04-05-02-42-13	6	1	79	Detection relocated
2020	3	22	17	7	50.38	38.0293	22.9619	6.79	n/a	2	2020-03-22-17-07-50	2020-04-03-09-36-54	6	1	79	Detection relocated
2020	3	22	17	12	38.86	38.0225	22.9601	8.06	0.4	2	2020-03-22-17-12-38	2020-03-20-01-36-14	6	1	79	Detection relocated
2020	3	22	19	36	58.4	38.1452	22.6781	13.65	0.8	2	2020-03-22-19-36-58	2020-09-25-04-39-05	59	8	85	Detection relocated
2020	3	22	20	31	7.48	38.0099	22.947	6.52	0.5	2	2020-03-22-20-31-07	2020-04-03-09-36-54	6	1	79	Detection relocated
2020	3	23	16	19	43.872	38.2078	22.6178	16.27	2.3	1	2020-03-23-16-19-44	2020-03-23-16-19-44	28	9	43	Template reloc
2020	3	23	16	21	33.85	38.2072	22.6181	16.08	1.5	2	2020-03-23-16-21-33	2020-03-23-16-19-44	28	9	43	Detection relocated
2020	3	23	16	24	42.41	38.2152	22.6183	5.51	0.9	2	2020-03-23-16-24-42	2020-03-23-21-40-26	28	10	43	Detection relocated
2020	3	23	16	25	16.25	38.2069	22.619	16.1	0.9	2	2020-03-23-16-25-16	2020-03-23-16-19-44	28	9	43	Detection relocated
2020	3	23	16	48	42.06	38.2102	22.6173	5.71	0.4	2	2020-03-23-16-48-42	2020-05-05-19-22-08	28	10	43	Detection relocated
2020	3	23	16	59	52.5	38.2104	22.6164	5.6	0.4	2	2020-03-23-16-59-52	2020-05-05-19-22-08	28	10	43	Detection relocated
2020	3	23	18	22	57.78	38.2101	22.6169	5.67	0.9	2	2020-03-23-18-22-57	2020-05-05-19-22-08	28	10	43	Detection relocated
2020	3	23	18	59	41.78	38.2101	22.616	5.69	0.6	2	2020-03-23-18-59-41	2020-05-05-19-22-08	28	10	43	Detection relocated
2020	3	23	19	1	55.64	38.2003	22.6141	16.99	0.5	2	2020-03-23-19-01-55	2020-02-18-02-46-53	28	9	43	Detection relocated
2020	3	23	19	16	8.18	38.199	22.6198	16.41	0.6	2	2020-03-23-19-16-08	2020-02-18-02-46-53	28	9	43	Detection relocated
2020	3	23	21	40	26.691	38.2152	22.6185	5.51	1.4	1	2020-03-23-21-40-26	2020-03-23-21-40-26	28	10	43	Template reloc
2020	3	23	23	33	0.949997	38.2152	22.6152	15.03	1.6	1	2020-03-23-23-33-00	2020-03-23-23-33-00	28	9	43	Template reloc
2020	3	23	23	37	20.98	38.0279	22.9611	6.78	0	2	2020-03-23-23-37-20	2020-04-03-09-36-54	6	1	79	Detection relocated
2020	3	24	13	39	21.691	38.2272	22.5916	23.12	1.5	1	2020-03-24-13-39-21	2020-03-24-13-39-21	60	10	58	Template reloc
2020	3	24	23	34	55.309	38.1896	22.6112	22.86	1.4	1	2020-03-24-23-34-55	2020-03-24-23-34-55	28	10	43	Template reloc
2020	3	25	23	12	12.266	38.2571	22.7171	16.63	1.8	1	2020-03-25-23-12-12	2020-03-25-23-12-12	61	7	86	Template reloc
2020	3	26	1	41	57.758	38.2614	22.7197	17.78	1.8	1	2020-03-26-01-41-58	2020-03-26-01-41-58	61	7	86	Template reloc
2020	3	27	4	29	38.747	38.1715	22.604	16.76	1.6	1	2020-03-27-04-29-40	2020-03-27-04-29-40	62	9	44	Template reloc
2020	3	27	14	41	4.61	38.083	22.7338	5.35	n/a	2	2020-03-27-14-41-04	2020-03-27-15-17-08	63	4	87	Detection relocated
2020	3	27	15	12	57.859	38.168	22.7269	2.81	1.8	1	2020-03-27-15-12-58	2020-03-27-15-12-58	64	6	87	Template reloc
2020	3	27	15	17	8.395	38.0836	22.7559	12.29	1.7	1	2020-03-27-15-17-08	2020-03-27-15-17-08	63	4	87	Template reloc
2020	3	27	15	18	14.39	38.0834	22.734	5.42	1.2	2	2020-03-27-15-18-14	2020-03-27-15-17-08	63	4	87	Detection relocated
2020	3	27	20	4	34.88	38.0837	22.7329	5.28	n/a	2	2020-03-27-20-04-34	2020-03-27-15-17-08	63	4	87	Detection relocated
2020	3	27	20	23	15.46	38.0834	22.7336	5.32	1	2	2020-03-27-20-23-15	2020-03-27-15-17-08	63	4	87	Detection relocated
2020	3	27	20	25	49.96	38.0828	22.7339	5.37	1.1	2	2020-03-27-20-25-49	2020-03-27-15-17-08	63	4	87	Detection relocated
2020	3	27	20	45	1.18	38.0829	22.7331	4.89	1.1	2	2020-03-27-20-45-01	2020-03-27-15-17-08	63	4	87	Detection relocated
2020	3	28	1	17	25.45	38.0612	22.8913	9.3	0.1	2	2020-03-28-01-17-25	2020-06-24-06-03-24	65	2	88	Detection relocated
2020	3	28	5	16	32.73	38.127	22.7357	13	1.5	1	2020-03-28-05-16-08	2020-03-28-05-16-08	63	8	87	Template reloc
2020	3	28	5	18	57.56	38.118	22.7361	12.14	1	2	2020-03-28-05-18-57	2020-03-28-05-16-08	63	8	87	Detection relocated
2020	3	30	7	7	4.877	38.2511	22.6986	4.54	1.4	1	2020-03-30-07-07-04	2020-03-30-07-07-04	46	7	69	Template reloc
2020	3	30	9	52	57.3	38.0198	22.9665	6.75	0.2	2	2020-03-30-09-52-57	2020-04-03-09-15-41	6	1	79	Detection relocated
2020	3	31	6	56	29.802	38.0197	22.8408	15.93	1.3	1	2020-03-31-06-56-33	2020-03-31-06-56-33	66	3	89	Template reloc
2020	3	31	12	6	38.56	38.0254	22.8415	15.8	0.9	2	2020-03-31-12-06-38	2020-03-31-06-56-33	66	3	89	Detection relocated
2020	4	1	17	12	10.98	38.0151	22.954	6.69	n/a	2	2020-04-01-17-12-10	2020-04-03-09-36-54	6	1	79	Detection relocated
2020	4	1	18	25	1.4	38.1207	22.7589	9.24	0.7	2	2020-04-01-18-25-01	2020-10-01-16-49-54	67	4	90	Detection relocated
2020	4	3	4	53	31.44	38.0409	22.9637	6.06	n/a	2	2020-04-03-04-53-31	2020-04-04-01-45-18	6	1	79	Detection relocated
2020	4	3	5	7	55.864	38.1906	22.7384	21.96	1.6	1	2020-04-03-05-07-55	2020-04-03-05-07-55	68	6	91	Template reloc
2020	4	3	9	8	32.71	38.0424	22.9797	6.32	n/a	2	2020-04-03-09-08-32	2020-04-05-02-42-13	6	1	79	Detection relocated
2020	4	3	9	15	53.547	38.0306	22.9651	6.84	2	1	2020-04-03-09-15-41	2020-04-03-09-15-41	6	1	79	Template reloc
2020	4	3	9	36	52.423	38.0249	22.9602	6.75	1.6	1	2020-04-03-09-36-54	2020-04-03-09-36-54	6	1	79	Template reloc
2020	4	3	11	31	12.16	38.0405	22.9531	6.21	-0.2	2	2020-04-03-11-31-12	2020-04-04-01-45-18	6	1	79	Detection relocated
2020	4	3	13	31	27.89	38.0558	22.9269	6.41	0	2	2020-04-03-13-31-27	2020-07-06-20-38-19	6	2	92	Detection relocated
2020	4	3	15	59	58.34	38.0101	22.9485	6.52	n/a	2	2020-04-03-15-59-58	2020-04-03-09-36-54	6	1	79	Detection relocated
2020	4	3	16	43	1.94	38.0358	22.9692	6.22	n/a	2	2020-04-03-16-43-01	2020-04-14-04-53-28	6	1	79	Detection relocated
2020	4	3	17	3	49.16	38.0511	22.9297	6.24	n/a	2	2020-04-03-17-03-49	2020-07-06-20-38-19	6	2	92	Detection relocated
2020	4	3	18	19	45.44	38.0455	22.9679	6.26	0.8	2	2020-04-03-18-19-45	2020-04-04-01-45-18	6	1	79	Detection relocated
2020	4	4	1	45	17.501	38.0427	22.9601	6.21	1.4	1	2020-04-04-01-45-18	2020-04-04-01-45-18	6	1	79	Template reloc
2020	4	4	1	51	12.37	38.04	22.9517	6.21	-0.2	2	2020-04-04-01-51-12	2020-04-04-01-45-18	6	1	79	Detection relocated
2020	4	4	4	37	15.76	38.0343	22.9678	6.77	n/a	2	2020-04-04-04-37-15	2020-04-03-09-36-54	6	1	79	Detection relocated
2020	4	4	5	36	35.62	38.0438	22.9732	6.11	n/a	2	2020-04-04-05-36-35	2020-04-04-01-45-18	6	1	79	Detection relocated
2020	4	4	7	1	30.21	38.0079	22.9697	5.53	n/a	2	2020-04-04-07-01-30	2020-04-21-03-28-13	6	1	79	Detection relocated
2020	4	4	7	8	45.38	38.0365	22.9708	6.58	0.8	2	2020-04-04-07-08-45	2020-04-05-02-42-13	6	1	79	Detection relocated
2020	4	4	8	7	51.3	38.0277	22.9919	5.27	n/a	2	2020-04-04-08-07-51	2020-04-21-03-28-13	6	1	79	Detection relocated
2020	4	4	12	39	46.26	38.0268	22.9732	6.5	n/a	2	2020-04-04-12-39-46	2020-05-09-05-42-20	6	1	84	Detection relocated
2020	4	4	16	41	9.35	38.0446	22.9595	6.32	1.8	2	2020-04-04-16-41-09	2020-04-04-01-45-18	6	1	79	Detection relocated
2020	4	4	17	51	18.2	38.0441	22.9655	6.24	-0.2	2	2020-04-04-17-51-18	2020-04-04-01-45-18	6	1	79	Detection relocated
2020	4	4	22	18	12.6	38.0295	22.9618	6.75	-0.3	2	2020-04-04-22-18-12	2020-04-03-09-36-54	6	1	79	Detection relocated
2020	4	5	2	42	12.695	38.0345	22.9682	6.63	2.3	1	2020-04-05-02-42-13	2020-04-05-02-42-13	6	1	79	Template reloc
2020	4	5	3	15	52.17	38.0405	22.9512	6.2	0.1	2	2020-04-05-03-15-52	2020-04-04-01-45-18	6	1	79	Detection relocated
2020	4	5	3	29	8.67	38.0297	22.9657	6.78	1.2	2	2020-04-05-03-29-08	2020-04-03-09-15-41	6	1	79	Detection relocated
2020	4	5	3	38	46.15	38.0214	22.9579	6.77	-0.1	2	2020-04-05-03-38-46	2020-04-03-09-36-54	6	1	79	Detection relocated
2020	4	5	3	52	59	38.0415	22.9764	6.08	0	2	2020-04-05-03-52-58	2020-04-04-01-45-18	6	1	79	Detection relocated
2020	4	5	13	12	57.876	38.1979	22.5602	29.13	1.6	1	2020-04-05-13-12-57	2020-04-05-13-12-57	69	10	93	Template reloc
2020	4	5	18	0	32.96	38.012	22.9512	6.56	0	2	2020-04-05-18-00-32	2020-04-03-09-36-54	6	1	79	Detection relocated
2020	4	6	0	46	37.69	38.0433	22.9687	6.58	n/a	2	2020-04-06-00-46-37	2020-04-03-09-15-41	6	1	79	Detection relocated
2020	4	6	3	47	30.9	38.0087	22.9734	5.5	0.1	2	2020-04-06-03-47-30	2020-04-21-03-28-13	6	1	79	Detection relocated
2020	4	6	18	55	4.24	38.3133	22.8315	18.37	n/a	2	2020-04-06-18-55-04	2021-01-31-22-12-05	21	0	35	Detection relocated
2020	4	7	10	45	56.47	38.0289	22.9619	6.82	n/a	2	2020-04-07-10-45-56	2020-04-03-09-36-54	6	1	79	Detection relocated
2020	4	9	20	45	48.855	38.034	22.9858	5.99	1.8	1	2020-04-09-20-45-49	2020-04-09-20-45-49	6	1	94	Template reloc
2020	4	10	0	15	2.35	38.1755	22.7402	15.53	1	2	2020-04-10-00-15-02	2020-04-10-09-26-30	14	6	25	Detection relocated
2020	4	10	9	26	31.006	38.1762	22.7401	15.65	1.6	1	2020-04-10-09-26-30	2020-04-10-09-26-30	14	6	25	Template reloc
2020	4	10	10	3	2.3	38.1756	22.7398	15.57	0.9	2	2020-04-10-10-03-02	2020-04-10-09-26-30	14	6	25	Detection relocated
2020	4	10	11	32	46.3	38.1748	22.7379	15.56	n/a	2	2020-04-10-11-32-46	2020-04-10-09-26-30	14	6	25	Detection relocated
2020	4	10	16	13	10.2	38.009	22.9696	5.49	-0.1	2	2020-04-10-16-13-10	2020-04-21-03-28-13	6	1	79	Detection relocated
2020	4	11	1	5	46.83	38.0081	22.9626	5.53	0.4	2	2020-04-11-01-05-46	2020-04-21-03-28-13	6	1	79	Detection relocated
2020	4	11	2	15	41.35	38.0638	22.8285	11.68	0.6	2	2020-04-11-02-15-41	2020-04-27-00-02-17	44	3	67	Detection relocated
2020	4	11	19	6	27.58	38.0342	22.9816	6.22	0.9	2	2020-04-11-19-06-27	2020-04-05-02-42-13	6	1	79	Detection relocated
2020	4	11	21	24	0.379997	38.1722	22.5698	7.76	1	1	2020-04-11-21-24-00	2020-04-11-21-24-00	70	10	95	Template reloc
2020	4	12	3	41	14.95	38.0376	22.958	6.58	n/a	2	2020-04-12-03-41-14	2020-04-13-13-58-38	6	1	84	Detection relocated
2020	4	12	5	10	0.629997	38.0571	22.9436	7.92	n/a	2	2020-04-12-05-10-00	2020-08-05-05-35-16	6	2	15	Detection relocated
2020	4	12	7	8	47.02	38.0389	22.9829	7.77	n/a	2	2020-04-12-07-08-47	2020-03-20-01-36-14	6	1	79	Detection relocated
2020	4	12	7	21	42.83	38.044	22.9624	6.24	-0.1	2	2020-04-12-07-21-42	2020-04-04-01-45-18	6	1	79	Detection relocated
2020	4	12	10	33	26.28	38.0322	22.9689	8.01	0.3	2	2020-04-12-10-33-26	2020-03-20-01-36-14	6	1	79	Detection relocated
2020	4	12	11	30	9.389	38.1533	22.6447	19.97	1.6	1	2020-04-12-11-30-02	2020-04-12-11-30-02	6	9	79	Template loc
2020	4	12	11	47	47.39	38.0101	22.9711	5.48	-0.5	2	2020-04-12-11-47-47	2020-04-21-03-28-13	6	1	79	Detection relocated
2020	4	12	12	2	37.21	38.0499	22.9741	7.97	3.2	1	2020-04-12-12-02-38	2020-04-12-12-02-38	6	1	79	Template reloc
2020	4	12	12	34	34.15	38.0432	22.9581	6.23	n/a	2	2020-04-12-12-34-34	2020-04-04-01-45-18	6	1	79	Detection relocated
2020	4	12	15	28	43.01	38.0214	23.0079	4.97	1.3	1	2020-04-12-15-28-43	2020-04-12-15-28-43	6	1	84	Template reloc
2020	4	12	18	41	40.72	38.0632	22.9153	11.5	-0.2	2	2020-04-12-18-41-40	2020-04-28-02-43-29	55	2	48	Detection relocated
2020	4	12	19	35	50.4	38.0517	22.9329	7.91	n/a	2	2020-04-12-19-35-50	2020-08-05-05-35-16	6	2	15	Detection relocated
2020	4	12	20	56	3.52	38.0416	22.951	6.23	-0.4	2	2020-04-12-20-56-03	2020-04-04-01-45-18	6	1	79	Detection relocated
2020	4	12	23	39	37.9	38.0316	22.9666	8.04	0.8	2	2020-04-12-23-39-37	2020-03-20-01-36-14	6	1	79	Detection relocated
2020	4	13	5	4	58.43	38.0444	22.9292	7.79	n/a	2	2020-04-13-05-04-58	2020-08-05-05-35-16	6	2	15	Detection relocated
2020	4	13	7	41	27.07	38.0066	22.9634	7.33	n/a	2	2020-04-13-07-41-27	2020-05-09-05-42-20	6	1	84	Detection relocated
2020	4	13	8	26	23.61	38.0498	22.9344	7.81	n/a	2	2020-04-13-08-26-23	2020-08-05-05-35-16	6	2	15	Detection relocated
2020	4	13	12	39	37.01	38.0359	22.958	6.57	1.3	2	2020-04-13-12-39-37	2020-04-13-13-58-38	6	1	84	Detection relocated
2020	4	13	13	58	36.67	38.0374	22.9603	6.56	1.8	1	2020-04-13-13-58-38	2020-04-13-13-58-38	6	1	84	Template reloc
2020	4	13	16	47	23.95	38.05	22.9045	11.32	0.2	2	2020-04-13-16-47-23	2020-04-28-02-43-29	55	2	48	Detection relocated
2020	4	14	4	38	23.01	38.0298	22.9808	6.68	3.2	1	2020-04-14-04-38-24	2020-04-14-04-38-24	6	1	79	Template reloc
2020	4	14	4	53	28.114	38.0342	22.964	6.29	1.6	1	2020-04-14-04-53-28	2020-04-14-04-53-28	6	1	79	Template reloc
2020	4	14	5	24	46.46	38.0586	22.9302	8.25	n/a	2	2020-04-14-05-24-46	2020-08-05-05-35-16	6	2	15	Detection relocated
2020	4	14	8	27	21.37	38.0084	22.9637	5.51	0.1	2	2020-04-14-08-27-21	2020-04-21-03-28-13	6	1	79	Detection relocated
2020	4	14	8	29	17	38.0409	22.9822	5.94	2.2	2	2020-04-14-08-29-17	2020-04-09-20-45-49	6	1	94	Detection relocated
2020	4	14	8	41	59.97	38.0374	22.997	5.59	0.1	2	2020-04-14-08-41-59	2020-04-09-20-45-49	6	1	94	Detection relocated
2020	4	14	11	18	15.58	38.001	22.9668	5.77	n/a	2	2020-04-14-11-18-15	2020-04-21-03-28-13	6	1	79	Detection relocated
2020	4	14	14	47	45.39	38.0899	22.8337	10.93	1.5	2	2020-04-14-14-47-45	2021-01-20-10-41-41	3	4	5	Detection relocated
2020	4	14	23	10	2.7	38.0429	22.9577	6.23	n/a	2	2020-04-14-23-10-02	2020-04-04-01-45-18	6	1	79	Detection relocated
2020	4	15	19	15	43.92	38.0396	22.9477	6.24	n/a	2	2020-04-15-19-15-43	2020-04-04-01-45-18	6	1	79	Detection relocated
2020	4	16	3	36	10.67	38.008	22.9687	5.53	0	2	2020-04-16-03-36-10	2020-04-21-03-28-13	6	1	79	Detection relocated
2020	4	16	5	21	6.987	38.2429	22.7226	19.26	1.8	1	2020-04-16-05-20-49	2020-04-16-05-20-49	12	7	21	Template reloc
2020	4	16	14	58	44.33	38.0668	22.9399	6.49	0.3	2	2020-04-16-14-58-44	2020-05-15-15-41-15	6	2	51	Detection relocated
2020	4	16	15	5	1.13	38.0085	22.9625	5.51	0.4	2	2020-04-16-15-05-01	2020-04-21-03-28-13	6	1	79	Detection relocated
2020	4	16	18	6	15.04	38.043	22.9849	6.08	0	2	2020-04-16-18-06-15	2020-04-04-01-45-18	6	1	79	Detection relocated
2020	4	16	18	55	8.98	38.0147	22.9834	5.37	-0.3	2	2020-04-16-18-55-08	2020-04-21-03-28-13	6	1	79	Detection relocated
2020	4	16	19	54	54	38.1476	22.9806	6.01	n/a	2	2020-04-16-19-54-53	2020-03-07-08-20-11	6	2	18	Detection relocated
2020	4	16	21	10	35.36	38.0082	22.971	5.52	-0.3	2	2020-04-16-21-10-35	2020-04-21-03-28-13	6	1	79	Detection relocated
2020	4	16	23	30	58.44	38.0583	22.9318	7.29	n/a	2	2020-04-16-23-30-58	2020-07-08-12-31-35	6	2	51	Detection relocated
2020	4	17	0	45	27.65	38.0507	22.9052	11.34	0	2	2020-04-17-00-45-27	2020-04-28-02-43-29	55	2	48	Detection relocated
2020	4	17	1	17	5.79	38.0251	22.8953	14.72	-0.2	2	2020-04-17-01-17-05	2020-07-22-18-54-09	71	3	96	Detection relocated
2020	4	17	2	26	55.66	38.0282	22.961	8.07	n/a	2	2020-04-17-02-26-55	2020-03-20-01-36-14	6	1	79	Detection relocated
2020	4	17	2	27	59.22	38.1298	22.6109	11.57	0.7	2	2020-04-17-02-27-59	2020-04-17-17-17-44	72	9	97	Detection relocated
2020	4	17	2	35	13.758	38.1308	22.7053	11.97	1.5	1	2020-04-17-02-35-14	2020-04-17-02-35-14	73	8	98	Template reloc
2020	4	17	3	1	28.35	38.0649	22.8284	11.78	-0.1	2	2020-04-17-03-01-28	2020-04-27-00-02-17	44	3	67	Detection relocated
2020	4	17	7	46	44.24	38.0594	22.9177	11.36	-0.2	2	2020-04-17-07-46-44	2020-04-28-02-43-29	55	2	48	Detection relocated
2020	4	17	9	44	6.75	38.0508	22.9049	11.34	-0.2	2	2020-04-17-09-44-06	2020-04-28-02-43-29	55	2	48	Detection relocated
2020	4	17	11	10	56.26	38.0125	22.9835	5.41	n/a	2	2020-04-17-11-10-56	2020-04-21-03-28-13	6	1	79	Detection relocated
2020	4	17	15	45	34.95	38.0322	23.0027	3.76	0.4	2	2020-04-17-15-45-34	2020-04-24-18-58-43	6	1	99	Detection relocated
2020	4	17	15	59	18.85	38.0486	22.9534	6.47	n/a	2	2020-04-17-15-59-18	2020-04-04-01-45-18	6	1	79	Detection relocated
2020	4	17	16	46	46.69	38.1298	22.6113	11.54	0.9	2	2020-04-17-16-46-46	2020-04-17-17-17-44	72	9	97	Detection relocated
2020	4	17	17	2	18.86	38.1307	22.6104	11.46	0.3	2	2020-04-17-17-02-18	2020-04-17-17-17-44	72	9	97	Detection relocated
2020	4	17	17	12	59.64	38.1302	22.6107	11.51	0.1	2	2020-04-17-17-12-59	2020-04-17-17-17-44	72	9	97	Detection relocated
2020	4	17	17	17	43.641	38.1299	22.6108	11.59	1.9	1	2020-04-17-17-17-44	2020-04-17-17-17-44	72	9	97	Template reloc
2020	4	17	18	22	4.96	38.015	22.9591	6.75	-0.7	2	2020-04-17-18-22-04	2020-04-03-09-36-54	6	1	79	Detection relocated
2020	4	17	20	5	33	38.1417	22.6096	11.67	0.2	2	2020-04-17-20-05-33	2020-04-17-23-01-55	72	9	97	Detection relocated
2020	4	17	21	54	48.36	38.1171	22.6186	12.69	0.5	2	2020-04-17-21-54-48	2020-04-17-22-59-58	72	9	97	Detection relocated
2020	4	17	22	1	13.34	38.1297	22.6113	11.6	1.2	2	2020-04-17-22-01-13	2020-04-17-17-17-44	72	9	97	Detection relocated
2020	4	17	22	21	21.32	38.1188	22.6176	12.52	0.1	2	2020-04-17-22-21-21	2020-04-17-22-59-58	72	9	97	Detection relocated
2020	4	17	22	39	57.8	38.1297	22.6106	11.6	0.6	2	2020-04-17-22-39-57	2020-04-17-17-17-44	72	9	97	Detection relocated
2020	4	17	22	59	58.223	38.1153	22.6177	12.55	0.9	1	2020-04-17-22-59-58	2020-04-17-22-59-58	72	9	97	Template reloc
2020	4	17	23	1	55.201	38.1411	22.613	11.82	1.3	1	2020-04-17-23-01-55	2020-04-17-23-01-55	72	9	97	Template reloc
2020	4	17	23	24	42.76	38.0582	22.917	11.34	0.1	2	2020-04-17-23-24-42	2020-04-28-02-43-29	55	2	48	Detection relocated
2020	4	17	23	36	0.419998	38.0654	22.9323	11.4	-0.4	2	2020-04-17-23-36-00	2020-04-28-02-43-29	55	2	48	Detection relocated
2020	4	18	0	17	4.88	38.1273	22.6126	12.17	0.1	2	2020-04-18-00-17-04	2020-04-17-17-17-44	72	9	97	Detection relocated
2020	4	18	0	39	35.963	38.1397	22.6125	10.6	1.6	1	2020-04-18-00-39-37	2020-04-18-00-39-37	74	9	100	Template reloc
2020	4	18	1	5	25.26	38.0372	22.9964	5.61	0.3	2	2020-04-18-01-05-25	2020-04-09-20-45-49	6	1	94	Detection relocated
2020	4	18	1	39	23.82	38.1349	22.6029	9.91	0.2	2	2020-04-18-01-39-23	2020-04-17-17-17-44	72	9	97	Detection relocated
2020	4	18	2	3	16.81	38.13	22.6108	11.56	0.1	2	2020-04-18-02-03-16	2020-04-17-17-17-44	72	9	97	Detection relocated
2020	4	18	2	12	24.37	38.1298	22.6109	11.59	1	2	2020-04-18-02-12-24	2020-04-17-17-17-44	72	9	97	Detection relocated
2020	4	18	2	55	6.41	38.1298	22.611	11.6	0.9	2	2020-04-18-02-55-06	2020-04-17-17-17-44	72	9	97	Detection relocated
2020	4	18	4	19	2.95	38.0078	22.9621	5.53	0.8	2	2020-04-18-04-19-02	2020-04-21-03-28-13	6	1	79	Detection relocated
2020	4	18	4	22	32.01	38.1344	22.6067	10.18	0.5	2	2020-04-18-04-22-31	2020-04-17-17-17-44	72	9	97	Detection relocated
2020	4	18	10	15	36.76	38.1719	22.5814	18.4	n/a	2	2020-04-18-10-15-36	2020-04-18-13-25-34	75	9	101	Detection relocated
2020	4	18	12	2	35.37	38.1878	22.5777	13.08	0.9	2	2020-04-18-12-02-35	2020-05-13-00-10-42	75	10	101	Detection relocated
2020	4	18	12	30	32.71	38.1877	22.5747	13.18	n/a	2	2020-04-18-12-30-32	2020-05-13-00-10-42	75	10	101	Detection relocated
2020	4	18	12	31	3.6	38.188	22.5781	13.14	1.3	2	2020-04-18-12-31-03	2020-05-13-00-10-42	75	10	101	Detection relocated
2020	4	18	12	56	2.62	38.0593	22.9191	11.25	n/a	2	2020-04-18-12-56-02	2020-04-28-02-43-29	55	2	48	Detection relocated
2020	4	18	13	3	52.91	38.0084	22.9626	5.52	-0.3	2	2020-04-18-13-03-52	2020-04-21-03-28-13	6	1	79	Detection relocated
2020	4	18	13	24	36.42	38.1715	22.5817	18.27	0.5	2	2020-04-18-13-24-36	2020-04-18-13-25-34	75	9	101	Detection relocated
2020	4	18	13	25	34.42	38.1716	22.5811	18.35	1.2	1	2020-04-18-13-25-34	2020-04-18-13-25-34	75	9	101	Template reloc
2020	4	18	13	26	51.62	38.1713	22.5817	18.29	0.4	2	2020-04-18-13-26-51	2020-04-18-13-25-34	75	9	101	Detection relocated
2020	4	18	14	4	24.96	38.0293	22.971	6.85	n/a	2	2020-04-18-14-04-24	2020-05-09-05-42-20	6	1	84	Detection relocated
2020	4	18	14	17	24.565	38.111	22.7066	15.96	1.2	1	2020-04-18-14-17-27	2020-04-18-14-17-27	76	8	102	Template reloc
2020	4	18	15	32	37.39	38.0174	22.9521	8.76	0.2	2	2020-04-18-15-32-37	2020-07-01-10-27-57	6	1	71	Detection relocated
2020	4	18	15	37	47.03	38.172	22.5825	18.32	n/a	2	2020-04-18-15-37-47	2020-04-18-13-25-34	75	9	101	Detection relocated
2020	4	18	16	11	19.71	38.0707	22.9274	7.81	0.3	2	2020-04-18-16-11-19	2020-05-21-17-47-41	6	2	47	Detection relocated
2020	4	18	16	19	58.26	38.0111	22.98	5.44	-0.2	2	2020-04-18-16-19-58	2020-04-21-03-28-13	6	1	79	Detection relocated
2020	4	18	19	42	51.44	38.0074	22.9617	5.55	0.8	2	2020-04-18-19-42-51	2020-04-21-03-28-13	6	1	79	Detection relocated
2020	4	18	20	35	35.18	38.0174	22.9862	5.34	-0.5	2	2020-04-18-20-35-35	2020-04-21-03-28-13	6	1	79	Detection relocated
2020	4	18	21	2	5.94	38.06	22.9339	7.19	n/a	2	2020-04-18-21-02-05	2020-07-08-12-31-35	6	2	51	Detection relocated
2020	4	18	21	20	43.68	38.1881	22.5786	13.08	0.8	2	2020-04-18-21-20-43	2020-05-13-00-10-42	75	10	101	Detection relocated
2020	4	18	21	24	36.6	38.1298	22.6101	11.6	0.4	2	2020-04-18-21-24-36	2020-04-17-17-17-44	72	9	97	Detection relocated
2020	4	18	21	52	31.72	38.0406	23.0061	3.22	0.4	2	2020-04-18-21-52-31	2020-04-24-18-58-43	6	1	99	Detection relocated
2020	4	18	23	21	31.7	38.1985	22.7473	3.47	n/a	2	2020-04-18-23-21-31	2021-04-21-15-25-19	36	6	57	Detection relocated
2020	4	19	2	0	16.73	38.2546	22.7169	14.71	1.1	2	2020-04-19-02-00-16	2020-02-18-04-30-41	12	7	21	Detection relocated
2020	4	19	2	34	58	38.0317	22.991	5.88	0	2	2020-04-19-02-34-58	2020-04-21-15-58-52	6	1	99	Detection relocated
2020	4	19	2	58	10.58	38.0426	22.9531	6.23	-0.1	2	2020-04-19-02-58-10	2020-04-04-01-45-18	6	1	79	Detection relocated
2020	4	19	3	21	4.08	38.0177	22.9782	6.19	-0.1	2	2020-04-19-03-21-04	2020-04-21-15-58-52	6	1	99	Detection relocated
2020	4	19	3	36	43.95	38.1934	22.741	15.31	n/a	2	2020-04-19-03-36-43	2021-04-28-20-41-51	36	6	62	Detection relocated
2020	4	19	4	53	27.33	38.2153	22.6193	5.51	0.7	2	2020-04-19-04-53-27	2020-03-23-21-40-26	28	10	43	Detection relocated
2020	4	19	5	12	43.34	38.2521	22.7207	16.67	n/a	2	2020-04-19-05-12-43	2020-02-24-12-57-48	12	7	21	Detection relocated
2020	4	19	5	36	31.32	38.0225	22.9772	6.26	0.6	2	2020-04-19-05-36-31	2020-04-21-15-58-52	6	1	99	Detection relocated
2020	4	19	5	46	28.63	38.0429	23.0045	3.27	n/a	2	2020-04-19-05-46-28	2020-04-24-18-58-43	6	1	99	Detection relocated
2020	4	19	6	57	27.43	38.0439	23.0059	2.99	n/a	2	2020-04-19-06-57-27	2020-04-24-18-58-43	6	1	99	Detection relocated
2020	4	19	7	2	4.97	38.0194	22.9772	6.2	0.9	2	2020-04-19-07-02-04	2020-04-21-15-58-52	6	1	99	Detection relocated
2020	4	19	7	11	37.82	38.0421	23.0061	3.27	0.3	2	2020-04-19-07-11-37	2020-04-24-18-58-43	6	1	99	Detection relocated
2020	4	19	9	19	36.84	38.0417	22.9518	6.24	0.2	2	2020-04-19-09-19-36	2020-04-04-01-45-18	6	1	79	Detection relocated
2020	4	19	12	23	24.24	38.0404	22.9723	6.46	n/a	2	2020-04-19-12-23-24	2020-04-13-13-58-38	6	1	84	Detection relocated
2020	4	19	13	3	45.78	38.0303	22.9845	6.07	n/a	2	2020-04-19-13-03-45	2020-04-21-15-58-52	6	1	99	Detection relocated
2020	4	19	13	58	44.89	38.0114	22.9785	5.43	0.3	2	2020-04-19-13-58-44	2020-04-21-03-28-13	6	1	79	Detection relocated
2020	4	19	14	7	51.87	38.0352	22.9597	6.67	n/a	2	2020-04-19-14-07-51	2020-04-03-09-36-54	6	1	79	Detection relocated
2020	4	19	14	57	9.86	38.0618	22.923	11.35	-0.2	2	2020-04-19-14-57-09	2020-04-28-02-43-29	55	2	48	Detection relocated
2020	4	19	17	29	48.38	38.0369	23.0015	5.4	n/a	2	2020-04-19-17-29-48	2020-04-23-06-19-30	77	1	103	Detection relocated
2020	4	19	19	54	56.32	38.0255	22.9734	6.27	0.8	2	2020-04-19-19-54-56	2020-04-21-15-58-52	6	1	99	Detection relocated
2020	4	19	21	26	13.84	38.2151	22.6181	5.51	n/a	2	2020-04-19-21-26-13	2020-03-23-21-40-26	28	10	43	Detection relocated
2020	4	19	22	11	26.84	38.0314	22.9887	5.99	-0.3	2	2020-04-19-22-11-26	2020-04-21-15-58-52	6	1	99	Detection relocated
2020	4	19	22	55	2.08	38.0327	22.9933	5.83	0	2	2020-04-19-22-55-02	2020-04-21-15-58-52	6	1	99	Detection relocated
2020	4	19	22	58	49.08	38.0553	22.905	11.45	0.3	2	2020-04-19-22-58-49	2020-04-28-02-43-29	55	2	48	Detection relocated
2020	4	20	1	18	12.99	38.1693	22.7082	11.21	0.8	2	2020-04-20-01-18-12	2021-04-25-08-49-00	78	6	104	Detection relocated
2020	4	20	5	32	13.4	38.0299	22.9745	5.53	1.4	2	2020-04-20-05-32-13	2020-04-26-20-24-30	79	1	105	Detection relocated
2020	4	20	6	25	52.739	38.0834	22.9578	4.66	1.1	1	2020-04-20-06-25-53	2020-04-20-06-25-53	80	1	106	Template reloc
2020	4	20	8	10	39.6	38.1912	22.541	7.64	0.5	2	2020-04-20-08-10-39	2020-04-20-16-36-32	81	10	107	Detection relocated
2020	4	20	9	40	27.69	38.0469	22.8568	8.48	1.7	2	2020-04-20-09-40-27	2020-07-18-11-28-32	82	3	108	Detection relocated
2020	4	20	10	17	20.04	38.018	22.9193	5.92	n/a	2	2020-04-20-10-17-19	2020-05-19-07-37-09	48	1	109	Detection relocated
2020	4	20	11	41	52.01	38.0171	22.9781	6.23	0.6	2	2020-04-20-11-41-52	2020-04-21-15-58-52	6	1	99	Detection relocated
2020	4	20	12	58	52.52	38.0343	23.0031	3.65	0	2	2020-04-20-12-58-52	2020-04-24-18-58-43	6	1	99	Detection relocated
2020	4	20	13	55	47.92	38.0338	22.993	5.77	0.5	2	2020-04-20-13-55-47	2020-04-21-15-58-52	6	1	99	Detection relocated
2020	4	20	14	3	13.31	38.1901	22.5383	6.63	0.8	2	2020-04-20-14-03-13	2020-04-20-16-36-32	81	10	107	Detection relocated
2020	4	20	15	24	1.33	38.0193	23.0025	3.89	0.6	2	2020-04-20-15-24-01	2020-04-24-18-58-43	6	1	99	Detection relocated
2020	4	20	15	46	4.27	38.191	22.5412	6.98	0.4	2	2020-04-20-15-46-04	2020-04-20-16-36-32	81	10	107	Detection relocated
2020	4	20	16	12	56.96	38.0319	23.0018	3.82	0	2	2020-04-20-16-12-56	2020-04-24-18-58-43	6	1	99	Detection relocated
2020	4	20	16	27	57.27	38.037	22.9323	5.69	n/a	2	2020-04-20-16-27-57	2020-05-15-23-58-16	48	1	105	Detection relocated
2020	4	20	16	30	47.76	38.0741	22.9086	5.43	0.1	2	2020-04-20-16-30-47	2020-05-23-02-13-42	6	2	63	Detection relocated
2020	4	20	16	36	32.21	38.1899	22.5415	7.63	1.3	1	2020-04-20-16-36-32	2020-04-20-16-36-32	81	10	107	Template reloc
2020	4	20	16	38	48.05	38.191	22.5405	6.77	1.2	2	2020-04-20-16-38-48	2020-04-20-16-36-32	81	10	107	Detection relocated
2020	4	20	16	56	38.23	38.0309	22.9584	4.59	1.2	2	2020-04-20-16-56-38	2020-04-27-04-53-51	6	1	110	Detection relocated
2020	4	20	17	2	7.56	38.1876	22.5771	12.72	0.5	2	2020-04-20-17-02-07	2020-11-16-19-57-11	83	10	111	Detection relocated
2020	4	20	17	47	32.46	38.1908	22.5406	6.78	0.6	2	2020-04-20-17-47-32	2020-04-20-16-36-32	81	10	107	Detection relocated
2020	4	20	19	10	20.66	38.0197	22.9795	6.18	-0.3	2	2020-04-20-19-10-20	2020-04-21-15-58-52	6	1	99	Detection relocated
2020	4	20	19	37	46.56	38.033	22.9889	5.94	-0.3	2	2020-04-20-19-37-46	2020-04-21-15-58-52	6	1	99	Detection relocated
2020	4	20	21	2	50.2	38.0797	22.921	4.98	-0.3	2	2020-04-20-21-02-50	2020-05-23-02-13-42	6	2	63	Detection relocated
2020	4	20	21	28	54.58	38.1186	22.7051	13.15	0.7	2	2020-04-20-21-28-54	2021-02-12-06-41-44	84	8	112	Detection relocated
2020	4	20	21	54	33.18	38.0029	22.9968	3.82	0.4	2	2020-04-20-21-54-33	2020-04-24-18-58-43	6	1	99	Detection relocated
2020	4	20	22	0	38.96	38.0173	22.9786	6.23	0.7	2	2020-04-20-22-00-38	2020-04-21-15-58-52	6	1	99	Detection relocated
2020	4	20	22	3	17.84	38.0294	22.9249	7.06	n/a	2	2020-04-20-22-03-17	2020-05-12-14-58-08	6	2	54	Detection relocated
2020	4	20	22	8	53.16	38.0383	22.9665	6.13	n/a	2	2020-04-20-22-08-53	2020-04-04-01-45-18	6	1	79	Detection relocated
2020	4	20	22	40	4.24	38.0366	23.0031	3.73	-0.5	2	2020-04-20-22-40-04	2020-04-24-18-58-43	6	1	99	Detection relocated
2020	4	20	23	26	36.38	38.0049	22.9966	3.91	0.3	2	2020-04-20-23-26-36	2020-04-24-18-58-43	6	1	99	Detection relocated
2020	4	21	1	12	48.1	38.0418	22.9776	6.09	n/a	2	2020-04-21-01-12-48	2020-04-05-02-42-13	6	1	79	Detection relocated
2020	4	21	2	17	16.38	38.2824	22.7324	4.18	1	2	2020-04-21-02-17-16	2020-04-21-23-59-35	85	7	113	Detection relocated
2020	4	21	3	28	12.243	38.0085	22.9701	5.51	1.6	1	2020-04-21-03-28-13	2020-04-21-03-28-13	6	1	79	Template reloc
2020	4	21	6	5	32.1	38.032	22.9471	6.57	1.2	2	2020-04-21-06-05-32	2020-04-13-13-58-38	6	1	84	Detection relocated
2020	4	21	6	23	57.72	38.041	22.926	5.88	n/a	2	2020-04-21-06-23-57	2020-05-19-07-37-09	48	1	109	Detection relocated
2020	4	21	9	56	7.64	38.0447	23.0066	3.03	0.6	2	2020-04-21-09-56-07	2020-04-24-18-58-43	6	1	99	Detection relocated
2020	4	21	10	15	44.32	38.0187	23.0025	3.86	0.3	2	2020-04-21-10-15-44	2020-04-24-18-58-43	6	1	99	Detection relocated
2020	4	21	10	39	14.67	38.0443	22.9674	6.2	0	2	2020-04-21-10-39-14	2020-04-04-01-45-18	6	1	79	Detection relocated
2020	4	21	11	32	47.18	37.9859	22.9905	3.21	-0.1	2	2020-04-21-11-32-47	2020-04-24-18-58-43	6	1	99	Detection relocated
2020	4	21	11	54	18.5	38.0321	22.9858	6.03	n/a	2	2020-04-21-11-54-18	2020-04-21-15-58-52	6	1	99	Detection relocated
2020	4	21	12	22	24.98	38.0285	22.9823	6.09	n/a	2	2020-04-21-12-22-24	2020-04-21-15-58-52	6	1	99	Detection relocated
2020	4	21	15	34	13.4	38.0185	22.977	6.22	0.4	2	2020-04-21-15-34-13	2020-04-21-15-58-52	6	1	99	Detection relocated
2020	4	21	15	56	48.13	38.0171	22.9673	6.75	n/a	2	2020-04-21-15-56-48	2020-04-03-09-15-41	6	1	79	Detection relocated
2020	4	21	15	58	50.625	38.0294	22.9829	6.1	1.9	1	2020-04-21-15-58-52	2020-04-21-15-58-52	6	1	99	Template reloc
2020	4	21	16	9	23.12	38.0369	23.0039	3.5	0.1	2	2020-04-21-16-09-23	2020-04-24-18-58-43	6	1	99	Detection relocated
2020	4	21	16	59	17.69	38.03	22.9878	5.62	0.8	2	2020-04-21-16-59-17	2020-04-22-20-36-31	86	1	114	Detection relocated
2020	4	21	17	4	46.8	38.04	23.0035	3.58	n/a	2	2020-04-21-17-04-46	2020-04-24-18-58-43	6	1	99	Detection relocated
2020	4	21	17	5	18.12	38.0505	23.0075	2.17	n/a	2	2020-04-21-17-05-18	2020-04-24-18-58-43	6	1	99	Detection relocated
2020	4	21	20	1	46.72	38.041	22.951	6.26	0.9	2	2020-04-21-20-01-46	2020-04-04-01-45-18	6	1	79	Detection relocated
2020	4	21	21	7	13.08	38.033	23.003	3.7	0.4	2	2020-04-21-21-07-13	2020-04-24-18-58-43	6	1	99	Detection relocated
2020	4	21	21	33	25.6	38.0427	22.9555	6.23	n/a	2	2020-04-21-21-33-25	2020-04-04-01-45-18	6	1	79	Detection relocated
2020	4	21	21	47	44.668	38.0127	22.9802	5.38	1.9	1	2020-04-21-21-47-45	2020-04-21-21-47-45	87	1	63	Template reloc
2020	4	21	22	14	57.7	38.0354	22.982	6.06	0.9	2	2020-04-21-22-14-57	2020-04-23-06-19-30	77	1	103	Detection relocated
2020	4	21	23	59	34.424	38.2826	22.7324	4.15	2.5	1	2020-04-21-23-59-35	2020-04-21-23-59-35	85	7	113	Template reloc
2020	4	22	0	34	26.71	38.0125	22.9803	5.38	1.6	2	2020-04-22-00-34-26	2020-04-21-21-47-45	87	1	63	Detection relocated
2020	4	22	3	42	48.76	38.0052	22.9971	4.37	1.3	2	2020-04-22-03-42-48	2020-04-24-18-58-43	6	1	99	Detection relocated
2020	4	22	4	39	25.407	38.0115	22.9747	22.4	2	1	2020-04-22-04-39-24	2020-04-22-04-39-24	88	0	115	Template loc
2020	4	22	4	51	34.2	38.0488	22.9437	8.11	n/a	2	2020-04-22-04-51-34	2020-07-06-19-54-03	6	1	9	Detection relocated
2020	4	22	6	17	3.32	38.0539	22.9648	6.62	1.1	2	2020-04-22-06-17-03	2020-04-04-01-45-18	6	1	79	Detection relocated
2020	4	22	6	17	53.43	38.0134	23.003	3.91	0.2	2	2020-04-22-06-17-53	2020-04-24-18-58-43	6	1	99	Detection relocated
2020	4	22	7	21	44.44	38.0295	22.9568	6.78	n/a	2	2020-04-22-07-21-44	2020-04-03-09-36-54	6	1	79	Detection relocated
2020	4	22	9	14	8.9	38.1757	22.7048	6.07	1	2	2020-04-22-09-14-08	2020-09-07-02-50-31	58	6	83	Detection relocated
2020	4	22	10	8	33.48	38.2826	22.732	4.16	1.3	2	2020-04-22-10-08-33	2020-04-21-23-59-35	85	7	113	Detection relocated
2020	4	22	10	21	45.45	38.0294	22.9872	5.64	1	2	2020-04-22-10-21-45	2020-04-22-20-36-31	86	1	114	Detection relocated
2020	4	22	11	24	57.85	38.0423	22.9487	3.89	n/a	2	2020-04-22-11-24-57	2020-07-10-19-56-41	6	1	110	Detection relocated
2020	4	22	13	56	20.82	38.2826	22.733	4.15	1.1	2	2020-04-22-13-56-20	2020-04-21-23-59-35	85	7	113	Detection relocated
2020	4	22	16	15	5.39	38.03	22.9878	5.62	n/a	2	2020-04-22-16-15-05	2020-04-22-20-36-31	86	1	114	Detection relocated
2020	4	22	16	15	36.57	38.0294	22.9872	5.64	n/a	2	2020-04-22-16-15-36	2020-04-22-20-36-31	86	1	114	Detection relocated
2020	4	22	16	22	29.19	38.0369	22.9882	5.89	0	2	2020-04-22-16-22-29	2020-04-23-06-19-30	77	1	103	Detection relocated
2020	4	22	16	28	57.85	38.0371	23.0058	5.12	0.1	2	2020-04-22-16-28-57	2020-04-23-06-19-30	77	1	103	Detection relocated
2020	4	22	17	27	53.02	38.0326	22.9944	5.76	0	2	2020-04-22-17-27-53	2020-04-21-15-58-52	6	1	99	Detection relocated
2020	4	22	20	36	30.306	38.0297	22.9875	5.63	1.9	1	2020-04-22-20-36-31	2020-04-22-20-36-31	86	1	114	Template reloc
2020	4	22	20	45	45.56	38.017	22.9781	6.19	0.8	2	2020-04-22-20-45-45	2020-04-21-15-58-52	6	1	99	Detection relocated
2020	4	22	23	18	4.48	38.03	22.9878	5.62	n/a	2	2020-04-22-23-18-04	2020-04-22-20-36-31	86	1	114	Detection relocated
2020	4	23	0	34	27.23	38.0121	22.9796	5.39	1.3	2	2020-04-23-00-34-27	2020-04-21-21-47-45	87	1	63	Detection relocated
2020	4	23	1	0	56.95	38.0173	22.9497	4.52	0.8	2	2020-04-23-01-00-56	2020-04-27-04-53-51	6	1	110	Detection relocated
2020	4	23	1	13	1.26	38.0428	22.9544	6.25	1.1	2	2020-04-23-01-13-01	2020-04-04-01-45-18	6	1	79	Detection relocated
2020	4	23	4	17	19.11	38.0132	23.002	3.82	-0.3	2	2020-04-23-04-17-19	2020-04-24-18-58-43	6	1	99	Detection relocated
2020	4	23	6	14	58.86	38.0391	22.9988	3.96	3	1	2020-04-23-06-14-59	2020-04-23-06-14-59	77	1	103	Template reloc
2020	4	23	6	19	28.91	38.0365	22.9858	5.97	2.3	1	2020-04-23-06-19-30	2020-04-23-06-19-30	77	1	103	Template reloc
2020	4	23	6	26	15.02	38.0478	22.9505	8.94	n/a	2	2020-04-23-06-26-15	2020-06-23-13-02-23	6	1	9	Detection relocated
2020	4	23	6	37	15.87	38.0431	22.9585	6.23	-0.1	2	2020-04-23-06-37-15	2020-04-04-01-45-18	6	1	79	Detection relocated
2020	4	23	6	51	7.87	38.0362	22.9842	6.01	1.2	2	2020-04-23-06-51-07	2020-04-23-06-19-30	77	1	103	Detection relocated
2020	4	23	7	13	31.33	38.13	22.6108	11.56	0.7	2	2020-04-23-07-13-31	2020-04-17-17-17-44	72	9	97	Detection relocated
2020	4	23	7	38	37.68	38.0362	22.9873	5.9	n/a	2	2020-04-23-07-38-37	2020-04-23-06-19-30	77	1	103	Detection relocated
2020	4	23	8	16	3.95	38.0338	23.0008	6.71	1.8	2	2020-04-23-08-16-04	2020-04-25-12-03-08	89	1	114	Detection relocated
2020	4	23	8	40	43.85	38.0438	22.9688	6.14	n/a	2	2020-04-23-08-40-43	2020-04-04-01-45-18	6	1	79	Detection relocated
2020	4	23	8	55	27.19	38.0363	22.9818	6.06	0.5	2	2020-04-23-08-55-27	2020-04-23-06-19-30	77	1	103	Detection relocated
2020	4	23	12	16	42.22	38.0164	22.9971	5.35	0.1	2	2020-04-23-12-16-42	2020-04-25-18-45-56	77	1	103	Detection relocated
2020	4	23	12	17	13.82	38.2826	22.7323	4.17	1.1	2	2020-04-23-12-17-13	2020-04-21-23-59-35	85	7	113	Detection relocated
2020	4	23	15	0	15.49	38.1296	22.6106	11.61	1.3	2	2020-04-23-15-00-15	2020-04-17-17-17-44	72	9	97	Detection relocated
2020	4	23	18	9	12.72	38.044	22.9646	6.23	0.2	2	2020-04-23-18-09-12	2020-04-04-01-45-18	6	1	79	Detection relocated
2020	4	23	18	19	56.44	38.0161	22.9494	4.48	1.5	2	2020-04-23-18-19-56	2020-04-27-04-53-51	6	1	110	Detection relocated
2020	4	23	19	59	8.02	38.0117	22.9818	5.42	0.6	2	2020-04-23-19-59-08	2020-04-21-03-28-13	6	1	79	Detection relocated
2020	4	23	21	9	51.8	38.0139	22.9963	5.35	0.5	2	2020-04-23-21-09-51	2020-04-25-18-45-56	77	1	103	Detection relocated
2020	4	23	21	32	59.54	38.0354	22.9596	6.32	1.1	2	2020-04-23-21-32-59	2020-04-14-04-53-28	6	1	79	Detection relocated
2020	4	23	23	21	29	38.1103	22.7008	9.73	1	2	2020-04-23-23-21-29	2020-04-30-20-20-17	90	8	116	Detection relocated
2020	4	24	1	45	35.69	38.1847	22.7319	14.84	1.4	2	2020-04-24-01-45-35	2021-03-25-02-51-47	36	6	117	Detection relocated
2020	4	24	3	15	33.706	38.1753	22.5443	12.16	1.1	1	2020-04-24-03-15-25	2020-04-24-03-15-25	91	10	118	Template reloc
2020	4	24	3	44	54.88	38.0361	22.9538	6.65	n/a	2	2020-04-24-03-44-54	2020-04-27-04-53-51	6	1	110	Detection relocated
2020	4	24	5	36	16.96	38.0305	22.9871	6.01	0.2	2	2020-04-24-05-36-16	2020-04-21-15-58-52	6	1	99	Detection relocated
2020	4	24	7	43	19.98	38.038	22.9788	4.2	0.1	2	2020-04-24-07-43-19	2020-04-27-04-53-51	6	1	110	Detection relocated
2020	4	24	9	29	49.77	38.0601	22.9221	7.07	n/a	2	2020-04-24-09-29-49	2020-05-15-15-41-15	6	2	51	Detection relocated
2020	4	24	11	20	22.93	38.0362	22.9794	6.09	0.4	2	2020-04-24-11-20-22	2020-04-23-06-19-30	77	1	103	Detection relocated
2020	4	24	11	22	26.42	38.023	22.9973	5.35	1.3	2	2020-04-24-11-22-26	2020-04-25-18-45-56	77	1	103	Detection relocated
2020	4	24	11	43	8.8	38.1568	22.6189	12.69	1.2	2	2020-04-24-11-43-08	2020-04-27-08-42-18	92	9	119	Detection relocated
2020	4	24	13	31	17.51	38.0372	23	5.47	0.2	2	2020-04-24-13-31-17	2020-04-23-06-19-30	77	1	103	Detection relocated
2020	4	24	13	44	33.97	38.0053	22.9979	3.98	n/a	2	2020-04-24-13-44-34	2020-04-24-18-58-43	6	1	99	Detection relocated
2020	4	24	13	46	59.22	38.0386	22.9742	6.53	0.4	2	2020-04-24-13-46-59	2020-04-13-13-58-38	6	1	84	Detection relocated
2020	4	24	18	53	58.24	38.0051	22.9986	3.94	0.3	2	2020-04-24-18-53-58	2020-04-24-18-58-43	6	1	99	Detection relocated
2020	4	24	18	58	42.991	38.024	23.001	3.76	1.6	1	2020-04-24-18-58-43	2020-04-24-18-58-43	6	1	99	Template reloc
2020	4	24	19	52	28.12	38.0439	22.9679	6.24	n/a	2	2020-04-24-19-52-28	2020-04-04-01-45-18	6	1	79	Detection relocated
2020	4	24	21	3	36.3	38.0072	22.9975	3.97	0.6	2	2020-04-24-21-03-36	2020-04-24-18-58-43	6	1	99	Detection relocated
2020	4	24	21	7	49.6	38.0383	23.007	3.55	0.1	2	2020-04-24-21-07-49	2020-04-24-18-58-43	6	1	99	Detection relocated
2020	4	24	22	13	17.82	38.0263	22.9925	7.07	1.3	1	2020-04-24-22-13-17	2020-04-24-22-13-17	88	1	120	Template reloc
2020	4	24	22	37	2.92	38.1485	22.6139	16.55	0.3	2	2020-04-24-22-37-02	2020-04-27-08-42-18	92	9	119	Detection relocated
2020	4	24	23	16	0.120003	38.1568	22.6183	12.68	0.4	2	2020-04-24-23-16-00	2020-04-27-08-42-18	92	9	119	Detection relocated
2020	4	24	23	37	26.36	38.0517	22.9063	11.33	0.3	2	2020-04-24-23-37-26	2020-04-28-02-43-29	55	2	48	Detection relocated
2020	4	25	0	44	20.655	38.0037	22.9487	10.81	1.4	1	2020-04-25-00-44-20	2020-04-25-00-44-20	6	1	54	Template reloc
2020	4	25	1	13	39.05	38.0365	22.9869	5.94	n/a	2	2020-04-25-01-13-39	2020-04-23-06-19-30	77	1	103	Detection relocated
2020	4	25	1	14	29.18	38.0063	22.9932	5.41	0.7	2	2020-04-25-01-14-29	2020-04-25-18-45-56	77	1	103	Detection relocated
2020	4	25	2	27	35.63	38.0241	22.9969	5.28	1.4	2	2020-04-25-02-27-35	2020-04-25-18-45-56	77	1	103	Detection relocated
2020	4	25	2	35	55.72	38.0482	22.9898	6.2	n/a	2	2020-04-25-02-35-55	2020-05-15-13-13-55	93	1	110	Detection relocated
2020	4	25	2	52	10.33	38.035	22.9805	6.11	0.4	2	2020-04-25-02-52-10	2020-04-23-06-19-30	77	1	103	Detection relocated
2020	4	25	5	46	26.48	38.0166	22.9776	6.24	0.5	2	2020-04-25-05-46-26	2020-04-21-15-58-52	6	1	99	Detection relocated
2020	4	25	6	31	25.16	38.0307	22.984	6.11	n/a	2	2020-04-25-06-31-25	2020-04-21-15-58-52	6	1	99	Detection relocated
2020	4	25	8	38	39.95	37.9859	22.9736	6.39	0.7	2	2020-04-25-08-38-40	2020-04-25-12-03-08	89	1	114	Detection relocated
2020	4	25	8	51	46.46	38.1898	22.7552	7.98	1.5	2	2020-04-25-08-51-46	2020-06-13-22-27-43	94	6	121	Detection relocated
2020	4	25	12	3	7.734	38.0238	22.9947	6.94	3.1	1	2020-04-25-12-03-08	2020-04-25-12-03-08	89	1	114	Template reloc
2020	4	25	12	26	11.4	38.0247	22.978	6.19	n/a	2	2020-04-25-12-26-11	2020-04-21-15-58-52	6	1	99	Detection relocated
2020	4	25	12	47	2.83	38.0224	22.9546	6.6	n/a	2	2020-04-25-12-47-02	2020-04-05-02-42-13	6	1	79	Detection relocated
2020	4	25	12	52	44.74	38.0309	22.9783	5.36	1.2	2	2020-04-25-12-52-44	2020-04-26-20-24-30	79	1	105	Detection relocated
2020	4	25	13	12	45.37	38.0441	22.9675	6.22	0.1	2	2020-04-25-13-12-45	2020-04-04-01-45-18	6	1	79	Detection relocated
2020	4	25	13	55	24.25	38.028	22.9913	5.27	0.3	2	2020-04-25-13-55-24	2020-04-21-03-28-13	6	1	79	Detection relocated
2020	4	25	14	52	43.92	38.0432	22.9676	6.19	n/a	2	2020-04-25-14-52-43	2020-04-04-01-45-18	6	1	79	Detection relocated
2020	4	25	14	58	4.03	38.0328	22.9884	5.88	-0.7	2	2020-04-25-14-58-04	2020-04-21-15-58-52	6	1	99	Detection relocated
2020	4	25	16	10	13.9	38.0143	22.9184	5.64	n/a	2	2020-04-25-16-10-13	2020-05-19-07-37-09	48	1	109	Detection relocated
2020	4	25	16	25	45.53	38.0381	22.985	6.39	-0.1	2	2020-04-25-16-25-45	2020-04-13-13-58-38	6	1	84	Detection relocated
2020	4	25	18	45	54.611	38.0209	22.9967	5.33	1.5	1	2020-04-25-18-45-56	2020-04-25-18-45-56	77	1	103	Template reloc
2020	4	25	19	47	27.16	38.0235	22.9971	5.32	0.7	2	2020-04-25-19-47-27	2020-04-25-18-45-56	77	1	103	Detection relocated
2020	4	25	19	59	20.68	38.0045	22.9991	3.99	1.1	2	2020-04-25-19-59-20	2020-04-24-18-58-43	6	1	99	Detection relocated
2020	4	25	21	39	47.02	38.0379	22.9964	5.55	0.1	2	2020-04-25-21-39-47	2020-04-23-06-19-30	77	1	103	Detection relocated
2020	4	25	22	16	6.16	38.2825	22.7329	4.16	n/a	2	2020-04-25-22-16-06	2020-04-21-23-59-35	85	7	113	Detection relocated
2020	4	25	22	51	7.54	38.0364	22.988	5.89	1	2	2020-04-25-22-51-07	2020-04-23-06-19-30	77	1	103	Detection relocated
2020	4	25	22	59	56.7	38.2825	22.7327	4.15	1.2	2	2020-04-25-22-59-56	2020-04-21-23-59-35	85	7	113	Detection relocated
2020	4	25	23	23	48.04	38.2826	22.7324	4.15	1	2	2020-04-25-23-23-48	2020-04-21-23-59-35	85	7	113	Detection relocated
2020	4	26	1	24	38.97	38.0126	22.9796	5.37	1.4	2	2020-04-26-01-24-38	2020-04-21-21-47-45	87	1	63	Detection relocated
2020	4	26	3	31	27.11	38.0064	22.997	3.97	0.1	2	2020-04-26-03-31-27	2020-04-24-18-58-43	6	1	99	Detection relocated
2020	4	26	3	51	31.25	38.0351	22.9919	5.5	n/a	2	2020-04-26-03-51-31	2020-05-15-13-13-55	93	1	110	Detection relocated
2020	4	26	5	1	13.66	38.283	22.7351	4.01	1	2	2020-04-26-05-01-13	2020-04-21-23-59-35	85	7	113	Detection relocated
2020	4	26	6	17	32.45	38.0377	22.9971	5.48	0.4	2	2020-04-26-06-17-32	2020-04-23-06-19-30	77	1	103	Detection relocated
2020	4	26	8	15	18.18	38.0667	22.9463	6.92	0.5	2	2020-04-26-08-15-18	2020-05-15-15-41-15	6	2	51	Detection relocated
2020	4	26	10	17	40.59	38.1874	22.7625	14.08	1.6	2	2020-04-26-10-17-40	2020-09-13-05-53-12	95	6	122	Detection relocated
2020	4	26	10	28	55.08	38.0428	22.926	5.88	n/a	2	2020-04-26-10-28-55	2020-05-19-07-37-09	48	1	109	Detection relocated
2020	4	26	10	49	3.17	38.0508	22.905	11.33	0.5	2	2020-04-26-10-49-03	2020-04-28-02-43-29	55	2	48	Detection relocated
2020	4	26	13	4	28.61	38.0407	22.9771	6.4	n/a	2	2020-04-26-13-04-28	2020-04-13-13-58-38	6	1	84	Detection relocated
2020	4	26	13	42	30.13	38.0509	22.9748	5.87	1	2	2020-04-26-13-42-30	2020-04-23-06-19-30	77	1	103	Detection relocated
2020	4	26	13	51	48.47	38.0181	22.997	5.35	n/a	2	2020-04-26-13-51-48	2020-04-25-18-45-56	77	1	103	Detection relocated
2020	4	26	14	1	42.1	38.0352	23.004	4.93	-0.3	2	2020-04-26-14-01-42	2020-04-25-18-45-56	77	1	103	Detection relocated
2020	4	26	14	40	21.59	38.0782	22.9309	5.87	0.1	2	2020-04-26-14-40-21	2020-05-24-20-08-36	6	2	63	Detection relocated
2020	4	26	14	40	45.18	38.0156	22.9468	4.51	n/a	2	2020-04-26-14-40-45	2020-04-27-04-53-51	6	1	110	Detection relocated
2020	4	26	15	45	43.07	38.0372	23.0004	5.45	0.2	2	2020-04-26-15-45-43	2020-04-23-06-19-30	77	1	103	Detection relocated
2020	4	26	16	10	39.04	38.023	22.9973	5.35	0.9	2	2020-04-26-16-10-39	2020-04-25-18-45-56	77	1	103	Detection relocated
2020	4	26	16	19	54.41	38.0428	23.0063	4.3	0.8	2	2020-04-26-16-19-54	2020-04-25-18-45-56	77	1	103	Detection relocated
2020	4	26	18	38	8	38.0433	22.9542	6.27	n/a	2	2020-04-26-18-38-08	2020-04-04-01-45-18	6	1	79	Detection relocated
2020	4	26	18	46	5.04	38.0319	22.999	5.34	n/a	2	2020-04-26-18-46-05	2020-04-25-18-45-56	77	1	103	Detection relocated
2020	4	26	18	55	7.52	38.0109	22.9765	5.44	-0.2	2	2020-04-26-18-55-07	2020-04-21-03-28-13	6	1	79	Detection relocated
2020	4	26	19	20	31.12	38.0174	22.9781	6.2	0.8	2	2020-04-26-19-20-31	2020-04-21-15-58-52	6	1	99	Detection relocated
2020	4	26	19	56	18.16	38.0188	22.9437	8.53	-0.1	2	2020-04-26-19-56-18	2020-05-16-19-57-00	6	1	51	Detection relocated
2020	4	26	20	24	28.612	38.0305	22.9753	5.48	1.9	1	2020-04-26-20-24-30	2020-04-26-20-24-30	79	1	105	Template reloc
2020	4	26	21	36	6.6	38.035	22.9865	5.86	0.6	2	2020-04-26-21-36-06	2020-04-23-06-19-30	77	1	103	Detection relocated
2020	4	26	22	9	15.44	38.0379	22.9813	5.87	0	2	2020-04-26-22-09-15	2020-05-15-13-13-55	93	1	110	Detection relocated
2020	4	26	22	21	19.08	38.0296	22.975	5.47	1.1	2	2020-04-26-22-21-19	2020-04-26-20-24-30	79	1	105	Detection relocated
2020	4	26	23	2	43.4	38.0245	22.9971	5.3	0.7	2	2020-04-26-23-02-43	2020-04-25-18-45-56	77	1	103	Detection relocated
2020	4	26	23	29	38	38.1296	22.6109	11.61	0.7	2	2020-04-26-23-29-38	2020-04-17-17-17-44	72	9	97	Detection relocated
2020	4	27	0	2	16.545	38.0628	22.8281	11.67	1.8	1	2020-04-27-00-02-17	2020-04-27-00-02-17	44	3	67	Template reloc
2020	4	27	0	38	13.25	38.0614	22.8276	11.62	0.3	2	2020-04-27-00-38-13	2020-04-27-00-02-17	44	3	67	Detection relocated
2020	4	27	1	18	7.367	38.188	22.7032	5.97	1.2	1	2020-04-27-01-18-06	2020-04-27-01-18-06	96	6	123	Template reloc
2020	4	27	2	26	51.42	38.0323	22.9471	8.55	0	2	2020-04-27-02-26-51	2020-05-16-19-57-00	6	1	51	Detection relocated
2020	4	27	4	2	10.72	38.1776	22.7242	16.77	n/a	2	2020-04-27-04-02-10	2020-04-10-09-26-30	14	6	25	Detection relocated
2020	4	27	4	44	2.74	38.0356	22.9459	5.72	n/a	2	2020-04-27-04-44-02	2020-05-07-02-14-28	6	1	26	Detection relocated
2020	4	27	4	53	49.969	38.0179	22.9501	4.52	2.1	1	2020-04-27-04-53-51	2020-04-27-04-53-51	6	1	110	Template reloc
2020	4	27	7	9	8.86	38.0365	22.9801	6.12	1.2	2	2020-04-27-07-09-08	2020-04-23-06-19-30	77	1	103	Detection relocated
2020	4	27	8	16	15.4	38.1587	22.62	12.58	0.6	2	2020-04-27-08-16-15	2020-04-27-11-20-38	92	9	119	Detection relocated
2020	4	27	8	42	16.754	38.1569	22.6187	12.68	1.7	1	2020-04-27-08-42-18	2020-04-27-08-42-18	92	9	119	Template reloc
2020	4	27	9	57	1.83	38.0203	23.0007	5.33	0.5	2	2020-04-27-09-57-01	2020-04-25-18-45-56	77	1	103	Detection relocated
2020	4	27	11	20	38.604	38.1614	22.6161	12.33	1.6	1	2020-04-27-11-20-38	2020-04-27-11-20-38	92	9	119	Template reloc
2020	4	27	11	27	37.85	38.1593	22.6185	11.24	0.5	2	2020-04-27-11-27-37	2020-04-27-11-20-38	92	9	119	Detection relocated
2020	4	27	12	28	42.41	38.157	22.6177	12.78	0.6	2	2020-04-27-12-28-42	2020-04-27-08-42-18	92	9	119	Detection relocated
2020	4	27	14	11	44.25	38.0187	22.9454	8.47	-0.5	2	2020-04-27-14-11-44	2020-05-16-19-57-00	6	1	51	Detection relocated
2020	4	27	15	4	0.139999	38.0378	22.99	5.86	n/a	2	2020-04-27-15-04-00	2020-04-23-06-19-30	77	1	103	Detection relocated
2020	4	27	15	5	3.89	38.0363	22.9812	5.81	n/a	2	2020-04-27-15-05-03	2020-05-15-13-13-55	93	1	110	Detection relocated
2020	4	27	15	39	25.41	38.0138	22.9831	5.38	n/a	2	2020-04-27-15-39-25	2020-04-21-03-28-13	6	1	79	Detection relocated
2020	4	27	15	46	45.32	38.1331	22.6045	9.95	0.5	2	2020-04-27-15-46-45	2020-05-04-06-24-06	97	9	124	Detection relocated
2020	4	27	16	10	14.15	38.1603	22.6161	12.32	0.6	2	2020-04-27-16-10-14	2020-04-27-11-20-38	92	9	119	Detection relocated
2020	4	27	16	20	47.42	38.1567	22.6186	12.74	1.1	2	2020-04-27-16-20-47	2020-04-27-08-42-18	92	9	119	Detection relocated
2020	4	27	16	44	26.66	38.1292	22.6097	9.26	n/a	2	2020-04-27-16-44-26	2020-05-05-01-53-14	97	9	124	Detection relocated
2020	4	27	17	26	27.76	38.163	22.6198	12.05	1.1	2	2020-04-27-17-26-27	2020-04-27-11-20-38	92	9	119	Detection relocated
2020	4	27	18	31	14.52	38.0742	22.922	5.96	0.1	2	2020-04-27-18-31-14	2020-05-24-20-08-36	6	2	63	Detection relocated
2020	4	27	19	37	39.52	38.0601	22.9211	7.08	0.4	2	2020-04-27-19-37-39	2020-05-15-15-41-15	6	2	51	Detection relocated
2020	4	27	19	53	46.36	38.1675	22.6373	15.03	0.9	2	2020-04-27-19-53-46	2021-05-09-08-18-54	98	9	61	Detection relocated
2020	4	27	21	20	52.38	38.1643	22.6224	11.98	0.8	2	2020-04-27-21-20-52	2020-04-27-08-42-18	92	9	119	Detection relocated
2020	4	27	21	36	10.58	38.031	22.9481	8.51	0.3	2	2020-04-27-21-36-10	2020-05-16-19-57-00	6	1	51	Detection relocated
2020	4	27	22	5	26.52	38.0349	22.9841	5.98	1.1	2	2020-04-27-22-05-26	2020-04-23-06-19-30	77	1	103	Detection relocated
2020	4	27	22	43	19.44	38.0372	23.0018	4.91	0	2	2020-04-27-22-43-19	2020-04-25-18-45-56	77	1	103	Detection relocated
2020	4	27	23	48	3.72	38.0798	22.9159	6.31	n/a	2	2020-04-27-23-48-03	2020-05-24-20-08-36	6	2	63	Detection relocated
2020	4	28	2	17	35.09	38.1603	22.6215	13.32	1	2	2020-04-28-02-17-35	2020-04-28-16-15-42	99	9	125	Detection relocated
2020	4	28	2	43	29.716	38.0525	22.9061	11.36	1	1	2020-04-28-02-43-29	2020-04-28-02-43-29	55	2	48	Template reloc
2020	4	28	2	53	25.25	38.16	22.6219	13.41	0.2	2	2020-04-28-02-53-25	2020-04-28-16-15-42	99	9	125	Detection relocated
2020	4	28	3	26	31.45	38.0539	22.9842	5.56	1.1	2	2020-04-28-03-26-31	2020-04-23-06-19-30	77	1	103	Detection relocated
2020	4	28	4	41	25.95	38.0373	22.9797	5.86	n/a	2	2020-04-28-04-41-25	2020-05-15-13-13-55	93	1	110	Detection relocated
2020	4	28	6	8	55.27	38.0055	22.9843	6.01	1.4	2	2020-04-28-06-08-55	2020-04-23-06-19-30	77	1	103	Detection relocated
2020	4	28	7	7	0.18	38.0517	22.9054	11.37	0.7	2	2020-04-28-07-07-00	2020-04-28-02-43-29	55	2	48	Detection relocated
2020	4	28	8	0	33.18	38.0365	22.9858	5.97	0	2	2020-04-28-08-00-33	2020-04-23-06-19-30	77	1	103	Detection relocated
2020	4	28	9	34	59.72	38.05	22.9347	7.07	1.6	2	2020-04-28-09-34-59	2020-05-12-14-58-08	6	2	54	Detection relocated
2020	4	28	10	19	26.14	38.0599	22.9189	11.37	0.1	2	2020-04-28-10-19-26	2020-04-28-02-43-29	55	2	48	Detection relocated
2020	4	28	13	20	21.54	38.0378	22.9366	8.34	n/a	2	2020-04-28-13-20-21	2020-06-23-13-02-23	6	1	9	Detection relocated
2020	4	28	14	15	54.09	38.0432	22.9582	6.23	n/a	2	2020-04-28-14-15-54	2020-04-04-01-45-18	6	1	79	Detection relocated
2020	4	28	16	10	3.5	38.0297	22.9568	6.78	n/a	2	2020-04-28-16-10-03	2020-04-03-09-36-54	6	1	79	Detection relocated
2020	4	28	16	15	40.961	38.1598	22.6219	13.36	1.9	1	2020-04-28-16-15-42	2020-04-28-16-15-42	99	9	125	Template reloc
2020	4	28	16	26	2.15	38.1594	22.6195	13.37	0.5	2	2020-04-28-16-26-02	2020-04-28-16-15-42	99	9	125	Detection relocated
2020	4	28	17	6	46.32	38.0032	22.9981	3.93	0.3	2	2020-04-28-17-06-46	2020-04-24-18-58-43	6	1	99	Detection relocated
2020	4	28	17	31	34.18	38.0504	22.9041	11.37	0.6	2	2020-04-28-17-31-34	2020-04-28-02-43-29	55	2	48	Detection relocated
2020	4	28	18	37	17.88	38.0509	22.9055	11.32	0.4	2	2020-04-28-18-37-17	2020-04-28-02-43-29	55	2	48	Detection relocated
2020	4	28	18	53	7	38.172	22.6316	12.92	0.8	2	2020-04-28-18-53-07	2020-04-28-16-15-42	99	9	125	Detection relocated
2020	4	28	19	51	14	38.0831	22.8114	46.46	0.5	2	2020-04-28-19-51-13	2020-01-19-01-42-58	1	4	4	Detection relocated
2020	4	28	20	2	58.4	38.0863	22.8194	46.31	0.3	2	2020-04-28-20-02-58	2020-01-19-01-42-58	1	4	4	Detection relocated
2020	4	28	20	14	9.88	38.16	22.6223	13.38	0.8	2	2020-04-28-20-14-09	2020-04-28-16-15-42	99	9	125	Detection relocated
2020	4	28	20	16	12.54	38.16	22.6227	13.43	0.5	2	2020-04-28-20-16-12	2020-04-28-16-15-42	99	9	125	Detection relocated
2020	4	28	20	43	22.84	38.0272	22.9978	5.31	-0.1	2	2020-04-28-20-43-22	2020-04-25-18-45-56	77	1	103	Detection relocated
2020	4	28	21	26	43.3	38.0166	22.9781	6.23	0.3	2	2020-04-28-21-26-43	2020-04-21-15-58-52	6	1	99	Detection relocated
2020	4	28	21	32	57.64	38.0175	22.9782	6.23	0.7	2	2020-04-28-21-32-57	2020-04-21-15-58-52	6	1	99	Detection relocated
2020	4	28	22	42	17.62	38.0317	22.9499	6.66	n/a	2	2020-04-28-22-42-17	2020-04-13-13-58-38	6	1	84	Detection relocated
2020	4	28	23	12	48.08	38.1605	22.6205	13.61	0.3	2	2020-04-28-23-12-48	2020-04-28-16-15-42	99	9	125	Detection relocated
2020	4	29	0	32	4.204	38.1408	22.8801	14.63	1.4	1	2020-04-29-00-32-04	2020-04-29-00-32-04	100	2	126	Template reloc
2020	4	29	7	20	52.71	38.0368	22.9878	5.65	n/a	2	2020-04-29-07-20-52	2020-05-15-13-13-55	93	1	110	Detection relocated
2020	4	29	7	23	53.63	38.0352	22.9654	5.92	n/a	2	2020-04-29-07-23-53	2020-05-15-13-13-55	93	1	110	Detection relocated
2020	4	29	15	21	38.92	38.0437	22.9564	6.25	0.1	2	2020-04-29-15-21-38	2020-04-04-01-45-18	6	1	79	Detection relocated
2020	4	29	21	23	31.92	38.0506	22.9051	11.33	0	2	2020-04-29-21-23-31	2020-04-28-02-43-29	55	2	48	Detection relocated
2020	4	30	4	47	47.56	38.0054	22.9723	6.36	0.1	2	2020-04-30-04-47-47	2020-05-09-05-42-20	6	1	84	Detection relocated
2020	4	30	5	0	10.29	38.0294	22.9637	6.93	0.4	2	2020-04-30-05-00-10	2020-05-09-05-42-20	6	1	84	Detection relocated
2020	4	30	5	48	56.3	38.0164	22.9494	4.54	1.3	2	2020-04-30-05-48-56	2020-04-27-04-53-51	6	1	110	Detection relocated
2020	4	30	5	55	17.2	38.0261	22.9665	6.84	0.2	2	2020-04-30-05-55-17	2020-05-09-05-42-20	6	1	84	Detection relocated
2020	4	30	6	8	3.84	38.1429	22.6457	12.41	1.1	2	2020-04-30-06-08-03	2020-05-03-09-26-16	101	9	127	Detection relocated
2020	4	30	6	17	25.87	38.1577	22.6073	10.58	0.7	2	2020-04-30-06-17-25	2021-05-28-23-46-53	102	9	128	Detection relocated
2020	4	30	6	33	6.58	38.0461	22.9749	6.24	n/a	2	2020-04-30-06-33-06	2020-04-04-01-45-18	6	1	79	Detection relocated
2020	4	30	6	47	36.67	38.0389	22.9483	3.84	1.6	2	2020-04-30-06-47-36	2020-07-10-19-56-41	6	1	110	Detection relocated
2020	4	30	7	29	33.16	38.046	22.9615	6.31	n/a	2	2020-04-30-07-29-33	2020-04-04-01-45-18	6	1	79	Detection relocated
2020	4	30	7	52	36.84	38.1389	22.6405	12.16	0.9	2	2020-04-30-07-52-36	2020-05-03-09-26-16	101	9	127	Detection relocated
2020	4	30	8	46	40.93	38.1431	22.6456	12.36	1	2	2020-04-30-08-46-40	2020-05-03-09-26-16	101	9	127	Detection relocated
2020	4	30	11	40	12.76	38.1423	22.6444	13.74	1.2	2	2020-04-30-11-40-12	2020-05-03-04-55-31	101	9	127	Detection relocated
2020	4	30	13	41	47.48	38.0607	22.9197	11.33	0.2	2	2020-04-30-13-41-47	2020-04-28-02-43-29	55	2	48	Detection relocated
2020	4	30	16	7	38.44	38.0409	22.9756	6.47	n/a	2	2020-04-30-16-07-38	2020-04-13-13-58-38	6	1	84	Detection relocated
2020	4	30	18	18	26.54	38.2166	22.6594	11.12	1.4	2	2020-04-30-18-18-26	2020-11-19-15-41-55	34	6	50	Detection relocated
2020	4	30	18	19	18.02	38.2166	22.6585	11.21	n/a	2	2020-04-30-18-19-18	2020-11-19-15-41-55	34	6	50	Detection relocated
2020	4	30	18	20	21.76	38.2168	22.6594	11.2	1.2	2	2020-04-30-18-20-21	2020-11-19-15-41-55	34	6	50	Detection relocated
2020	4	30	19	56	23.84	38.0422	22.9488	3.89	0.6	2	2020-04-30-19-56-23	2020-07-10-19-56-41	6	1	110	Detection relocated
2020	4	30	20	20	16.848	38.1105	22.7008	9.69	1.7	1	2020-04-30-20-20-17	2020-04-30-20-20-17	90	8	116	Template reloc
2020	4	30	21	10	7.8	38.0629	22.8283	11.67	0.4	2	2020-04-30-21-10-07	2020-04-27-00-02-17	44	3	67	Detection relocated
2020	4	30	22	33	48.64	38.0162	22.9967	5.36	0.3	2	2020-04-30-22-33-48	2020-04-25-18-45-56	77	1	103	Detection relocated
2020	4	30	22	36	2.24	38.0285	22.998	5.29	0.1	2	2020-04-30-22-36-02	2020-04-25-18-45-56	77	1	103	Detection relocated
2020	4	30	22	45	40.44	38.0255	22.9674	6.81	0.9	2	2020-04-30-22-45-40	2020-05-09-05-42-20	6	1	84	Detection relocated
2020	4	30	22	47	8.02	38.0322	22.9992	5.31	0.2	2	2020-04-30-22-47-08	2020-04-25-18-45-56	77	1	103	Detection relocated
2020	4	30	22	53	51.52	38.0382	22.9807	5.89	n/a	2	2020-04-30-22-53-51	2020-05-15-13-13-55	93	1	110	Detection relocated
2020	4	30	23	8	52.96	38.0282	22.9666	6.88	0.5	2	2020-04-30-23-08-52	2020-05-09-05-42-20	6	1	84	Detection relocated
2020	5	1	0	33	9.77	38.0621	22.9655	7.8	0.1	2	2020-05-01-00-33-09	2020-06-02-00-19-43	6	2	26	Detection relocated
2020	5	1	0	42	58.19	38.0326	22.9529	5.82	0	2	2020-05-01-00-42-58	2020-07-07-13-00-03	6	1	26	Detection relocated
2020	5	1	3	18	26.64	38.0415	22.967	6.46	-0.3	2	2020-05-01-03-18-26	2020-04-13-13-58-38	6	1	84	Detection relocated
2020	5	1	3	18	57.01	38.0142	22.8775	14.17	0.3	2	2020-05-01-03-18-57	2020-08-27-12-54-49	25	3	129	Detection relocated
2020	5	1	3	21	47.5	38.0114	22.8783	14.14	0.2	2	2020-05-01-03-21-47	2020-08-27-12-54-49	25	3	129	Detection relocated
2020	5	1	3	22	17.77	37.9965	22.8797	13.92	0.3	2	2020-05-01-03-22-17	2020-08-27-12-54-49	25	3	129	Detection relocated
2020	5	1	3	28	30.36	38.018	22.9428	6.64	n/a	2	2020-05-01-03-28-30	2020-04-03-09-36-54	6	1	79	Detection relocated
2020	5	1	4	42	43.06	38.1427	22.6479	12.45	0.2	2	2020-05-01-04-42-43	2020-05-03-09-26-16	101	9	127	Detection relocated
2020	5	1	5	24	45.27	38.0144	22.9754	6.73	-0.1	2	2020-05-01-05-24-45	2020-04-13-13-58-38	6	1	84	Detection relocated
2020	5	1	5	36	55.31	38.0347	22.9421	6.12	-0.2	2	2020-05-01-05-36-55	2020-04-04-01-45-18	6	1	79	Detection relocated
2020	5	1	5	43	18.44	38.0279	22.9478	5.83	-0.1	2	2020-05-01-05-43-18	2020-07-07-13-00-03	6	1	26	Detection relocated
2020	5	1	6	1	51.6	38.1426	22.6477	12.57	0.9	2	2020-05-01-06-01-51	2020-05-03-09-26-16	101	9	127	Detection relocated
2020	5	1	6	44	42.54	38.1428	22.6473	12.57	1.3	2	2020-05-01-06-44-42	2020-05-03-09-26-16	101	9	127	Detection relocated
2020	5	1	7	15	47.14	38.1461	22.6441	12.35	1.1	2	2020-05-01-07-15-47	2020-05-03-00-24-24	101	9	127	Detection relocated
2020	5	1	9	15	54.13	38.0364	22.9478	4.65	1.1	2	2020-05-01-09-15-54	2020-05-26-20-10-03	6	1	110	Detection relocated
2020	5	1	9	27	6.42	38.0713	22.9018	4.82	n/a	2	2020-05-01-09-27-06	2020-05-23-02-13-42	6	2	63	Detection relocated
2020	5	1	10	43	47.69	38.0433	22.9702	4.82	n/a	2	2020-05-01-10-43-47	2020-05-26-20-10-03	6	1	110	Detection relocated
2020	5	1	12	22	1.36	38.0228	22.9446	8.52	-0.2	2	2020-05-01-12-22-01	2020-05-16-19-57-00	6	1	51	Detection relocated
2020	5	1	12	48	5.71	38.0376	22.9697	5.59	0	2	2020-05-01-12-48-05	2020-05-05-15-58-58	6	1	26	Detection relocated
2020	5	1	14	13	1.98	38.0613	22.9273	7.02	n/a	2	2020-05-01-14-13-01	2020-05-15-15-41-15	6	2	51	Detection relocated
2020	5	1	14	29	20.98	38.0432	22.9544	5.31	n/a	2	2020-05-01-14-29-21	2020-05-12-01-36-53	6	1	26	Detection relocated
2020	5	1	17	54	15.56	38.0684	22.9262	5.25	-0.2	2	2020-05-01-17-54-15	2020-05-20-22-40-34	6	2	42	Detection relocated
2020	5	1	18	38	57	38.0328	22.9691	6.72	n/a	2	2020-05-01-18-38-56	2020-04-03-09-36-54	6	1	79	Detection relocated
2020	5	1	19	8	20.66	38.0429	22.9347	6.81	n/a	2	2020-05-01-19-08-20	2020-07-09-16-02-50	48	1	76	Detection relocated
2020	5	1	20	44	36.12	38.0388	22.952	4.71	1.1	2	2020-05-01-20-44-36	2020-05-26-20-10-03	6	1	110	Detection relocated
2020	5	1	21	27	52.84	38.0276	22.9613	6.79	0.3	2	2020-05-01-21-27-52	2020-04-03-09-36-54	6	1	79	Detection relocated
2020	5	1	23	44	51.36	38.0367	22.9758	6.17	n/a	2	2020-05-01-23-44-51	2020-04-14-04-53-28	6	1	79	Detection relocated
2020	5	1	23	59	14.96	38.1512	22.6477	11.91	0.4	2	2020-05-01-23-59-14	2020-05-03-04-55-31	101	9	127	Detection relocated
2020	5	2	3	2	41.74	38.1491	22.6482	12.08	0.6	2	2020-05-02-03-02-41	2020-05-03-04-55-31	101	9	127	Detection relocated
2020	5	2	9	23	47.59	38.0384	22.9399	8.25	0.3	2	2020-05-02-09-23-47	2020-06-08-18-37-23	6	1	15	Detection relocated
2020	5	2	12	20	5.78	38.1514	22.6484	12.63	0.5	2	2020-05-02-12-20-05	2020-05-03-09-26-16	101	9	127	Detection relocated
2020	5	2	12	24	23.95	38.1424	22.6473	12.55	1.2	2	2020-05-02-12-24-23	2020-05-03-09-26-16	101	9	127	Detection relocated
2020	5	2	12	26	55.57	38.1426	22.6476	12.55	1.4	2	2020-05-02-12-26-55	2020-05-03-09-26-16	101	9	127	Detection relocated
2020	5	2	13	57	54.38	38.1429	22.6482	12.56	1.1	2	2020-05-02-13-57-54	2020-05-03-09-26-16	101	9	127	Detection relocated
2020	5	2	14	34	14.48	38.0428	22.9393	8.09	0.7	2	2020-05-02-14-34-14	2020-05-30-13-03-30	6	1	92	Detection relocated
2020	5	2	15	7	25.66	38.143	22.6399	12.31	1	2	2020-05-02-15-07-25	2020-05-03-09-26-16	101	9	127	Detection relocated
2020	5	2	16	35	8.98	38.0314	22.9509	5.82	0	2	2020-05-02-16-35-08	2020-07-07-13-00-03	6	1	26	Detection relocated
2020	5	2	18	0	5.28	38.0469	22.9277	6.61	0.5	2	2020-05-02-18-00-05	2020-07-06-20-38-19	6	2	92	Detection relocated
2020	5	2	18	45	24.2	38.0565	22.9356	6.55	n/a	2	2020-05-02-18-45-23	2020-07-08-12-31-35	6	2	51	Detection relocated
2020	5	2	18	56	39.22	38.0414	22.9525	6.25	0.4	2	2020-05-02-18-56-39	2020-04-04-01-45-18	6	1	79	Detection relocated
2020	5	2	19	1	46.66	38.1507	22.6477	14.27	n/a	2	2020-05-02-19-01-46	2020-05-03-09-26-16	101	9	127	Detection relocated
2020	5	2	19	25	58.48	38.1429	22.6477	12.51	0.6	2	2020-05-02-19-25-58	2020-05-03-09-26-16	101	9	127	Detection relocated
2020	5	2	20	4	16.88	38.0316	22.9407	8.1	0.2	2	2020-05-02-20-04-16	2020-05-31-15-41-11	6	1	92	Detection relocated
2020	5	2	21	26	41.46	38.1485	22.6501	12.94	1	2	2020-05-02-21-26-41	2020-05-03-04-55-31	101	9	127	Detection relocated
2020	5	2	21	39	28.44	38.1526	22.64	14.51	n/a	2	2020-05-02-21-39-28	2020-05-03-04-55-31	101	9	127	Detection relocated
2020	5	2	23	6	40.2	38.1431	22.6479	12.55	0.7	2	2020-05-02-23-06-40	2020-05-03-09-26-16	101	9	127	Detection relocated
2020	5	2	23	42	0.220001	38.1428	22.6416	14.25	0.7	2	2020-05-02-23-42-00	2020-05-03-09-26-16	101	9	127	Detection relocated
2020	5	2	23	54	11.32	38.1481	22.6497	11.94	0.2	2	2020-05-02-23-54-11	2020-05-03-04-55-31	101	9	127	Detection relocated
2020	5	3	0	24	23.93	38.1452	22.6437	11.94	1.4	1	2020-05-03-00-24-24	2020-05-03-00-24-24	101	9	127	Template reloc
2020	5	3	0	34	29.664	38.2446	22.7361	2.39	1.6	1	2020-05-03-00-34-30	2020-05-03-00-34-30	103	7	130	Template reloc
2020	5	3	0	58	39.474	38.1647	22.6092	12.96	1.6	1	2020-05-03-00-58-39	2020-05-03-00-58-39	104	9	131	Template reloc
2020	5	3	1	6	34.67	38.0529	22.9379	7.6	n/a	2	2020-05-03-01-06-34	2020-07-07-19-23-21	6	2	54	Detection relocated
2020	5	3	2	47	11.16	38.0261	22.9676	6.84	0.3	2	2020-05-03-02-47-11	2020-05-09-05-42-20	6	1	84	Detection relocated
2020	5	3	3	47	57.12	38.1688	22.629	13.03	1	2	2020-05-03-03-47-57	2020-05-04-21-18-57	105	9	125	Detection relocated
2020	5	3	4	30	24.37	38.0356	22.967	6.27	n/a	2	2020-05-03-04-30-24	2020-04-14-04-53-28	6	1	79	Detection relocated
2020	5	3	4	41	49.58	38.0242	22.9593	12.22	n/a	2	2020-05-03-04-41-49	2020-05-09-05-42-20	6	1	84	Detection relocated
2020	5	3	4	55	30.913	38.1458	22.6481	12.14	2	1	2020-05-03-04-55-31	2020-05-03-04-55-31	101	9	127	Template reloc
2020	5	3	7	31	23.25	38.0412	22.9576	7.34	n/a	2	2020-05-03-07-31-23	2020-05-09-05-42-20	6	1	84	Detection relocated
2020	5	3	9	26	15.226	38.143	22.6471	12.59	1.8	1	2020-05-03-09-26-16	2020-05-03-09-26-16	101	9	127	Template reloc
2020	5	3	9	30	55.51	38.0426	22.9483	6.11	n/a	2	2020-05-03-09-30-55	2020-05-07-02-14-28	6	1	26	Detection relocated
2020	5	3	9	56	4.329	38.026	22.961	4.87	1.2	1	2020-05-03-09-56-04	2020-05-03-09-56-04	6	1	26	Template reloc
2020	5	3	11	41	16.23	38.0482	22.9448	9.8	n/a	2	2020-05-03-11-41-16	2020-05-22-18-58-33	6	1	54	Detection relocated
2020	5	3	12	9	5.4	38.0391	22.9813	6.42	0.1	2	2020-05-03-12-09-05	2020-04-13-13-58-38	6	1	84	Detection relocated
2020	5	3	12	12	31.46	38.0736	22.9058	5.27	n/a	2	2020-05-03-12-12-31	2020-05-23-02-13-42	6	2	63	Detection relocated
2020	5	3	14	6	6.59	38.1378	22.6093	9.29	0.5	2	2020-05-03-14-06-06	2020-05-05-01-53-14	97	9	124	Detection relocated
2020	5	3	16	15	6.37	38.1794	22.6231	15.45	n/a	2	2020-05-03-16-15-06	2020-05-04-17-40-00	106	9	132	Detection relocated
2020	5	3	17	24	2.28	38.0366	22.9727	5.8	-0.1	2	2020-05-03-17-24-02	2020-07-07-13-00-03	6	1	26	Detection relocated
2020	5	3	19	14	30.68	38.1679	22.6305	12.87	1	2	2020-05-03-19-14-30	2020-05-04-21-18-57	105	9	125	Detection relocated
2020	5	3	19	30	43.68	38.0439	22.975	6.16	n/a	2	2020-05-03-19-30-43	2020-04-04-01-45-18	6	1	79	Detection relocated
2020	5	3	21	54	33.82	38.137	22.6073	9.48	0.7	2	2020-05-03-21-54-33	2020-05-05-01-53-14	97	9	124	Detection relocated
2020	5	4	5	12	49.11	38.0759	22.9346	8.31	n/a	2	2020-05-04-05-12-49	2020-05-24-02-51-46	6	2	47	Detection relocated
2020	5	4	5	28	58	38.0222	22.9843	11.12	1.7	1	2020-05-04-05-28-29	2020-05-04-05-28-29	6	1	84	Template reloc
2020	5	4	6	18	31.83	38.0512	22.9461	8.17	n/a	2	2020-05-04-06-18-31	2020-05-22-18-58-33	6	1	54	Detection relocated
2020	5	4	6	24	5.04	38.1359	22.604	9.94	1.7	1	2020-05-04-06-24-06	2020-05-04-06-24-06	97	9	124	Template reloc
2020	5	4	7	49	44.77	38.1675	22.6301	12.79	n/a	2	2020-05-04-07-49-44	2020-05-04-21-18-57	105	9	125	Detection relocated
2020	5	4	12	59	12.18	38.0786	23.126	3.12	1.5	1	2020-05-04-12-59-12	2020-05-04-12-59-12	6	0	26	Template loc
2020	5	4	16	5	12.76	38.1692	22.6327	12.94	n/a	2	2020-05-04-16-05-12	2020-05-04-17-23-29	106	9	132	Detection relocated
2020	5	4	16	25	38.42	38.1355	22.6094	9.65	n/a	2	2020-05-04-16-25-38	2020-05-05-01-53-14	97	9	124	Detection relocated
2020	5	4	16	55	23.5	38.0375	22.944	5.43	0.6	2	2020-05-04-16-55-23	2020-05-12-01-36-53	6	1	26	Detection relocated
2020	5	4	17	21	50.82	38.0122	22.9472	5.38	0.2	2	2020-05-04-17-21-50	2020-05-20-19-34-43	6	1	26	Detection relocated
2020	5	4	17	23	28.153	38.1708	22.6295	13.06	1.9	1	2020-05-04-17-23-29	2020-05-04-17-23-29	106	9	132	Template reloc
2020	5	4	17	39	59.632	38.1702	22.6267	13.07	2.3	1	2020-05-04-17-40-00	2020-05-04-17-40-00	106	9	132	Template reloc
2020	5	4	17	44	16.708	38.1721	22.6286	13.21	2.3	1	2020-05-04-17-44-17	2020-05-04-17-44-17	106	9	132	Template reloc
2020	5	4	18	50	16.98	38.0193	22.9526	5.58	0.3	2	2020-05-04-18-50-16	2020-05-20-19-34-43	6	1	26	Detection relocated
2020	5	4	18	55	43.6	38.1692	22.6294	13.13	n/a	2	2020-05-04-18-55-43	2020-05-04-21-18-57	105	9	125	Detection relocated
2020	5	4	20	1	56.849	38.1661	22.6261	13.18	1.6	1	2020-05-04-20-01-57	2020-05-04-20-01-57	106	9	132	Template reloc
2020	5	4	20	46	37.44	38.1675	22.6294	12.77	1	2	2020-05-04-20-46-37	2020-05-04-21-18-57	105	9	125	Detection relocated
2020	5	4	20	52	48.88	38.1249	22.7549	12.2	0.3	2	2020-05-04-20-52-48	2020-05-06-22-46-46	107	8	133	Detection relocated
2020	5	4	21	18	56.553	38.1682	22.6302	12.89	1.6	1	2020-05-04-21-18-57	2020-05-04-21-18-57	105	9	125	Template reloc
2020	5	4	21	20	47.32	38.1667	22.6305	12.73	n/a	2	2020-05-04-21-20-47	2020-05-04-21-18-57	105	9	125	Detection relocated
2020	5	4	22	5	19.32	38.1715	22.6165	12.25	n/a	2	2020-05-04-22-05-19	2020-05-04-17-44-17	106	9	132	Detection relocated
2020	5	4	22	41	39.12	38.1672	22.6306	12.79	1.1	2	2020-05-04-22-41-39	2020-05-04-21-18-57	105	9	125	Detection relocated
2020	5	4	22	45	21.26	38.1676	22.6254	13.34	n/a	2	2020-05-04-22-45-21	2020-05-04-20-01-57	106	9	132	Detection relocated
2020	5	4	22	56	27.026	38.1658	22.6305	8.41	1.2	1	2020-05-04-22-56-27	2020-05-04-22-56-27	106	9	132	Template reloc
2020	5	4	22	59	44.06	38.1674	22.6301	12.8	1	2	2020-05-04-22-59-44	2020-05-04-21-18-57	105	9	125	Detection relocated
2020	5	4	23	1	20.74	38.1676	22.6263	13.35	1	2	2020-05-04-23-01-20	2020-05-04-20-01-57	106	9	132	Detection relocated
2020	5	4	23	41	48.74	38.1363	22.6066	9.66	1	2	2020-05-04-23-41-48	2020-05-05-01-53-14	97	9	124	Detection relocated
2020	5	5	0	0	10.83	38.1616	22.6295	5.93	0.7	2	2020-05-05-00-00-10	2020-05-04-22-56-27	106	9	132	Detection relocated
2020	5	5	0	13	30.75	38.1691	22.6263	13.48	1.2	2	2020-05-05-00-13-30	2020-05-04-20-01-57	106	9	132	Detection relocated
2020	5	5	0	17	9.88	38.1622	22.6296	5.93	1.1	2	2020-05-05-00-17-09	2020-05-04-22-56-27	106	9	132	Detection relocated
2020	5	5	1	53	13.812	38.1357	22.6072	9.56	1.7	1	2020-05-05-01-53-14	2020-05-05-01-53-14	97	9	124	Template reloc
2020	5	5	1	54	26.36	38.1614	22.6141	12.07	0.9	2	2020-05-05-01-54-26	2020-04-27-11-20-38	92	9	119	Detection relocated
2020	5	5	2	25	8.32	38.1377	22.6058	9.53	n/a	2	2020-05-05-02-25-08	2020-05-05-01-53-14	97	9	124	Detection relocated
2020	5	5	2	45	36.7	38.0546	22.952	5.15	n/a	2	2020-05-05-02-45-36	2020-05-06-07-08-46	6	1	73	Detection relocated
2020	5	5	4	31	23.49	38.1604	22.6155	12.34	1.2	2	2020-05-05-04-31-23	2020-04-27-11-20-38	92	9	119	Detection relocated
2020	5	5	7	52	26.99	38.0232	22.9394	5.62	n/a	2	2020-05-05-07-52-26	2020-05-07-02-14-28	6	1	26	Detection relocated
2020	5	5	10	53	14.49	38.0301	22.9559	5.68	1.4	2	2020-05-05-10-53-14	2020-05-20-19-34-43	6	1	26	Detection relocated
2020	5	5	10	55	49.44	38.0661	22.9376	5.32	n/a	2	2020-05-05-10-55-49	2020-07-08-12-31-35	6	2	51	Detection relocated
2020	5	5	10	58	20.1	38.0302	22.9579	5.63	1.2	2	2020-05-05-10-58-20	2020-05-20-19-34-43	6	1	26	Detection relocated
2020	5	5	13	45	4.14	38.0397	22.9501	5.77	0.1	2	2020-05-05-13-45-04	2020-05-07-02-14-28	6	1	26	Detection relocated
2020	5	5	14	49	26.91	38.042	22.9547	5.14	0.9	2	2020-05-05-14-49-26	2020-05-12-01-36-53	6	1	26	Detection relocated
2020	5	5	15	58	56.651	38.0358	22.9585	5.61	1.9	1	2020-05-05-15-58-58	2020-05-05-15-58-58	6	1	26	Template reloc
2020	5	5	16	5	46.63	38.0403	22.9566	5.92	0.4	2	2020-05-05-16-05-46	2020-05-05-15-58-58	6	1	26	Detection relocated
2020	5	5	17	58	11.8	38.0389	22.9538	4.83	-0.2	2	2020-05-05-17-58-11	2020-05-12-01-36-53	6	1	26	Detection relocated
2020	5	5	18	22	13.4	38.1662	22.6279	7.43	0.8	2	2020-05-05-18-22-13	2020-05-04-22-56-27	106	9	132	Detection relocated
2020	5	5	18	35	21.54	38.0358	22.9785	5.81	-0.8	2	2020-05-05-18-35-21	2020-05-15-13-13-55	93	1	110	Detection relocated
2020	5	5	18	44	39.52	38.0226	22.9479	5.65	0	2	2020-05-05-18-44-39	2020-05-05-15-58-58	6	1	26	Detection relocated
2020	5	5	19	7	53.24	38.0454	22.975	6.24	0.5	2	2020-05-05-19-07-53	2020-04-04-01-45-18	6	1	79	Detection relocated
2020	5	5	19	22	8.786	38.2103	22.6162	5.66	1.2	1	2020-05-05-19-22-08	2020-05-05-19-22-08	28	10	43	Template reloc
2020	5	5	19	25	7.6	38.0615	22.9442	7.16	n/a	2	2020-05-05-19-25-07	2020-07-08-12-31-35	6	2	51	Detection relocated
2020	5	5	20	31	6.36	38.0427	22.9759	6.16	-0.1	2	2020-05-05-20-31-06	2020-04-04-01-45-18	6	1	79	Detection relocated
2020	5	5	21	22	50.04	38.0409	22.9551	5.82	0.6	2	2020-05-05-21-22-50	2020-05-08-20-45-23	6	1	26	Detection relocated
2020	5	5	23	11	42.88	38.0931	22.7689	7.88	0.9	2	2020-05-05-23-11-42	2020-05-05-23-40-29	108	4	134	Detection relocated
2020	5	5	23	27	20.661	38.1118	22.7782	5.83	1.1	1	2020-05-05-23-27-21	2020-05-05-23-27-21	108	4	134	Template reloc
2020	5	5	23	27	57.64	38.0928	22.7687	7.85	n/a	2	2020-05-05-23-27-57	2020-05-05-23-40-29	108	4	134	Detection relocated
2020	5	5	23	33	25.12	38.0927	22.7685	7.85	0.7	2	2020-05-05-23-33-25	2020-05-05-23-40-29	108	4	134	Detection relocated
2020	5	5	23	37	13.62	38.0931	22.7692	7.93	n/a	2	2020-05-05-23-37-13	2020-05-05-23-40-29	108	4	134	Detection relocated
2020	5	5	23	40	29.473	38.0905	22.7865	9.28	1.1	1	2020-05-05-23-40-29	2020-05-05-23-40-29	108	4	134	Template reloc
2020	5	5	23	41	38.52	38.0932	22.7692	7.92	1	2	2020-05-05-23-41-38	2020-05-05-23-40-29	108	4	134	Detection relocated
2020	5	6	0	34	59.52	38.1665	22.6277	13.6	1.6	1	2020-05-06-00-34-59	2020-05-06-00-34-59	106	9	132	Template reloc
2020	5	6	0	39	28.56	38.0931	22.7694	7.94	1	2	2020-05-06-00-39-28	2020-05-05-23-40-29	108	4	134	Detection relocated
2020	5	6	1	7	30.835	38.1619	22.6289	11.96	1.7	1	2020-05-06-01-07-30	2020-05-06-01-07-30	109	9	135	Template reloc
2020	5	6	2	52	36.75	38.0393	22.943	8.13	n/a	2	2020-05-06-02-52-36	2020-05-31-15-41-11	6	1	92	Detection relocated
2020	5	6	2	56	46.47	38.0324	22.9552	5.67	0.8	2	2020-05-06-02-56-46	2020-05-05-15-58-58	6	1	26	Detection relocated
2020	5	6	3	9	40.54	38.1407	22.7594	12.55	n/a	2	2020-05-06-03-09-40	2020-05-06-22-46-46	107	8	133	Detection relocated
2020	5	6	3	48	13.87	38.0391	22.9441	4.89	0	2	2020-05-06-03-48-13	2020-05-07-20-44-44	110	1	73	Detection relocated
2020	5	6	3	51	53.97	38.021	22.9575	6.8	n/a	2	2020-05-06-03-51-53	2020-04-03-09-36-54	6	1	79	Detection relocated
2020	5	6	5	25	40.59	38.0155	22.987	5.36	0	2	2020-05-06-05-25-40	2020-04-21-03-28-13	6	1	79	Detection relocated
2020	5	6	6	39	58.36	38.0102	22.9775	5.46	0.1	2	2020-05-06-06-39-58	2020-04-21-03-28-13	6	1	79	Detection relocated
2020	5	6	7	8	44.461	38.0483	22.9521	4.74	1.7	1	2020-05-06-07-08-46	2020-05-06-07-08-46	6	1	73	Template reloc
2020	5	6	8	27	59.45	38.041	22.9381	5.18	n/a	2	2020-05-06-08-27-59	2020-05-09-21-51-05	48	1	136	Detection relocated
2020	5	6	8	36	36.84	38.0555	22.9453	7.07	0.2	2	2020-05-06-08-36-36	2020-05-12-14-58-08	6	2	54	Detection relocated
2020	5	6	8	43	56.59	38.0439	22.9558	6.26	0.2	2	2020-05-06-08-43-56	2020-04-04-01-45-18	6	1	79	Detection relocated
2020	5	6	9	13	55.99	38.0429	22.9387	8.13	1.2	2	2020-05-06-09-13-55	2020-05-30-13-03-30	6	1	92	Detection relocated
2020	5	6	9	14	48.71	38.1601	22.6225	13.4	1.4	2	2020-05-06-09-14-48	2020-04-28-16-15-42	99	9	125	Detection relocated
2020	5	6	9	40	4.99	38.1477	22.6151	14.21	1.5	2	2020-05-06-09-40-05	2021-01-31-19-44-26	111	9	137	Detection relocated
2020	5	6	10	5	9.49	38.0497	22.9361	7.02	-0.2	2	2020-05-06-10-05-09	2020-05-12-14-58-08	6	2	54	Detection relocated
2020	5	6	10	45	55.26	38.0277	22.9468	5.57	n/a	2	2020-05-06-10-45-55	2020-05-05-15-58-58	6	1	26	Detection relocated
2020	5	6	11	7	34.56	38.1585	22.6221	13.64	0.6	2	2020-05-06-11-07-34	2020-04-28-16-15-42	99	9	125	Detection relocated
2020	5	6	11	13	32.628	38.0553	22.9369	4.48	1.4	1	2020-05-06-11-13-32	2020-05-06-11-13-32	6	1	26	Template reloc
2020	5	6	12	24	29.67	38.0932	22.7692	7.97	1.1	2	2020-05-06-12-24-29	2020-05-05-23-40-29	108	4	134	Detection relocated
2020	5	6	12	32	17.73	38.0963	22.7711	6.74	0.8	2	2020-05-06-12-32-17	2020-05-05-23-40-29	108	4	134	Detection relocated
2020	5	6	12	52	59.44	38.1375	22.6848	15.66	1.4	2	2020-05-06-12-52-59	2020-05-09-13-32-25	112	8	138	Detection relocated
2020	5	6	13	19	38.27	38.0583	22.9366	7.45	0.3	2	2020-05-06-13-19-38	2020-05-15-01-51-57	6	2	9	Detection relocated
2020	5	6	13	50	59.06	38.049	22.9571	4.74	0.8	2	2020-05-06-13-50-59	2020-05-06-07-08-46	6	1	73	Detection relocated
2020	5	6	14	3	51.12	38.0433	22.9446	5.7	-0.3	2	2020-05-06-14-03-51	2020-05-23-15-08-57	6	1	26	Detection relocated
2020	5	6	15	35	28.54	38.0289	22.9427	5.72	0.7	2	2020-05-06-15-35-28	2020-05-06-17-51-00	48	1	76	Detection relocated
2020	5	6	16	37	17.99	38.1378	22.6848	15.63	1	2	2020-05-06-16-37-17	2020-05-09-13-32-25	112	8	138	Detection relocated
2020	5	6	16	38	32.54	38.0416	22.9646	5.85	0.2	2	2020-05-06-16-38-32	2020-05-06-17-51-00	48	1	76	Detection relocated
2020	5	6	16	48	58.15	38.0412	22.946	4.85	0	2	2020-05-06-16-48-58	2020-05-07-20-44-44	110	1	73	Detection relocated
2020	5	6	16	54	4.27	38.0474	22.9512	5.09	0	2	2020-05-06-16-54-04	2020-05-09-21-51-05	48	1	136	Detection relocated
2020	5	6	17	42	36.72	38.0353	22.9447	5.86	1.1	2	2020-05-06-17-42-36	2020-05-06-17-51-00	48	1	76	Detection relocated
2020	5	6	17	50	58.194	38.0355	22.9439	5.88	1.9	1	2020-05-06-17-51-00	2020-05-06-17-51-00	48	1	76	Template reloc
2020	5	6	18	5	12.96	38.0412	22.956	5.07	0.3	2	2020-05-06-18-05-12	2020-05-12-01-36-53	6	1	26	Detection relocated
2020	5	6	18	5	38.96	38.0468	22.9471	2.87	0.1	2	2020-05-06-18-05-38	2020-05-09-00-00-51	48	1	72	Detection relocated
2020	5	6	18	29	54.76	38.0372	22.9485	5.78	0.8	2	2020-05-06-18-29-54	2020-05-06-17-51-00	48	1	76	Detection relocated
2020	5	6	18	34	55.84	38.0237	22.9591	6.78	n/a	2	2020-05-06-18-34-55	2020-04-03-09-36-54	6	1	79	Detection relocated
2020	5	6	18	38	43.36	38.0277	22.9618	5.71	0.9	2	2020-05-06-18-38-43	2020-05-20-19-34-43	6	1	26	Detection relocated
2020	5	6	18	59	5.68	38.0422	22.9488	5.07	0.5	2	2020-05-06-18-59-05	2020-05-12-01-36-53	6	1	26	Detection relocated
2020	5	6	19	2	30.76	38.0384	22.9353	5.22	n/a	2	2020-05-06-19-02-30	2020-05-09-21-51-05	48	1	136	Detection relocated
2020	5	6	20	22	16.76	38.0599	22.9304	10.29	n/a	2	2020-05-06-20-22-16	2020-07-12-06-57-27	6	2	42	Detection relocated
2020	5	6	21	29	1.52	38.1636	22.6301	12.2	0.8	2	2020-05-06-21-29-01	2020-05-06-01-07-30	109	9	135	Detection relocated
2020	5	6	21	36	46.44	38.1604	22.6222	13.48	0.4	2	2020-05-06-21-36-46	2020-04-28-16-15-42	99	9	125	Detection relocated
2020	5	6	21	52	27.12	38.0478	22.9515	2.7	-0.1	2	2020-05-06-21-52-27	2020-05-09-00-00-51	48	1	72	Detection relocated
2020	5	6	22	4	4.94	38.0486	22.9632	5.56	-0.1	2	2020-05-06-22-04-04	2020-05-23-15-08-57	6	1	26	Detection relocated
2020	5	6	22	46	45.942	38.1349	22.7483	13.34	1.6	1	2020-05-06-22-46-46	2020-05-06-22-46-46	107	8	133	Template reloc
2020	5	6	22	54	23.84	38.0428	22.9707	4.81	0	2	2020-05-06-22-54-23	2020-05-26-20-10-03	6	1	110	Detection relocated
2020	5	6	23	27	5.36	38.1609	22.6191	13.86	0.1	2	2020-05-06-23-27-05	2020-04-28-16-15-42	99	9	125	Detection relocated
2020	5	6	23	52	44.54	38.032	22.9609	5.65	0	2	2020-05-06-23-52-44	2020-05-20-19-34-43	6	1	26	Detection relocated
2020	5	7	0	19	3.14	38.0457	22.9471	5.17	0.1	2	2020-05-07-00-19-03	2020-05-09-21-51-05	48	1	136	Detection relocated
2020	5	7	1	9	12.25	38.0278	22.9544	5.7	0.8	2	2020-05-07-01-09-12	2020-05-20-19-34-43	6	1	26	Detection relocated
2020	5	7	1	56	46.24	38.0389	22.9359	5.21	n/a	2	2020-05-07-01-56-46	2020-05-09-21-51-05	48	1	136	Detection relocated
2020	5	7	2	11	58.5	38.0309	22.9621	4.94	1.1	2	2020-05-07-02-11-58	2020-05-03-09-56-04	6	1	26	Detection relocated
2020	5	7	2	14	26.967	38.0366	22.9449	5.75	1.9	1	2020-05-07-02-14-28	2020-05-07-02-14-28	6	1	26	Template reloc
2020	5	7	2	26	5.49	38.0455	22.9432	3.34	0.2	2	2020-05-07-02-26-05	2020-05-09-00-00-51	48	1	72	Detection relocated
2020	5	7	2	45	5.74	38.0355	22.9469	5.71	1	2	2020-05-07-02-45-05	2020-05-06-17-51-00	48	1	76	Detection relocated
2020	5	7	2	50	4.87	38.0333	22.9582	5.78	-0.1	2	2020-05-07-02-50-04	2020-07-07-13-00-03	6	1	26	Detection relocated
2020	5	7	3	4	15.35	38.0356	22.9397	8.25	n/a	2	2020-05-07-03-04-15	2020-06-08-18-37-23	6	1	15	Detection relocated
2020	5	7	3	7	45.68	38.0333	22.9356	8.31	0.1	2	2020-05-07-03-07-45	2020-06-08-18-37-23	6	1	15	Detection relocated
2020	5	7	3	16	46.57	38.1527	22.9756	6.65	n/a	2	2020-05-07-03-16-46	2020-03-07-08-20-11	6	2	18	Detection relocated
2020	5	7	3	33	13.07	38.0343	22.9378	5.03	1.3	2	2020-05-07-03-33-13	2020-05-07-20-44-44	110	1	73	Detection relocated
2020	5	7	3	57	9.39	38.0088	22.9751	6.48	0.3	2	2020-05-07-03-57-09	2020-05-09-05-42-20	6	1	84	Detection relocated
2020	5	7	4	17	3.59	38.0355	22.9368	5.1	0.7	2	2020-05-07-04-17-03	2020-05-07-20-44-44	110	1	73	Detection relocated
2020	5	7	4	17	23.18	38.0326	22.9653	6.79	n/a	2	2020-05-07-04-17-23	2020-04-03-09-36-54	6	1	79	Detection relocated
2020	5	7	4	29	8.16	38.17	22.6289	11.68	1.6	2	2020-05-07-04-29-08	2020-05-07-08-36-14	109	9	135	Detection relocated
2020	5	7	4	45	25.81	38.0096	22.9507	5.33	0.1	2	2020-05-07-04-45-25	2020-05-20-19-34-43	6	1	26	Detection relocated
2020	5	7	5	4	17.82	38.0188	22.9326	5.03	n/a	2	2020-05-07-05-04-17	2020-05-07-20-44-44	110	1	73	Detection relocated
2020	5	7	6	45	39.58	38.1635	22.6302	12.19	n/a	2	2020-05-07-06-45-39	2020-05-06-01-07-30	109	9	135	Detection relocated
2020	5	7	7	5	35.28	38.01	22.9798	5.44	1.5	2	2020-05-07-07-05-35	2020-04-21-21-47-45	87	1	63	Detection relocated
2020	5	7	7	42	8	38.0315	22.9597	5.62	0.7	2	2020-05-07-07-42-08	2020-05-20-19-34-43	6	1	26	Detection relocated
2020	5	7	7	46	58.11	38.034	22.9434	5.88	1.1	2	2020-05-07-07-46-58	2020-05-06-17-51-00	48	1	76	Detection relocated
2020	5	7	8	36	13.774	38.1702	22.6291	11.78	2	1	2020-05-07-08-36-14	2020-05-07-08-36-14	109	9	135	Template reloc
2020	5	7	9	7	16.06	38.1697	22.6286	11.62	1.6	2	2020-05-07-09-07-16	2020-05-07-08-36-14	109	9	135	Detection relocated
2020	5	7	9	44	26.99	38.0462	22.9463	2.82	0.5	2	2020-05-07-09-44-26	2020-05-09-00-00-51	48	1	72	Detection relocated
2020	5	7	9	56	33.04	38.0369	22.9406	8.24	n/a	2	2020-05-07-09-56-33	2020-06-08-18-37-23	6	1	15	Detection relocated
2020	5	7	10	55	47.82	38.0406	22.9402	5.03	-0.1	2	2020-05-07-10-55-47	2020-05-07-20-44-44	110	1	73	Detection relocated
2020	5	7	11	4	30.09	38.0443	22.8917	14.74	1.7	1	2020-05-07-11-04-29	2020-05-07-11-04-29	6	3	139	Template reloc
2020	5	7	11	44	18.84	38.0533	22.9463	3.86	n/a	2	2020-05-07-11-44-18	2020-05-09-00-00-51	48	1	72	Detection relocated
2020	5	7	11	50	36.12	38.0279	22.9592	5.16	1.3	2	2020-05-07-11-50-36	2020-07-05-01-42-53	6	1	73	Detection relocated
2020	5	7	12	49	4.86	38.1635	22.6303	12.09	1.3	2	2020-05-07-12-49-04	2020-05-06-01-07-30	109	9	135	Detection relocated
2020	5	7	13	27	18.62	38.0424	22.9522	6.74	n/a	2	2020-05-07-13-27-18	2020-05-05-15-58-58	6	1	26	Detection relocated
2020	5	7	15	4	32.58	38.0597	22.9507	8.43	0.6	2	2020-05-07-15-04-32	2020-05-20-16-19-25	6	2	56	Detection relocated
2020	5	7	16	32	27.46	38.0212	22.9369	8.05	n/a	2	2020-05-07-16-32-27	2020-05-31-15-41-11	6	1	92	Detection relocated
2020	5	7	16	42	11.35	38.0624	22.94	5.83	0	2	2020-05-07-16-42-11	2020-07-06-20-38-19	6	2	92	Detection relocated
2020	5	7	16	45	22.75	38.1411	22.6906	13.02	0.9	2	2020-05-07-16-45-22	2021-05-16-18-23-18	113	8	140	Detection relocated
2020	5	7	17	3	32.64	38.0376	22.9344	5.23	1	2	2020-05-07-17-03-32	2020-05-09-21-51-05	48	1	136	Detection relocated
2020	5	7	17	47	29.12	38.0121	22.9561	5.47	n/a	2	2020-05-07-17-47-29	2020-05-20-19-34-43	6	1	26	Detection relocated
2020	5	7	18	5	9.52	38.0477	22.9518	5.51	n/a	2	2020-05-07-18-05-09	2020-05-22-15-32-38	6	1	141	Detection relocated
2020	5	7	18	19	40.42	38.0436	22.942	5.21	-0.2	2	2020-05-07-18-19-40	2020-05-09-21-51-05	48	1	136	Detection relocated
2020	5	7	18	38	10.92	38.0092	22.9344	4.27	0.5	2	2020-05-07-18-38-10	2020-05-09-21-51-05	48	1	136	Detection relocated
2020	5	7	20	44	42.84	38.0332	22.9382	4.95	1.8	1	2020-05-07-20-44-44	2020-05-07-20-44-44	110	1	73	Template reloc
2020	5	7	20	46	20.32	38.1635	22.6302	12.19	0.7	2	2020-05-07-20-46-20	2020-05-06-01-07-30	109	9	135	Detection relocated
2020	5	7	20	52	16.82	38.0122	22.941	4.77	0.3	2	2020-05-07-20-52-16	2020-05-23-21-32-47	110	1	73	Detection relocated
2020	5	7	21	18	38.36	38.0343	22.9381	5	0.9	2	2020-05-07-21-18-38	2020-05-07-20-44-44	110	1	73	Detection relocated
2020	5	7	21	52	30.36	38.0425	22.9931	6.11	1.6	1	2020-05-07-21-52-30	2020-05-07-21-52-30	88	1	115	Template reloc
2020	5	7	22	5	32	38.0154	22.938	8.05	0.6	2	2020-05-07-22-05-32	2020-05-31-15-41-11	6	1	92	Detection relocated
2020	5	7	22	5	46.5	38.0443	22.9684	6.25	0.3	2	2020-05-07-22-05-46	2020-04-04-01-45-18	6	1	79	Detection relocated
2020	5	7	22	18	17.26	38.0295	22.9351	8.14	0.1	2	2020-05-07-22-18-17	2020-05-31-15-41-11	6	1	92	Detection relocated
2020	5	7	22	36	15.4	38.1695	22.6288	11.82	1.3	2	2020-05-07-22-36-15	2020-05-07-08-36-14	109	9	135	Detection relocated
2020	5	7	22	37	28.96	38.0409	22.9509	8.11	0.1	2	2020-05-07-22-37-28	2020-05-31-15-41-11	6	1	92	Detection relocated
2020	5	7	22	40	12.84	38.0435	22.9603	6.24	0.6	2	2020-05-07-22-40-12	2020-04-04-01-45-18	6	1	79	Detection relocated
2020	5	7	22	59	10.74	38.0304	22.9469	4.97	0	2	2020-05-07-22-59-10	2020-05-23-21-32-47	110	1	73	Detection relocated
2020	5	7	23	28	28.9	38.0292	22.9568	5.64	n/a	2	2020-05-07-23-28-28	2020-05-20-19-34-43	6	1	26	Detection relocated
2020	5	7	23	54	4.7	38.0071	22.9308	4.42	0.1	2	2020-05-07-23-54-04	2020-05-07-20-44-44	110	1	73	Detection relocated
2020	5	8	0	6	29.65	38.0384	22.9547	4.84	0.9	2	2020-05-08-00-06-29	2020-07-05-01-42-53	6	1	73	Detection relocated
2020	5	8	0	13	43.04	38.041	22.9377	5.19	-0.1	2	2020-05-08-00-13-43	2020-05-09-21-51-05	48	1	136	Detection relocated
2020	5	8	0	28	16.149	38.1283	22.621	2.89	1.3	1	2020-05-08-00-28-16	2020-05-08-00-28-16	114	9	127	Template reloc
2020	5	8	0	38	39.71	38.0244	22.9441	6.72	n/a	2	2020-05-08-00-38-39	2020-04-03-09-36-54	6	1	79	Detection relocated
2020	5	8	0	40	53.56	38.0441	22.9385	2.58	-0.3	2	2020-05-08-00-40-53	2020-05-09-00-00-51	48	1	72	Detection relocated
2020	5	8	0	49	2.09	38.0164	22.9608	6.76	n/a	2	2020-05-08-00-49-02	2020-05-09-05-42-20	6	1	84	Detection relocated
2020	5	8	1	9	21.79	38.0163	22.9458	5.48	0.5	2	2020-05-08-01-09-21	2020-05-05-15-58-58	6	1	26	Detection relocated
2020	5	8	1	22	40.96	38.0353	22.9577	5.81	-0.1	2	2020-05-08-01-22-40	2020-07-07-13-00-03	6	1	26	Detection relocated
2020	5	8	1	27	38.42	38.0293	22.9367	4.91	0.9	2	2020-05-08-01-27-38	2020-05-07-20-44-44	110	1	73	Detection relocated
2020	5	8	1	29	56.04	38.0387	22.9515	4.98	0	2	2020-05-08-01-29-56	2020-05-23-21-32-47	110	1	73	Detection relocated
2020	5	8	1	41	42.83	38.0381	22.9628	6.55	n/a	2	2020-05-08-01-41-42	2020-04-13-13-58-38	6	1	84	Detection relocated
2020	5	8	1	53	1.21	38.0379	22.9417	4.94	0.7	2	2020-05-08-01-53-01	2020-05-07-20-44-44	110	1	73	Detection relocated
2020	5	8	2	47	3.78	38.0332	22.9379	4.97	1.3	2	2020-05-08-02-47-03	2020-05-07-20-44-44	110	1	73	Detection relocated
2020	5	8	2	53	48.75	38.0404	22.9447	4.87	-0.2	2	2020-05-08-02-53-48	2020-05-07-20-44-44	110	1	73	Detection relocated
2020	5	8	3	12	3.72	38.0443	22.9432	5.13	-0.3	2	2020-05-08-03-12-03	2020-05-09-21-51-05	48	1	136	Detection relocated
2020	5	8	3	46	4.21	38.0298	22.9295	5.31	n/a	2	2020-05-08-03-46-04	2020-05-09-21-51-05	48	1	136	Detection relocated
2020	5	8	4	0	23.23	38.0144	22.9373	7.26	n/a	2	2020-05-08-04-00-23	2020-07-06-19-54-03	6	1	9	Detection relocated
2020	5	8	4	43	52.29	38.1742	22.6593	13.28	1.1	2	2020-05-08-04-43-52	2020-03-21-23-25-28	57	9	82	Detection relocated
2020	5	8	4	44	1.6	38.0232	22.9545	6.81	n/a	2	2020-05-08-04-44-01	2020-04-03-09-36-54	6	1	79	Detection relocated
2020	5	8	7	8	56.51	38.0168	22.9586	7.63	-0.3	2	2020-05-08-07-08-56	2020-05-30-13-03-30	6	1	92	Detection relocated
2020	5	8	7	40	5.2	38.0598	22.9422	4.69	0.5	2	2020-05-08-07-40-05	2020-06-04-02-42-43	115	1	76	Detection relocated
2020	5	8	7	49	58.37	38.0482	22.9551	5.78	-0.3	2	2020-05-08-07-49-58	2020-05-23-15-08-57	6	1	26	Detection relocated
2020	5	8	8	58	11.8	38.0422	22.9381	5.2	-0.2	2	2020-05-08-08-58-11	2020-05-09-21-51-05	48	1	136	Detection relocated
2020	5	8	9	3	25.17	38.0349	22.9435	5.89	1.2	2	2020-05-08-09-03-25	2020-05-06-17-51-00	48	1	76	Detection relocated
2020	5	8	9	15	4.77	38.0677	22.9348	8.43	n/a	2	2020-05-08-09-15-04	2020-05-18-06-05-04	6	2	24	Detection relocated
2020	5	8	9	18	20.85	38.033	22.9601	5.64	0.8	2	2020-05-08-09-18-20	2020-05-20-19-34-43	6	1	26	Detection relocated
2020	5	8	10	28	9.33	38.0484	22.9514	4.73	n/a	2	2020-05-08-10-28-09	2020-05-06-07-08-46	6	1	73	Detection relocated
2020	5	8	11	4	32.5	38.0327	22.9436	5.71	0	2	2020-05-08-11-04-32	2020-05-07-02-14-28	6	1	26	Detection relocated
2020	5	8	12	15	23.03	38.0408	22.9675	6.56	0.1	2	2020-05-08-12-15-23	2020-04-13-13-58-38	6	1	84	Detection relocated
2020	5	8	12	47	26.08	38.0461	22.9458	2.8	0	2	2020-05-08-12-47-26	2020-05-09-00-00-51	48	1	72	Detection relocated
2020	5	8	13	12	24.7	38.0446	22.9416	2.64	-0.2	2	2020-05-08-13-12-24	2020-05-09-00-00-51	48	1	72	Detection relocated
2020	5	8	13	36	4.5	38.0522	22.944	6.01	n/a	2	2020-05-08-13-36-04	2020-05-15-23-58-16	48	1	105	Detection relocated
2020	5	8	13	38	55.02	38.0418	22.9627	5.85	n/a	2	2020-05-08-13-38-54	2020-05-23-15-08-57	6	1	26	Detection relocated
2020	5	8	13	39	1.65	38.0395	22.9524	4.74	0.1	2	2020-05-08-13-39-01	2020-05-26-20-10-03	6	1	110	Detection relocated
2020	5	8	13	42	55.27	38.0466	22.9496	5.78	0	2	2020-05-08-13-42-55	2020-05-23-15-08-57	6	1	26	Detection relocated
2020	5	8	13	50	18.08	38.0389	22.935	5.2	1.1	2	2020-05-08-13-50-18	2020-05-09-21-51-05	48	1	136	Detection relocated
2020	5	8	13	54	50.08	38.0602	22.9435	4.73	0.3	2	2020-05-08-13-54-50	2020-06-04-02-42-43	115	1	76	Detection relocated
2020	5	8	14	25	15.45	38.0422	22.9403	2.85	-0.2	2	2020-05-08-14-25-15	2020-05-09-00-00-51	48	1	72	Detection relocated
2020	5	8	14	31	41.9	38.0364	22.9444	5.9	1.4	2	2020-05-08-14-31-41	2020-05-06-17-51-00	48	1	76	Detection relocated
2020	5	8	14	49	18.17	38.0442	22.941	2.61	0.3	2	2020-05-08-14-49-18	2020-05-09-00-00-51	48	1	72	Detection relocated
2020	5	8	15	16	0.290001	38.0302	22.9403	5.9	1	2	2020-05-08-15-16-00	2020-05-06-17-51-00	48	1	76	Detection relocated
2020	5	8	15	31	34.67	38.0466	22.9476	2.86	0.1	2	2020-05-08-15-31-34	2020-05-09-00-00-51	48	1	72	Detection relocated
2020	5	8	15	57	13.65	38.0436	22.9403	2.55	-0.4	2	2020-05-08-15-57-13	2020-05-09-00-00-51	48	1	72	Detection relocated
2020	5	8	16	9	23.81	38.0754	22.9419	8.46	n/a	2	2020-05-08-16-09-23	2020-05-15-01-51-57	6	2	9	Detection relocated
2020	5	8	17	41	10.8	38.0459	22.9449	2.78	-0.1	2	2020-05-08-17-41-10	2020-05-09-00-00-51	48	1	72	Detection relocated
2020	5	8	18	18	44.02	38.0472	22.9477	3.14	0.8	2	2020-05-08-18-18-44	2020-05-09-00-00-51	48	1	72	Detection relocated
2020	5	8	18	30	27.56	38.0366	22.9386	5.13	0.8	2	2020-05-08-18-30-27	2020-05-07-20-44-44	110	1	73	Detection relocated
2020	5	8	18	41	46.64	38.0467	22.948	2.87	0	2	2020-05-08-18-41-46	2020-05-09-00-00-51	48	1	72	Detection relocated
2020	5	8	18	55	44.3	38.0662	22.9624	4.02	-0.2	2	2020-05-08-18-55-44	2020-05-24-18-51-53	6	1	142	Detection relocated
2020	5	8	19	58	41.44	38.0486	22.9468	5.29	-0.3	2	2020-05-08-19-58-41	2020-05-08-20-45-23	6	1	26	Detection relocated
2020	5	8	20	10	58.68	38.0486	22.9532	3.06	0.2	2	2020-05-08-20-10-58	2020-05-09-00-00-51	48	1	72	Detection relocated
2020	5	8	20	16	41.28	38.0414	22.9359	2.33	-0.1	2	2020-05-08-20-16-41	2020-05-09-00-00-51	48	1	72	Detection relocated
2020	5	8	20	21	28.3	38.0288	22.9673	6.72	0.1	2	2020-05-08-20-21-28	2020-05-09-05-42-20	6	1	84	Detection relocated
2020	5	8	20	22	13.84	38.0463	22.9457	2.83	0.7	2	2020-05-08-20-22-13	2020-05-09-00-00-51	48	1	72	Detection relocated
2020	5	8	20	24	38.72	38.045	22.9437	2.69	-0.3	2	2020-05-08-20-24-38	2020-05-09-00-00-51	48	1	72	Detection relocated
2020	5	8	20	40	23.846	38.0551	22.948	8.74	1.4	1	2020-05-08-20-40-24	2020-05-08-20-40-24	6	2	56	Template reloc
2020	5	8	20	45	23.571	38.0404	22.9541	5.8	1.2	1	2020-05-08-20-45-23	2020-05-08-20-45-23	6	1	26	Template reloc
2020	5	8	21	52	6.92	38.0449	22.943	2.68	0.5	2	2020-05-08-21-52-06	2020-05-09-00-00-51	48	1	72	Detection relocated
2020	5	8	21	53	54.8	38.0479	22.9522	3	n/a	2	2020-05-08-21-53-54	2020-05-09-00-00-51	48	1	72	Detection relocated
2020	5	8	22	51	17.08	38.0155	22.9965	5.38	0.8	2	2020-05-08-22-51-17	2020-04-25-18-45-56	77	1	103	Detection relocated
2020	5	8	23	23	25.84	38.0163	22.9608	6.81	-0.3	2	2020-05-08-23-23-25	2020-05-09-05-42-20	6	1	84	Detection relocated
2020	5	8	23	37	7.24	38.0539	22.9242	7.04	n/a	2	2020-05-08-23-37-07	2020-07-08-12-31-35	6	2	51	Detection relocated
2020	5	8	23	51	34.92	38.0475	22.951	2.95	n/a	2	2020-05-08-23-51-34	2020-05-09-00-00-51	48	1	72	Detection relocated
2020	5	9	0	0	49.598	38.0459	22.9449	2.78	1.4	1	2020-05-09-00-00-51	2020-05-09-00-00-51	48	1	72	Template reloc
2020	5	9	0	1	55.39	38.0429	22.9374	2.47	n/a	2	2020-05-09-00-01-55	2020-05-09-00-00-51	48	1	72	Detection relocated
2020	5	9	0	5	16.02	38.047	22.9461	2.92	0.6	2	2020-05-09-00-05-16	2020-05-09-00-00-51	48	1	72	Detection relocated
2020	5	9	0	32	44.37	38.0292	22.9589	5.15	1	2	2020-05-09-00-32-44	2020-07-05-01-42-53	6	1	73	Detection relocated
2020	5	9	0	39	12.39	38.0299	22.9399	4.76	0	2	2020-05-09-00-39-12	2020-05-07-20-44-44	110	1	73	Detection relocated
2020	5	9	1	4	34.99	38.038	22.9649	5.47	0.2	2	2020-05-09-01-04-34	2020-05-05-15-58-58	6	1	26	Detection relocated
2020	5	9	1	27	18.11	38.0406	22.9521	6.22	-0.1	2	2020-05-09-01-27-18	2020-04-04-01-45-18	6	1	79	Detection relocated
2020	5	9	1	45	32.63	38.0475	22.9499	2.95	-0.3	2	2020-05-09-01-45-32	2020-05-09-00-00-51	48	1	72	Detection relocated
2020	5	9	1	45	55.64	38.0457	22.9442	3.06	-0.2	2	2020-05-09-01-45-55	2020-05-09-00-00-51	48	1	72	Detection relocated
2020	5	9	2	13	6.88	38.0256	22.967	6.85	0.8	2	2020-05-09-02-13-06	2020-05-09-05-42-20	6	1	84	Detection relocated
2020	5	9	2	14	0.510002	38.0264	22.9669	6.84	1.2	2	2020-05-09-02-14-00	2020-05-09-05-42-20	6	1	84	Detection relocated
2020	5	9	2	16	54.4	38.0252	22.9671	6.8	0.6	2	2020-05-09-02-16-54	2020-05-09-05-42-20	6	1	84	Detection relocated
2020	5	9	2	22	32.2	38.0277	22.9707	6.82	0	2	2020-05-09-02-22-32	2020-05-09-05-42-20	6	1	84	Detection relocated
2020	5	9	2	32	15.1	38.0199	22.9647	6.84	0.3	2	2020-05-09-02-32-15	2020-05-09-05-42-20	6	1	84	Detection relocated
2020	5	9	2	32	39.66	38.045	22.9634	6.28	-0.2	2	2020-05-09-02-32-39	2020-04-04-01-45-18	6	1	79	Detection relocated
2020	5	9	2	52	29.91	38.033	22.9838	6.63	-0.2	2	2020-05-09-02-52-29	2020-05-09-05-42-20	6	1	84	Detection relocated
2020	5	9	3	34	22.85	38.0463	22.9526	5.16	n/a	2	2020-05-09-03-34-22	2020-05-10-01-14-50	48	1	143	Detection relocated
2020	5	9	3	34	30.73	38.0445	22.9418	2.84	n/a	2	2020-05-09-03-34-30	2020-05-09-00-00-51	48	1	72	Detection relocated
2020	5	9	3	38	2.35	38.0074	22.946	6.42	n/a	2	2020-05-09-03-38-02	2020-05-09-05-42-20	6	1	84	Detection relocated
2020	5	9	3	45	24.98	38.0365	22.9334	5.25	-0.3	2	2020-05-09-03-45-24	2020-05-09-21-51-05	48	1	136	Detection relocated
2020	5	9	3	47	19.56	38.0408	22.9352	2.27	0.4	2	2020-05-09-03-47-19	2020-05-09-00-00-51	48	1	72	Detection relocated
2020	5	9	3	47	58.63	38.0225	22.948	5.51	-0.1	2	2020-05-09-03-47-58	2020-05-07-02-14-28	6	1	26	Detection relocated
2020	5	9	3	48	53.81	37.9943	22.971	8.97	n/a	2	2020-05-09-03-48-53	2020-07-07-13-29-46	6	1	42	Detection relocated
2020	5	9	3	51	39.278	38.0396	22.9212	15.45	1.4	1	2020-05-09-03-51-39	2020-05-09-03-51-39	48	3	143	Template reloc
2020	5	9	3	59	24.29	38.0478	22.9508	2.98	0	2	2020-05-09-03-59-24	2020-05-09-00-00-51	48	1	72	Detection relocated
2020	5	9	4	7	6.37	38.0413	22.9378	5.33	0.7	2	2020-05-09-04-07-06	2020-05-10-01-14-50	48	1	143	Detection relocated
2020	5	9	4	21	18.17	37.9985	22.9806	8.95	n/a	2	2020-05-09-04-21-18	2020-07-07-13-29-46	6	1	42	Detection relocated
2020	5	9	5	10	57.12	38.0262	22.9668	6.87	0.9	2	2020-05-09-05-10-57	2020-05-09-05-42-20	6	1	84	Detection relocated
2020	5	9	5	29	10.88	38.0265	22.9714	6.74	0.5	2	2020-05-09-05-29-10	2020-05-09-05-42-20	6	1	84	Detection relocated
2020	5	9	5	42	19.767	38.0248	22.9667	6.84	1.9	1	2020-05-09-05-42-20	2020-05-09-05-42-20	6	1	84	Template reloc
2020	5	9	5	43	11.56	38.0032	22.9611	6.29	n/a	2	2020-05-09-05-43-11	2020-04-03-09-36-54	6	1	79	Detection relocated
2020	5	9	5	43	34.94	38.0216	22.9584	6.79	0.4	2	2020-05-09-05-43-34	2020-05-09-05-42-20	6	1	84	Detection relocated
2020	5	9	5	43	55.44	38.0175	22.9793	6.44	0.3	2	2020-05-09-05-43-55	2020-05-09-05-42-20	6	1	84	Detection relocated
2020	5	9	5	44	17.39	38.0265	22.9663	6.88	0	2	2020-05-09-05-44-17	2020-05-09-05-42-20	6	1	84	Detection relocated
2020	5	9	5	46	18.93	38.0413	22.9528	6.24	n/a	2	2020-05-09-05-46-18	2020-04-04-01-45-18	6	1	79	Detection relocated
2020	5	9	5	47	47.08	38.0307	22.9674	6.87	-0.1	2	2020-05-09-05-47-47	2020-05-09-05-42-20	6	1	84	Detection relocated
2020	5	9	5	48	46.86	38.0015	22.9619	5.99	0	2	2020-05-09-05-48-46	2020-05-09-05-42-20	6	1	84	Detection relocated
2020	5	9	5	49	53.55	38.0276	22.9569	6.81	-0.1	2	2020-05-09-05-49-53	2020-04-13-13-58-38	6	1	84	Detection relocated
2020	5	9	5	54	11.4	38.0174	22.9614	6.7	0.6	2	2020-05-09-05-54-11	2020-05-09-05-42-20	6	1	84	Detection relocated
2020	5	9	5	55	25.34	38.0364	22.9905	6.58	-0.5	2	2020-05-09-05-55-25	2020-05-09-05-42-20	6	1	84	Detection relocated
2020	5	9	6	13	15.51	38.036	22.9444	5.88	0.8	2	2020-05-09-06-13-15	2020-05-06-17-51-00	48	1	76	Detection relocated
2020	5	9	6	20	55.65	38.0398	22.953	5.82	0.4	2	2020-05-09-06-20-55	2020-05-06-17-51-00	48	1	76	Detection relocated
2020	5	9	6	44	13.63	38.007	22.9694	6.47	0	2	2020-05-09-06-44-13	2020-05-09-05-42-20	6	1	84	Detection relocated
2020	5	9	6	52	16.56	38.033	22.9763	6.71	0.4	2	2020-05-09-06-52-16	2020-05-09-05-42-20	6	1	84	Detection relocated
2020	5	9	6	52	54.73	38.0197	22.9662	6.79	1.1	2	2020-05-09-06-52-54	2020-05-09-05-42-20	6	1	84	Detection relocated
2020	5	9	6	57	27.36	38.0204	22.9773	6.61	0.1	2	2020-05-09-06-57-27	2020-05-09-05-42-20	6	1	84	Detection relocated
2020	5	9	7	1	42.71	38.0428	22.9577	6.24	n/a	2	2020-05-09-07-01-42	2020-04-04-01-45-18	6	1	79	Detection relocated
2020	5	9	7	3	7.67	38.0437	22.9406	2.56	-0.6	2	2020-05-09-07-03-07	2020-05-09-00-00-51	48	1	72	Detection relocated
2020	5	9	7	12	28.07	38.0303	22.9619	6.96	n/a	2	2020-05-09-07-12-28	2020-05-09-05-42-20	6	1	84	Detection relocated
2020	5	9	7	42	29.98	38.0403	22.9609	6.53	-0.3	2	2020-05-09-07-42-29	2020-04-13-13-58-38	6	1	84	Detection relocated
2020	5	9	7	44	26.2	38.0546	22.9379	7.44	0	2	2020-05-09-07-44-26	2020-05-18-08-23-46	6	2	56	Detection relocated
2020	5	9	7	51	5.06	38.059	22.921	7.02	-0.2	2	2020-05-09-07-51-05	2020-05-15-15-41-15	6	2	51	Detection relocated
2020	5	9	8	0	22.25	38.0428	22.938	5.65	-0.3	2	2020-05-09-08-00-22	2020-05-23-15-08-57	6	1	26	Detection relocated
2020	5	9	8	1	34.27	38.0231	22.9666	6.82	1.4	2	2020-05-09-08-01-34	2020-05-09-05-42-20	6	1	84	Detection relocated
2020	5	9	8	2	44.48	38.0109	22.9881	4.66	1.8	1	2020-05-09-08-02-44	2020-05-09-08-02-44	6	1	84	Template reloc
2020	5	9	8	11	5.12	38.0332	22.9667	6.77	n/a	2	2020-05-09-08-11-05	2020-04-03-09-36-54	6	1	79	Detection relocated
2020	5	9	8	22	28.45	38.0108	22.9554	4.32	-0.3	2	2020-05-09-08-22-28	2020-05-03-09-56-04	6	1	26	Detection relocated
2020	5	9	8	45	20.71	38.0138	22.9594	6.83	-0.2	2	2020-05-09-08-45-20	2020-05-09-05-42-20	6	1	84	Detection relocated
2020	5	9	8	53	30.06	38.0231	22.9648	6.83	1.2	2	2020-05-09-08-53-30	2020-05-09-05-42-20	6	1	84	Detection relocated
2020	5	9	9	1	52.68	38.0434	22.9583	6.26	-0.2	2	2020-05-09-09-01-52	2020-04-04-01-45-18	6	1	79	Detection relocated
2020	5	9	9	19	23.69	38.0427	22.9732	6.16	-0.2	2	2020-05-09-09-19-23	2020-04-04-01-45-18	6	1	79	Detection relocated
2020	5	9	9	24	36.8	38.0245	22.973	6.76	-0.5	2	2020-05-09-09-24-36	2020-05-09-05-42-20	6	1	84	Detection relocated
2020	5	9	9	49	33.03	38.0425	22.938	2.44	-0.2	2	2020-05-09-09-49-33	2020-05-09-00-00-51	48	1	72	Detection relocated
2020	5	9	10	2	55.29	38.0576	22.9571	4.6	n/a	2	2020-05-09-10-02-55	2020-05-06-07-08-46	6	1	73	Detection relocated
2020	5	9	10	7	6.83	38.043	22.9405	5.46	n/a	2	2020-05-09-10-07-06	2020-05-15-23-58-16	48	1	105	Detection relocated
2020	5	9	10	13	12.5	38.0155	22.9446	7.12	0	2	2020-05-09-10-13-12	2020-07-01-10-56-34	6	1	42	Detection relocated
2020	5	9	10	27	12.79	38.0489	22.9477	5.67	n/a	2	2020-05-09-10-27-12	2020-05-14-21-14-15	6	1	142	Detection relocated
2020	5	9	11	3	38.66	38.0643	22.9406	7.71	1.1	2	2020-05-09-11-03-38	2020-05-18-06-05-04	6	2	24	Detection relocated
2020	5	9	11	15	7.18	38.043	22.956	6.25	0.2	2	2020-05-09-11-15-07	2020-04-04-01-45-18	6	1	79	Detection relocated
2020	5	9	11	23	38.92	38.0467	22.9381	4.66	0.9	2	2020-05-09-11-23-38	2020-07-09-16-02-50	48	1	76	Detection relocated
2020	5	9	11	25	25.54	38.0541	22.9359	7.67	0.5	2	2020-05-09-11-25-25	2020-05-15-22-57-01	6	2	71	Detection relocated
2020	5	9	11	33	47.93	38.0435	22.9391	5.4	0.3	2	2020-05-09-11-33-47	2020-05-10-01-14-50	48	1	143	Detection relocated
2020	5	9	11	35	31.67	38.0297	22.9564	7.24	n/a	2	2020-05-09-11-35-31	2020-04-03-09-36-54	6	1	79	Detection relocated
2020	5	9	11	37	2.98	38.069	22.9287	5.33	-0.3	2	2020-05-09-11-37-02	2020-05-20-22-40-34	6	2	42	Detection relocated
2020	5	9	11	47	49.02	38.0365	22.9414	4.9	-0.5	2	2020-05-09-11-47-49	2020-05-07-20-44-44	110	1	73	Detection relocated
2020	5	9	12	14	44.7	38.0274	22.9586	5.79	2.4	1	2020-05-09-12-14-45	2020-05-09-12-14-45	6	1	18	Template reloc
2020	5	9	12	22	34.19	38.0449	22.9497	5.27	-0.3	2	2020-05-09-12-22-34	2020-05-10-01-14-50	48	1	143	Detection relocated
2020	5	9	12	29	56.21	38.0465	22.9471	2.84	-0.1	2	2020-05-09-12-29-56	2020-05-09-00-00-51	48	1	72	Detection relocated
2020	5	9	13	9	25.06	38.0505	22.961	3.24	-0.6	2	2020-05-09-13-09-25	2020-05-09-00-00-51	48	1	72	Detection relocated
2020	5	9	13	18	31.93	38.0404	22.9362	5.4	0.5	2	2020-05-09-13-18-31	2020-05-15-23-58-16	48	1	105	Detection relocated
2020	5	9	13	19	3.38	38.0471	22.9469	5.71	0.5	2	2020-05-09-13-19-03	2020-05-15-23-58-16	48	1	105	Detection relocated
2020	5	9	13	32	24.926	38.1345	22.684	15.46	1.9	1	2020-05-09-13-32-25	2020-05-09-13-32-25	112	8	138	Template reloc
2020	5	9	13	56	33	38.0434	22.9773	6.13	0.1	2	2020-05-09-13-56-32	2020-04-04-01-45-18	6	1	79	Detection relocated
2020	5	9	13	57	12.62	38.0456	22.9462	5.13	-0.5	2	2020-05-09-13-57-12	2020-05-09-21-51-05	48	1	136	Detection relocated
2020	5	9	14	11	17.89	38.0149	22.996	5.36	1	2	2020-05-09-14-11-17	2020-04-25-18-45-56	77	1	103	Detection relocated
2020	5	9	14	19	0.150002	38.0628	22.9405	7.7	0.7	2	2020-05-09-14-19-00	2020-05-18-06-05-04	6	2	24	Detection relocated
2020	5	9	14	20	31.04	38.0362	22.9379	6.43	0.9	2	2020-05-09-14-20-31	2020-05-07-02-14-28	6	1	26	Detection relocated
2020	5	9	15	39	15.91	38.0448	22.9404	5.21	n/a	2	2020-05-09-15-39-15	2020-05-09-21-51-05	48	1	136	Detection relocated
2020	5	9	16	18	55.51	38.1218	22.6863	15.4	0.8	2	2020-05-09-16-18-55	2020-05-09-13-32-25	112	8	138	Detection relocated
2020	5	9	16	19	13.75	38.0415	22.9364	2.34	-0.5	2	2020-05-09-16-19-13	2020-05-09-00-00-51	48	1	72	Detection relocated
2020	5	9	16	30	6.62	38.0402	22.9362	5.23	n/a	2	2020-05-09-16-30-06	2020-05-09-21-51-05	48	1	136	Detection relocated
2020	5	9	16	36	33.17	38.0503	22.9561	4.63	1.1	2	2020-05-09-16-36-33	2020-05-06-07-08-46	6	1	73	Detection relocated
2020	5	9	16	49	5.71	38.0265	22.9674	6.84	n/a	2	2020-05-09-16-49-05	2020-05-09-05-42-20	6	1	84	Detection relocated
2020	5	9	17	1	11.6	38.0405	22.9787	6.42	0.1	2	2020-05-09-17-01-11	2020-04-13-13-58-38	6	1	84	Detection relocated
2020	5	9	17	17	36.74	38.0452	22.9437	2.84	0.8	2	2020-05-09-17-17-36	2020-05-09-00-00-51	48	1	72	Detection relocated
2020	5	9	17	31	21.96	38.0609	22.9223	11.42	0	2	2020-05-09-17-31-21	2020-04-28-02-43-29	55	2	48	Detection relocated
2020	5	9	17	33	58.64	38.0469	22.9487	2.88	-0.3	2	2020-05-09-17-33-58	2020-05-09-00-00-51	48	1	72	Detection relocated
2020	5	9	17	45	12.12	38.0359	22.9325	5.32	n/a	2	2020-05-09-17-45-12	2020-05-15-23-58-16	48	1	105	Detection relocated
2020	5	9	17	56	29.52	38.0424	22.9487	4.76	-0.3	2	2020-05-09-17-56-29	2020-05-10-01-14-50	48	1	143	Detection relocated
2020	5	9	18	21	18.86	38.1433	22.676	15.16	0.7	2	2020-05-09-18-21-18	2020-05-09-13-32-25	112	8	138	Detection relocated
2020	5	9	18	30	53.8	38.0456	22.9427	2.74	-0.5	2	2020-05-09-18-30-53	2020-05-09-00-00-51	48	1	72	Detection relocated
2020	5	9	18	48	9.12	38.0378	22.932	2	-0.4	2	2020-05-09-18-48-09	2020-05-09-00-00-51	48	1	72	Detection relocated
2020	5	9	19	42	3.4	38.0662	22.961	4.01	n/a	2	2020-05-09-19-42-03	2020-05-24-18-51-53	6	1	142	Detection relocated
2020	5	9	19	42	37.78	38.0504	22.936	7.59	0.5	2	2020-05-09-19-42-37	2020-05-15-22-57-01	6	2	71	Detection relocated
2020	5	9	20	14	34.2	38.038	22.9735	5.53	-0.4	2	2020-05-09-20-14-34	2020-05-05-15-58-58	6	1	26	Detection relocated
2020	5	9	20	17	48.92	38.0212	22.9444	6	0.7	2	2020-05-09-20-17-48	2020-07-04-12-55-18	6	1	141	Detection relocated
2020	5	9	20	45	32.28	38.0402	22.9384	5.29	0.8	2	2020-05-09-20-45-32	2020-05-10-01-14-50	48	1	143	Detection relocated
2020	5	9	21	4	11.92	38.0431	22.9572	6.24	0.9	2	2020-05-09-21-04-11	2020-04-04-01-45-18	6	1	79	Detection relocated
2020	5	9	21	4	52.36	38.0482	22.9475	5.65	0.4	2	2020-05-09-21-04-52	2020-05-22-15-32-38	6	1	141	Detection relocated
2020	5	9	21	45	37.1	38.0279	22.9394	5.8	-0.2	2	2020-05-09-21-45-37	2020-05-06-17-51-00	48	1	76	Detection relocated
2020	5	9	21	51	5.388	38.0394	22.9351	5.25	1.1	1	2020-05-09-21-51-05	2020-05-09-21-51-05	48	1	136	Template reloc
2020	5	9	22	27	47.24	38.0584	22.9208	7.02	-0.2	2	2020-05-09-22-27-47	2020-05-15-15-41-15	6	2	51	Detection relocated
2020	5	9	22	44	22.68	38.0458	22.9451	2.77	-0.4	2	2020-05-09-22-44-22	2020-05-09-00-00-51	48	1	72	Detection relocated
2020	5	9	22	58	21.96	38.0343	22.943	5.89	1.2	2	2020-05-09-22-58-21	2020-05-06-17-51-00	48	1	76	Detection relocated
2020	5	9	23	10	58.72	38.0436	22.9395	2.54	-0.5	2	2020-05-09-23-10-58	2020-05-09-00-00-51	48	1	72	Detection relocated
2020	5	9	23	25	23.6	38.0451	22.9454	5.18	-0.8	2	2020-05-09-23-25-23	2020-05-09-21-51-05	48	1	136	Detection relocated
2020	5	9	23	27	57.16	38.0652	22.9444	4.13	0.1	2	2020-05-09-23-27-57	2020-05-24-18-51-53	6	1	142	Detection relocated
2020	5	9	23	31	54.52	38.0719	22.9413	5.75	n/a	2	2020-05-09-23-31-54	2020-05-20-22-40-34	6	2	42	Detection relocated
2020	5	9	23	34	7.36	38.0473	22.9517	5.79	n/a	2	2020-05-09-23-34-07	2020-05-23-15-08-57	6	1	26	Detection relocated
2020	5	10	0	0	13.32	38.0487	22.9472	7.96	0.7	2	2020-05-10-00-00-13	2020-05-19-18-24-04	6	1	9	Detection relocated
2020	5	10	0	0	49.22	38.0379	22.9655	5.63	-0.6	2	2020-05-10-00-00-49	2020-05-05-15-58-58	6	1	26	Detection relocated
2020	5	10	0	5	49.22	38.0508	22.9559	5.95	n/a	2	2020-05-10-00-05-49	2020-05-23-15-08-57	6	1	26	Detection relocated
2020	5	10	0	14	49.24	38.0451	22.9426	2.7	-0.4	2	2020-05-10-00-14-49	2020-05-09-00-00-51	48	1	72	Detection relocated
2020	5	10	0	48	46.33	38.1391	22.6834	15.59	0.7	2	2020-05-10-00-48-46	2020-05-09-13-32-25	112	8	138	Detection relocated
2020	5	10	1	2	14.81	38.0471	22.943	5.72	n/a	2	2020-05-10-01-02-14	2020-05-22-15-32-38	6	1	141	Detection relocated
2020	5	10	1	14	49.564	38.0414	22.9386	5.31	1.7	1	2020-05-10-01-14-50	2020-05-10-01-14-50	48	1	143	Template reloc
2020	5	10	1	22	47.09	38.042	22.955	5.11	1.1	2	2020-05-10-01-22-47	2020-05-12-01-36-53	6	1	26	Detection relocated
2020	5	10	1	25	51.74	38.0463	22.9483	5.55	-0.3	2	2020-05-10-01-25-51	2020-05-15-23-58-16	48	1	105	Detection relocated
2020	5	10	1	41	36.88	38.0467	22.9707	6.26	n/a	2	2020-05-10-01-41-36	2020-04-04-01-45-18	6	1	79	Detection relocated
2020	5	10	1	59	55.51	38.0409	22.9384	5.4	0.1	2	2020-05-10-01-59-55	2020-05-15-23-58-16	48	1	105	Detection relocated
2020	5	10	2	9	40.78	38.0526	22.9396	7.55	0.9	2	2020-05-10-02-09-40	2020-06-02-00-19-43	6	2	26	Detection relocated
2020	5	10	2	29	17.57	38.0321	22.933	5.52	0.2	2	2020-05-10-02-29-17	2020-05-23-15-08-57	6	1	26	Detection relocated
2020	5	10	2	33	23.41	38.0346	22.9404	7.76	0.7	2	2020-05-10-02-33-23	2020-05-19-18-24-04	6	1	9	Detection relocated
2020	5	10	2	34	22.21	38.0371	22.991	5.79	n/a	2	2020-05-10-02-34-22	2020-04-23-06-19-30	77	1	103	Detection relocated
2020	5	10	3	12	2.17	38.0377	22.9416	7.56	0.8	2	2020-05-10-03-12-02	2020-07-04-02-02-37	6	1	9	Detection relocated
2020	5	10	4	13	10.77	38.0343	22.9577	5.82	-0.4	2	2020-05-10-04-13-10	2020-07-04-12-55-18	6	1	141	Detection relocated
2020	5	10	4	14	32.88	38.0401	22.9429	7.42	-0.5	2	2020-05-10-04-14-32	2020-07-04-02-02-37	6	1	9	Detection relocated
2020	5	10	4	36	33.49	38.0587	22.9472	7.83	-0.4	2	2020-05-10-04-36-33	2020-05-15-22-57-01	6	2	71	Detection relocated
2020	5	10	5	4	30.9	38.076	22.9357	7.83	n/a	2	2020-05-10-05-04-30	2020-05-19-05-59-16	6	2	56	Detection relocated
2020	5	10	6	18	7.37	38.0675	22.9333	7.01	n/a	2	2020-05-10-06-18-07	2020-05-19-05-59-16	6	2	56	Detection relocated
2020	5	10	6	22	13.74	38.0095	22.9645	6.55	n/a	2	2020-05-10-06-22-13	2020-05-09-05-42-20	6	1	84	Detection relocated
2020	5	10	6	36	48.41	38.0429	22.9421	3.69	n/a	2	2020-05-10-06-36-48	2020-05-10-01-14-50	48	1	143	Detection relocated
2020	5	10	8	5	57.42	38.0453	22.9432	2.71	0.3	2	2020-05-10-08-05-57	2020-05-09-00-00-51	48	1	72	Detection relocated
2020	5	10	8	44	34.4	38.0459	22.9211	7.53	-0.2	2	2020-05-10-08-44-34	2020-05-15-22-57-01	6	2	71	Detection relocated
2020	5	10	8	48	5.78	38.0428	22.9403	5.46	-0.1	2	2020-05-10-08-48-05	2020-05-15-23-58-16	48	1	105	Detection relocated
2020	5	10	9	16	16.04	38.0603	22.924	7.05	n/a	2	2020-05-10-09-16-16	2020-05-15-15-41-15	6	2	51	Detection relocated
2020	5	10	9	22	38.57	38.0534	22.932	7.7	0.9	2	2020-05-10-09-22-38	2020-05-15-22-57-01	6	2	71	Detection relocated
2020	5	10	9	23	35.49	38.0468	22.9481	2.87	-0.3	2	2020-05-10-09-23-35	2020-05-09-00-00-51	48	1	72	Detection relocated
2020	5	10	9	31	38.43	38.0326	22.9669	6.75	-0.1	2	2020-05-10-09-31-38	2020-04-03-09-36-54	6	1	79	Detection relocated
2020	5	10	10	44	5.62	38.0583	22.9318	8.4	n/a	2	2020-05-10-10-44-05	2020-07-08-09-07-13	6	2	47	Detection relocated
2020	5	10	11	53	0.349998	38.062	22.9387	7.67	0.5	2	2020-05-10-11-53-00	2020-05-18-06-05-04	6	2	24	Detection relocated
2020	5	10	12	14	20.97	38.0461	22.9459	2.8	1	2	2020-05-10-12-14-20	2020-05-09-00-00-51	48	1	72	Detection relocated
2020	5	10	12	45	52.23	38.041	22.9355	2.29	-0.3	2	2020-05-10-12-45-52	2020-05-09-00-00-51	48	1	72	Detection relocated
2020	5	10	12	48	15.64	38.0306	22.9584	5.64	0.6	2	2020-05-10-12-48-15	2020-05-20-19-34-43	6	1	26	Detection relocated
2020	5	10	12	57	46.34	38.0131	22.9529	8.61	n/a	2	2020-05-10-12-57-46	2020-07-01-10-38-56	6	1	71	Detection relocated
2020	5	10	13	18	21.86	38.0147	22.9958	5.4	n/a	2	2020-05-10-13-18-21	2020-04-25-18-45-56	77	1	103	Detection relocated
2020	5	10	13	48	12.81	38.0466	22.9441	5.25	0.2	2	2020-05-10-13-48-12	2020-05-09-21-51-05	48	1	136	Detection relocated
2020	5	10	15	41	18.18	38.04	22.9356	5.28	1.1	2	2020-05-10-15-41-18	2020-05-09-21-51-05	48	1	136	Detection relocated
2020	5	10	16	47	16.693	38.1612	22.5788	8.62	1.2	1	2020-05-10-16-47-16	2020-05-10-16-47-16	116	10	144	Template reloc
2020	5	10	17	7	14.88	38.0149	22.9421	4.96	n/a	2	2020-05-10-17-07-14	2020-05-23-21-32-47	110	1	73	Detection relocated
2020	5	10	17	17	24.88	38.042	22.9405	5.16	n/a	2	2020-05-10-17-17-24	2020-05-09-21-51-05	48	1	136	Detection relocated
2020	5	10	18	16	39.78	38.0483	22.9577	5.78	0.2	2	2020-05-10-18-16-39	2020-05-23-15-08-57	6	1	26	Detection relocated
2020	5	10	18	24	51.8	38.022	22.9323	8.28	-0.1	2	2020-05-10-18-24-51	2020-06-08-18-37-23	6	1	15	Detection relocated
2020	5	10	18	33	50.46	38.0133	22.9338	7.29	-0.2	2	2020-05-10-18-33-50	2020-07-04-02-02-37	6	1	9	Detection relocated
2020	5	10	18	35	11.96	38.0514	22.963	5.67	-0.3	2	2020-05-10-18-35-11	2020-05-22-15-32-38	6	1	141	Detection relocated
2020	5	10	18	59	10.96	38.0471	22.9491	5.58	-0.1	2	2020-05-10-18-59-10	2020-05-15-23-58-16	48	1	105	Detection relocated
2020	5	10	19	5	44.22	38.0701	22.9326	5.49	0	2	2020-05-10-19-05-44	2020-05-20-22-40-34	6	2	42	Detection relocated
2020	5	10	19	14	12.3	38.0797	22.927	6.47	1.1	2	2020-05-10-19-14-12	2020-07-06-15-46-49	6	2	42	Detection relocated
2020	5	10	19	17	42.76	38.0808	22.925	6.52	0	2	2020-05-10-19-17-42	2020-07-06-15-46-49	6	2	42	Detection relocated
2020	5	10	19	18	41.8	38.0154	22.9501	5.5	0	2	2020-05-10-19-18-41	2020-05-20-19-34-43	6	1	26	Detection relocated
2020	5	10	19	27	9.28	38.0247	22.9452	5.14	n/a	2	2020-05-10-19-27-09	2020-05-23-21-32-47	110	1	73	Detection relocated
2020	5	10	19	35	34.76	38.0839	22.9437	6.38	-0.4	2	2020-05-10-19-35-34	2020-07-06-15-46-49	6	2	42	Detection relocated
2020	5	10	19	37	14.72	38.0803	22.9267	6.31	0.4	2	2020-05-10-19-37-14	2020-07-06-15-46-49	6	2	42	Detection relocated
2020	5	10	20	13	26.46	38.0467	22.9469	5.58	-0.2	2	2020-05-10-20-13-26	2020-05-15-23-58-16	48	1	105	Detection relocated
2020	5	10	20	35	48.24	38.0434	22.9408	5.48	-0.1	2	2020-05-10-20-35-48	2020-05-15-23-58-16	48	1	105	Detection relocated
2020	5	10	21	15	55.16	38.068	22.9121	7.92	-0.4	2	2020-05-10-21-15-55	2020-05-24-02-51-46	6	2	47	Detection relocated
2020	5	10	21	17	50.36	38.0679	22.9313	7.78	0	2	2020-05-10-21-17-50	2020-05-21-17-47-41	6	2	47	Detection relocated
2020	5	10	21	18	37.96	37.9945	22.9502	8.74	-0.2	2	2020-05-10-21-18-37	2020-07-07-13-29-46	6	1	42	Detection relocated
2020	5	10	22	10	32.86	38.035	22.9493	4.83	n/a	2	2020-05-10-22-10-32	2020-05-12-01-36-53	6	1	26	Detection relocated
2020	5	10	22	20	39.7	38.042	22.9586	5.79	-0.2	2	2020-05-10-22-20-39	2020-05-08-20-45-23	6	1	26	Detection relocated
2020	5	10	22	42	17.32	38.0672	22.9473	7.01	-0.2	2	2020-05-10-22-42-17	2020-05-15-15-41-15	6	2	51	Detection relocated
2020	5	10	22	56	2.56	38.0395	22.9363	5.22	0.4	2	2020-05-10-22-56-02	2020-05-09-21-51-05	48	1	136	Detection relocated
2020	5	10	22	59	58.84	38.0265	22.9965	5.66	n/a	2	2020-05-10-22-59-58	2020-05-23-00-27-47	117	1	145	Detection relocated
2020	5	10	23	23	52	38.0724	22.943	5.83	n/a	2	2020-05-10-23-23-52	2020-05-20-22-40-34	6	2	42	Detection relocated
2020	5	10	23	32	41.16	38.0506	22.9045	11.34	0.2	2	2020-05-10-23-32-41	2020-04-28-02-43-29	55	2	48	Detection relocated
2020	5	10	23	40	52.296	38.0442	22.9751	21.53	1.5	1	2020-05-10-23-40-52	2020-05-10-23-40-52	88	0	146	Template loc
2020	5	10	23	47	4.56	38.0454	22.9826	6.21	n/a	2	2020-05-10-23-47-04	2020-04-04-01-45-18	6	1	79	Detection relocated
2020	5	11	0	47	43.28	38.0483	22.9478	5.69	n/a	2	2020-05-11-00-47-43	2020-05-22-15-32-38	6	1	141	Detection relocated
2020	5	11	0	48	50.24	38.0099	22.9334	7.24	-0.2	2	2020-05-11-00-48-50	2020-07-04-02-02-37	6	1	9	Detection relocated
2020	5	11	1	0	37.46	38.034	22.9447	4.62	-0.4	2	2020-05-11-01-00-37	2020-05-26-20-10-03	6	1	110	Detection relocated
2020	5	11	1	11	32.05	38.0405	22.9384	5.28	-0.2	2	2020-05-11-01-11-32	2020-05-10-01-14-50	48	1	143	Detection relocated
2020	5	11	1	12	22.19	38.0406	22.9605	5.08	n/a	2	2020-05-11-01-12-22	2020-05-12-01-36-53	6	1	26	Detection relocated
2020	5	11	1	20	8.61	37.9935	22.9487	8.68	n/a	2	2020-05-11-01-20-08	2020-07-07-13-29-46	6	1	42	Detection relocated
2020	5	11	1	44	44.34	38.0579	22.9438	7.81	-0.2	2	2020-05-11-01-44-44	2020-05-15-22-57-01	6	2	71	Detection relocated
2020	5	11	1	47	8.1	37.9925	22.9544	8.64	n/a	2	2020-05-11-01-47-08	2020-07-07-13-29-46	6	1	42	Detection relocated
2020	5	11	1	58	54.82	38.0538	22.9369	7.14	1.1	2	2020-05-11-01-58-54	2020-05-12-14-58-08	6	2	54	Detection relocated
2020	5	11	2	7	10.22	38.0389	22.9346	5.25	0.9	2	2020-05-11-02-07-10	2020-05-09-21-51-05	48	1	136	Detection relocated
2020	5	11	2	31	54.28	38.1758	22.6378	11.16	n/a	2	2020-05-11-02-31-54	2020-05-16-10-46-59	118	9	147	Detection relocated
2020	5	11	2	32	13.46	38.0691	22.9262	5.31	-0.1	2	2020-05-11-02-32-13	2020-05-20-22-40-34	6	2	42	Detection relocated
2020	5	11	3	4	38.33	38.0619	22.929	7	0.4	2	2020-05-11-03-04-38	2020-05-15-15-41-15	6	2	51	Detection relocated
2020	5	11	3	22	27.07	38.0712	22.9346	5.63	0.7	2	2020-05-11-03-22-27	2020-05-20-22-40-34	6	2	42	Detection relocated
2020	5	11	3	42	48.64	38.0197	22.9428	8.54	0	2	2020-05-11-03-42-48	2020-05-16-19-57-00	6	1	51	Detection relocated
2020	5	11	3	59	11.34	38.0291	22.9494	7.23	n/a	2	2020-05-11-03-59-11	2020-07-01-10-56-34	6	1	42	Detection relocated
2020	5	11	4	30	30.64	38.0473	22.9517	5.14	0.5	2	2020-05-11-04-30-30	2020-05-09-21-51-05	48	1	136	Detection relocated
2020	5	11	4	50	50.83	38.078	22.929	7.96	n/a	2	2020-05-11-04-50-50	2020-05-19-23-34-33	6	2	47	Detection relocated
2020	5	11	5	2	54.71	38.046	22.9481	5.74	-0.1	2	2020-05-11-05-02-54	2020-05-23-15-08-57	6	1	26	Detection relocated
2020	5	11	5	8	20.64	38.0311	22.9304	5.2	0.9	2	2020-05-11-05-08-20	2020-05-09-21-51-05	48	1	136	Detection relocated
2020	5	11	5	19	7.87	38.0323	22.9511	6.99	n/a	2	2020-05-11-05-19-07	2020-07-07-13-00-03	6	1	26	Detection relocated
2020	5	11	5	41	24.85	38.029	22.9356	5.03	-0.2	2	2020-05-11-05-41-24	2020-05-07-20-44-44	110	1	73	Detection relocated
2020	5	11	5	57	13.96	38.0287	22.9488	5.83	-0.2	2	2020-05-11-05-57-13	2020-07-07-13-00-03	6	1	26	Detection relocated
2020	5	11	5	59	31.26	38.0477	22.9448	5.71	n/a	2	2020-05-11-05-59-31	2020-05-22-15-32-38	6	1	141	Detection relocated
2020	5	11	6	7	50.91	38.0366	22.9877	5.91	0.7	2	2020-05-11-06-07-50	2020-04-23-06-19-30	77	1	103	Detection relocated
2020	5	11	6	19	24.98	38.044	22.9441	7.82	0.7	2	2020-05-11-06-19-24	2020-05-19-18-24-04	6	1	9	Detection relocated
2020	5	11	6	41	24.25	38.0732	22.9354	5.83	-0.4	2	2020-05-11-06-41-24	2020-05-20-22-40-34	6	2	42	Detection relocated
2020	5	11	6	54	4.92	38.0681	22.9254	5.2	-0.3	2	2020-05-11-06-54-04	2020-05-20-22-40-34	6	2	42	Detection relocated
2020	5	11	6	55	32.35	38.049	22.9476	5.68	0.7	2	2020-05-11-06-55-32	2020-05-22-15-32-38	6	1	141	Detection relocated
2020	5	11	7	1	13.95	38.048	22.9509	3	-0.4	2	2020-05-11-07-01-13	2020-05-09-00-00-51	48	1	72	Detection relocated
2020	5	11	7	3	56.09	38.0484	22.9556	2.89	0.2	2	2020-05-11-07-03-56	2020-05-09-00-00-51	48	1	72	Detection relocated
2020	5	11	7	10	47.65	38.0341	22.9425	5.72	0.5	2	2020-05-11-07-10-47	2020-05-07-02-14-28	6	1	26	Detection relocated
2020	5	11	7	15	21.46	38.0426	22.9407	8.03	1.1	2	2020-05-11-07-15-21	2020-05-22-18-58-33	6	1	54	Detection relocated
2020	5	11	7	42	20.97	38.0442	22.9418	7.22	-0.1	2	2020-05-11-07-42-20	2020-05-21-20-42-14	6	2	42	Detection relocated
2020	5	11	7	50	8.65	38.1831	22.5744	13.45	n/a	2	2020-05-11-07-50-08	2020-05-11-11-49-59	75	10	101	Detection relocated
2020	5	11	7	56	7.21	38.0364	22.9597	5.62	0.9	2	2020-05-11-07-56-07	2020-05-05-15-58-58	6	1	26	Detection relocated
2020	5	11	8	7	0.809998	38.0408	22.9402	8.04	n/a	2	2020-05-11-08-07-00	2020-07-06-21-15-22	6	1	9	Detection relocated
2020	5	11	9	54	0.519997	38.0394	22.9488	5.87	0.4	2	2020-05-11-09-54-00	2020-05-06-17-51-00	48	1	76	Detection relocated
2020	5	11	9	55	38.08	38.0459	22.9585	5.6	-0.2	2	2020-05-11-09-55-38	2020-05-06-17-51-00	48	1	76	Detection relocated
2020	5	11	10	8	22	38.0285	22.9399	5.81	0.3	2	2020-05-11-10-08-22	2020-05-06-17-51-00	48	1	76	Detection relocated
2020	5	11	10	15	46.469	38.0101	22.9401	5.73	1.3	1	2020-05-11-10-15-47	2020-05-11-10-15-47	48	1	72	Template reloc
2020	5	11	10	18	13.82	38.0567	22.9341	7.81	n/a	2	2020-05-11-10-18-13	2020-05-18-08-23-46	6	2	56	Detection relocated
2020	5	11	10	41	43.07	38.0472	22.946	5.17	n/a	2	2020-05-11-10-41-43	2020-05-09-21-51-05	48	1	136	Detection relocated
2020	5	11	10	53	56.38	38.0337	22.9537	7.26	n/a	2	2020-05-11-10-53-56	2020-07-01-10-56-34	6	1	42	Detection relocated
2020	5	11	11	3	4.63	38.1655	22.6246	10.51	0.9	2	2020-05-11-11-03-04	2020-05-16-10-46-59	118	9	147	Detection relocated
2020	5	11	11	23	55.87	38.0294	22.9611	7.22	1.4	2	2020-05-11-11-23-55	2020-07-01-10-56-34	6	1	42	Detection relocated
2020	5	11	11	24	18.32	38.0482	22.9444	7.3	1.4	2	2020-05-11-11-24-18	2020-05-21-20-42-14	6	2	42	Detection relocated
2020	5	11	11	46	25.307	38.1776	22.5727	15.32	1.9	1	2020-05-11-11-46-25	2020-05-11-11-46-25	75	9	101	Template reloc
2020	5	11	11	49	59.304	38.1849	22.5751	13.7	2.2	1	2020-05-11-11-49-59	2020-05-11-11-49-59	75	10	101	Template reloc
2020	5	11	11	55	53.11	38.1905	22.5768	13.88	1.1	2	2020-05-11-11-55-53	2020-05-13-00-10-42	75	10	101	Detection relocated
2020	5	11	11	56	51.2	38.1874	22.5758	14.93	n/a	2	2020-05-11-11-56-51	2020-05-11-11-49-59	75	10	101	Detection relocated
2020	5	11	12	14	8.02	38.0456	22.943	7.93	0.4	2	2020-05-11-12-14-08	2020-05-19-18-24-04	6	1	9	Detection relocated
2020	5	11	12	27	48.14	38.0155	22.937	5.69	n/a	2	2020-05-11-12-27-48	2020-05-06-17-51-00	48	1	76	Detection relocated
2020	5	11	12	36	17.11	38.0478	22.944	7.29	1.3	2	2020-05-11-12-36-17	2020-05-21-20-42-14	6	2	42	Detection relocated
2020	5	11	12	38	23.92	38.0713	22.9381	5.67	0	2	2020-05-11-12-38-23	2020-05-20-22-40-34	6	2	42	Detection relocated
2020	5	11	12	41	14.95	38.1345	22.7486	13.24	0.8	2	2020-05-11-12-41-14	2020-05-06-22-46-46	107	8	133	Detection relocated
2020	5	11	12	45	23.72	38.0731	22.9397	5.85	0.1	2	2020-05-11-12-45-23	2020-05-20-22-40-34	6	2	42	Detection relocated
2020	5	11	13	33	1.34	38.0713	22.929	5.56	0	2	2020-05-11-13-33-01	2020-05-20-22-40-34	6	2	42	Detection relocated
2020	5	11	13	38	16.52	37.9961	22.9759	8.92	-0.1	2	2020-05-11-13-38-16	2020-07-07-13-29-46	6	1	42	Detection relocated
2020	5	11	14	2	5.06	38.072	22.9411	5.75	-0.2	2	2020-05-11-14-02-05	2020-05-20-22-40-34	6	2	42	Detection relocated
2020	5	11	14	26	9.84	38.0114	22.9334	7.25	n/a	2	2020-05-11-14-26-09	2020-07-04-02-02-37	6	1	9	Detection relocated
2020	5	11	14	30	34.558	38.062	22.9393	7.02	1.5	1	2020-05-11-14-30-34	2020-05-11-14-30-34	6	2	42	Template reloc
2020	5	11	14	32	29.33	38.0683	22.9258	5.21	-0.2	2	2020-05-11-14-32-29	2020-05-20-22-40-34	6	2	42	Detection relocated
2020	5	11	14	42	6.66	38.071	22.9329	5.58	-0.5	2	2020-05-11-14-42-06	2020-05-20-22-40-34	6	2	42	Detection relocated
2020	5	11	14	44	40.61	38.0165	22.9426	8.5	-0.2	2	2020-05-11-14-44-40	2020-05-16-19-57-00	6	1	51	Detection relocated
2020	5	11	15	52	38.07	38.161	22.6342	12.64	0.8	2	2020-05-11-15-52-37	2020-05-16-08-00-31	118	9	147	Detection relocated
2020	5	11	15	55	38.51	38.0179	22.9481	8.48	n/a	2	2020-05-11-15-55-38	2020-07-01-10-38-56	6	1	71	Detection relocated
2020	5	11	16	6	6.54	37.9968	22.9634	8.79	0.1	2	2020-05-11-16-06-06	2020-07-07-13-29-46	6	1	42	Detection relocated
2020	5	11	16	22	34.04	38.0666	22.9167	4.87	0.3	2	2020-05-11-16-22-34	2020-05-20-22-40-34	6	2	42	Detection relocated
2020	5	11	17	0	6.68	38.0718	22.9397	5.72	0.1	2	2020-05-11-17-00-06	2020-05-20-22-40-34	6	2	42	Detection relocated
2020	5	11	17	6	33.8	38.1768	22.5661	18.11	0.7	2	2020-05-11-17-06-33	2020-04-18-13-25-34	75	9	101	Detection relocated
2020	5	11	17	8	39.8	37.989	22.9629	9.08	0.3	2	2020-05-11-17-08-39	2020-07-07-13-29-46	6	1	42	Detection relocated
2020	5	11	17	11	25.68	38.1882	22.5764	13.03	1.2	2	2020-05-11-17-11-25	2020-05-13-00-10-42	75	10	101	Detection relocated
2020	5	11	17	21	34.34	37.9884	22.9691	8.67	n/a	2	2020-05-11-17-21-34	2020-07-07-13-29-46	6	1	42	Detection relocated
2020	5	11	17	23	28.16	38.0388	22.9458	4.99	-0.2	2	2020-05-11-17-23-28	2020-05-07-20-44-44	110	1	73	Detection relocated
2020	5	11	17	24	21	38.0732	22.9332	8.35	n/a	2	2020-05-11-17-24-21	2020-05-24-02-51-46	6	2	47	Detection relocated
2020	5	11	17	28	45.96	38.0588	22.9386	7.87	0.1	2	2020-05-11-17-28-45	2020-05-15-22-57-01	6	2	71	Detection relocated
2020	5	11	17	34	23.28	38.0115	22.9428	4.74	n/a	2	2020-05-11-17-34-23	2020-05-23-21-32-47	110	1	73	Detection relocated
2020	5	11	18	4	15.3	38.0314	22.9458	6.05	0.6	2	2020-05-11-18-04-15	2020-04-04-01-45-18	6	1	79	Detection relocated
2020	5	11	18	6	24.36	38.0709	22.935	5.6	n/a	2	2020-05-11-18-06-24	2020-05-20-22-40-34	6	2	42	Detection relocated
2020	5	11	18	23	19.38	38.0141	22.9529	6.67	n/a	2	2020-05-11-18-23-19	2020-04-03-09-36-54	6	1	79	Detection relocated
2020	5	11	18	50	41.8	38.0587	22.9212	7.04	0.6	2	2020-05-11-18-50-41	2020-05-15-15-41-15	6	2	51	Detection relocated
2020	5	11	18	52	56.28	38.0473	22.9506	2.93	0.5	2	2020-05-11-18-52-56	2020-05-09-00-00-51	48	1	72	Detection relocated
2020	5	11	19	17	54.48	38.0579	22.9474	7.85	n/a	2	2020-05-11-19-17-54	2020-05-15-22-57-01	6	2	71	Detection relocated
2020	5	11	19	39	57.26	38.1834	22.5744	13.37	1.1	2	2020-05-11-19-39-57	2020-05-11-11-49-59	75	10	101	Detection relocated
2020	5	11	19	43	41.48	38.0338	22.9472	8.56	0.5	2	2020-05-11-19-43-41	2020-05-16-19-57-00	6	1	51	Detection relocated
2020	5	11	19	52	38	38.0677	22.9237	5.13	0.1	2	2020-05-11-19-52-37	2020-05-20-22-40-34	6	2	42	Detection relocated
2020	5	11	19	56	31.68	38.1668	22.6337	12.71	0.7	2	2020-05-11-19-56-31	2020-05-16-08-00-31	118	9	147	Detection relocated
2020	5	11	19	58	58.2	38.0478	22.9475	5.89	0.3	2	2020-05-11-19-58-58	2020-05-23-15-08-57	6	1	26	Detection relocated
2020	5	11	20	14	35.56	38.0664	22.9404	7.06	-0.4	2	2020-05-11-20-14-35	2020-05-15-15-41-15	6	2	51	Detection relocated
2020	5	11	20	31	56.32	38.073	22.9432	5.85	0.2	2	2020-05-11-20-31-56	2020-05-20-22-40-34	6	2	42	Detection relocated
2020	5	11	20	38	25.8	38.0342	22.9369	5.06	-0.1	2	2020-05-11-20-38-25	2020-05-07-20-44-44	110	1	73	Detection relocated
2020	5	11	21	2	10.94	38.0654	22.938	6.96	-0.6	2	2020-05-11-21-02-10	2020-05-15-15-41-15	6	2	51	Detection relocated
2020	5	11	21	16	2.72	37.9966	22.9744	8.94	0.2	2	2020-05-11-21-16-02	2020-07-07-13-29-46	6	1	42	Detection relocated
2020	5	11	21	19	7.14	38.0551	22.9364	7.72	-0.3	2	2020-05-11-21-19-07	2020-05-15-22-57-01	6	2	71	Detection relocated
2020	5	11	21	20	26.96	38.0716	22.9385	5.7	-0.1	2	2020-05-11-21-20-26	2020-05-20-22-40-34	6	2	42	Detection relocated
2020	5	11	21	32	42.2	38.0529	22.9404	7.55	0.8	2	2020-05-11-21-32-42	2020-06-02-00-19-43	6	2	26	Detection relocated
2020	5	11	21	33	3.54	38.0627	22.9289	7.08	1	2	2020-05-11-21-33-03	2020-05-15-15-41-15	6	2	51	Detection relocated
2020	5	11	21	33	58.44	38.0691	22.9271	5.32	0	2	2020-05-11-21-33-58	2020-05-20-22-40-34	6	2	42	Detection relocated
2020	5	11	21	36	0.559998	38.0473	22.9487	5.6	-0.1	2	2020-05-11-21-36-00	2020-05-15-23-58-16	48	1	105	Detection relocated
2020	5	11	21	39	58.36	38.0363	22.9368	5.17	1.3	2	2020-05-11-21-39-58	2020-05-10-01-14-50	48	1	143	Detection relocated
2020	5	11	21	41	24.656	38.1933	22.5711	5.62	1.9	1	2020-05-11-21-41-20	2020-05-11-21-41-20	75	10	101	Template reloc
2020	5	11	21	54	22.2	38.0676	22.9241	5.14	-0.4	2	2020-05-11-21-54-22	2020-05-20-22-40-34	6	2	42	Detection relocated
2020	5	11	21	55	48.56	38.0519	22.9399	7.51	n/a	2	2020-05-11-21-55-48	2020-06-02-00-19-43	6	2	26	Detection relocated
2020	5	11	22	1	40.36	38.0301	22.9477	5.6	0.3	2	2020-05-11-22-01-40	2020-05-05-15-58-58	6	1	26	Detection relocated
2020	5	11	22	7	55.2	38.0492	22.9397	9.79	0.7	2	2020-05-11-22-07-55	2020-07-12-06-57-27	6	2	42	Detection relocated
2020	5	11	22	9	20.28	38.0572	22.9222	7	-0.3	2	2020-05-11-22-09-20	2020-05-15-15-41-15	6	2	51	Detection relocated
2020	5	11	22	16	47.28	38.1878	22.5777	13.17	1	2	2020-05-11-22-16-47	2020-05-13-00-10-42	75	10	101	Detection relocated
2020	5	11	22	17	3.48	38.0349	22.949	4.77	-0.2	2	2020-05-11-22-17-03	2020-05-12-01-36-53	6	1	26	Detection relocated
2020	5	11	22	23	16.84	38.0426	22.9392	5.45	-0.2	2	2020-05-11-22-23-16	2020-05-15-23-58-16	48	1	105	Detection relocated
2020	5	11	22	23	43.08	38.1884	22.5745	13.4	1	2	2020-05-11-22-23-43	2020-05-13-00-10-42	75	10	101	Detection relocated
2020	5	11	22	28	2.96	38.1694	22.629	12.4	0.2	2	2020-05-11-22-28-02	2020-05-16-08-00-31	118	9	147	Detection relocated
2020	5	11	22	29	25.28	38.187	22.5749	12.87	1	2	2020-05-11-22-29-25	2020-05-13-00-10-42	75	10	101	Detection relocated
2020	5	11	22	34	8.04	38.0459	22.9449	2.78	-0.2	2	2020-05-11-22-34-08	2020-05-09-00-00-51	48	1	72	Detection relocated
2020	5	11	22	36	18.64	38.034	22.9377	4.97	-0.2	2	2020-05-11-22-36-18	2020-05-07-20-44-44	110	1	73	Detection relocated
2020	5	11	22	53	10.98	38.0084	22.9524	7.87	0.2	2	2020-05-11-22-53-10	2020-05-19-18-24-04	6	1	9	Detection relocated
2020	5	11	23	1	40	38.0697	22.9319	5.5	1.2	2	2020-05-11-23-01-39	2020-05-20-22-40-34	6	2	42	Detection relocated
2020	5	11	23	22	44	38.0672	22.9214	5.05	0	2	2020-05-11-23-22-43	2020-05-20-22-40-34	6	2	42	Detection relocated
2020	5	11	23	24	28.88	38.0503	22.9551	5.74	n/a	2	2020-05-11-23-24-28	2020-05-22-15-32-38	6	1	141	Detection relocated
2020	5	11	23	28	30.48	38.1838	22.5751	12.64	1.1	2	2020-05-11-23-28-30	2020-05-13-00-10-42	75	10	101	Detection relocated
2020	5	11	23	37	26.28	38.1715	22.5826	18.29	0.6	2	2020-05-11-23-37-26	2020-04-18-13-25-34	75	9	101	Detection relocated
2020	5	11	23	40	29.56	38.0334	22.9583	5.75	n/a	2	2020-05-11-23-40-29	2020-07-07-13-00-03	6	1	26	Detection relocated
2020	5	12	1	16	6.8	38.0715	22.9308	5.61	0.4	2	2020-05-12-01-16-06	2020-05-20-22-40-34	6	2	42	Detection relocated
2020	5	12	1	16	25.45	38.0468	22.9478	5.58	n/a	2	2020-05-12-01-16-25	2020-05-15-23-58-16	48	1	105	Detection relocated
2020	5	12	1	27	0.57	38.0378	22.9567	8.55	n/a	2	2020-05-12-01-27-00	2020-05-16-19-57-00	6	1	51	Detection relocated
2020	5	12	1	36	52.337	38.0419	22.9542	5.12	2	1	2020-05-12-01-36-53	2020-05-12-01-36-53	6	1	26	Template reloc
2020	5	12	1	44	35.49	38.0351	22.9558	5.61	0.7	2	2020-05-12-01-44-35	2020-05-05-15-58-58	6	1	26	Detection relocated
2020	5	12	1	48	36.09	38.0515	22.9442	7.4	-0.3	2	2020-05-12-01-48-36	2020-05-21-20-42-14	6	2	42	Detection relocated
2020	5	12	2	9	37.26	38.0503	22.9272	7.3	n/a	2	2020-05-12-02-09-37	2020-06-27-15-22-21	6	2	9	Detection relocated
2020	5	12	2	23	53.79	38.0117	22.9321	7.2	-0.4	2	2020-05-12-02-23-53	2020-07-04-02-02-37	6	1	9	Detection relocated
2020	5	12	2	26	15.22	38.0389	22.9419	7.43	-0.5	2	2020-05-12-02-26-15	2020-07-04-02-02-37	6	1	9	Detection relocated
2020	5	12	2	28	15.3	38.0498	22.9395	9.81	n/a	2	2020-05-12-02-28-15	2020-07-12-06-57-27	6	2	42	Detection relocated
2020	5	12	2	28	43.1	38.0497	22.9396	9.8	0.3	2	2020-05-12-02-28-43	2020-07-12-06-57-27	6	2	42	Detection relocated
2020	5	12	2	38	54.132	38.033	22.9116	18.04	1.5	1	2020-05-12-02-38-54	2020-05-12-02-38-54	119	0	148	Template loc
2020	5	12	2	54	51.22	38.1877	22.5777	13.18	1	2	2020-05-12-02-54-51	2020-05-13-00-10-42	75	10	101	Detection relocated
2020	5	12	3	19	0.980003	38.0706	22.934	5.55	-0.1	2	2020-05-12-03-19-00	2020-05-20-22-40-34	6	2	42	Detection relocated
2020	5	12	3	25	10.06	38.1879	22.5781	13.14	1.1	2	2020-05-12-03-25-10	2020-05-13-00-10-42	75	10	101	Detection relocated
2020	5	12	3	40	57.73	38.0271	22.9578	5.36	-0.2	2	2020-05-12-03-40-57	2020-05-05-15-58-58	6	1	26	Detection relocated
2020	5	12	4	15	36.91	38.0362	22.9458	5.7	1.2	2	2020-05-12-04-15-36	2020-05-07-02-14-28	6	1	26	Detection relocated
2020	5	12	4	32	57.37	38.0185	22.9509	5.52	0.4	2	2020-05-12-04-32-57	2020-05-20-19-34-43	6	1	26	Detection relocated
2020	5	12	5	16	26.8	38.0292	22.9568	5.64	0.2	2	2020-05-12-05-16-26	2020-05-20-19-34-43	6	1	26	Detection relocated
2020	5	12	5	49	26.37	38.0714	22.9366	5.66	-0.1	2	2020-05-12-05-49-26	2020-05-20-22-40-34	6	2	42	Detection relocated
2020	5	12	5	57	47.12	38.0486	22.9403	9.77	0	2	2020-05-12-05-57-47	2020-07-12-06-57-27	6	2	42	Detection relocated
2020	5	12	6	33	49.88	38.0183	22.9628	5.4	-0.1	2	2020-05-12-06-33-49	2020-05-20-19-34-43	6	1	26	Detection relocated
2020	5	12	6	56	41.34	38.0497	22.94	9.79	0.9	2	2020-05-12-06-56-41	2020-07-12-06-57-27	6	2	42	Detection relocated
2020	5	12	6	59	19.14	38.0738	22.9297	6.94	n/a	2	2020-05-12-06-59-19	2020-05-12-14-58-08	6	2	54	Detection relocated
2020	5	12	7	13	18.99	38.072	22.9455	5.5	n/a	2	2020-05-12-07-13-18	2020-05-20-22-40-34	6	2	42	Detection relocated
2020	5	12	7	47	27.12	38.0592	22.9483	6.55	n/a	2	2020-05-12-07-47-26	2020-07-07-19-23-21	6	2	54	Detection relocated
2020	5	12	7	53	35.88	38.0694	22.9307	5.39	0.1	2	2020-05-12-07-53-35	2020-05-20-22-40-34	6	2	42	Detection relocated
2020	5	12	7	58	40.554	38.0633	22.9487	4.9	1.7	1	2020-05-12-07-58-40	2020-05-12-07-58-40	48	1	143	Template reloc
2020	5	12	7	59	30.99	38.0401	22.9429	4.53	n/a	2	2020-05-12-07-59-30	2020-05-07-20-44-44	110	1	73	Detection relocated
2020	5	12	8	5	9.17	37.9989	22.9798	8.99	0.2	2	2020-05-12-08-05-09	2020-07-07-13-29-46	6	1	42	Detection relocated
2020	5	12	8	9	13.35	38.0508	22.9422	7.4	0.3	2	2020-05-12-08-09-13	2020-05-21-20-42-14	6	2	42	Detection relocated
2020	5	12	8	20	1.48	38.0502	22.9398	9.82	0.7	2	2020-05-12-08-20-01	2020-07-12-06-57-27	6	2	42	Detection relocated
2020	5	12	8	21	31.55	38.0688	22.9303	5.33	0.4	2	2020-05-12-08-21-31	2020-05-20-22-40-34	6	2	42	Detection relocated
2020	5	12	8	43	20.45	38.0491	22.9424	8.19	0.7	2	2020-05-12-08-43-20	2020-05-22-18-58-33	6	1	54	Detection relocated
2020	5	12	8	50	17.17	38.0721	22.942	5.78	-0.3	2	2020-05-12-08-50-17	2020-05-20-22-40-34	6	2	42	Detection relocated
2020	5	12	8	54	50.73	38.0667	22.9213	4.98	n/a	2	2020-05-12-08-54-50	2020-05-20-22-40-34	6	2	42	Detection relocated
2020	5	12	9	9	50.03	38.048	22.9503	5.62	-0.1	2	2020-05-12-09-09-50	2020-05-15-23-58-16	48	1	105	Detection relocated
2020	5	12	9	20	16.18	38.0439	22.9298	5.8	0.5	2	2020-05-12-09-20-16	2020-05-19-07-37-09	48	1	109	Detection relocated
2020	5	12	9	23	37.89	38.0422	22.9375	2.41	-0.1	2	2020-05-12-09-23-37	2020-05-09-00-00-51	48	1	72	Detection relocated
2020	5	12	9	58	7.85	38.0698	22.9322	5.47	1.5	2	2020-05-12-09-58-07	2020-05-20-22-40-34	6	2	42	Detection relocated
2020	5	12	10	22	32.12	38.0114	22.9396	8.42	n/a	2	2020-05-12-10-22-32	2020-05-16-19-57-00	6	1	51	Detection relocated
2020	5	12	10	23	19.66	38.075	22.946	6.2	n/a	2	2020-05-12-10-23-19	2020-05-20-22-40-34	6	2	42	Detection relocated
2020	5	12	10	23	28.12	38.0441	22.946	5.52	0.4	2	2020-05-12-10-23-28	2020-05-15-23-58-16	48	1	105	Detection relocated
2020	5	12	10	26	19.56	38.0326	22.9617	5.53	0	2	2020-05-12-10-26-19	2020-05-20-19-34-43	6	1	26	Detection relocated
2020	5	12	10	47	1.35	38.0588	22.9418	7.85	0	2	2020-05-12-10-47-01	2020-05-15-22-57-01	6	2	71	Detection relocated
2020	5	12	11	7	34.55	38.0672	22.9435	6.97	-0.1	2	2020-05-12-11-07-34	2020-05-15-15-41-15	6	2	51	Detection relocated
2020	5	12	12	10	13.46	38.0528	22.9458	4.92	1.1	2	2020-05-12-12-10-13	2020-07-09-16-02-50	48	1	76	Detection relocated
2020	5	12	12	41	53.98	38.0485	22.9556	3.05	0.1	2	2020-05-12-12-41-53	2020-05-09-00-00-51	48	1	72	Detection relocated
2020	5	12	12	42	50.38	38.0451	22.9791	6.06	n/a	2	2020-05-12-12-42-50	2020-04-04-01-45-18	6	1	79	Detection relocated
2020	5	12	13	15	2.17	38.0299	22.9449	7.56	n/a	2	2020-05-12-13-15-02	2020-05-19-18-24-04	6	1	9	Detection relocated
2020	5	12	13	15	9.61	38.0502	22.9317	7.12	n/a	2	2020-05-12-13-15-09	2020-05-12-14-58-08	6	2	54	Detection relocated
2020	5	12	13	43	17.59	38.0225	22.9425	5.09	0.2	2	2020-05-12-13-43-17	2020-05-23-21-32-47	110	1	73	Detection relocated
2020	5	12	14	2	26.87	38.0688	22.9296	5.33	n/a	2	2020-05-12-14-02-26	2020-05-20-22-40-34	6	2	42	Detection relocated
2020	5	12	14	7	7.62	38.045	22.9436	5.52	0	2	2020-05-12-14-07-07	2020-05-15-23-58-16	48	1	105	Detection relocated
2020	5	12	14	21	5.68	38.0465	22.9442	5.62	0.9	2	2020-05-12-14-21-05	2020-05-15-23-58-16	48	1	105	Detection relocated
2020	5	12	14	25	8.38	38.0735	22.9395	5.9	1.2	2	2020-05-12-14-25-08	2020-05-20-22-40-34	6	2	42	Detection relocated
2020	5	12	14	58	7.948	38.0531	22.9366	7.14	1.8	1	2020-05-12-14-58-08	2020-05-12-14-58-08	6	2	54	Template reloc
2020	5	12	14	59	40.1	38.3536	22.6919	28.65	1.8	2	2020-05-12-14-59-40	2020-03-16-15-58-47	53	7	78	Detection relocated
2020	5	12	15	1	12.82	38.0165	22.9434	4.96	n/a	2	2020-05-12-15-01-12	2020-05-23-21-32-47	110	1	73	Detection relocated
2020	5	12	15	19	22.616	38.004	23.0068	34.77	1.9	1	2020-05-12-15-19-22	2020-05-12-15-19-22	48	0	143	Template loc
2020	5	12	15	30	3.18	38.0461	22.9417	5.57	0.2	2	2020-05-12-15-30-03	2020-05-22-15-32-38	6	1	141	Detection relocated
2020	5	12	15	53	9.7	38.0566	22.9409	7.78	n/a	2	2020-05-12-15-53-09	2020-05-15-22-57-01	6	2	71	Detection relocated
2020	5	12	16	28	37.43	38.0718	22.9419	9.18	-0.4	2	2020-05-12-16-28-37	2020-05-16-19-59-13	6	2	42	Detection relocated
2020	5	12	17	49	24.48	38.0462	22.9448	5.61	0.9	2	2020-05-12-17-49-24	2020-05-15-23-58-16	48	1	105	Detection relocated
2020	5	12	17	55	57.12	38.0351	22.9328	5.3	n/a	2	2020-05-12-17-55-57	2020-05-15-23-58-16	48	1	105	Detection relocated
2020	5	12	18	11	27.12	38.0454	22.9579	7.2	n/a	2	2020-05-12-18-11-27	2020-04-14-04-53-28	6	1	79	Detection relocated
2020	5	12	18	36	47.1	38.0443	22.9449	5.77	n/a	2	2020-05-12-18-36-47	2020-05-22-15-32-38	6	1	141	Detection relocated
2020	5	12	18	45	39.32	38.04	22.9676	6.52	0.8	2	2020-05-12-18-45-39	2020-04-13-13-58-38	6	1	84	Detection relocated
2020	5	12	18	46	37.58	38.0438	22.9444	5.27	0.3	2	2020-05-12-18-46-37	2020-05-15-23-58-16	48	1	105	Detection relocated
2020	5	12	19	28	23.44	38.0376	22.9332	5.28	n/a	2	2020-05-12-19-28-23	2020-05-09-21-51-05	48	1	136	Detection relocated
2020	5	12	20	12	38.48	38.0497	22.9417	9.8	0	2	2020-05-12-20-12-38	2020-07-12-06-57-27	6	2	42	Detection relocated
2020	5	12	20	51	14.34	38.0278	22.9498	5.18	0.2	2	2020-05-12-20-51-14	2020-05-23-21-32-47	110	1	73	Detection relocated
2020	5	12	20	55	48.84	38.0529	22.9345	7.19	0.2	2	2020-05-12-20-55-48	2020-07-07-19-23-21	6	2	54	Detection relocated
2020	5	12	21	5	39.02	38.0455	22.9455	5.53	-0.1	2	2020-05-12-21-05-39	2020-05-15-23-58-16	48	1	105	Detection relocated
2020	5	12	21	57	53.14	38.043	22.9404	8.03	1.4	2	2020-05-12-21-57-53	2020-05-22-18-58-33	6	1	54	Detection relocated
2020	5	12	22	16	0	38.0345	22.9389	4.96	1	2	2020-05-12-22-16-00	2020-05-07-20-44-44	110	1	73	Detection relocated
2020	5	12	22	41	2.52	38.0448	22.9419	8.04	1.2	2	2020-05-12-22-41-02	2020-05-22-18-58-33	6	1	54	Detection relocated
2020	5	12	22	43	46.56	38.0587	22.9482	7.76	0.8	2	2020-05-12-22-43-46	2020-05-15-22-57-01	6	2	71	Detection relocated
2020	5	12	23	18	10.84	38.0468	22.9482	2.88	0	2	2020-05-12-23-18-10	2020-05-09-00-00-51	48	1	72	Detection relocated
2020	5	12	23	25	1.98	38.0211	22.9431	8.55	-0.4	2	2020-05-12-23-25-01	2020-05-16-19-57-00	6	1	51	Detection relocated
2020	5	12	23	51	28.24	38.0079	22.938	4.49	n/a	2	2020-05-12-23-51-28	2020-05-23-21-32-47	110	1	73	Detection relocated
2020	5	12	23	56	0.839996	38.0428	22.9399	5.45	0	2	2020-05-12-23-56-00	2020-05-15-23-58-16	48	1	105	Detection relocated
2020	5	13	0	7	32.47	38.041	22.956	4.78	-0.1	2	2020-05-13-00-07-32	2020-05-26-20-10-03	6	1	110	Detection relocated
2020	5	13	0	10	41.531	38.188	22.578	13.13	2.5	1	2020-05-13-00-10-42	2020-05-13-00-10-42	75	10	101	Template reloc
2020	5	13	0	12	33.86	38.1868	22.5711	14.87	n/a	2	2020-05-13-00-12-33	2020-05-13-00-10-42	75	10	101	Detection relocated
2020	5	13	0	13	5.88	38.1888	22.5753	12.68	1.5	2	2020-05-13-00-13-05	2020-05-13-00-10-42	75	10	101	Detection relocated
2020	5	13	0	17	51.01	38.1816	22.574	13.68	1.3	2	2020-05-13-00-17-51	2020-05-11-11-49-59	75	10	101	Detection relocated
2020	5	13	0	31	53.901	38.0139	22.9701	5.43	1.7	1	2020-05-13-00-31-54	2020-05-13-00-31-54	120	1	149	Template reloc
2020	5	13	0	51	40.83	38.1823	22.5805	18.87	1.1	2	2020-05-13-00-51-40	2020-05-11-11-46-25	75	9	101	Detection relocated
2020	5	13	1	1	53.5	38.1913	22.5795	10.97	1.4	1	2020-05-13-01-01-53	2020-05-13-01-01-53	121	10	150	Template reloc
2020	5	13	1	14	34.51	38.0427	22.9384	2.46	n/a	2	2020-05-13-01-14-34	2020-05-09-00-00-51	48	1	72	Detection relocated
2020	5	13	1	24	49.534	38.0024	22.9882	13.59	1.7	1	2020-05-13-01-24-49	2020-05-13-01-24-49	6	1	26	Template reloc
2020	5	13	1	34	34.63	38.0362	22.9562	5.83	1	2	2020-05-13-01-34-34	2020-07-07-13-00-03	6	1	26	Detection relocated
2020	5	13	1	47	34.16	38.1834	22.5742	13.43	1.2	2	2020-05-13-01-47-34	2020-05-11-11-49-59	75	10	101	Detection relocated
2020	5	13	1	53	2.63	38.0322	22.9524	5.83	-0.2	2	2020-05-13-01-53-02	2020-07-07-13-00-03	6	1	26	Detection relocated
2020	5	13	1	55	53.81	38.0486	22.944	8.29	0.2	2	2020-05-13-01-55-53	2020-05-22-18-58-33	6	1	54	Detection relocated
2020	5	13	1	58	56.54	38.05	22.9488	8.23	0.2	2	2020-05-13-01-58-56	2020-05-22-18-58-33	6	1	54	Detection relocated
2020	5	13	2	2	4.14	38.0677	22.963	6.2	1.2	1	2020-05-13-02-02-04	2020-05-13-02-02-04	6	1	42	Template reloc
2020	5	13	2	3	8.42	38.0162	22.9783	6.19	0.6	2	2020-05-13-02-03-08	2020-04-21-15-58-52	6	1	99	Detection relocated
2020	5	13	2	24	22.01	38.0464	22.948	5.8	-0.3	2	2020-05-13-02-24-22	2020-05-23-15-08-57	6	1	26	Detection relocated
2020	5	13	2	26	28.36	38.0451	22.9324	5.92	-0.5	2	2020-05-13-02-26-28	2020-05-18-20-36-52	6	1	142	Detection relocated
2020	5	13	2	34	20.05	38.0632	22.9432	7.53	0	2	2020-05-13-02-34-20	2020-05-18-06-05-04	6	2	24	Detection relocated
2020	5	13	2	36	5.51	38.0277	22.9458	8.55	-0.5	2	2020-05-13-02-36-05	2020-05-16-19-57-00	6	1	51	Detection relocated
2020	5	13	2	49	18.64	38.0346	22.9558	5.83	-0.2	2	2020-05-13-02-49-18	2020-07-07-13-00-03	6	1	26	Detection relocated
2020	5	13	2	53	43.02	38.0515	22.9354	7.1	-0.1	2	2020-05-13-02-53-43	2020-05-12-14-58-08	6	2	54	Detection relocated
2020	5	13	3	12	2.19	38.0483	22.9372	7.4	0.3	2	2020-05-13-03-12-02	2020-06-02-00-19-43	6	2	26	Detection relocated
2020	5	13	3	12	23.07	38.0372	22.9446	6.15	n/a	2	2020-05-13-03-12-23	2020-04-04-01-45-18	6	1	79	Detection relocated
2020	5	13	3	20	23.88	38.0489	22.95	7.28	1	2	2020-05-13-03-20-23	2020-05-21-20-42-14	6	2	42	Detection relocated
2020	5	13	3	36	50.36	38.0671	22.9265	7.15	0.2	2	2020-05-13-03-36-50	2020-05-19-05-59-16	6	2	56	Detection relocated
2020	5	13	3	37	57.47	38.1722	22.5805	18.47	0.3	2	2020-05-13-03-37-57	2020-04-18-13-25-34	75	9	101	Detection relocated
2020	5	13	3	53	23.02	38.1795	22.6346	13.2	n/a	2	2020-05-13-03-53-23	2020-05-16-10-46-59	118	9	147	Detection relocated
2020	5	13	3	54	52.58	38.0463	22.9451	5.58	1.1	2	2020-05-13-03-54-52	2020-05-15-23-58-16	48	1	105	Detection relocated
2020	5	13	4	3	17.9	38.1723	22.5803	18.51	0.7	2	2020-05-13-04-03-17	2020-04-18-13-25-34	75	9	101	Detection relocated
2020	5	13	4	8	49.27	38.049	22.933	9.82	n/a	2	2020-05-13-04-08-49	2020-07-12-06-57-27	6	2	42	Detection relocated
2020	5	13	4	50	50.73	38.0692	22.9291	5.36	0.2	2	2020-05-13-04-50-50	2020-05-20-22-40-34	6	2	42	Detection relocated
2020	5	13	5	0	54.76	38.046	22.9451	5.54	1.1	2	2020-05-13-05-00-54	2020-05-15-23-58-16	48	1	105	Detection relocated
2020	5	13	5	50	8.28	37.9922	22.9579	8.71	0.2	2	2020-05-13-05-50-08	2020-07-07-13-29-46	6	1	42	Detection relocated
[truncated: 9,639 more rows]
